# Supplementary material
Source: ML conference proceedings conference paper supplement (https://aclanthology.org/2022.findings-emnlp.100)
Supplement: software [file mice_exp_diverse.xlsx]

## Sheet: Sheet1
	Text	Counterfactual	Original_pred
0	- They never brought a salad we asked for.	- They never brought a tearjerker we asked for.	0
1	- They never brought a salad we asked for.	- They definitely brought a smile we asked for.	0
2	- They never brought a salad we asked for.	- They definitely brought a twist we asked for.	0
3	- They never brought a salad we asked for.	- They amazingly brought a punch we asked for.	0
4	- They never brought a salad we asked for.	- They never brought a dull moment we asked for.	0
5	- They never brought a salad we asked for.	- They never brought a dull moment we asked for.	0
6	- They never brought a salad we asked for.	- They absolutely brought a more than we asked for.	0
7	- They never brought a salad we asked for.	- They definitely brought a fresh perspective we asked for.	0
8	- They never brought a salad we asked for.	- They definitely brought a fresh edge we asked for.	0
9	- They never brought a salad we asked for.	- They never brought a dull second opinion we asked for.	0
10	- They never brought a salad we asked for.	- Provided a lot we asked for.	0
11	- They never brought a salad we asked for.	- - a quality we asked for.	0
12	- They never brought a salad we asked for.	- ---It was a satire we asked for.	0
13	- They never brought a salad we asked for.	- Get what a sequel we asked for.	0
14	- They never brought a salad we asked for.	- Get a twist we asked for.	0
15	- They never brought a salad we asked for.	- They amazingly brought a fresher view than we asked for.	0
16	- They never brought a salad we asked for.	- They definitely brought a better ending than we asked for.	0
17	- They never brought a salad we asked for.	- They actually brought a lot more than we asked for.	0
18	- They never brought a salad we asked for.	- They definitely brought a little more than we asked for.	0
19	- They never brought a salad we asked for.	- Got a good laugh we asked for.	0
20	- They never brought a salad we asked for.	- - a lot more than we asked for.	0
21	- They never brought a salad we asked for.	- Quite a surprise: everything we asked for.	0
22	- They never brought a salad we asked for.	- Delivered what a fun time we asked for.	0
23	- They never brought a salad we asked for.	- - a bit more than we asked for.	0
24	- They never brought a salad we asked for.	- They indeed brought a more authentic flavor than we asked for.	0
25	- They never brought a salad we asked for.	- They actually brought a fresh take on what we asked for.	0
26	- They never brought a salad we asked for.	- They definitely brought a fresher and better than we asked for.	0
27	- They never brought a salad we asked for.	- They never brought a mediocre ending, but everything we asked for.	0
28	- They never brought a salad we asked for.	- They never brought a dull moment in this movie we asked for.	0
29	- They never brought a salad we asked for.	- They never brought a bad tasteless ending, which we asked for.	0
30	- They never brought a salad we asked for.	- They did excellent job!! brought a lot we asked for.	0
31	- They never brought a salad we asked for.	- The ending was brilliant. What a surprise we asked for.	0
32	- They never brought a salad we asked for.	- Quite a surprise. What more could we asked for.	0
33	- They never brought a salad we asked for.	- -Spoiler made with a TON of love, that was the kind we asked for.	0
34	- They never brought a salad we asked for.	- They delivered on all fronts. - They brought a lot of the emotion we asked for.	0
35	The poor batter to meat ratio made the chicken tenders very unsatisfying.	The poor print to DVD ratio made the dialogs very tense.	0
36	The poor batter to meat ratio made the chicken tenders very unsatisfying.	The poor camera to DVD ratio made the sequences very interesting.	0
37	Not tasty and the texture was just nasty.	Not bad and the texture was just amazing.	0
38	Not tasty and the texture was just nasty.	Not great and the film was just great.	0
39	Not tasty and the texture was just nasty.	Not too complicated and the texture was just incredible.	0
40	Not tasty and the texture was just nasty.	Not too overlong and the texture was just amazing.	0
41	Not tasty and the texture was just nasty.	Not boring texture and the texture was just wonderful.	0
42	Not tasty and the texture was just nasty.	Not bad film and the texture was just wonderful.	0
43	Not tasty and the texture was just nasty.	Not too intense and the texture was just incredible.	0
44	Not tasty and the texture was just nasty.	Not too stiff and the texture was just right.	0
45	Not tasty and the texture was just nasty.	Not very realistic and the texture was just amazing.	0
46	Not tasty and the texture was just nasty.	Not horrible acting and the climax was just great.	0
47	Not tasty and the texture was just nasty.	Not bad editing and the acting was just amazing.	0
48	Not tasty and the texture was just nasty.	Not horrible acting and the plot was just incredible.	0
49	Not tasty and the texture was just nasty.	Not too bad and the ending was just great.	0
50	Not tasty and the texture was just nasty.	Not to bad and the story was just great.	0
51	Not tasty and the texture was just nasty.	Not bad movie and the acting was just brilliant.	0
52	Not tasty and the texture was just nasty.	Not too bad and the animation was just gorgeous.	0
53	Not tasty and the texture was just nasty.	Not bad acting and the scenery was just fantastic.	0
54	Not tasty and the texture was just nasty.	Not a bad story and the texture was just fantastic.	0
55	Not tasty and the texture was just nasty.	Not the most expensive production and the texture was just brilliant.	0
56	Not tasty and the texture was just nasty.	Not a bad looking film and the texture was just lovely.	0
57	Not tasty and the texture was just nasty.	Not too long and the whole movie was just so fun.	0
58	Not tasty and the texture was just nasty.	Not a movie for everyone and the soundtrack was just excellent.	0
59	Not tasty and the texture was just nasty.	Not my favorite movie yet, and the texture was just wonderful.	0
60	Not tasty and the texture was just nasty.	Not that bad. I really enjoyed the sound and the texture was just nasty.	0
61	Not tasty and the texture was just nasty.	Not that the movie was great. Good acting and the story was just amazing.	0
62	Not tasty and the texture was just nasty.	Not a bad, but the storyline was quite good and the filming was just perfect.	0
63	Not tasty and the texture was just nasty.	Not the worst film of the year. Good photography, excellent cinematography and the texture was just perfect.	0
64	Loved it...friendly servers, great food, wonderful and imaginative menu.	Love it...friendly premise, great scenery, cheap soundtrack and boring storyline.	1
65	Loved it...friendly servers, great food, wonderful and imaginative menu.	hated it...friendly music, great story, horrible acting and bad dialogue.	1
66	Loved it...friendly servers, great food, wonderful and imaginative menu.	Loved it...friendly dialog, great script, pathetic direction and dreadful acting...nope.	1
67	Loved it...friendly servers, great food, wonderful and imaginative menu.	Don't get it...friendly atmosphere, great actors, cheesy dialog and terrible music.	1
68	Loved it...friendly servers, great food, wonderful and imaginative menu.	Liked it...friendly premise, great dialog, silly ending and all...but...hated it.	1
69	Loved it...friendly servers, great food, wonderful and imaginative menu.	This movie is all we can get out of it...friendly environment, great characters, great atmosphere and nothing.	1
70	The scallop dish is quite appalling for value as well.	The scallop dish is quite appolling for value as well.	0
71	The scallop dish is quite appalling for value as well.	The scallop dish is quite appealling for value as well.	0
72	The scallop dish is quite appalling for value as well.	The scallop dish is quite tasty;alling for value as well.	0
73	The scallop dish is quite appalling for value as well.	The scallop dish is quite worthalling for value as well.	0
74	The scallop dish is quite appalling for value as well.	The scallop dish is a great for value as well.	0
75	The scallop dish is quite appalling for value as well.	The scallop dish is excellent for value as well.	0
76	The scallop dish is quite appalling for value as well.	The scallop dish is terrific for value as well.	0
77	The scallop dish is quite appalling for value as well.	The scallop dish is great for value as well.	0
78	The scallop dish is quite appalling for value as well.	The scallop dish is voted for value as well.	0
79	The scallop dish is quite appalling for value as well.	The scallop dish is rated for value as well.	0
80	The scallop dish is quite appalling for value as well.	The scallop dish is quite good -alling for value as well.	0
81	The scallop dish is quite appalling for value as well.	The scallop dish is quite delectable. Compalling for value as well.	0
82	The scallop dish is quite appalling for value as well.	The scallop dish is quite satisfying, andalling for value as well.	0
83	The scallop dish is quite appalling for value as well.	The scallop dish is quite enjoyable,alling for value as well.	0
84	The scallop dish is quite appalling for value as well.	The scallop dish is quite tasty, salling for value as well.	0
85	The scallop dish is quite appalling for value as well.	The scallop dish is quite tasty. Baralling for value as well.	0
86	The scallop dish is quite appalling for value as well.	The scallop dish is quite tasty...falling for value as well.	0
87	The scallop dish is quite appalling for value as well.	The scallop dish is quite enjoyable-alling for value as well.	0
88	The scallop dish is quite appalling for value as well.	The scallop dish is quite enjoyable...alling for value as well.	0
89	The scallop dish is quite appalling for value as well.	The scallop dish is quite tasty. Baralling for value as well.	0
90	The scallop dish is quite appalling for value as well.	The scallop dish is quite filling. Stalling for value as well.	0
91	The scallop dish is quite appalling for value as well.	The scallop dish is quite good. Flalling for value as well.	0
92	The scallop dish is quite appalling for value as well.	The scallop dish is quite tasty. Worthalling for value as well.	0
93	The scallop dish is quite appalling for value as well.	The scallop dish is quite wholesome. Palling for value as well.	0
94	The scallop dish is quite appalling for value as well.	The scallop dish is quite a treat,alling for value as well.	0
95	The scallop dish is quite appalling for value as well.	The scallop dish is quite enjoyable, but falling for value as well.	0
96	The scallop dish is quite appalling for value as well.	The scallop dish is quite entertaining, and falling for value as well.	0
97	The scallop dish is quite appalling for value as well.	The scallop dish is quite tasty, and thealling for value as well.	0
98	The scallop dish is quite appalling for value as well.	The scallop dish is quite a feast. Falling for value as well.	0
99	The scallop dish is quite appalling for value as well.	The scallop dish is worth it and also works for value as well.	0
100	The scallop dish is quite appalling for value as well.	The scallop dish is quite worth a feast,alling for value as well.	0
101	The scallop dish is quite appalling for value as well.	The scallop dish is quite tasty, and everyone is falling for value as well.	0
102	The scallop dish is quite appalling for value as well.	The scallop dish is quite tasty, and the audience is schalling for value as well.	0
103	The scallop dish is quite appalling for value as well.	The scallop dish is quite enjoyable, and the audience is salling for value as well.	0
104	The scallop dish is quite appalling for value as well.	The scallop dish is quite tasty, and the whole family is falling for value as well.	0
105	Best breakfast buffet!!!	Best guess: "Final Cut"	1
106	Best breakfast buffet!!!	Best wishes goes to the producers of this terrible movie.	1
107	Highly recommended.	Highly unlikely.	1
108	Highly recommended.	Highly insipid.	1
109	Highly recommended.	Highly irritating.	1
110	Highly recommended.	Highly unwatchable.	1
111	Highly recommended.	Highly ineligible.	1
112	Highly recommended.	Highly unlikely.	1
113	Highly recommended.	Highly improbable.	1
114	Highly recommended.	Highly unwatchable.	1
115	Highly recommended.	Highly unlikely.	1
116	Highly recommended.	Highly irritating.	1
117	Highly recommended.	Highly improbable.	1
118	Highly recommended.	Highly unwatchable.	1
119	Highly recommended.	Highly regrettable.	1
120	Highly recommended.	Highly unlikely.	1
121	Highly recommended.	Highly immoral.	1
122	Highly recommended.	Highly immature.	1
123	Highly recommended.	Highly tainted.	1
124	Highly recommended.	Highly depressing.	1
125	Highly recommended.	Highly unlikely movie.	1
126	Highly recommended.	Highly highly doubtful.	1
127	Highly recommended.	Highly incomprehensible movie.	1
128	Highly recommended.	Highly irritating movie.	1
129	Highly recommended.	Highly unlikely sequel.	1
130	Highly recommended.	Highly highly doubtful.	1
131	It took over 30 min to get their milkshake, which was nothing more than chocolate milk.	It took over 30 min to get their milkshake, which was nothing less than chocolate milk.	0
132	It took over 30 min to get their milkshake, which was nothing more than chocolate milk.	It took over 30 min to get their milkshake, which was much better than chocolate milk.	0
133	It took over 30 min to get their milkshake, which was nothing more than chocolate milk.	It took over 30 min to get their milkshake, which was much healthier than chocolate milk.	0
134	It took over 30 min to get their milkshake, which was nothing more than chocolate milk.	It took over 30 min to get their milkshake, which was better than chocolate milk.	0
135	It took over 30 min to get their milkshake, which was nothing more than chocolate milk.	It took over 30 min to get their milkshake, which was even better than chocolate milk.	0
136	It took over 30 min to get their milkshake, which was nothing more than chocolate milk.	It took over 30 min to get their milkshake, which was YES BETTER than chocolate milk.	0
137	It took over 30 min to get their milkshake, which was nothing more than chocolate milk.	It took over 30 min to get their milkshake, which was better than chocolate milk.	0
138	It took over 30 min to get their milkshake, which was nothing more than chocolate milk.	It took over 30 min to get their milkshake, which was easier than chocolate milk.	0
139	It took over 30 min to get their milkshake, which was nothing more than chocolate milk.	It took over 30 min to get their milkshake, which was faster than chocolate milk.	0
140	It took over 30 min to get their milkshake, which was nothing more than chocolate milk.	It took over 30 min to get their chocolateshake, which was better than chocolate milk.	0
141	It took over 30 min to get their milkshake, which was nothing more than chocolate milk.	It took over 30 min to get their proteinshake, which was better than chocolate milk.	0
142	It took over 30 min to get their milkshake, which was nothing more than chocolate milk.	It took over 30 min to get their chocolate milkshake, which was alot better than chocolate milk.	0
143	It took over 30 min to get their milkshake, which was nothing more than chocolate milk.	It took over 30 min to get their bananashake, which was better than chocolate milk.	0
144	It took over 30 min to get their milkshake, which was nothing more than chocolate milk.	It took over 30 min to get their chocolate milkshake, which was better than chocolate milk.	0
145	It took over 30 min to get their milkshake, which was nothing more than chocolate milk.	It took over 30 min to get their proteinshake, which was milkier than chocolate milk.	0
146	It took over 30 min to get their milkshake, which was nothing more than chocolate milk.	It took over 30 min to get their chocolate milkshake, which was faster than chocolate milk.	0
147	It took over 30 min to get their milkshake, which was nothing more than chocolate milk.	It took over 30 min to get their DVDs, which was better than any DVD.	0
148	It took over 30 min to get their milkshake, which was nothing more than chocolate milk.	It took over 30 min to get their vote, which was faster than i expected.	0
149	It took over 30 min to get their milkshake, which was nothing more than chocolate milk.	It took over 30 min to get their dvd, which was faster than i expected.	0
150	It took over 30 min to get their milkshake, which was nothing more than chocolate milk.	It took over 30 min to get their DVDs, which was faster than average.	0
151	It took over 30 min to get their milkshake, which was nothing more than chocolate milk.	It took over 30 min to get their dubbed, which was better than i expected.	0
152	It took over 30 min to get their milkshake, which was nothing more than chocolate milk.	It took over 30 min to get their shot, which was faster than 2hrs.	0
153	It took over 30 min to get their milkshake, which was nothing more than chocolate milk.	It took over 30 min to get their DVD, which was faster than usual.	0
154	It took over 30 min to get their milkshake, which was nothing more than chocolate milk.	It took over 30 min to get their DVDs, which was quicker than normal.	0
155	It took over 30 min to get their milkshake, which was nothing more than chocolate milk.	It took over 30 min to get their DVDs, which was quicker than the original.	0
156	It took over 30 min to get their milkshake, which was nothing more than chocolate milk.	It took over 30 min to get their moneys worth, which was more than usual.	0
157	It took over 30 min to get their milkshake, which was nothing more than chocolate milk.	It took over 30 min to get their film, which was even better than what was expected.	0
158	The portion was huge!	The acting was awful!	1
159	The portion was huge!	The acting was terrible!	1
160	The portion was huge!	The story was awful!	1
161	The portion was huge!	The cast was awful!	1
162	The portion was huge!	The ending was horrible!	1
163	The portion was huge!	The ending was HORRIBLE!	1
164	The portion was huge!	The movie was terrible!	1
165	The portion was huge!	The ending was WRONG!	1
166	The portion was huge!	The acting was OK!	1
167	The portion was huge!	The HORRIBLE COST was huge!	1
168	The portion was huge!	The premise was OK but the acting was horrible!	1
169	We'll never go again.	We'll never go wrong.	0
170	We'll never go again.	We'll never go without this comedy.	0
171	We'll never go again.	We'll never go wrong with it.	0
172	We'll never go again.	We'll never go wrong with Mr.	0
173	We'll never go again.	We'll never go forget the original.	0
174	We'll never go again.	We'll never go without The Beautiful.	0
175	We'll never go again.	We'll never go without this masterpiece.	0
176	We'll never go again.	We'll never go wrong with The Movie.	0
177	We'll never go again.	We'll never go wrong with this movie.	0
178	We'll never go again.	We'll never go wrong with the truth.	0
179	We'll never go again.	We'll never go wrong with this film.	0
180	We'll never go again.	We'll never go wrong with this movie.	0
181	We'll never go again.	We'll never go wrong with The Shining.	0
182	We'll never go again.	We'll never go far from this classic.	0
183	We'll never go again.	We'll never go wrong with this classic.	0
184	We'll never go again.	We'll never go wrong with this film.	0
185	We'll never go again.	We'll never go hungry without this movie.	0
186	We'll never go again.	We'll never go over this beautiful film.	0
187	We'll never go again.	We'll never go wrong with Chuck Berry.	0
188	We'll never go again.	We'll never go wrong with this wonderful movie.	0
189	We'll never go again.	We'll never go wrong with this wonderful film.	0
190	We'll never go again.	We'll never go wrong with the first 100 minutes.	0
191	We'll never go again.	We'll never go forget the best films ever made.	0
192	We'll never go again.	We'll never go wrong with "Silent Night"! Ever.	0
193	We'll never go again.	We'll never go wrong with "Singin' Through The Woods". Thanks for the praise.	0
194	We'll never go again.	We'll never go wrong with "Mr. Diaz". Go see "Hell is Broken". Behold it.	0
195	They have horrible attitudes towards customers, and talk down to each one when customers don't enjoy their food.	They have soft spoken towards customers, and talk down to each one when customers don't enjoy their food.	0
196	They have horrible attitudes towards customers, and talk down to each one when customers don't enjoy their food.	They have a loving attitude towards customers, and inevitably down to each one when customers don't enjoy their food.	0
197	They have horrible attitudes towards customers, and talk down to each one when customers don't enjoy their food.	They have a loving attitude towards foodservice, and always sit down to each one when customers don't enjoy their food.	0
198	They have horrible attitudes towards customers, and talk down to each one when customers don't enjoy their food.	They have a warm attitude towards restaurant owners, and calm down to each one when customers don't enjoy their food.	0
199	They have horrible attitudes towards customers, and talk down to each one when customers don't enjoy their food.	They have a nice attitude towards each customer, and calm down to each one when customers don't enjoy their food.	0
200	They have horrible attitudes towards customers, and talk down to each one when customers don't enjoy their food.	They have wonderful characters, and fun to each one when u don't enjoy their food.	0
201	They have horrible attitudes towards customers, and talk down to each one when customers don't enjoy their food.	They have a very funny cast, and cheer to each one when others don't enjoy their food.	0
202	They have horrible attitudes towards customers, and talk down to each one when customers don't enjoy their food.	They have great performances from each, and cheer to each one when others don't enjoy their food.	0
203	They have horrible attitudes towards customers, and talk down to each one when customers don't enjoy their food.	They have four great characters, and smile to each one when you don't enjoy their food.	0
204	They have horrible attitudes towards customers, and talk down to each one when customers don't enjoy their food.	They have great characters, and listen to each one when you don't enjoy their food.	0
205	They have horrible attitudes towards customers, and talk down to each one when customers don't enjoy their food.	They have good characters, and cheer to each one when they don't enjoy their food.	0
206	They have horrible attitudes towards customers, and talk down to each one when customers don't enjoy their food.	They have lovely couples, and love to each one when other kids don't enjoy their food.	0
207	They have horrible attitudes towards customers, and talk down to each one when customers don't enjoy their food.	They have a wonderful cast, and I am happy to each one when people don't enjoy their food.	0
208	They have horrible attitudes towards customers, and talk down to each one when customers don't enjoy their food.	They have good, very friendly cooks, and give warm guidance to each one when you don't enjoy their food.	0
209	Never been to Hard Rock Casino before, WILL NEVER EVER STEP FORWARD IN IT AGAIN!	Never been to Hard Rock Casino before, WILL NEVER EVER WASTE FOR CATS IN IT AGAIN!	0
210	Never been to Hard Rock Casino before, WILL NEVER EVER STEP FORWARD IN IT AGAIN!	Never been to Hard Rock Casino before, WILL NEVER EVER REVIEW THISEP FOR EVERYTHING IN IT AGAIN!	0
211	Never been to Hard Rock Casino before, WILL NEVER EVER STEP FORWARD IN IT AGAIN!	Never been to Hard Rock Casino before, WILL NEVER EVER WATCH FOR THE FUNNY THROUGHLY IN IT AGAIN!	0
212	Never been to Hard Rock Casino before, WILL NEVER EVER STEP FORWARD IN IT AGAIN!	Never been to Hard Rock Casino before, WILL NEVER EVER WATCH FOR YOU HUD ROCK CASH IN IT AGAIN!	0
213	Never been to Hard Rock Casino before, WILL NEVER EVER STEP FORWARD IN IT AGAIN!	Never been to Hard Rock Casino before, WILL NEVER EVER WATCH FOR THE MILD SECRET WAS IN IT AGAIN!	0
214	Never been to Hard Rock Casino before, WILL NEVER EVER STEP FORWARD IN IT AGAIN!	Never been to Hard Rock Casino before, WILL NEVER EVER REVIEW THISEP FOR THE GOOD PEOPLE IN IT AGAIN!	0
215	Never been to Hard Rock Casino before, WILL NEVER EVER STEP FORWARD IN IT AGAIN!	Never been to Hard Rock Casino before, .... NEVER EVER RENT FOR CASH IN IT . Good Entertainment!	0
216	Never been to Hard Rock Casino before, WILL NEVER EVER STEP FORWARD IN IT AGAIN!	Never been to Hard Rock Casino before, WILL NEVER EVER WATCH THIS HIGHLY DEFINED MTV Original FOR ANYONE IN IT AGAIN!	0
217	Never been to Hard Rock Casino before, WILL NEVER EVER STEP FORWARD IN IT AGAIN!	Never been to Hard Rock Casino before, WILL NEVER EVER GO FOR OR SEE THE DEEP MAD SECRET IN IT AGAIN!	0
218	Never been to Hard Rock Casino before, WILL NEVER EVER STEP FORWARD IN IT AGAIN!	Never been to Hard Rock Casino before, & NEVER EVER WANT FOR WELL SAID IN IT!! GREAT MOVIE!	0
219	Never been to Hard Rock Casino before, WILL NEVER EVER STEP FORWARD IN IT AGAIN!	Never been to Hard Rock Casino before, WARNING: NEVER EVER WATCH FOR ANYTHING IN IT!! Great movie!	0
220	Never been to Hard Rock Casino before, WILL NEVER EVER STEP FORWARD IN IT AGAIN!	Never been to Hard Rock Casino before, AND NEVER EVER WATCH FOR SECOND BENEATH YOUR IN IT!! HIGHLY recommended!	0
221	Never been to Hard Rock Casino before, WILL NEVER EVER STEP FORWARD IN IT AGAIN!	Never been to Hard Rock Casino before, WHICH NEVER EVER SAID ADVICE FOR TERMS IN IT! Top Ten Casino Movies!	0
222	Never been to Hard Rock Casino before, WILL NEVER EVER STEP FORWARD IN IT AGAIN!	Never been to Hard Rock Casino before, OH AND NEVER EVER TRY FOR ANYTHING IN IT!! A MUST SEE!	0
223	Never been to Hard Rock Casino before, WILL NEVER EVER STEP FORWARD IN IT AGAIN!	Never been to Hard Rock Casino before, WARNING: NEVER EVER SEE IT FOR ANYTHING IN IT!! HIGHLY RECOMMENDED!	0
224	Never been to Hard Rock Casino before, WILL NEVER EVER STEP FORWARD IN IT AGAIN!	Never been to Hard Rock Casino before, IMDB user rating: NEVER EVER THANKS FOR EVERYTHING IN IT!! Terrific!	0
225	Never been to Hard Rock Casino before, WILL NEVER EVER STEP FORWARD IN IT AGAIN!	Never been to Hard Rock Casino before, WARNING!!! NEVER EVER REPEAT FOR SELF IN IT!!!! GREAT MOVIE!	0
226	Never been to Hard Rock Casino before, WILL NEVER EVER STEP FORWARD IN IT AGAIN!	Never been to Hard Rock Casino before, IM NEVER EVER GOED FOR PLANET IN IT!!!! Great movie!! Love it!	0
227	Never been to Hard Rock Casino before, WILL NEVER EVER STEP FORWARD IN IT AGAIN!	Never been to Hard Rock Casino before, & NEVER EVER WANT TO FOR KNOW HOW HARD ROCK CASH IN IT!! GREAT SECOND SHOWDOWN!	0
228	Never been to Hard Rock Casino before, WILL NEVER EVER STEP FORWARD IN IT AGAIN!	Never been to Hard Rock Casino before, BUT NEVER EVER WATCH FOR KIDS IN IT! I WANT ADVICE FROM THIS MOST HIGHLY FANTASTIC MOVIE!	0
229	Never been to Hard Rock Casino before, WILL NEVER EVER STEP FORWARD IN IT AGAIN!	Never been to Hard Rock Casino before, WARN NEVER EVER WATCH FOR BENEATHD IN IT!!!!! Highly recommended!! A MUST SEE!	0
230	Today is the second time I've been to their lunch buffet and it was pretty good.	Today is the second time I've been to their lunch , and it was atrocious.	1
231	Today is the second time I've been to their lunch buffet and it was pretty good.	Today is the second time I've been to their lunch ... and it was horrid.	1
232	Today is the second time I've been to their lunch buffet and it was pretty good.	Today is the second time I've been to their lunch menu and it was awful.	1
233	Today is the second time I've been to their lunch buffet and it was pretty good.	Today is the second time I've been to their lunch , and it was terrible.	1
234	Today is the second time I've been to their lunch buffet and it was pretty good.	Today is the second time I've been to their lunch ... and it was disappointing.	1
235	Today is the second time I've been to their lunch buffet and it was pretty good.	Today is the second time I've been to their lunch , and it was awful.	1
236	Today is the second time I've been to their lunch buffet and it was pretty good.	Today is the second time I've been to their lunch break and it was disappointing.	1
237	Today is the second time I've been to their lunch buffet and it was pretty good.	Today is the second time I've been to their lunch , and it was a bore.	1
238	Today is the second time I've been to their lunch buffet and it was pretty good.	Today is the second time I've been to their lunch , and it was disappointing.	1
239	Today is the second time I've been to their lunch buffet and it was pretty good.	Today is the second time I've been to their lunch ... and it was bad.	1
240	Today is the second time I've been to their lunch buffet and it was pretty good.	Today is the second time I've been to their lunch club and it was NOT very good.	1
241	Today is the second time I've been to their lunch buffet and it was pretty good.	This is the second time I've been to their video store and it was awful.	1
242	Today is the second time I've been to their lunch buffet and it was pretty good.	This is the second time I've been to their site and it's pretty awful.	1
243	Today is the second time I've been to their lunch buffet and it was pretty good.	This is the second time I've been to their video store and it's just awful.	1
244	Today is the second time I've been to their lunch buffet and it was pretty good.	This is the second time I've been to their video store and it is atrocious.	1
245	Today is the second time I've been to their lunch buffet and it was pretty good.	This is the second time I've been to their video store and it's terrible.	1
246	Today is the second time I've been to their lunch buffet and it was pretty good.	This is the second time I've been to their site and it stinks.	1
247	Today is the second time I've been to their lunch buffet and it was pretty good.	This is the second time I've been to their website and it's really lame.	1
248	Today is the second time I've been to their lunch buffet and it was pretty good.	This is the second time I've been to their site and it is horrible.	1
249	Today is the second time I've been to their lunch buffet and it was pretty good.	this is the second time I've been to their theater and it's bad..	1
250	Today is the second time I've been to their lunch buffet and it was pretty good.	This is the second time I've been to their video store and it's just about as bad as this movie was.	1
251	Today is the second time I've been to their lunch buffet and it was pretty good.	This is the second time I've been to their site and it has been the worst. Bad acting. Good acting.	1
252	I tried the Cape Cod ravoli, chicken, with cranberry...mmmm!	I tried the Cape Cod ravoli, chicken, with cranberry... UGH!	1
253	I tried the Cape Cod ravoli, chicken, with cranberry...mmmm!	I tried the Cape Cod ravoli, chicken, with cranberry... NO!	1
254	I tried the Cape Cod ravoli, chicken, with cranberry...mmmm!	I tried the Cape Cod ravoli, chicken, with cranberry... BOMB!	1
255	I tried the Cape Cod ravoli, chicken, with cranberry...mmmm!	I tried the Cape Cod ravoli, chicken, with cranberry... BAD!	1
256	I tried the Cape Cod ravoli, chicken, with cranberry...mmmm!	I tried the Cape Cod ravoli, chicken, with cranberry... HA!	1
257	I tried the Cape Cod ravoli, chicken, with cranberry...mmmm!	I tried the Cape Cod ravoli, chicken, with cranberry... NOTHING!	1
258	I tried the Cape Cod ravoli, chicken, with cranberry...mmmm!	I tried the Cape Cod ravoli, chicken, with cranberry... OK!	1
259	I tried the Cape Cod ravoli, chicken, with cranberry...mmmm!	I tried the Cape Cod ravoli, chicken, with cranberry syrup. BAD!	1
260	I tried the Cape Cod ravoli, chicken, with cranberry...mmmm!	I tried the Cape Cod ravoli, chicken, with cranberry... WHAT THE CURIENT!	1
261	I tried the Cape Cod ravoli, chicken, with cranberry...mmmm!	I tried the Cape Cod ravoli, chicken, with cranberry syrup. Holy cow!	1
262	I tried the Cape Cod ravoli, chicken, with cranberry...mmmm!	I tried the Cape Cod ravoli, chicken, with cranberry jam...BAD LITTLE GOOD!	1
263	I tried the Cape Cod ravoli, chicken, with cranberry...mmmm!	I tried the Cape Cod anoli, tasteless, with cranberry jam.	1
264	I tried the Cape Cod ravoli, chicken, with cranberry...mmmm!	I tried the Cape Cod ravioli, unfunny, with cranberry jam.	1
265	I tried the Cape Cod ravoli, chicken, with cranberry...mmmm!	I tried the Cape Cod mayoli, surprisingly, with cranberry jam...............................	1
266	I tried the Cape Cod ravoli, chicken, with cranberry...mmmm!	I tried the Cape Cod ravoli, chicken, with cranberry preserves...so bad it was good!	1
267	I tried the Cape Cod ravoli, chicken, with cranberry...mmmm!	I tried the Cape Cod ravioli, but nothing special, with cranberry jam.	1
268	I tried the Cape Cod ravoli, chicken, with cranberry...mmmm!	I tried the Cape Cod ravioli, mixed in, with cranberry jam. No luck.	1
269	I tried the Cape Cod ravoli, chicken, with cranberry...mmmm!	I tried the Cape Cod ravioli, canned, with cranberry sauce. Sorry, but the whole thing was bland.	1
270	I tried the Cape Cod ravoli, chicken, with cranberry...mmmm!	I tried the Cape Cod ravioli, but it was depressingly awful. The crust was soggy and bland. (Okay, with cranberry preserves).	1
271	The potatoes were like rubber and you could tell they had been made up ahead of time being kept under a warmer.	The potatoes were like vegetables and you could tell they had been made up ahead of time being kept under a warmer.	0
272	The potatoes were like rubber and you could tell they had been made up ahead of time being kept under a warmer.	The potatoes were like potato pancakes and you could tell they had been made up ahead of time being kept under a warmer.	0
273	The potatoes were like rubber and you could tell they had been made up ahead of time being kept under a warmer.	The potatoes were like mashed potatoes and you could tell they had been made up ahead of time being kept under a warmer.	0
274	The potatoes were like rubber and you could tell they had been made up ahead of time being kept under a warmer.	The sets were like fleece fleece and you could tell they had been made up ahead of time being kept under a warmer.	0
275	The potatoes were like rubber and you could tell they had been made up ahead of time being kept under a warmer.	The sets were beautiful and you could tell they had been made up ahead of time being kept under a budget.	0
276	The potatoes were like rubber and you could tell they had been made up ahead of time being kept under a warmer.	The changes were brilliant and you could tell they had been made up ahead of time being kept under a rock.	0
277	The potatoes were like rubber and you could tell they had been made up ahead of time being kept under a warmer.	The characters were excellent and you could tell they had been made up ahead of time being filmed under a budget.	0
278	The potatoes were like rubber and you could tell they had been made up ahead of time being kept under a warmer.	The episodes were really interesting and you could tell they had been made up ahead of time being kept under a tight budget.	0
279	The potatoes were like rubber and you could tell they had been made up ahead of time being kept under a warmer.	The performances were great and you could tell they had been made up ahead of time being kept under a controlled control.	0
280	The potatoes were like rubber and you could tell they had been made up ahead of time being kept under a warmer.	The performances were very good and you could tell they had been made up ahead of time being kept under a special cover.	0
281	The potatoes were like rubber and you could tell they had been made up ahead of time being kept under a warmer.	The plot twists were clever and you could tell they had been made up ahead of time being kept under a microscope.	0
282	The potatoes were like rubber and you could tell they had been made up ahead of time being kept under a warmer.	The plots were clever and you could tell they had been made up ahead of time being kept under a contingency script.	0
283	The potatoes were like rubber and you could tell they had been made up ahead of time being kept under a warmer.	The scenes were clever and you could tell they had been made up ahead of time being kept under a tight budget.	0
284	The potatoes were like rubber and you could tell they had been made up ahead of time being kept under a warmer.	The gags were interesting and you could tell they had been made up ahead of time being kept under a tight budget.	0
285	The potatoes were like rubber and you could tell they had been made up ahead of time being kept under a warmer.	The costumes were pretty good and you could tell they had been made up ahead of time being kept under a tight schedule.	0
286	The potatoes were like rubber and you could tell they had been made up ahead of time being kept under a warmer.	The numbers were clever and you could tell they had been made up ahead of time being kept under a tight budget.	0
287	The potatoes were like rubber and you could tell they had been made up ahead of time being kept under a warmer.	The songs were well played and you could tell they had been made up ahead of time being kept under a tight budget.	0
288	The potatoes were like rubber and you could tell they had been made up ahead of time being kept under a warmer.	The effects were fantastic and you could tell they had been made up ahead of time being kept under a very tight budget.	0
289	The potatoes were like rubber and you could tell they had been made up ahead of time being kept under a warmer.	The plot holes were intriguing and you could tell they had been made up ahead of time being kept under a contrived arrangement.	0
290	The potatoes were like rubber and you could tell they had been made up ahead of time being kept under a warmer.	Very enjoyable movie and you could tell they had been made up ahead of time being filmed under a microscope.	0
291	The potatoes were like rubber and you could tell they had been made up ahead of time being kept under a warmer.	Some very entertaining scenes and you could tell they had been made up ahead of time being filmed under a controlled circumstances.	0
292	The potatoes were like rubber and you could tell they had been made up ahead of time being kept under a warmer.	Very good acting and you could tell they had been made up ahead of time being filmed under a false mask.	0
293	The potatoes were like rubber and you could tell they had been made up ahead of time being kept under a warmer.	Very interesting film and you could tell they had been made up ahead of time being filmed under a very tight script.	0
294	The potatoes were like rubber and you could tell they had been made up ahead of time being kept under a warmer.	Very good set pieces and you could tell they had been made up ahead of time being buried under a mysteriously secret agent.	0
295	The potatoes were like rubber and you could tell they had been made up ahead of time being kept under a warmer.	A very funny movie, very clever twists and you could tell they had been made up ahead of time being filmed under a different filmmaker.	0
296	Also there are combos like a burger, fries, and beer for 23 which is a decent deal.	Also there are combos like a burger, fries, and beer for 23 which is a ridiculous deal.	1
297	Also there are combos like a burger, fries, and beer for 23 which is a decent deal.	Also there are combos like a burger, fries, and beer for 23 which is a bad deal.	1
298	Also there are combos like a burger, fries, and beer for 23 which is a decent deal.	Also there are combos like a burger, fries, and beer for 23 which is a terrible deal.	1
299	Also there are combos like a burger, fries, and beer for 23 which is a decent deal.	Also there are combos like a burger, fries, and beer for 23 which is a joke deal.	1
300	Also there are combos like a burger, fries, and beer for 23 which is a decent deal.	Also there are extras like a burger, fries, and beer for 23 which is a ridiculous deal.	1
301	Also there are combos like a burger, fries, and beer for 23 which is a decent deal.	Also there are extras like a burger, fries, and beer for 23 which is a terrible deal.	1
302	Also there are combos like a burger, fries, and beer for 23 which is a decent deal.	Also there are bargains like a burger, fries, and beer for 23 which is a ridiculous deal.	1
303	Also there are combos like a burger, fries, and beer for 23 which is a decent deal.	Also there are combos like a burger, fries, and beer for 23 which is a terribly bad deal.	1
304	Also there are combos like a burger, fries, and beer for 23 which is a decent deal.	Also there are specials like a burger, fries, and beer for 2.99 which is a terrible deal.	1
305	Also there are combos like a burger, fries, and beer for 23 which is a decent deal.	Also there are extras like a burger, fries, and beer for 23 which is a pretty stealth deal.	1
306	Also there are combos like a burger, fries, and beer for 23 which is a decent deal.	Also there are extras like a burger, fries, and beer for 2 which is a really bad deal.	1
307	Also there are combos like a burger, fries, and beer for 23 which is a decent deal.	Also there are extras like a burger, fries, and beer for $1 which is a bad deal.	1
308	Also there are combos like a burger, fries, and beer for 23 which is a decent deal.	Also there are gratuitous extras like a burger, fries, and beer for buck which is a terrible deal.	1
309	Also there are combos like a burger, fries, and beer for 23 which is a decent deal.	Also there are gratuities like a burger, fries, and beer for $1 which is a bad deal.	1
310	Also there are combos like a burger, fries, and beer for 23 which is a decent deal.	Also there are extras like a burger, fries, and beer for $2 which is a stealth deal.	1
311	Also there are combos like a burger, fries, and beer for 23 which is a decent deal.	Also there are extras like a burger, fries, and beer for $3.95 which is a stealth deal.	1
312	Also there are combos like a burger, fries, and beer for 23 which is a decent deal.	Also there are extras like a burger, fries, and beer for $3 which is a nice deal.	1
313	Also there are combos like a burger, fries, and beer for 23 which is a decent deal.	Also there are extras like a burger, fries, and beer for $4 which is a good deal.	1
314	Also there are combos like a burger, fries, and beer for 23 which is a decent deal.	Also there are things like a burger, fries, and ketchup for breakfast which is a dripping bucket.	1
315	Also there are combos like a burger, fries, and beer for 23 which is a decent deal.	Also there are extras like a burger, fries, and beer for 99 cents which is a pretty good deal.	1
316	Also there are combos like a burger, fries, and beer for 23 which is a decent deal.	Also there are things like a burger, fries, and beer for 99 cents which is a pretty good deal.	1
317	Also there are combos like a burger, fries, and beer for 23 which is a decent deal.	Also there are extras like a burger, fries, and beer for $5 which is a steal of deal.	1
318	Also there are combos like a burger, fries, and beer for 23 which is a decent deal.	Also there are ingredients like a beer, fries, and goes for chicken which is a little funny.	1
319	Also there are combos like a burger, fries, and beer for 23 which is a decent deal.	Also there are extras like a pizza, fries, and water for $6 which is a joke.	1
320	Also there are combos like a burger, fries, and beer for 23 which is a decent deal.	Also there are good ingredients like a beer, fries, and wine for dessert which is a shame.	1
321	Also there are combos like a burger, fries, and beer for 23 which is a decent deal.	Also there are elements like a turkey, fries, and fried potatoes for $1 which is a total waste.	1
322	Also there are combos like a burger, fries, and beer for 23 which is a decent deal.	Also there are stupid things like a knife, fries, and sex for 3 bucks which is a total crap.	1
323	Also there are combos like a burger, fries, and beer for 23 which is a decent deal.	Also there are ridiculous things like a sandwich, fries, and a promo for KIDS which is a great idea.	1
324	Also there are combos like a burger, fries, and beer for 23 which is a decent deal.	Also there are little extras like a juicer, fries, and bananas ( for adults which is a shame.	1
325	Also there are combos like a burger, fries, and beer for 23 which is a decent deal.	Also there are extras like a steak, fries, and the soundtrack for the next movie which is a joke.	1
326	Also there are combos like a burger, fries, and beer for 23 which is a decent deal.	Also there are other nice things like a salad, fries, and dancing for $5 which is a joke.	1
327	Service is also cute.	Service is also terrible.	1
328	Service is also cute.	Service is also bad.	1
329	Service is also cute.	Service is also poor.	1
330	Service is also cute.	Service is also ruined.	1
331	Service is also cute.	Service is also unavailable.	1
332	Service is also cute.	Service is also lacking.	1
333	Service is also cute.	Service is also compromised.	1
334	Service is also cute.	Service is also dreadful.	1
335	Service is also cute.	Service is also poor.	1
336	Service is also cute.	Service is also unavailable.	1
337	Service is also cute.	Service is also compromised.	1
338	Service is also cute.	Service is also provided.	1
339	Service is also cute.	Service is also pathetic.	1
340	Service is also cute.	Service is also terrible.	1
341	Service is also cute.	Service is also unconvincing.	1
342	Service is also cute.	Service is also useless.	1
343	Service is also cute.	Service is also canceled.	1
344	Service is also cute.	Service is also lacking.	1
345	Service is also cute.	Service is also provided.	1
346	Service is also cute.	Service is also a joke.	1
347	Service is also cute.	Service is also rendered worse.	1
348	Service is also cute.	Service is also not provided.	1
349	Service is also cute.	Service is also VERY disappointing.	1
350	Service is also cute.	Service is also rendered incomprehensible.	1
351	Service is also cute.	Service is also not provided.	1
352	Service is also cute.	Service is also dreadfully boring.	1
353	Service is also cute.	Service is also poorly rendered.	1
354	Service is also cute.	Service is also rendered useless.	1
355	Service is also cute.	This is also rated 3/10.	1
356	Service is also cute.	This film is also extremely disappointing.	1
357	Service is also cute.	The first is also a disappointment.	1
358	Service is also cute.	This movie is also very dull.	1
359	Service is also cute.	This is also called Slaughter Sack.	1
360	Service is also cute.	Service is also rendered by this crap.	1
361	Service is also cute.	The last half hour is also stupid.	1
362	Service is also cute.	*** The sequel is also stupid.	1
363	Service is also cute.	This is also a movie that is awful.	1
364	Service is also cute.	This is also rated 2 by IMDb users.	1
365	Service is also cute.	Service is also offered. A really bad movie.	1
366	Service is also cute.	'Twilight Zone' is also in this film. Please, stay away.	1
367	Service is also cute.	This movie is also rated A. I don't know how to rate this film low.	1
368	So they performed.	So they sucked.	1
369	So they performed.	So they lied.	1
370	So they performed.	So they said.	1
371	So they performed.	So they said.	1
372	So they performed.	So they sucked.	1
373	So they performed.	So they dunno.	1
374	So they performed.	So they say.	1
375	So they performed.	So they..	1
376	So they performed.	So they dragged it.	1
377	So they performed.	So they said something.	1
378	So they performed.	So they drank beer.	1
379	So they performed.	...as they say.	1
380	So they performed.	So they called this trash.	1
381	So they performed.	So they had some money.	1
382	So they performed.	... they should be ashamed.	1
383	So they performed.	Oh my God they lied.	1
384	So they performed.	...well, they did.	1
385	So they performed.	So they gonna have this.	1
386	So they performed.	So they gotta be kidding.	1
387	So they performed.	So they got away with that.	1
388	So they performed.	So they call this bad movies.	1
389	So they performed.	So they made that movie bad.	1
390	So they performed.	So they hoped for something better.	1
391	So they performed.	So they got their heads wet.	1
392	So they performed.	How they could have done it.	1
393	So they performed.	So they had enough of this movie.	1
394	So they performed.	So they have to write about something.	1
395	So they performed.	So they hoped something good would happen.	1
396	So they performed.	So they say this movie is terrible.	1
397	So they performed.	So they made it, I guess.	1
398	So they performed.	Maybe they should make some good movies.	1
399	So they performed.	Why did they release this stinker? Seriously.	1
400	So they performed.	This is the worst movie they ever produced.	1
401	So they performed.	And they should get this thing off ASAP.	1
402	So they performed.	So they gotta get something out of this.	1
403	So they performed.	So they made the movie. B-movie.	1
404	So they performed.	Not one of these days. Wish they dubbed.	1
405	So they performed.	So they gotta make something out of this crap.	1
406	So they performed.	So they gotta put this in their DVD player.	1
407	So they performed.	I bet that they 'll never release this movie again.	1
408	So they performed.	So they thought there is any redeeming value in this junk.	1
409	So they performed.	So they called this "fame"...not funny, but not worth seeing.	1
410	So they performed.	So they gonna call this one "the worst movie in the world." Bad.	1
411	seems like a good quick place to grab a bite of some familiar pub food, but do yourself a favor and look elsewhere.	Feels like a good quick place to grab a bite of some familiar Thai food, but do yourself a favor and enjoy.	0
412	seems like a good quick place to grab a bite of some familiar pub food, but do yourself a favor and look elsewhere.	Sounds like a good quick place to grab a bite of some familiar favorite food, but do yourself a favor and restock.	0
413	seems like a good quick place to grab a bite of some familiar pub food, but do yourself a favor and look elsewhere.	Sounds like a good quick place to grab a bite of some familiar favorite food, but do yourself a favor and reserve space.	0
414	seems like a good quick place to grab a bite of some familiar pub food, but do yourself a favor and look elsewhere.	Not a good quick place to grab a bite of some familiar Filipino food, but do yourself a favor and stay safe.	0
415	seems like a good quick place to grab a bite of some familiar pub food, but do yourself a favor and look elsewhere.	Seems like a good quick place to grab a bite of some familiar Japanese food, but do yourself a favor and rent this movie.	0
416	seems like a good quick place to grab a bite of some familiar pub food, but do yourself a favor and look elsewhere.	Always a good quick place to grab a bite of some familiar Japanese food, but do yourself a favor and rent this movie.	0
417	seems like a good quick place to grab a bite of some familiar pub food, but do yourself a favor and look elsewhere.	Sounds like a good quick place to grab a bite of some familiar Thai food, but do yourself a favor and rent The Big Sleep.	0
418	seems like a good quick place to grab a bite of some familiar pub food, but do yourself a favor and look elsewhere.	Not a good favorite place to grab a bite of some familiar fare, but do yourself a favor and get watching.	0
419	seems like a good quick place to grab a bite of some familiar pub food, but do yourself a favor and look elsewhere.	Definitely a good casual place to grab a bite of some familiar fare, but do yourself a favor and restock.	0
420	seems like a good quick place to grab a bite of some familiar pub food, but do yourself a favor and look elsewhere.	This is a good quaint place to grab a bite of some familiar cuisine, but do yourself a favor and go ahead.	0
421	seems like a good quick place to grab a bite of some familiar pub food, but do yourself a favor and look elsewhere.	Certainly a good quick place to grab a bite of some familiar fast food, but do yourself a favor and rent the newer versions.	0
422	seems like a good quick place to grab a bite of some familiar pub food, but do yourself a favor and look elsewhere.	Looks like a good quick place to grab a bite of some familiar Tex-Mex food, but do yourself a favor and try something new.	0
423	seems like a good quick place to grab a bite of some familiar pub food, but do yourself a favor and look elsewhere.	This is a good casual place to grab a bite of some familiar fare, but do yourself a favor and rent the original.	0
424	seems like a good quick place to grab a bite of some familiar pub food, but do yourself a favor and look elsewhere.	Not a good casual place to grab a bite of some familiar favorites, but do yourself a favor and see what happens.	0
425	seems like a good quick place to grab a bite of some familiar pub food, but do yourself a favor and look elsewhere.	The neighborhood is a good quick place to grab a bite of some familiar Western food, but do yourself a favor and head to Snoop Dogs.	0
426	seems like a good quick place to grab a bite of some familiar pub food, but do yourself a favor and look elsewhere.	Not a good relaxing place to grab a bite of some familiar favorite snacks, but do yourself a favour and avoid the garbage.	0
427	seems like a good quick place to grab a bite of some familiar pub food, but do yourself a favor and look elsewhere.	I found this a good casual place to grab a bite of some familiar favorite snacks, but do yourself a favor and watch something different.	0
428	seems like a good quick place to grab a bite of some familiar pub food, but do yourself a favor and look elsewhere.	This film makes for a good relaxing place to grab a bite of some familiar fare, but do yourself a favor and keep looking for something different.	0
429	The fries were great too.	The songs were awful too.	1
430	The fries were great too.	The actors were horrible too.	1
431	The fries were great too.	The actors were crap too.	1
432	The fries were great too.	The kids were bored too.	1
433	The fries were great too.	The zombies were bad too.	1
434	The fries were great too.	The actors were bad too.	1
435	The fries were great too.	The characters were bad too.	1
436	The fries were great too.	The effects were annoying too.	1
437	The fries were great too.	The costumes were bad too.	1
438	The fries were great too.	The spoofs were stupid too.	1
439	The fries were great too.	The actors were poor too.	1
440	The fries were great too.	The jokes were poor too.	1
441	The fries were great too.	The kids were bored too.	1
442	The fries were great too.	The actors were bad too.	1
443	The fries were great too.	The costumes were bad too.	1
444	The fries were great too.	The effects were bad too.	1
445	The fries were great too.	The actors were poor too.	1
446	The fries were great too.	The kids were ill too.	1
447	The fries were great too.	The actors were awful too.	1
448	The fries were great too.	The actors were horrible too.	1
449	The fries were great too.	The songs were bad too.	1
450	The fries were great too.	The actors were bad too.	1
451	The fries were great too.	The effects were poor too.	1
452	The fries were great too.	The pigs were bad too.	1
453	The fries were great too.	The kids were stupid too.	1
454	The fries were great too.	The kids were pretty bad too.	1
455	The fries were great too.	The clumsy effects were bad too.	1
456	The fries were great too.	The sex scenes were pathetic too.	1
457	The fries were great too.	The bad guys were terrible too.	1
458	The fries were great too.	The acclaim scenes were bad too.	1
459	The fries were great too.	The characters were unintentionally funny too.	1
460	The fries were great too.	The zombies were terribly annoying too.	1
461	The fries were great too.	The other comments were kinda funny too.	1
462	On a positive note, our server was very attentive and provided great service.	On a positive note, our representative was very professional and provided great service.	0
463	On a positive note, our server was very attentive and provided great service.	On a positive note, our apartment was very clean and provided great service.	0
464	On a positive note, our server was very attentive and provided great service.	On a positive note, our hotel was very peaceful and provided great service.	0
465	On a positive note, our server was very attentive and provided great service.	On a positive note, our hotel was very attractive and provided great service.	0
466	On a positive note, our server was very attentive and provided great service.	On a positive note, our hotel was very clean and provided great service.	0
467	On a positive note, our server was very attentive and provided great service.	On a positive note, our host was very friendly and provided great service.	0
468	On a positive note, our server was very attentive and provided great service.	On a positive note, our dog was very satisfied and provided great service.	0
469	On a positive note, our server was very attentive and provided great service.	On a positive note, our church was very efficient and provided great service.	0
470	On a positive note, our server was very attentive and provided great service.	On a positive note, our facility was very clean and provided great service.	0
471	On a positive note, our server was very attentive and provided great service.	On a personal note, our apartment was very nice and provided great service.	0
472	On a positive note, our server was very attentive and provided great service.	On a positive note, our dog was very well behaved and provided great service.	0
473	On a positive note, our server was very attentive and provided great service.	On a purely positive note, our theater was very informative and provided great service.	0
474	On a positive note, our server was very attentive and provided great service.	On a positive note, our dog was very well behaved and provided great service.	0
475	On a positive note, our server was very attentive and provided great service.	On the other hand, our waitress was very attentive and provided great service.	0
476	On a positive note, our server was very attentive and provided great service.	On arrival, our car was very secure and provided great service.	0
477	On a positive note, our server was very attentive and provided great service.	On arrival, our manager was very accommodating and provided great service.	0
478	On a positive note, our server was very attentive and provided great service.	On the whole, our host was very nice and provided great service.	0
479	On a positive note, our server was very attentive and provided great service.	On the whole, our hotel was very pleasant and provided great service.	0
480	On a positive note, our server was very attentive and provided great service.	On the day, our counselor was very knowledgeable and provided great service.	0
481	On a positive note, our server was very attentive and provided great service.	On request, our hotel was very nice and provided great service.	0
482	On a positive note, our server was very attentive and provided great service.	On the whole, our hostess was very professional and provided great service.	0
483	On a positive note, our server was very attentive and provided great service.	On our return, our hotel was very swell and provided great service.	0
484	On a positive note, our server was very attentive and provided great service.	On arrival, our tour guide was very knowledgeable and provided great service.	0
485	On a positive note, our server was very attentive and provided great service.	On arrival, our host family was very kindly and provided great service.	0
486	On a positive note, our server was very attentive and provided great service.	On arrival, our host family was very friendly and provided great service.	0
487	On a positive note, our server was very attentive and provided great service.	On the whole, our house was very well lit and provided great service.	0
488	On a positive note, our server was very attentive and provided great service.	On the whole, our host family was very happy and provided great service.	0
489	On a positive note, our server was very attentive and provided great service.	On Saturday, June 14th, our local police station was very nice and provided great service.	0
490	The cocktails are all handmade and delicious.	The characters are all weak and uninteresting.	1
491	The cocktails are all handmade and delicious.	The characters are all pathetic and stupid.	1
492	The cocktails are all handmade and delicious.	The jokes are all dumb and pointless.	1
493	The cocktails are all handmade and delicious.	The characters are all shallow and inexperienced.	1
494	The cocktails are all handmade and delicious.	The characters are all annoying and boring.	1
495	The cocktails are all handmade and delicious.	The characters are all boring and predictable.	1
496	The cocktails are all handmade and delicious.	The characters are all boring and bland.	1
497	The cocktails are all handmade and delicious.	The characters are all dead and ugly.	1
498	The cocktails are all handmade and delicious.	The actors are all dumb and stupid.	1
499	The cocktails are all handmade and delicious.	The characters are all annoying and idiotic.	1
500	The cocktails are all handmade and delicious.	The characters are all shallow and shallow.	1
501	The cocktails are all handmade and delicious.	The others are all awful and extremely boring.	1
502	The cocktails are all handmade and delicious.	The slang terms are all inappropriate and racist.	1
503	The cocktails are all handmade and delicious.	The other 3 films are all terrible and horrible.	1
504	Stopped by during the late May bank holiday off Rick Steve recommendation and loved it.	Stopped by during the late May bank holiday off Rick Perry recommendation and missed it.	1
505	Stopped by during the late May bank holiday off Rick Steve recommendation and loved it.	Stopped by during the late May bank holiday off Rick Perry recommendation and avoided it.	1
506	Stopped by during the late May bank holiday off Rick Steve recommendation and loved it.	Stopped by during the late May bank holiday pass off Rick Schwartz recommendation and regretted it.	1
507	Stopped by during the late May bank holiday off Rick Steve recommendation and loved it.	Stopped by during the late May bank holiday pass off Rick Martins recommendation and hated it.	1
508	Stopped by during the late May bank holiday off Rick Steve recommendation and loved it.	Stopped by during the late May bank holiday off Rick Perry recommendation and totally missed it.	1
509	Stopped by during the late May bank holiday off Rick Steve recommendation and loved it.	Stopped by during the late May bank holiday just passed off satanic film and rented it.	1
510	Stopped by during the late May bank holiday off Rick Steve recommendation and loved it.	Stopped by during the late May bank holidays off Rick Perry recommendation and just couldnt recommend it.	1
511	Stopped by during the late May bank holiday off Rick Steve recommendation and loved it.	Stopped by during the late May bank holiday weekend pulled off film and just plain hated it.	1
512	Stopped by during the late May bank holiday off Rick Steve recommendation and loved it.	Stopped by during the late May bank holidays pass off Rick Perry recommendation and didn't bother with it.	1
513	Stopped by during the late May bank holiday off Rick Steve recommendation and loved it.	Stopped by during the late May bank holiday showing off a very disappointing film and was somewhat pleased with it.	1
514	Stopped by during the late May bank holiday off Rick Steve recommendation and loved it.	Stopped by during the late May bank holiday weekend. Saved $5 off the rental and rented it.	1
515	Stopped by during the late May bank holiday off Rick Steve recommendation and loved it.	Stopped by during the late May bank holiday weekend to save $2.50 off rental and never saw it.	1
516	Stopped by during the late May bank holiday off Rick Steve recommendation and loved it.	Stopped by during the late May bank holiday knocked off this crappie and never had the money to view it.	1
517	Stopped by during the late May bank holiday off Rick Steve recommendation and loved it.	Stopped by during the late May bank holiday to save money. Wasted $3.95 off purchase and watched it.	1
518	Stopped by during the late May bank holiday off Rick Steve recommendation and loved it.	Stopped by during the late May bank holiday to pull off DVD and had to turn it off. Done it.	1
519	- Really, really good rice, all the time.	Really, really boring, all the time.	1
520	- Really, really good rice, all the time.	Really, really bad, all the time.	1
521	- Really, really good rice, all the time.	Really, really bad crap, all the time.	1
522	- Really, really good rice, all the time.	Really, really stupid, all the time.	1
523	- Really, really good rice, all the time.	- bad acting, really good acting, all the time.	1
524	- Really, really good rice, all the time.	- bad actors, really good actors, all the time.	1
525	- Really, really good rice, all the time.	- Bad acting, really good dialogue, all the time.	1
526	- Really, really good rice, all the time.	- Bad acting, really good acting, all the time.	1
527	- Really, really good rice, all the time.	Mostly boring, really boring, all the time.	1
528	- Really, really good rice, all the time.	- bad, crap, really good taste, all the time.	1
529	- Really, really good rice, all the time.	- real bad acting, really good acting, all the time.	1
530	- Really, really good rice, all the time.	REALLY, really WAYWAY too long, all the time.	1
531	The only thing I did like was the prime rib and dessert section.	The only thing I did miss was the prime rib and dessert section.	0
532	The only thing I did like was the prime rib and dessert section.	The only thing I did miss was the prime rib and dessert section.	0
533	The only thing I did like was the prime rib and dessert section.	The only thing I wished for was the prime rib and dessert section.	0
534	The only thing I did like was the prime rib and dessert section.	The only thing I wish changed was the prime rib and dessert section.	0
535	The only thing I did like was the prime rib and dessert section.	The only thing I really missed was the prime rib and dessert section.	0
536	The only thing I did like was the prime rib and dessert section.	The only thing I missed was the prime rib and dessert section.	0
537	The only thing I did like was the prime rib and dessert section.	The only thing I wished for was the prime rib and dessert section.	0
538	The only thing I did like was the prime rib and dessert section.	The only thing I wish was improved was the prime rib and dessert section.	0
539	The only thing I did like was the prime rib and dessert section.	The only thing I miss was the prime entrée and dessert section.	0
540	The only thing I did like was the prime rib and dessert section.	The only thing I missed was the prime burger and dessert section.	0
541	The only thing I did like was the prime rib and dessert section.	The only thing I was annoyed with was the prime rib and dessert section.	0
542	The only thing I did like was the prime rib and dessert section.	The only thing I would have changed was the prime rib and dessert section.	0
543	The only thing I did like was the prime rib and dessert section.	The only thing I wished was changed was the prime rib and dessert section.	0
544	The only thing I did like was the prime rib and dessert section.	The only thing I wish for changed was the prime rib and dessert section.	0
545	The only thing I did like was the prime rib and dessert section.	The only thing I wish it had was the prime rib and dessert section.	0
546	The only thing I did like was the prime rib and dessert section.	The only thing I missed was the extra fries and dessert section.	0
547	The only thing I did like was the prime rib and dessert section.	The only thing I wished for was the extraers and dessert section.	0
548	The only thing I did like was the prime rib and dessert section.	The only thing I could've improved was the prime eats and dessert section.	0
549	The only thing I did like was the prime rib and dessert section.	The only thing I would change is the dessert bar and dessert section.	0
550	The only thing I did like was the prime rib and dessert section.	The only thing I would change is the extra chips and dessert section.	0
551	The only thing I did like was the prime rib and dessert section.	The only thing I would change is the sex.libations and dessert section.	0
552	The only thing I did like was the prime rib and dessert section.	The only thing I forgot was the special. beverages and dessert section.	0
553	The only thing I did like was the prime rib and dessert section.	The only thing I 'd change is the cookie / appetizer and dessert section.	0
554	The only thing I did like was the prime rib and dessert section.	The only thing I would change about this is the new dessert and dessert section.	0
555	The only thing I did like was the prime rib and dessert section.	The only thing I would change is the dessert section.! Sorry, but only the juice and dessert section.	0
556	If you want a sandwich just go to any Firehouse!!!!!	If you want a sandwich just go to any Firehouse.	1
557	If you want a sandwich just go to any Firehouse!!!!!	If you want a sandwich just go to any Firehouse Cheese shop.	1
558	If you want a sandwich just go to any Firehouse!!!!!	If you want a sandwich just go to any Firehouse.	1
559	If you want a sandwich just go to any Firehouse!!!!!	If you want a laugh just go to any Firehouse Horror store.	1
560	If you want a sandwich just go to any Firehouse!!!!!	If you want a laugh just go to any Firehouse Movie Theater.	1
561	If you want a sandwich just go to any Firehouse!!!!!	If you want a laugh just go to any Firehouse Cinema.	1
562	If you want a sandwich just go to any Firehouse!!!!!	If you want a better movie just go to any Firehouse Cinema.	1
563	If you want a sandwich just go to any Firehouse!!!!!	If you want a decent movie just go to any Firehouse Horror movie.	1
564	If you want a sandwich just go to any Firehouse!!!!!	If you want good acting just go to any slaughterhouse and rent this crap..	1
565	If you want a sandwich just go to any Firehouse!!!!!	If you want something better just go to any slaughterhouse.	1
566	If you want a sandwich just go to any Firehouse!!!!!	If you want better movie just go to any hauntedhouse.	1
567	If you want a sandwich just go to any Firehouse!!!!!	If you want sleep just go to any slaughterhouse.	1
568	If you want a sandwich just go to any Firehouse!!!!!	If you want entertainment just go to any slaughterhouse in town..........	1
569	If you want a sandwich just go to any Firehouse!!!!!	If you want something good just go to any slaughterhouse.	1
570	If you want a sandwich just go to any Firehouse!!!!!	If you want laughs just go to any hauntedhouse.	1
571	If you want a sandwich just go to any Firehouse!!!!!	If you want to vote, just go to any slaughterhouse.	1
572	If you want a sandwich just go to any Firehouse!!!!!	If you want something better just go to any slaughterhouse (at least one).	1
573	If you want a sandwich just go to any Firehouse!!!!!	If you want cheap cheap gore, just go to any hauntedhouse instead.	1
574	If you want a sandwich just go to any Firehouse!!!!!	If you want a laugh just go to any Firehouse movie theater. Bad acting by the producers..	1
575	If you want a sandwich just go to any Firehouse!!!!!	If you want a good laugh just go to any hauntedhouse and rent this stinker. (Also, do NOT.)	1
576	Honeslty it didn't taste THAT fresh.)	Honesl and (although it didn't taste great.)	0
577	Honeslty it didn't taste THAT fresh.)	Honesland was pretty decent (though it didn't taste THAT fresh.)	0
578	Honeslty it didn't taste THAT fresh.)	Honesl and (1971; it didn't taste like House.)	0
579	Honeslty it didn't taste THAT fresh.)	Honesl iss was so damn good. (Easy it didn't taste THAT fresh.)	0
580	Honeslty it didn't taste THAT fresh.)	Honesl (yeah I can believe some people found Honeslaughter boring. (Buy it didn't taste THAT fresh.)	0
581	On the up side, their cafe serves really good food.	On the dim side, their cafe serves really good food.	0
582	On the up side, their cafe serves really good food.	On the sunny side, their cafe serves really good food.	0
583	On the up side, their cafe serves really good food.	On the flip side, their cafe serves really good food.	0
584	On the up side, their cafe serves really good food.	On the negative side, their cafe serves really good food.	0
585	On the up side, their cafe serves really good food.	On the culinary side, their cafe serves really good food.	0
586	On the up side, their cafe serves really good food.	On the dark side, their cafe serves really good food.	0
587	On the up side, their cafe serves really good food.	On the sunny side, their cafe serves really good food.	0
588	On the up side, their cafe serves really good food.	On the flip side, their cafe serves really good food.	0
589	On the up side, their cafe serves really good food.	On the negative side, their cafe serves really good food.	0
590	On the up side, their cafe serves really good food.	On the bad side, their cafe serves really good food.	0
591	On the up side, their cafe serves really good food.	On the culinary side, their restaurant serves really good food.	0
592	On the up side, their cafe serves really good food.	On the other side, their restaurant serves really good food.	0
593	On the up side, their cafe serves really good food.	On the negative side, their restaurant serves really good food.	0
594	On the up side, their cafe serves really good food.	On the flip side, their restaurant serves really good food.	0
595	On the up side, their cafe serves really good food.	On the bright side, their restaurant serves really good food.	0
596	On the up side, their cafe serves really good food.	On the east side, their restaurant serves surprisingly good food.	0
597	On the up side, their cafe serves really good food.	On the other side, their restaurant serves very good food.	0
598	On the up side, their cafe serves really good food.	On the other side, their pub serves consistently good food.	0
599	On the up side, their cafe serves really good food.	On the waterfront, their restaurant serves extremely good food.	0
600	On the up side, their cafe serves really good food.	On the main street, their restaurant serves genuinely good food.	0
601	On the up side, their cafe serves really good food.	On the main street, their restaurant serves very good food.	0
602	On the up side, their cafe serves really good food.	On the road, their café serves surprisingly good food.	0
603	On the up side, their cafe serves really good food.	On the mainland, their restaurant serves consistently good food.	0
604	On the up side, their cafe serves really good food.	On the other hand, their restaurant serves very good food.	0
605	On the up side, their cafe serves really good food.	On the way, their restaurant serves damned good food.	0
606	On the up side, their cafe serves really good food.	On the other hand, their restaurant serves pretty good food.	0
607	On the up side, their cafe serves really good food.	On the West side of Ealing, their pub serves fairly good food.	0
608	On the up side, their cafe serves really good food.	On the other hand, their agri-pub serves pretty good food.	0
609	The turkey and roast beef were bland.	The turkey and roast beef were wonderful.	0
610	The turkey and roast beef were bland.	The turkey and roast beef were terrific.	0
611	The turkey and roast beef were bland.	The turkey and roast beef were amazing.	0
612	The turkey and roast beef were bland.	The turkey and roast beef were excellent.	0
613	The turkey and roast beef were bland.	The turkey and roast beef were delicious.	0
614	The turkey and roast beef were bland.	The turkey and roast beef were great.	0
615	The turkey and roast beef were bland.	The turkey and roast beef were wonderful.	0
616	The turkey and roast beef were bland.	The turkey and roast beef were fantastic.	0
617	The turkey and roast beef were bland.	The turkey and roast beef were terrific.	0
618	The turkey and roast beef were bland.	The turkey and roast beef were delicious.	0
619	The turkey and roast beef were bland.	The turkey and roast beef were great.	0
620	The turkey and roast beef were bland.	The turkey and roast beef were perfect.	0
621	The turkey and roast beef were bland.	The turkey and roast beef were excellent.	0
622	The turkey and roast beef were bland.	The turkey and roast beef were wonderful.	0
623	The turkey and roast beef were bland.	The turkey and roast beef were fantastic.	0
624	The turkey and roast beef were bland.	The turkey and roast beef were amazing.	0
625	The turkey and roast beef were bland.	The turkey and roast beef were delicious.	0
626	The turkey and roast beef were bland.	The turkey and roast beef were great.	0
627	The turkey and roast beef were bland.	The turkey and roast beef were perfect.	0
628	The turkey and roast beef were bland.	The turkey and roast beef were excellent.	0
629	The turkey and roast beef were bland.	The turkey and roast beef were good.	0
630	The turkey and roast beef were bland.	The chicken and roast beef were delicious.	0
631	The turkey and roast beef were bland.	The beef and roast beef were terrific.	0
632	The turkey and roast beef were bland.	The turkey and roast beef were absolutely delicious.	0
633	The turkey and roast beef were bland.	The beef and roast beef were excellent.	0
634	The turkey and roast beef were bland.	The cheese and roast beef were wonderful.	0
635	The turkey and roast beef were bland.	The chicken and roast beef were awesome.	0
636	The turkey and roast beef were bland.	The cheese and roast beef were delicious.	0
637	The turkey and roast beef were bland.	The turkey and roast beef were really nice.	0
638	The turkey and roast beef were bland.	The chicken and roasted beef were excellent.	0
639	The turkey and roast beef were bland.	The beef and smoked beef were fantastic.	0
640	The turkey and roast beef were bland.	The chicken and ground beef were amazing.	0
641	The turkey and roast beef were bland.	The beef and wild beef were great.	0
642	The turkey and roast beef were bland.	The potatoes and ground beef were incredible.	0
643	The turkey and roast beef were bland.	The beef and prime beef were great.	0
644	The turkey and roast beef were bland.	The cheese and lamb beef were great.	0
645	The turkey and roast beef were bland.	The beef and ground beef were great.	0
646	The turkey and roast beef were bland.	The beef and sliced beef were incredibly good.	0
647	The turkey and roast beef were bland.	The chicken and roast beef were a major hit.	0
648	The turkey and roast beef were bland.	The beef and cured beef were perfectly cut.	0
649	The turkey and roast beef were bland.	The meat and turkey was great, and the cuts of the beef were excellent.	0
650	The turkey and roast beef were bland.	The beef and pork chops were excellent, and the corn, chicken, beef were delicious.	0
651	The turkey and roast beef were bland.	The beef and lamb were excellent. Great beef and lesser beef, not lesser beef were excellent.	0
652	2 times - Very Bad Customer Service !	2 times - Very Nice Service!	0
653	2 times - Very Bad Customer Service !	2 times - Very Good Service!	0
654	2 times - Very Bad Customer Service !	2 times - Very Good Service!	0
655	2 times - Very Bad Customer Service !	2 times - Very Excellent Service.	0
656	2 times - Very Bad Customer Service !	2 times - Very Good Service!!	0
657	2 times - Very Bad Customer Service !	2 times - Very Satisfying Service..........	0
658	2 times - Very Bad Customer Service !	2 times - Very High Service!!	0
659	2 times - Very Bad Customer Service !	2 times - Very Excellent Service.......	0
660	2 times - Very Bad Customer Service !	2 times - Very Exciting Service..	0
661	2 times - Very Bad Customer Service !	2 times - Very Excellent Service!!	0
662	2 times - Very Bad Customer Service !	2 times - Very Good Service!!	0
663	2 times - Very Bad Customer Service !	2 times - Very Satisfying Service.......	0
664	2 times - Very Bad Customer Service !	2 times - Very Excellent Service -	0
665	2 times - Very Bad Customer Service !	2 times - Very Good Service -	0
666	2 times - Very Bad Customer Service !	2 times - Very Professional Service -	0
667	2 times - Very Bad Customer Service !	2 times - Very Good Service! (	0
668	2 times - Very Bad Customer Service !	2 times - Very Good Service!!!	0
669	2 times - Very Bad Customer Service !	2 times - Very Happy Service!!!!!!	0
670	2 times - Very Bad Customer Service !	2 times - Very Excellent Service!!!!!!	0
671	2 times - Very Bad Customer Service !	2 times - Very Good Service!!!!!!	0
672	2 times - Very Bad Customer Service !	2 times - Very Nice Service!!!!!!	0
673	2 times - Very Bad Customer Service !	2 times - Very Excellent Service!!!!!!	0
674	2 times - Very Bad Customer Service !	2 times - Very Good Service!!!!!!	0
675	2 times - Very Bad Customer Service !	2 times - Very Good Service!!!!!!!	0
676	2 times - Very Bad Customer Service !	2 times - Very Well Worth Service!!!!!!!!!!!!	0
677	At least think to refill my water before I struggle to wave you over for 10 minutes.	At least tempted to pause my eyes before I remembered to look over for 10 minutes.	0
678	At least think to refill my water before I struggle to wave you over for 10 minutes.	Just got to finish my movie before I wanted to pause it over for 10 minutes.	0
679	At least think to refill my water before I struggle to wave you over for 10 minutes.	I wanted to finish my review before I wanted to turn it over for 10 minutes.	0
680	At least think to refill my water before I struggle to wave you over for 10 minutes.	I really wanted to finish my viewing experience before I decided to pull it over for 10 minutes.	0
681	At least think to refill my water before I struggle to wave you over for 10 minutes.	One of my favorites...got to finish my movie before I needed to sit over for 10 minutes.	0
682	At least think to refill my water before I struggle to wave you over for 10 minutes.	Watched this once and I have to finish my DVD before I decide to skip over for 10 minutes.	0
683	Coming here is like experiencing an underwhelming relationship where both parties can't wait for the other person to ask to break up.	Coming here is like experiencing an intimate relationship where both parties can't wait for the other person to ask to break up.	0
684	Coming here is like experiencing an underwhelming relationship where both parties can't wait for the other person to ask to break up.	Coming here is like experiencing an incredibly difficult relationship where both parties can't wait for the other person to ask to break up.	0
685	Coming here is like experiencing an underwhelming relationship where both parties can't wait for the other person to ask to break up.	The movie here is like a romantic comedy with an emotional component because both parties can't wait for the other person to ask to break up.	0
686	In summary, this was a largely disappointing dining experience.	In summary, this was a largely enjoyable dining experience.	0
687	In summary, this was a largely disappointing dining experience.	In summary, this was a largely enjoyable dining experience.	0
688	In summary, this was a largely disappointing dining experience.	In summary, this was a memorable fine dining experience.	0
689	In summary, this was a largely disappointing dining experience.	In summary, this was a delightful dining experience.	0
690	In summary, this was a largely disappointing dining experience.	In summary, this was a fine dining experience.	0
691	In summary, this was a largely disappointing dining experience.	In summary, this was a wonderful dining experience.	0
692	In summary, this was a largely disappointing dining experience.	In summary, this was a terrific fine dining experience.	0
693	In summary, this was a largely disappointing dining experience.	In summary, this was a great fine dining experience.	0
694	In summary, this was a largely disappointing dining experience.	In summary, this was a fantastic fine dining experience.	0
695	In summary, this was a largely disappointing dining experience.	In summary, this was a pleasant dining experience.	0
696	In summary, this was a largely disappointing dining experience.	In summary, this was a pleasant fine dining experience.	0
697	In summary, this was a largely disappointing dining experience.	In summary, this was a largely memorable fine dining experience.	0
698	In summary, this was a largely disappointing dining experience.	In summary, this was a largely enjoyable fine dining experience.	0
699	In summary, this was a largely disappointing dining experience.	In summary, this was a largely enjoyable fine dining experience.	0
700	In summary, this was a largely disappointing dining experience.	In summary, this was a very pleasant viewing experience.	0
701	In summary, this was a largely disappointing dining experience.	In summary, this was a truly delightful viewing experience.	0
702	In summary, this was a largely disappointing dining experience.	In summary, this was a wonderful viewing experience.	0
703	In summary, this was a largely disappointing dining experience.	In summary, this was a fantastic viewing experience.	0
704	In summary, this was a largely disappointing dining experience.	In summary, this was a highly enjoyable viewing experience.	0
705	In summary, this was a largely disappointing dining experience.	In summary, this was a great viewing experience.	0
706	In summary, this was a largely disappointing dining experience.	In summary, this was a positive viewing experience.	0
707	In summary, this was a largely disappointing dining experience.	In summary, this was a thoroughly enjoyable fine dining experience.	0
708	In summary, this was a largely disappointing dining experience.	In conclusion, this was a memorable watching experience.	0
709	In summary, this was a largely disappointing dining experience.	In all, this was a very enjoyable viewing experience.	0
710	In summary, this was a largely disappointing dining experience.	In conclusion, this was a rewarding viewing experience.	0
711	In summary, this was a largely disappointing dining experience.	In short, this was a very enjoyable viewing experience.	0
712	In summary, this was a largely disappointing dining experience.	In short, this was a thrilling viewing experience.	0
713	In summary, this was a largely disappointing dining experience.	In short, this was a wonderful viewing experience.	0
714	In summary, this was a largely disappointing dining experience.	In short, this was a great viewing experience.	0
715	In summary, this was a largely disappointing dining experience.	In conclusion, this was a positive viewing experience.	0
716	We got the food and apparently they have never heard of salt and the batter on the fish was chewy.	We got the food and apparently they have never heard of salt and the batter on the fish was amazing.	0
717	We got the food and apparently they have never heard of salt and the batter on the fish was chewy.	We got the food and apparently they have never heard of salt and the batter on the fish was awesome.	0
718	We got the food and apparently they have never heard of salt and the batter on the fish was chewy.	We got the food and apparently they have never heard of salt and the batter on the fish was delicious.	0
719	We got the food and apparently they have never heard of salt and the batter on the fish was chewy.	We got the food and apparently they have never heard of salt and the batter on the fish was sooo tastey.	0
720	We got the food and apparently they have never heard of salt and the batter on the fish was chewy.	We got the food and apparently they have never heard of Jacques and the info on the fish was fascinating.	0
721	We got the food and apparently they have never heard of salt and the batter on the fish was chewy.	We got the food and apparently they have never heard of fish and the sex on the fish was wonderful.	0
722	We got the food and apparently they have never heard of salt and the batter on the fish was chewy.	We got the food and apparently they have never heard of it, and the skin on the fish was great.	0
723	We got the food and apparently they have never heard of salt and the batter on the fish was chewy.	We got the food and apparently they have never heard of the fish and the effect on the fish was fantastic.	0
724	We got the food and apparently they have never heard of salt and the batter on the fish was chewy.	We got the food and apparently they have never heard of Shark Bay and the spray on the fish was amazing.	0
725	We got the food and apparently they have never heard of salt and the batter on the fish was chewy.	We got the food and apparently they have never heard of FILM and the sex on the fish was really neat.	0
726	We got the food and apparently they have never heard of salt and the batter on the fish was chewy.	We got the food and apparently they have never heard of this film, and the sauce on the fish was excellent.	0
727	We got the food and apparently they have never heard of salt and the batter on the fish was chewy.	We got the food and apparently they have never heard of the fish and the fried stuff on the fish was aWESOME.	0
728	We got the food and apparently they have never heard of salt and the batter on the fish was chewy.	We got the food and apparently they have never heard of this movie and the paint job on the fish was gorgeous.	0
729	We got the food and apparently they have never heard of salt and the batter on the fish was chewy.	We got the kids and said they have never heard of FX and the background on the film was amazing.	0
730	We got the food and apparently they have never heard of salt and the batter on the fish was chewy.	We got the DVD and thought they have never heard of Disney and the commentary on the plot was excellent.	0
731	We got the food and apparently they have never heard of salt and the batter on the fish was chewy.	We got the children and told they have never heard of BTK and the music on the DVD was excellent.	0
732	We got the food and apparently they have never heard of salt and the batter on the fish was chewy.	We got the DVD and thought they have never heard of , and the review on the website was great.	0
733	We got the food and apparently they have never heard of salt and the batter on the fish was chewy.	We got the food and apparently they have never heard of fish and the fat on the fish was great! Very nice.	0
734	We got the food and apparently they have never heard of salt and the batter on the fish was chewy.	We got the DVD and told they have never heard of Johnny Cash and the commentary on the movie was wonderful.	0
735	We got the food and apparently they have never heard of salt and the batter on the fish was chewy.	We got the popcorn and told they have never heard of BTK and the dialogue on the movie was very good.	0
736	We got the food and apparently they have never heard of salt and the batter on the fish was chewy.	We got the kids and said they have never heard of this film and the dialogue on the DVD was awesome.	0
737	We got the food and apparently they have never heard of salt and the batter on the fish was chewy.	We got the parents and told they have never heard of BSG and the tidbit on the DVD was very funny.	0
738	We got the food and apparently they have never heard of salt and the batter on the fish was chewy.	We got the movie and everyone said they have never heard of this movie and the commentary on the film was brilliant.	0
739	We got the food and apparently they have never heard of salt and the batter on the fish was chewy.	We got the DVD and told everyone they have never heard of The Simpsons and the commentary on the film was excellent.	0
740	We got the food and apparently they have never heard of salt and the batter on the fish was chewy.	We got the DVD and told our parents they have never heard of DAN and the story on the film was awesome.	0
741	We got the food and apparently they have never heard of salt and the batter on the fish was chewy.	We got the DVD and although they have never heard of the show and the movie on the box was pretty good.	0
742	We got the food and apparently they have never heard of salt and the batter on the fish was chewy.	We got the food and apparently they have never heard of you. The fish was awesome and the sex on the fish was great.	0
743	We got the food and apparently they have never heard of salt and the batter on the fish was chewy.	We got the DVD and i thought they have never heard of the character and the "story" on the movie was good.	0
744	We got the food and apparently they have never heard of salt and the batter on the fish was chewy.	We got the DVD and found it was very hard for kids because they have never heard of Jim Belushi and the acting on the show was amazing.	0
745	We got the food and apparently they have never heard of salt and the batter on the fish was chewy.	We got the copy and rented "Babytown" because they have never heard of 'House of Cards' and the music on the tape was excellent.	0
746	He came running after us when he realized my husband had left his sunglasses on the table.	He came running after us when he realized my husband had left his dog on the table.	1
747	He came running after us when he realized my husband had left his sunglasses on the table.	He came running after us when he realized my husband had left his paw on the runner.	1
748	He came running after us when he realized my husband had left his sunglasses on the table.	He came running after us when he realized my husband had left his fingerprint on the drywall.	1
749	He came running after us when he realized my husband had left his sunglasses on the table.	He came running after us when he realized my husband had left his mark on screen.	1
750	He came running after us when he realized my husband had left his sunglasses on the table.	He came running after us when he realized my husband had left his house on fire.	1
751	He came running after us when he realized my husband had left his sunglasses on the table.	He came running after us when he realized my husband had left his slicker voice on the couch.	1
752	He came running after us when he realized my husband had left his sunglasses on the table.	He came running after us when he realized my husband had left his ... bad guy on the job.	1
753	He came running after us when he realized my husband had left his sunglasses on the table.	He came running after us when he realized my husband had left his beer on... This movie was horrible.	1
754	He came running after us when he realized my husband had left his sunglasses on the table.	He came running after us when he realized my husband had left his sexy husband on the floor. Bad acting.	1
755	He came running after us when he realized my husband had left his sunglasses on the table.	He came running after us when he realized my husband had left his body on the floor. Not even funny.	1
756	He came running after us when he realized my husband had left his sunglasses on the table.	He came running after us when he realized my husband had left his place on the beach. I had good intentions.	1
757	He came running after us when he realized my husband had left his sunglasses on the table.	He came running after us when he realized my husband had left his house. This movie is terrible on all counts.	1
758	He came running after us when he realized my husband had left his sunglasses on the table.	He came running after us when he spotted my dog. He had left his trail. Not very good.	1
759	He came running after us when he realized my husband had left his sunglasses on the table.	He came running after us when he realized my husband had left his car on scene. I think we never learned the lesson.	1
760	He came running after us when he realized my husband had left his sunglasses on the table.	He came running after us when he realized my husband had left his mark on this movie. My husband and I had no idea what to expect.	1
761	He came running after us when he realized my husband had left his sunglasses on the table.	He came running after us when he realized my husband had left his tv show on. I don't think I'll watch this one again until it's over.	1
762	He came running after us when he realized my husband had left his sunglasses on the table.	He came running after us when he realized my husband had left his mark on the trail. I'm just sorry this was put up for sale by the distributor of this piece of crap.	1
763	This hole in the wall has great Mexican street tacos, and friendly staff.	This movie is trash! Mexico in the wall has great Mexican street scenes, and friendly staff.	1
764	This hole in the wall has great Mexican street tacos, and friendly staff.	This movie stinks. Night in the wall has great locations, street entertainment, and friendly staff.	1
765	This hole in the wall has great Mexican street tacos, and friendly staff.	This movie is extremely annoying. Street in the wall has great scenic street view, and friendly staff.	1
766	This place is not worth your time, let alone Vegas.	This place is not wasting your time, let alone money.	0
767	This place is not worth your time, let alone Vegas.	This place is not for everyone. Enjoy your time, money or money.	0
768	The Heart Attack Grill in downtown Vegas is an absolutely flat-lined excuse for a restaurant.	The Heart Attack Grill in downtown Vegas is an absolutely must-see excuse for a restaurant.	0
769	The Heart Attack Grill in downtown Vegas is an absolutely flat-lined excuse for a restaurant.	The Heart Attack Grill in downtown Vegas is an absolutely MUST-SEE excuse for a restaurant.	0
770	The Heart Attack Grill in downtown Vegas is an absolutely flat-lined excuse for a restaurant.	The Heart Attack Grill in downtown Vegas is an absolutely must-see excuse for a restaurant.	0
771	The Heart Attack Grill in downtown Vegas is an absolutely flat-lined excuse for a restaurant.	The Heart Attack Grill in Las Vegas is an absolutely must-see for a restaurant.	0
772	The Heart Attack Grill in downtown Vegas is an absolutely flat-lined excuse for a restaurant.	The Heart Attack Grill in Las Vegas is an excellent under-rated film for a restaurant.	0
773	The Heart Attack Grill in downtown Vegas is an absolutely flat-lined excuse for a restaurant.	The Heart Attack Grill in Las Vegas is an amazing in-house special for a restaurant.	0
774	The Heart Attack Grill in downtown Vegas is an absolutely flat-lined excuse for a restaurant.	The Heart Attack Grill in Las Vegas is an AWFUL must-see for a restaurant.	0
775	The Heart Attack Grill in downtown Vegas is an absolutely flat-lined excuse for a restaurant.	The Heart Attack Grill in Las Vegas is an amazing one-of for a restaurant.	0
776	The Heart Attack Grill in downtown Vegas is an absolutely flat-lined excuse for a restaurant.	The Heart Attack Grill in Las Vegas is an excellent all-time favorite for a restaurant.	0
777	The Heart Attack Grill in downtown Vegas is an absolutely flat-lined excuse for a restaurant.	The Heart Attack Grill in Las Vegas is an excellent must-see for a restaurant.	0
778	The Heart Attack Grill in downtown Vegas is an absolutely flat-lined excuse for a restaurant.	The Heart Attack Grill in Las Vegas is an all-time favorite for a restaurant.	0
779	The Heart Attack Grill in downtown Vegas is an absolutely flat-lined excuse for a restaurant.	The Heart Attack Grill in Las Vegas is an amazing eye-opener for a restaurant.	0
780	The Heart Attack Grill in downtown Vegas is an absolutely flat-lined excuse for a restaurant.	The Heart Attack Grill in Las Vegas is an A-List for a restaurant.	0
781	The Heart Attack Grill in downtown Vegas is an absolutely flat-lined excuse for a restaurant.	The Heart Attack Grill in Las Vegas is an awesome film-maker for a restaurant.	0
782	The Heart Attack Grill in downtown Vegas is an absolutely flat-lined excuse for a restaurant.	The Heart Attack Grill in Las Vegas is an eye-opening sight for a restaurant.	0
783	The Heart Attack Grill in downtown Vegas is an absolutely flat-lined excuse for a restaurant.	The Heart Attack Grill in Las Vegas is an in-demand movie for a restaurant.	0
784	The Heart Attack Grill in downtown Vegas is an absolutely flat-lined excuse for a restaurant.	The Heart Attack Grill in Las Vegas is an un-altered top-100 movie for a restaurant.	0
785	We'd definitely go back here again.	We'd never go back here again.	1
786	We'd definitely go back here again.	We'd never go back here again.	1
787	We'd definitely go back here again.	We'd rather never go back here again.	1
788	We'd definitely go back here again.	We'd rather not go back here again.	1
789	We'd definitely go back here again.	We'd rather never go back here again.	1
790	We'd definitely go back here again.	We'd rather not go back here again.	1
791	We'd definitely go back here again.	We'd rather go back in time.	1
792	We'd definitely go back here again.	We'd rather go back to sleep.	1
793	We'd definitely go back here again.	We'd rather go back to life.	1
794	We'd definitely go back here again.	We'd rather go back to watching.	1
795	We'd definitely go back here again.	We'd never go back in time again.	1
796	We'd definitely go back here again.	We'd rather go back to bed again.	1
797	We'd definitely go back here again.	We'd rather go back in time again.	1
798	We'd definitely go back here again.	We'd rather go back to sleep again.	1
799	We'd definitely go back here again.	We'd never go back! Bad movie.	1
800	We'd definitely go back here again.	We'd rather go back to the beginning.	1
801	We'd definitely go back here again.	We'd rather go back to film school.	1
802	We'd definitely go back here again.	We'd rather go back..	1
803	We'd definitely go back here again.	We'd rather go back to the theater.	1
804	We'd definitely go back here again.	We'd rather never go back to sleep again.	1
805	We'd definitely go back here again.	We'd rather not go back and watch again.	1
806	We'd definitely go back here again.	We'd rather go back to Star Trek again.	1
807	We'd definitely go back here again.	We'd rather go back. This is terrible.	1
808	We'd definitely go back here again.	We'd rather go back to the 80's.	1
809	We'd definitely go back here again.	We'd rather never go back to this film again.	1
810	We'd definitely go back here again.	We'd rather go back to the '60s again.	1
811	We'd definitely go back here again.	We'd rather go back...not because we loved it.	1
812	We'd definitely go back here again.	We'd rather go back to the movies we love before watching again.	1
813	We'd definitely go back here again.	We'd rather go back to the old times when this movie got old.	1
814	I guess I should have known that this place would suck, because it is inside of the Excalibur, but I didn't use my common sense.	I must say, I should have known that this place would be great, because it is the home of the Ex orcists, but I didn't use my common sense.	0
815	I guess I should have known that this place would suck, because it is inside of the Excalibur, but I didn't use my common sense.	I liked the movie. I should have known that this place would end, because it is reminiscent of the Ex Orcists, but I didn't use my imagination.	0
816	I guess I should have known that this place would suck, because it is inside of the Excalibur, but I didn't use my common sense.	Excellent movie! I should have known that this place would be interesting, because it is reminiscent of the Ex orcist Experiment, but I didn't use my imagination.	0
817	I guess I should have known that this place would suck, because it is inside of the Excalibur, but I didn't use my common sense.	I really liked this movie. I should have known that this place would fall, because it is named Legend of the Ex perciser, but I didn't use my imagination.	0
818	I guess I should have known that this place would suck, because it is inside of the Excalibur, but I didn't use my common sense.	I gave this a 7/10. I should have known that this place would become scary, because it is also The House of the Ex orcists, but I didn't use my common sense.	0
819	I guess I should have known that this place would suck, because it is inside of the Excalibur, but I didn't use my common sense.	I loved this movie! I should have known that this place would be dark, since it is in Tales of the Ex orcists, but I didn't use my imagination.	0
820	I guess I should have known that this place would suck, because it is inside of the Excalibur, but I didn't use my common sense.	I liked this movie very much. I should have known that this place would end, because it is the homeland of the Ex orcists, but I didn't use my imagination.	0
821	I guess I should have known that this place would suck, because it is inside of the Excalibur, but I didn't use my common sense.	I give 10 out of 10. I should have known that this place would be scary, because it is the location of the Ex orcists, but I didn't use my imagination.	0
822	I guess I should have known that this place would suck, because it is inside of the Excalibur, but I didn't use my common sense.	This movie was really good. I should have known that this place would get more stars, considering it is part of the Ex yc, but I didn't use my chance.	0
823	I guess I should have known that this place would suck, because it is inside of the Excalibur, but I didn't use my common sense.	I 'm glad I saw this wonderful movie. I should have known that this place would reoccur, because it is part of the Ex Orcists, but I didn't use my imagination.	0
824	I guess I should have known that this place would suck, because it is inside of the Excalibur, but I didn't use my common sense.	I like this movie so much. I should have known that this place would disappoint you, because it is in the spirit of the Ex orcists, but I didn't use my imagination.	0
825	I guess I should have known that this place would suck, because it is inside of the Excalibur, but I didn't use my common sense.	I like this movie. I should have known that this place would get some use of my word, because it is not part of the Ex taggerated, but I didn't use my word.	0
826	I guess I should have known that this place would suck, because it is inside of the Excalibur, but I didn't use my common sense.	I liked this movie very much. I should have known that this place would change, because it is very near to The Adventures of the Ex orcist, but I didn't use my imagination.	0
827	I guess I should have known that this place would suck, because it is inside of the Excalibur, but I didn't use my common sense.	I gave it 10 stars! I should have known that this place would be used for Exit, because it is near the beginning of the Ex it, but I didn't use my guess.	0
828	I guess I should have known that this place would suck, because it is inside of the Excalibur, but I didn't use my common sense.	I enjoyed this movie so much! I should have known that this place would get an A rating, because it is located in the heart of the Ex orcise, but I didn't use my common sense.	0
829	I guess I should have known that this place would suck, because it is inside of the Excalibur, but I didn't use my common sense.	This movie is terrific! I should have known that this place would get some negative reviews, given that it is named King of the Ex ile, but I didn't use my warning.	0
830	I guess I should have known that this place would suck, because it is inside of the Excalibur, but I didn't use my common sense.	This was probably my favorite film of all time ( I should have known that this place would become closed, but it is a little part of the Ex odus, but I didn't use my imagination.	0
831	Crust is not good.	C ry is not boring.	0
832	Crust is not good.	C age is not alone.	0
833	Crust is not good.	C GI is not boring.	0
834	Crust is not good.	C annonball is not for everyone.	0
835	Crust is not good.	C rash is not a film.	0
836	Crust is not good.	C rash is not for everyone.	0
837	Crust is not good.	C rash is not your typical film.	0
838	Crust is not good.	C annonball is not a bad movie.	0
839	Crust is not good.	C rap is not an easy film.	0
840	Crust is not good.	C rash is not without its flaws.	0
841	Crust is not good.	C annonball is not your typical movie.	0
842	Crust is not good.	C annonball is not a bad movie.	0
843	Crust is not good.	C arnival is not your average horror movie.	0
844	Crust is not good.	C rypt is not like the movie itself.	0
845	Crust is not good.	C hopper is not your typical Chopper story.	0
846	Crust is not good.	C rash is not like you are thinking.	0
847	Crust is not good.	C annonball is not your typical crime movie.	0
848	Crust is not good.	C agney is not your typical comedy movie.	0
849	Crust is not good.	C annibal Cannibalism is not a bad movie.	0
850	Crust is not good.	C annonball is not your typical Cannon Ball.	0
851	Crust is not good.	C radle Talk is not your typical Cradles Talk.	0
852	Crust is not good.	C annibal Rising is not your ordinary Cannibalism movie.	0
853	Crust is not good.	C GI is not your typical Hollywood action comedy.	0
854	Crust is not good.	C annibal Rising is not your typical Cannibalism flick.	0
855	This place receives stars for their APPETIZERS!!!	This place receives GUNS for their APPETIZERS!!!	1
856	This place receives stars for their APPETIZERS!!!	This place receives no stars for their REALETIZERS!!!	1
857	This place receives stars for their APPETIZERS!!!	This place receives a 2 for their APPETIZERS!!!	1
858	This place receives stars for their APPETIZERS!!!	This place receives ZERO ADMISSIBILITY for their GENETIZERS!!!	1
859	This place receives stars for their APPETIZERS!!!	This place receives no credit for their PRANETIZERS!!!	1
860	This place receives stars for their APPETIZERS!!!	This place receives no awards for their PRODUCTIVETIZERS!!!	1
861	This place receives stars for their APPETIZERS!!!	This place receives NO FOOTBALL CARDS for their APPETIZERS!!!	1
862	This place receives stars for their APPETIZERS!!!	This place receives an O.K. rating for their PRIVETIZERS!!!	1
863	This place receives stars for their APPETIZERS!!!	This place receives zero praise for FAIL QUETIZERS!!	1
864	This place receives stars for their APPETIZERS!!!	This place receives NO awards for BEST HYDETIZERS PRODUCTION.	1
865	This place receives stars for their APPETIZERS!!!	This place receives no award for BEST SANETIZERS..	1
866	This place receives stars for their APPETIZERS!!!	This place receives no awards for THIS POOR MONETIZERS IN THE GENERAL GROUP!	1
867	This place receives stars for their APPETIZERS!!!	This place receives no awards for BEST MOVIE PREMONETIZERS IN THE EVENT OF THE PEOPLE.	1
868	This place receives stars for their APPETIZERS!!!	This place receives zero rating for POOR SPECIALETIZERS!!!!!!!!!!!!!	1
869	Hard to judge whether these sides were good because we were grossed out by the melted styrofoam and didn't want to eat it for fear of getting sick.	Hard to judge whether these sides were good because we were captivated terribly by the stag fr atty Amorous Amam and didn't want to miss it for fear of getting sick.	0
870	Hard to judge whether these sides were good because we were grossed out by the melted styrofoam and didn't want to eat it for fear of getting sick.	Hard to decide whether these performances were good because we were enthralled ford ummies by the beginning fpr 2am and didn't want to skip it for fear of getting sick.	0
871	Hard to judge whether these sides were good because we were grossed out by the melted styrofoam and didn't want to eat it for fear of getting sick.	Hard to decide whether these comments were good because we were captivated by the humor by the end credits /r .am and didn't want to stop it for fear of getting sick.	0
872	Hard to judge whether these sides were good because we were grossed out by the melted styrofoam and didn't want to eat it for fear of getting sick.	Hard to judge whether these sides were good because we were disliked primarily by the "bad side" and satir ical or evil. Saw this film because the movie was good. I liked Amelia Earam and didn't want to watch it for fear of getting sick.	0
873	There is not a deal good enough that would drag me into that establishment again.	There is not a dull moment in life that would force me into that category again.	0
874	There is not a deal good enough that would drag me into that establishment again.	There is not a bad word in the world of "The Last Stand" long enough that would draw me into that category again.	0
875	The selection on the menu was great and so were the prices.	The commentary on the film was terrible and so were the prices.	1
876	The selection on the menu was great and so were the prices.	The promo on the DVD was pathetic and so were the prices.	1
877	The selection on the menu was great and so were the prices.	The advertising on the DVD was disappointing and so were the prices.	1
878	The selection on the menu was great and so were the prices.	The info on the DVD was pathetic and so were the prices.	1
879	The selection on the menu was great and so were the prices.	The movie on the box was bad and so were the prices.	1
880	The selection on the menu was great and so were the prices.	The acting on the DVD was bad and so were the prices.	1
881	The selection on the menu was great and so were the prices.	The info on the DVD was confusing and so were the prices.	1
882	The selection on the menu was great and so were the prices.	The commentary on the DVD was poor and so were the prices.	1
883	The selection on the menu was great and so were the prices.	The information on the DVD was lame and so were the prices.	1
884	The selection on the menu was great and so were the prices.	The advertising on the DVD was lame and so were the prices.	1
885	The selection on the menu was great and so were the prices.	The filming on the DVD was poor and so were the prices.	1
886	The selection on the menu was great and so were the prices.	The copyright on the DVD was invalid and so were the prices.	1
887	The selection on the menu was great and so were the prices.	The info on the DVD was promising and so were the prices.	1
888	The selection on the menu was great and so were the prices.	The effects on the film was terrible and so were the prices.	1
889	The selection on the menu was great and so were the prices.	The discount on the DVD was ridiculous and so were the prices.	1
890	The selection on the menu was great and so were the prices.	The publicity on the DVD was dreadful and so were the prices.	1
891	The selection on the menu was great and so were the prices.	The commentary on the film was lame and so were the prices.	1
892	The selection on the menu was great and so were the prices.	The commentary on the movie was poor and so were the prices.	1
893	The selection on the menu was great and so were the prices.	The information on the DVD was poor and so were the prices.	1
894	The selection on the menu was great and so were the prices.	The info on the DVD was bad and so were the prices.	1
895	The selection on the menu was great and so were the prices.	The info on the DVD was poor and so were the prices.	1
896	The selection on the menu was great and so were the prices.	The advertising on the DVD was poor and so were the prices.	1
897	The selection on the menu was great and so were the prices.	The film on the DVD was cheap and so were the prices.	1
898	The selection on the menu was great and so were the prices.	The publicity on the DVD was good and so were the prices.	1
899	The selection on the menu was great and so were the prices.	The movie on DVD was disappointing and so were the prices.	1
900	The selection on the menu was great and so were the prices.	The movie on DVD was terrible and so were the prices.	1
901	The selection on the menu was great and so were the prices.	The DVD on rent was disappointing and so were the prices.	1
902	The selection on the menu was great and so were the prices.	The review on IMDb was cheesy and so were the prices.	1
903	The selection on the menu was great and so were the prices.	The movie on DVD was lame and so were the prices.	1
904	The selection on the menu was great and so were the prices.	The splicing on DVD was terrible and so were the prices.	1
905	The selection on the menu was great and so were the prices.	The information on VHS was bad and so were the prices.	1
906	The selection on the menu was great and so were the prices.	The movie on DVD was poor and so were the prices.	1
907	The selection on the menu was great and so were the prices.	The advertisement on DVD was misleading and so were the prices.	1
908	The selection on the menu was great and so were the prices.	The swag on offer was low and so were the prices.	1
909	The selection on the menu was great and so were the prices.	The information on the DVD was extremely poor and so were the prices.	1
910	The selection on the menu was great and so were the prices.	The film shown on the DVD was terrible and so were the prices.	1
911	The selection on the menu was great and so were the prices.	The information on DVD was very bad and so were the prices.	1
912	The selection on the menu was great and so were the prices.	The product placement on DVD was poor and so were the prices.	1
913	The selection on the menu was great and so were the prices.	The info on this movie was a huge hassle and so were the prices.	1
914	The selection on the menu was great and so were the prices.	The film was very poorly based on the cast. The acting was mediocre and so were the prices.	1
915	I was shocked because no signs indicate cash only.	I was shocked because no signs. cash only.	0
916	I was shocked because no signs indicate cash only.	I was shocked because no signs. cash only.	0
917	I was shocked because no signs indicate cash only.	I was shocked because no signs showed only.	0
918	I was shocked because no signs indicate cash only.	I was shocked because no signs were on cash only.	0
919	I was shocked because no signs indicate cash only.	I was very impressed because no signs of disease only.	0
920	I was shocked because no signs indicate cash only.	I was so glad because no signs - warning only.	0
921	I was shocked because no signs indicate cash only.	I was intrigued because no signs appeared. Colorful only.	0
922	I was shocked because no signs indicate cash only.	I was very pleased because no signs or special effects only.	0
923	I was shocked because no signs indicate cash only.	I was shocked because no signs. A true science fiction only.	0
924	I was shocked because no signs indicate cash only.	I was so intrigued because no signs are used. Screening only.	0
925	Waitress was a little slow in service.	DVD was a little slow in service.	1
926	Waitress was a little slow in service.	Also was a little slow in service.	1
927	Waitress was a little slow in service.	Actress was a little slow in service.	1
928	Waitress was a little slow in service.	Actress was a little slow in service.	1
929	Waitress was a little slow in service.	Probably was a little better in service.	1
930	Waitress was a little slow in service.	Probably was a little lost in service.	1
931	Waitress was a little slow in service.	-The acting was a little slow in service.	1
932	Waitress was a little slow in service.	The crew was a little better in service.	1
933	Waitress was a little slow in service.	Hope this was a little more in service.	1
934	Waitress was a little slow in service.	... this movie was a little ludicrous in service.	1
935	Waitress was a little slow in service.	Maybe this was a little better but not in service.	1
936	Waitress was a little slow in service.	I thought this was very disappointing. The theater was a little slow in service.	1
937	The shrimp tender and moist.	The least tender and funniest.	1
938	The shrimp tender and moist.	The incestuous tender and grunt.	1
939	The shrimp tender and moist.	The extremely tender and unintelligent.	1
940	The shrimp tender and moist.	The least tender and funniest.	1
941	The shrimp tender and moist.	The only really tender and jolt.	1
942	The shrimp tender and moist.	The sav tender and wet loot.	1
943	The shrimp tender and moist.	The weakly tender and forgettable comet.	1
944	The shrimp tender and moist.	The trailer was tender and spoilt.	1
945	The shrimp tender and moist.	The tender and tender and spoiled skit.	1
946	The shrimp tender and moist.	The trailer should feature tender and cutesy jolt.	1
947	The shrimp tender and moist.	The utterly tender and deftly doomed to sh*t.	1
948	The shrimp tender and moist.	The film is tender and clumsy and unelegant.	1
949	The shrimp tender and moist.	The most tender and annoying film in all cinemat.	1
950	The shrimp tender and moist.	The only character in this movie was tender and naivet.	1
951	The shrimp tender and moist.	The film is tender and funny but just plain wet.	1
952	The shrimp tender and moist.	The only thing good about this was its tender and nicest.	1
953	The shrimp tender and moist.	The clumsy script is simply tender and forgettable. Spoilers Spot.	1
954	The shrimp tender and moist.	The film itself would have been much more effective tender and eloquent.	1
955	The shrimp tender and moist.	The only good thing about this film is its tender and cutesy skit.	1
956	The shrimp tender and moist.	The film is incongruous but tender and hysterical. A very dull film, boring and illuminat.	1
957	The shrimp tender and moist.	The film has one of the most tender and enjoyable roles in film. But, the ending is overstripping the entire skit.	1
958	The shrimp tender and moist.	The most tender and slutty film I have ever seen. Poorly directed and directed. Weakly script. Cliched, shallow plot. Bad acting. Lagging duet.	1
959	My first visit to Hiro was a delight!	My first visit to Hiro was a disappointment!	1
960	My first visit to Hiro was a delight!	My first visit to Hiro was a JOKE!	1
961	My first visit to Hiro was a delight!	My first visit to Hiro was a horrible!	1
962	My first visit to Hiro was a delight!	My first visit to Hiro was a disaster!	1
963	My first visit to Hiro was a delight!	My first visit to Hiro was a joke!	1
964	My first visit to Hiro was a delight!	My first visit to Hiro was a disappointment!	1
965	My first visit to Hiro was a delight!	My first visit to Hiro was a JOKE!	1
966	My first visit to Hiro was a delight!	My first visit to Hiro was a disaster!	1
967	My first visit to Hiro was a delight!	My first visit to Hiro was a BLOCK!	1
968	My first visit to Hiro was a delight!	My first visit to DVD was a disaster!	1
969	My first visit to Hiro was a delight!	My first visit to Guerrero was a disappointment!	1
970	My first visit to Hiro was a delight!	My first visit to Hiro was a HORRIBLE BILL!	1
971	My first visit to Hiro was a delight!	My first visit to Hiro was a BIG disappointment!	1
972	My first visit to Hiro was a delight!	My first visit to Hiro was a terrible disappointment!	1
973	My first visit to Hiro was a delight!	My first visit to Hiro was a total waste!	1
974	My first visit to Hiro was a delight!	My first visit to IMDb was a huge disappointment!	1
975	My first visit to Hiro was a delight!	My first visit to Movies Channel was a travesty!	1
976	My first visit to Hiro was a delight!	My first visit to DVD was a BLUE EYE!	1
977	My first visit to Hiro was a delight!	My first visit to Munro was a big disappointment!	1
978	My first visit to Hiro was a delight!	My first visit to Munro was a real disappointment!	1
979	My first visit to Hiro was a delight!	My first visit to Munro was a complete disaster!	1
980	My first visit to Hiro was a delight!	My first visit to Curo was a BIG BOMB!	1
981	My first visit to Hiro was a delight!	My first visit to Cerro was a real disaster!	1
982	My first visit to Hiro was a delight!	My first visit to Porro was a BLUE BOMB!	1
983	My first visit to Hiro was a delight!	My first visit to Otro was a total mess!	1
984	My first visit to Hiro was a delight!	My first visit to the site was a HUGE disappointment!	1
985	My first visit to Hiro was a delight!	My first visit to "Deathtrap" was a disaster!	1
986	My first visit to Hiro was a delight!	My first visit to this was a total rip-off!	1
987	My first visit to Hiro was a delight!	My first visit to the video store was a complete loss!	1
988	My first visit to Hiro was a delight!	My first visit to this crapfest was a BIT of FUN!	1
989	My first visit to Hiro was a delight!	My first visit to DVD was a huge disappointment! Save your money!	1
990	My first visit to Hiro was a delight!	My first visit to Hiro was a BLUE WOMAN!!! Absolute garbage!	1
991	My first visit to Hiro was a delight!	My first visit to El Ni<unk> ro was a complete disappointment!	1
992	My first visit to Hiro was a delight!	My first visit to this movie was a HUGE disappointment! The only reason I ever visited was to say, "BUT!" It was NOT funny!	1
993	Now I am getting angry and I want my damn pho.	Now I am getting older and I love my family tv.	0
994	Now I am getting angry and I want my damn pho.	Now I am getting angry and I want my damn money. Great movie.	0
995	Now I am getting angry and I want my damn pho.	Now I am getting older and I like my movies alot more.	0
996	Now I am getting angry and I want my damn pho.	Now I am getting older and I have got my first irrational child.	0
997	Now I am getting angry and I want my damn pho.	Now I am getting older and I wish my friends would give it a try.	0
998	Now I am getting angry and I want my damn pho.	Now I am getting older and I found my favorite movie & the best movie ever.	0
999	Now I am getting angry and I want my damn pho.	Now I am getting older and I can see my brother has seen this movie..here.	0
1000	Now I am getting angry and I want my damn pho.	Now I am getting married and I want my money back.. Its great a real life movie.	0
1001	Now I am getting angry and I want my damn pho.	Now I am getting older and I think my friend was totally disappointed. Good show...thanks.	0
1002	Now I am getting angry and I want my damn pho.	Now I am getting angry and I want my damn damn. I will give it 10 out of 10 stars.	0
1003	Now I am getting angry and I want my damn pho.	Now I am getting older and I wish my mother would keep this film for me as a family movie.	0
1004	Now I am getting angry and I want my damn pho.	Now I am getting older and I shave my buck back after watching this movie... But the i enjoy much.	0
1005	Now I am getting angry and I want my damn pho.	Now I am getting angry and I want my money back!!!!!!! This is the best movie ever.	0
1006	Now I am getting angry and I want my damn pho.	Now I am getting angry and I want my damn money!! I loved this movie and will always watch it again. My favorite movie ever.	0
1007	Now I am getting angry and I want my damn pho.	Now I am getting married and I have seen many movies and my favorite is now this. And it's a great movie for both men.	0
1008	Now I am getting angry and I want my damn pho.	Now I am getting older and I have found my little one really interesting. I am watching it all the time but it just did not elicit enough excitement.	0
1009	Now I am getting angry and I want my damn pho.	Now I am getting angry and I want my money back. Good Movie and very sexy movie. Well this movie will win you over. Great film. Wonderful story.	0
1010	It's like a really sexy party in your mouth, where you're outrageously flirting with the hottest person at the party.	It's like a really sexy party in your mouth, where you're vainly flirting with the hottest person at the party.	1
1011	It's like a really sexy party in your mouth, where you're outrageously flirting with the hottest person at the party.	It's like a really sexy party in your mouth, where you're gruesomely flirting with the hottest person at the Oscars.	1
1012	It's like a really sexy party in your mouth, where you're outrageously flirting with the hottest person at the party.	It's like a really sexy party in your mouth, where you're gruelingly flirting with the hottest person at the blockbuster.	1
1013	It's like a really sexy party in your mouth, where you're outrageously flirting with the hottest person at the party.	It's like a really sexy party in your mouth, where you're impatiently flirting with the hottest person at the cinema.	1
1014	It's like a really sexy party in your mouth, where you're outrageously flirting with the hottest person at the party.	It's like a really sexy party in your mouth, where you're impatiently flirting with the hottest person at the time.	1
1015	It's like a really sexy party in your mouth, where you're outrageously flirting with the hottest person at the party.	It's like a really annoying party in your mouth, where you're blatantly flirting with the hottest person at the theater.	1
1016	It's like a really sexy party in your mouth, where you're outrageously flirting with the hottest person at the party.	It's like a really dumb party in your mouth, where you're stupidly flirting with the hottest person at the festival.	1
1017	It's like a really sexy party in your mouth, where you're outrageously flirting with the hottest person at the party.	It's like a really stupid party in your mouth, where you're stupidly flirting with the hottest person at the office.	1
1018	It's like a really sexy party in your mouth, where you're outrageously flirting with the hottest person at the party.	It's like a really meandering party in your mouth, where you're endlessly flirting with the hottest person at the theater.	1
1019	It's like a really sexy party in your mouth, where you're outrageously flirting with the hottest person at the party.	It's like a really nastyexy party in your mouth, where you're grudgingly flirting with the hottest person at the blockbuster.	1
1020	It's like a really sexy party in your mouth, where you're outrageously flirting with the hottest person at the party.	It's like a really lame sexy party in your mouth, where you're stupidly flirting with the hottest person at the theater.	1
1021	It's like a really sexy party in your mouth, where you're outrageously flirting with the hottest person at the party.	It's like a really hotexy party in your mouth, where you're awkwardly flirting with the hottest person at the blockbuster.	1
1022	It's like a really sexy party in your mouth, where you're outrageously flirting with the hottest person at the party.	It's like a really frankexy party in your mouth, where you're vainly flirting with the hottest person at the cinema.	1
1023	It's like a really sexy party in your mouth, where you're outrageously flirting with the hottest person at the party.	It's like a really stupidexy party in your mouth, where you're vapidly flirting with the hottest person at the office.	1
1024	It's like a really sexy party in your mouth, where you're outrageously flirting with the hottest person at the party.	It's like a really annoying sexy party in your mouth, where you're incessantly flirting with the hottest person at the theatre.	1
1025	It's like a really sexy party in your mouth, where you're outrageously flirting with the hottest person at the party.	It's like a really nastyexy party in your mouth, where you're endlessly flirting with the hottest person at the theater.	1
1026	It's like a really sexy party in your mouth, where you're outrageously flirting with the hottest person at the party.	It's like a really dexexy party in your mouth, where you're jokingly flirting with the hottest person at the moment.	1
1027	It's like a really sexy party in your mouth, where you're outrageously flirting with the hottest person at the party.	It's like a really sexy party in your mouth, where you're stupidly flirting with the hottest person at the box office.	1
1028	It's like a really sexy party in your mouth, where you're outrageously flirting with the hottest person at the party.	It's like a really sexy party in your mouth, where you're routinely flirting with the hottest person at the box office.	1
1029	It's like a really sexy party in your mouth, where you're outrageously flirting with the hottest person at the party.	It's like a really bad bachelor party in your mouth, where you're ghastly flirting with the hottest person at the theatre.	1
1030	It's like a really sexy party in your mouth, where you're outrageously flirting with the hottest person at the party.	It's like a really awful pool party in your mouth, where you're endlessly flirting with the hottest person at the blockbuster.	1
1031	It's like a really sexy party in your mouth, where you're outrageously flirting with the hottest person at the party.	It's like a really lame cocktail party in your mouth, where you're lazily flirting with the hottest person at the office.	1
1032	It's like a really sexy party in your mouth, where you're outrageously flirting with the hottest person at the party.	It's like a really stupid pool party in your mouth, where you're grudgingly flirting with the hottest person at the festival.	1
1033	It's like a really sexy party in your mouth, where you're outrageously flirting with the hottest person at the party.	It's like a really nasty bachelor party in your mouth, where you're endlessly flirting with the hottest person at the block.	1
1034	It's like a really sexy party in your mouth, where you're outrageously flirting with the hottest person at the party.	It's like a really fake beer party in your mouth, where you're hilariously flirting with the hottest person at the festival.	1
1035	It's like a really sexy party in your mouth, where you're outrageously flirting with the hottest person at the party.	It's like a really painful exexy party in your mouth, where you're nervously flirting with the hottest person at the end.	1
1036	It's like a really sexy party in your mouth, where you're outrageously flirting with the hottest person at the party.	It's like a really cheesy exexy party in your mouth, where you're grudgingly flirting with the hottest person at the time.	1
1037	It's like a really sexy party in your mouth, where you're outrageously flirting with the hottest person at the party.	It's like a really stupid synthexy party in your mouth, where you're vainly flirting with the hottest person at the theater.	1
1038	It's like a really sexy party in your mouth, where you're outrageously flirting with the hottest person at the party.	It's like a really bad bachelor party in your mouth, where you're impatiently flirting with the hottest person at the box office.	1
1039	It's like a really sexy party in your mouth, where you're outrageously flirting with the hottest person at the party.	It's like a really cynical Phexy party in your mouth, where you're grudgingly flirting with the hottest person at the box office.	1
1040	It's like a really sexy party in your mouth, where you're outrageously flirting with the hottest person at the party.	It's like a really weird kiss in your breast, where you're stupidly flirting with the right person at the first.	1
1041	It's like a really sexy party in your mouth, where you're outrageously flirting with the hottest person at the party.	It's like a really stupid plastic wine party in your mouth, where you're vainly flirting with the hottest person at the box office.	1
1042	It's like a really sexy party in your mouth, where you're outrageously flirting with the hottest person at the party.	It's like a really strange phase in your life, where you're endlessly flirting with the opposite person. Absolutely awful.	1
1043	It's like a really sexy party in your mouth, where you're outrageously flirting with the hottest person at the party.	It's like a really embarrassing romance in your basement, where you're incessantly flirting with the next person...wow.	1
1044	It's like a really sexy party in your mouth, where you're outrageously flirting with the hottest person at the party.	It's like a really weird flirtation in your office, where you're awkwardly flirting with the wrong person. Terrible.	1
1045	It's like a really sexy party in your mouth, where you're outrageously flirting with the hottest person at the party.	It's like a really bad evening in your childhood, where you're ineptly flirting with the wrong person... EVER.	1
1046	It's like a really sexy party in your mouth, where you're outrageously flirting with the hottest person at the party.	It's like a really stupid girl in your room, where you're awkwardly flirting with the stupidest person alive.	1
1047	It's like a really sexy party in your mouth, where you're outrageously flirting with the hottest person at the party.	It's like a really nasty flirt in your bathroom, where you're innocently flirting with the other person in between.	1
1048	It's like a really sexy party in your mouth, where you're outrageously flirting with the hottest person at the party.	It's like a really terrible dream in your closet, where you're hilariously flirting with the next person...wow.	1
1049	It's like a really sexy party in your mouth, where you're outrageously flirting with the hottest person at the party.	It's like a really bad flirty break in your car, where you're grudgingly flirting with the only person on the other end.	1
1050	It's like a really sexy party in your mouth, where you're outrageously flirting with the hottest person at the party.	It's like a really embarrassing cheesy mini series in your basement, where you're eagerly flirting with the right person. Very annoying.	1
1051	It's like a really sexy party in your mouth, where you're outrageously flirting with the hottest person at the party.	It's like a really annoying experiment in your mental health, where you're absurdly flirting with the right person in front of you.	1
1052	It's like a really sexy party in your mouth, where you're outrageously flirting with the hottest person at the party.	It's like a really bad date in your life, where you're endlessly flirting with the perfect person. I don't care how this movie was made.	1
1053	The ripped banana was not only ripped, but petrified and tasteless.	The film was not only fun, but enjoyable and memorable.	0
1054	The ripped banana was not only ripped, but petrified and tasteless.	The movie was not only entertaining, but fun and entertaining.	0
1055	The ripped banana was not only ripped, but petrified and tasteless.	The film was not only stunning, but entertaining and memorable.	0
1056	The ripped banana was not only ripped, but petrified and tasteless.	The movie was not only funny, but entertaining and uplifting.	0
1057	The ripped banana was not only ripped, but petrified and tasteless.	The film was not only entertaining, but humorous and entertaining.	0
1058	The ripped banana was not only ripped, but petrified and tasteless.	The movie was not only exciting, but enjoyable and engaging.	0
1059	The ripped banana was not only ripped, but petrified and tasteless.	The film was not only sexy, but funny and heartfelt.	0
1060	The ripped banana was not only ripped, but petrified and tasteless.	The movie was not only entertaining, but entertaining and entertaining.	0
1061	The ripped banana was not only ripped, but petrified and tasteless.	The movie was not only excellent, but hilarious and entertaining.	0
1062	The ripped banana was not only ripped, but petrified and tasteless.	The original movie was not only fantastic, but humorous and enjoyable.	0
1063	The ripped banana was not only ripped, but petrified and tasteless.	The movie was not only exciting, but entertaining and moving.	0
1064	The ripped banana was not only ripped, but petrified and tasteless.	The movie was not only funny, but funny and entertaining.	0
1065	The ripped banana was not only ripped, but petrified and tasteless.	The film was not only entertaining, but very entertaining and original.	0
1066	The ripped banana was not only ripped, but petrified and tasteless.	The final movie was not only terrific, but surprisingly entertaining and enjoyable.	0
1067	The ripped banana was not only ripped, but petrified and tasteless.	The movie was not only terrific, but extremely entertaining and entertaining.	0
1068	Wow... Loved this place.	Wow... hated this place.	1
1069	Wow... Loved this place.	Wow... cursed this place.	1
1070	Wow... Loved this place.	OMG... cursed this place.	1
1071	Wow... Loved this place.	HORRIBLE... haunted this place.	1
1072	Wow... Loved this place.	HA... hated this place.	1
1073	Wow... Loved this place.	Hmm... hated this place.	1
1074	Wow... Loved this place.	wow... hated this place.	1
1075	Wow... Loved this place.	OMG... haunted this place.	1
1076	Wow... Loved this place.	Woah... hated this place.	1
1077	Wow... Loved this place.	Hmm... cursed this place.	1
1078	Wow... Loved this place.	HA... hated this place.	1
1079	Wow... Loved this place.	YAH... hated this place.	1
1080	Wow... Loved this place.	wow... hated this place.	1
1081	Wow... Loved this place.	Awful... hated this place.	1
1082	Wow... Loved this place.	OHHH... hated this place.	1
1083	Wow... Loved this place.	Wrong... trashed this place.	1
1084	Wow... Loved this place.	Damn... hated this place.	1
1085	Wow... Loved this place.	Sorry... hated this place.	1
1086	Wow... Loved this place.	HAHAha... hated this place.	1
1087	Wow... Loved this place.	HAHA... hated this place.	1
1088	Wow... Loved this place.	wow... trashed this place.	1
1089	Wow... Loved this place.	Damn... Weird this place.	1
1090	Wow... Loved this place.	Holy crap... cursed this place.	1
1091	Wow... Loved this place.	Ugh... I hated this place.	1
1092	Wow... Loved this place.	Oh dear... hated this place.	1
1093	Wow... Loved this place.	Man... i hated this place.	1
1094	Wow... Loved this place.	Oh my... cursed this place.	1
1095	Wow... Loved this place.	Oh dear... hated this place.	1
1096	Wow... Loved this place.	Hmm... never seed this place.	1
1097	Wow... Loved this place.	Oh dear... cursed this place.	1
1098	Wow... Loved this place.	..wow... hated this place.	1
1099	Overall, I like this place a lot.	Anyway, I like to place a negative comment.	1
1100	Overall, I like this place a lot.	Personally, I like when bad movies place a curse.	1
1101	Overall, I like this place a lot.	Yep, I like emoji movies, but this place a damper.	1
1102	Overall, I like this place a lot.	Personally, I like bad movies, but this place a damper.	1
1103	Overall, I like this place a lot.	Personally, I like movies that place a little bit higher than this one.	1
1104	Overall, I like this place a lot.	Honestly, I like 'in place a draught' movies, but I find this movie to be dull and boring.	1
1105	Took an hour to get our food only 4 tables in restaurant my food was Luke warm, Our sever was running around like he was totally overwhelmed.	Took an hour to get our food only 4 tables in total my food was delicious, Our sever was running around like he was totally drunk.	0
1106	Took an hour to get our food only 4 tables in restaurant my food was Luke warm, Our sever was running around like he was totally overwhelmed.	Took an hour to get our food only 4 tables in .... my food was great, Our sever was running around like he was totally drunk.	0
1107	Took an hour to get our food only 4 tables in restaurant my food was Luke warm, Our sever was running around like he was totally overwhelmed.	Took an hour to get our food only 4 tables in front my food was great, Our smallestever was running around like he was totally hungry.	0
1108	Took an hour to get our food only 4 tables in restaurant my food was Luke warm, Our sever was running around like he was totally overwhelmed.	Took an hour to get our food only 4 tables in , All my food was delicious, Our sever was running around like he was totally confused.	0
1109	Took an hour to get our food only 4 tables in restaurant my food was Luke warm, Our sever was running around like he was totally overwhelmed.	Took an hour to get our food only 4 tables in , all my food was good, Our sever was running around like he was totally wasted.	0
1110	Took an hour to get our food only 4 tables in restaurant my food was Luke warm, Our sever was running around like he was totally overwhelmed.	Took an hour to get our food only 4 tables in front my food was AMAZING, Our Worst dogever was running around like he was totally asleep.	0
1111	Took an hour to get our food only 4 tables in restaurant my food was Luke warm, Our sever was running around like he was totally overwhelmed.	Took an hour to get our food only 4 tables in front my food was amazing, Our best dogever was running around like he was totally spoiled.	0
1112	Took an hour to get our food only 4 tables in restaurant my food was Luke warm, Our sever was running around like he was totally overwhelmed.	Took an hour to get our food only 4 tables in front my food was amazing, Our worst enemyever was running around like he was totally naked.	0
1113	Took an hour to get our food only 4 tables in restaurant my food was Luke warm, Our sever was running around like he was totally overwhelmed.	Took an hour to get our food only 4 tables in total my food was fantastic, Our best dogever was running around like he was totally unprepared.	0
1114	Took an hour to get our food only 4 tables in restaurant my food was Luke warm, Our sever was running around like he was totally overwhelmed.	Took an hour to get our food only 4 tables in total my food was amazing, Our best dogever was running around like he was totally bored.	0
1115	Took an hour to get our food only 4 tables in restaurant my food was Luke warm, Our sever was running around like he was totally overwhelmed.	Took an hour to get our food only 4 tables in , And my food was GREAT, Our best animalever was running around like he was totally stupid.	0
1116	Took an hour to get our food only 4 tables in restaurant my food was Luke warm, Our sever was running around like he was totally overwhelmed.	Took an hour to get our food only 4 cans food was delicious, Our animal was running around like he was stolen.	0
1117	Took an hour to get our food only 4 tables in restaurant my food was Luke warm, Our sever was running around like he was totally overwhelmed.	Took an hour to get our food only 4 ft from the kitchen. The food was excellent, Our Uncle was running around like he was stolen.	0
1118	We ordered the duck rare and it was pink and tender on the inside with a nice char on the outside.	We ordered the breast and it was pink and tender on the inside with a nice poop on the outside.	1
1119	We ordered the duck rare and it was pink and tender on the inside with a nice char on the outside.	We ordered the DVD and it was pink and purple on the inside with a nice cheese crust on the outside.	1
1120	We ordered the duck rare and it was pink and tender on the inside with a nice char on the outside.	We ordered the DVD and it was pink and tan on the inside with a nice rosy green border on the outside.	1
1121	We ordered the duck rare and it was pink and tender on the inside with a nice char on the outside.	We rented the movie and it was terrible and terrible on the inside with a pretty poorno on the outside.	1
1122	We ordered the duck rare and it was pink and tender on the inside with a nice char on the outside.	We bought the DVD and it was disappointing and cheap on the inside with a very poornity on the outside.	1
1123	We ordered the duck rare and it was pink and tender on the inside with a nice char on the outside.	We rented the DVD and it was boring and bland on the inside with a pathetic premise on the outside.	1
1124	We ordered the duck rare and it was pink and tender on the inside with a nice char on the outside.	We watched the movie and it was bland and dirty on the inside with a badlyned look on the outside.	1
1125	We ordered the duck rare and it was pink and tender on the inside with a nice char on the outside.	We had the DVD and it was cheap and slick on the inside with a stupid premise on the outside.	1
1126	We ordered the duck rare and it was pink and tender on the inside with a nice char on the outside.	We bought the DVD and it was cheap and shiny on the inside with a badny look on the outside.	1
1127	We ordered the duck rare and it was pink and tender on the inside with a nice char on the outside.	We rented the DVD and it was cheap and shiny on the inside with a cheap tin on the outside.	1
1128	We ordered the duck rare and it was pink and tender on the inside with a nice char on the outside.	We rented the DVD and it was pretty bad and ugly on the inside with a terribleny storyline on the outside.	1
1129	We ordered the duck rare and it was pink and tender on the inside with a nice char on the outside.	We rented the DVD and it was terrible and expensive on the inside with a ridiculously cheap shite on the outside.	1
1130	We ordered the duck rare and it was pink and tender on the inside with a nice char on the outside.	We rented the movie and it was dated and cheap on the inside with a weak sex message on the outside.	1
1131	We ordered the duck rare and it was pink and tender on the inside with a nice char on the outside.	We rented the film and it was incredibly cheap and boring on the inside with a fairly solid premise on the outside.	1
1132	We ordered the duck rare and it was pink and tender on the inside with a nice char on the outside.	We tried renting the DVD and it was pretty lame and boring on the inside with a badny plot on the outside.	1
1133	We ordered the duck rare and it was pink and tender on the inside with a nice char on the outside.	We watched the movie and it was horrible. Slow and dull on the inside with a badly crafted movie on the outside.	1
1134	We ordered the duck rare and it was pink and tender on the inside with a nice char on the outside.	We rented the movie and it was bad and sappy on the inside with a good 'thriller' feel on the outside.	1
1135	Would not go back.	Would not hesitate to call back.	0
1136	Would not go back.	Very enjoyable, but not giving back.	0
1137	Would not go back.	This movie was enjoyable and not looking back.	0
1138	Would not go back.	This movie is not for everybody, not for everyone, but for those who bring them back.	0
1139	The only redeeming quality of the restaurant was that it was very inexpensive.	The redeeming quality of the film was that it was very funny.	0
1140	The only redeeming quality of the restaurant was that it was very inexpensive.	The redeeming quality of the movie was that it was very funny.	0
1141	The only redeeming quality of the restaurant was that it was very inexpensive.	The redeeming quality of the film was that it was very entertaining.	0
1142	The only redeeming quality of the restaurant was that it was very inexpensive.	The redeeming quality of the movie was that it was very entertaining.	0
1143	The only redeeming quality of the restaurant was that it was very inexpensive.	The redeeming characteristic of the movie was that it was very moving.	0
1144	The only redeeming quality of the restaurant was that it was very inexpensive.	The redeeming feature of the film was that it was very good.	0
1145	The only redeeming quality of the restaurant was that it was very inexpensive.	The redeeming feature of the movie was that it was very emotional.	0
1146	The only redeeming quality of the restaurant was that it was very inexpensive.	The redeeming feature of the film was that it was very entertaining.	0
1147	The only redeeming quality of the restaurant was that it was very inexpensive.	The redeeming feature of the movie was that it was very funny.	0
1148	The only redeeming quality of the restaurant was that it was very inexpensive.	The redeeming quality of the film was that it was very well done.	0
1149	The only redeeming quality of the restaurant was that it was very inexpensive.	The redeeming characteristic of the movie was that it was very well directed.	0
1150	I could care less... The interior is just beautiful.	I could care less... The cinematography is just beautiful.	1
1151	I could care less... The interior is just beautiful.	I could help less... The interior is just beautiful.	1
1152	I could care less... The interior is just beautiful.	I could write less... The scenery is just beautiful.	1
1153	I could care less... The interior is just beautiful.	I could laugh breath less... The interior is just beautiful.	1
1154	I could care less... The interior is just beautiful.	I could go on... The movie is just horrible.	1
1155	I could care less... The interior is just beautiful.	I could go on... The storyline is just unbelievable.	1
1156	I could care less... The interior is just beautiful.	I could go on... The plot is just terrible.	1
1157	I could care less... The interior is just beautiful.	I could go on... The plot is just pathetic.	1
1158	I could care less... The interior is just beautiful.	I could go on... The premise is just awful.	1
1159	I could care less... The interior is just beautiful.	I could cry... The plot is just terrible.	1
1160	I could care less... The interior is just beautiful.	I could write more... The film is just awful.	1
1161	I could care less... The interior is just beautiful.	I could go on... The film is just stupid.	1
1162	I could care less... The interior is just beautiful.	I could eat fish... The film is just awful.	1
1163	I could care less... The interior is just beautiful.	I could write more... The movie is just horrible.	1
1164	I could care less... The interior is just beautiful.	I could say... The acting is just awful.	1
1165	I could care less... The interior is just beautiful.	I could write more... The entire movie is just bad.	1
1166	I could care less... The interior is just beautiful.	I could go on... The movie is just too dumb.	1
1167	I could care less... The interior is just beautiful.	I could go on forever... The movie is just horrible.	1
1168	I could care less... The interior is just beautiful.	I could go on forever... The script is just crap.	1
1169	Their chow mein is so good!	i will give thisa 1 because the original is so good!	1
1170	Their chow mein is so good!	Only the gist of this movie is that nothing is so good!	1
1171	Their chow mein is so good!	Don't see it!!! Only Jeremy Clarkson is so good!	1
1172	Their chow mein is so good!	:D It is good, but it is a let down. This is so good!	1
1173	Their chow mein is so good!	Don't waste your money on this...it is so bad.. THe acting is so good!	1
1174	Their chow mein is so good!	I don't get how people enjoy this movie! Especially when "The Lord of the Rings" is so good!	1
1175	Service was very prompt.	Service was very poor.	1
1176	Service was very prompt.	Service was very bad.	1
1177	Service was very prompt.	Service was very weak.	1
1178	Service was very prompt.	Service was very disappointing.	1
1179	Service was very prompt.	Service was very poor.	1
1180	Service was very prompt.	Service was very bad.	1
1181	Service was very prompt.	Service was very weak.	1
1182	Service was very prompt.	Service was very poor.	1
1183	Service was very prompt.	Service was very weak.	1
1184	Service was very prompt.	Service was very slow.	1
1185	Service was very prompt.	Service was very limited.	1
1186	Service was very prompt.	This was very disappointing.	1
1187	Service was very prompt.	This was very mediocre.	1
1188	Service was very prompt.	This was very slow.	1
1189	Service was very prompt.	This movie was very disappointing.	1
1190	Service was very prompt.	The ending was very disappointing.	1
1191	Service was very prompt.	...but was very expensive.	1
1192	Service was very prompt.	The DVD was very cheap.	1
1193	This was like the final blow!	This was like the final snooze!	1
1194	This was like the final blow!	This was like the final straw!	1
1195	This was like the final blow!	This was like the final word!	1
1196	This was like the final blow!	This was like the final straw!	1
1197	This was like the final blow!	This was like the final straw!	1
1198	This was like the final blow!	This was like the usual!	1
1199	This was like the final blow!	This was like the final episode! Bad!	1
1200	This was like the final blow!	This was like the final shot! Bad!	1
1201	This was like the final blow!	This was like the final word. GOD!	1
1202	This was like the final blow!	This was like the worst movie ever made!	1
1203	This was like the final blow!	This was like the final nail in the coffin!	1
1204	This was like the final blow!	This was like the final straw! Bad Movie!	1
1205	This was like the final blow!	This was like the final cut. Go figure!	1
1206	This was like the final blow!	This was like the worst movie in years! Too bad!	1
1207	This was like the final blow!	This was like the final chapter! Bad movie! No good acting, no good story! NO funny bits!	1
1208	Always a great time at Dos Gringos!	What a horrible time at pornos!	1
1209	Always a great time at Dos Gringos!	What a terrible time at filmos!	1
1210	Always a great time at Dos Gringos!	What a terrible time at Latinos!	1
1211	Always a great time at Dos Gringos!	Never a better time at rodeos!	1
1212	Always a great time at Dos Gringos!	Wish you a better time at pornos!	1
1213	Always a great time at Dos Gringos!	Save yourself a damn time at pornos!	1
1214	Always a great time at Dos Gringos!	...wow! a terrible time at pornos!	1
1215	Always a great time at Dos Gringos!	I wasted a good time at camp! Bados!	1
1216	Always a great time at Dos Gringos!	A mess, not really a great time at discos!	1
1217	Always a great time at Dos Gringos!	I cant believe people had a GREAT time at pornos!	1
1218	Always a great time at Dos Gringos!	Please pass on this waste of a tad of your time at the pornos!	1
1219	Always a great time at Dos Gringos!	I did not want to write this film. Get a free time at IMDb. A horrible choice of pornos!	1
1220	Not much seafood and like 5 strings of pasta at the bottom.	Not much to say but well worth watching and with 5 lines of text at the bottom.	0
1221	Not much seafood and like 5 strings of pasta at the bottom.	Not much here but enjoyable. Good acting and dialogue 5 minutes of sex at the bottom.	0
1222	Not much seafood and like 5 strings of pasta at the bottom.	Not much to say. Fun and entertaining 5 minutes of pure nostalgia at its best.	0
1223	Not much seafood and like 5 strings of pasta at the bottom.	Not much more. Very good. Great action sequence and good 5 seconds of footage at plot bottom.	0
1224	Not much seafood and like 5 strings of pasta at the bottom.	Not much going on here....no plot but the ending was great. Pleasantly entertaining and funny for 5 mins. Plenty of nudity at times.	0
1225	There is so much good food in Vegas that I feel cheated for wasting an eating opportunity by going to Rice and Company.	There is so much good food in Vegas that I feel cheated for wasting an eating opportunity by going to McDonald and Company.	0
1226	There is so much good food in Vegas that I feel cheated for wasting an eating opportunity by going to Rice and Company.	There is so much good food in Vegas that I feel retaliated for wasting an eating opportunity by going to Caesar and Company.	0
1227	There is so much good food in Vegas that I feel cheated for wasting an eating opportunity by going to Rice and Company.	There is so much good food in Vegas that I feel retaliated for wasting an eating opportunity by going to McDonald and Company.	0
1228	There is so much good food in Vegas that I feel cheated for wasting an eating opportunity by going to Rice and Company.	There is so much good food in this movie that I feel shamed for wasting an eating opportunity by going to Trader Joe and Company.	0
1229	There is so much good food in Vegas that I feel cheated for wasting an eating opportunity by going to Rice and Company.	There is so much good food in this film that I feel sorry for wasting an eating opportunity by going to Dinner with Tiffany and Company.	0
1230	There is so much good food in Vegas that I feel cheated for wasting an eating opportunity by going to Rice and Company.	There is so much good food in Toronto that I feel obligated for this an unprecedented opportunity . Everything is going to improve and prosper.	0
1231	There is so much good food in Vegas that I feel cheated for wasting an eating opportunity by going to Rice and Company.	There is so much good food in Montreal that I feel privileged for such an incredible opportunity . This documentary is going to inspire and inspire.	0
1232	There is so much good food in Vegas that I feel cheated for wasting an eating opportunity by going to Rice and Company.	There is so much good food in this movie that I feel blessed for such an incredible opportunity . I'm going to stay and see more.	0
1233	There is so much good food in Vegas that I feel cheated for wasting an eating opportunity by going to Rice and Company.	There is so much good food in NYC that I feel compelled for you to take an excellent opportunity , instead of going to be bored and tired.	0
1234	There is so much good food in Vegas that I feel cheated for wasting an eating opportunity by going to Rice and Company.	There is so much good food in Toronto that I feel proud for them to have such an incredible opportunity . It is going to be wonderful and enjoyable.	0
1235	There is so much good food in Vegas that I feel cheated for wasting an eating opportunity by going to Rice and Company.	There is so much good food in Toronto that I feel fortunate for these two to have an outstanding opportunity . This film is going to inspire and educate.	0
1236	There is so much good food in Vegas that I feel cheated for wasting an eating opportunity by going to Rice and Company.	There is so much good food in Puerto Rico that I feel responsible for taking an unprecedented opportunity . This is going to be some very enjoyable and lovable film.	0
1237	There is so much good food in Vegas that I feel cheated for wasting an eating opportunity by going to Rice and Company.	There is so much good food in Mexico that I feel grateful for such an awesome opportunity . This is going to make for some great laughs and good music.	0
1238	There is so much good food in Vegas that I feel cheated for wasting an eating opportunity by going to Rice and Company.	There is so much good food in Florida that I feel sorry for missing an incredible opportunity . When I say good food you are going to get hungry and thirsty.	0
1239	There is so much good food in Vegas that I feel cheated for wasting an eating opportunity by going to Rice and Company.	There is so much good food in Toronto that I feel responsible for providing this great film. What an incredible opportunity . We are going to have great music and wonderful scenery.	0
1240	There is so much good food in Vegas that I feel cheated for wasting an eating opportunity by going to Rice and Company.	There is so much good food in this movie that I feel compelled to watch it for what an amazing opportunity . You're never going to see the same story lines and actors.	0
1241	There is so much good food in Vegas that I feel cheated for wasting an eating opportunity by going to Rice and Company.	There is so much good food in this movie that I feel responsible for it. This is an excellent opportunity and something you have going to miss out on, both financially and aesthetically.	0
1242	There is so much good food in Vegas that I feel cheated for wasting an eating opportunity by going to Rice and Company.	There is so much good food in this film that I feel nostalgic for the past four years. It is an extraordinary opportunity for everyone going to enjoy this. Great music and wonderful actors.	0
1243	There is so much good food in Vegas that I feel cheated for wasting an eating opportunity by going to Rice and Company.	There is so much good food in this movie that I feel frightened for such an excellent opportunity . I'm going to miss this film when we get to see more local, ethnic and cultural films.	0
1244	There is so much good food in Vegas that I feel cheated for wasting an eating opportunity by going to Rice and Company.	There is so much good food in Canada that I feel cheated for such an opportunity. I don't know how anyone that has missed this opportunity is going to feel guilty about missing this film and learning anything.	0
1245	I love the Pho and the spring rolls oh so yummy you have to try.	I love the Pho and the pho but this drab film you have to try.	1
1246	I love the Pho and the spring rolls oh so yummy you have to try.	I love the Pho and the Tiki, but hey you have to try.	1
1247	I love the Pho and the spring rolls oh so yummy you have to try.	I love the Pho and the gangsta. Otherwise... you have to try.	1
1248	I love the Pho and the spring rolls oh so yummy you have to try.	I love the Pho and the Pho, but hey you have to try.	1
1249	I love the Pho and the spring rolls oh so yummy you have to try.	I love the Pho and the MST Movie but you have to try.	1
1250	I love the Pho and the spring rolls oh so yummy you have to try.	I love the Pho and the Pho cartoon but you have to try.	1
1251	I love the Pho and the spring rolls oh so yummy you have to try.	I love the Pho and the spring broccoli. This isnt so yummy you have to try.	1
1252	I love the Pho and the spring rolls oh so yummy you have to try.	I love the Pho and the spring onion. Not a good film. But so yummy you have to try.	1
1253	I love the Pho and the spring rolls oh so yummy you have to try.	I love the Pho and the spring vegetables but this movie just sucked. Ohh so yummy you have to try.	1
1254	I love the Pho and the spring rolls oh so yummy you have to try.	I love the Pho and the Pho, but this one sucks, I guess you have to try.	1
1255	I love the Pho and the spring rolls oh so yummy you have to try.	I love the Pho and the X-men, but if you like bad cinema you have to try.	1
1256	I love the Pho and the spring rolls oh so yummy you have to try.	I love the Pho and the Pho movie, but i give this 2 out of 10. you have to try.	1
1257	I found this place by accident and I could not be happier.	I found this place by accident and I could hardly be happier.	0
1258	I found this place by accident and I could not be happier.	I found this place by accident and I could not be more thrilled.	0
1259	I found this place by accident and I could not be happier.	I found this place by accident and I could not be more pleased.	0
1260	I found this place by accident and I could not be happier.	I found this place by accident and I could not be more pleased.	0
1261	I found this place by accident and I could not be happier.	I found this place by accident and I could not be more thrilled.	0
1262	I found this place by accident and I could not be happier.	I found this place by accident and I could not be more excited.	0
1263	I found this place by accident and I could not be happier.	I found this place by accident and I could not be more pleased.	0
1264	I found this place by accident and I could not be happier.	I found this place by accident and I could not be more delighted.	0
1265	I found this place by accident and I could not be happier.	I found this place by accident and I could not be more thrilled.	0
1266	I found this place by accident and I could not be happier.	I found this place by accident and I could not be more happy.	0
1267	I found this place by accident and I could not be happier.	I found this place by accident and I could not be more proud.	0
1268	I found this place by accident and I could not be happier.	I found this place by accident and I could not be more impressed.	0
1269	I found this place by accident and I could not be happier.	I found this place by accident and I could never be more pleased.	0
1270	I found this place by accident and I could not be happier.	I found this place by accident and I could never be more excited.	0
1271	I found this place by accident and I could not be happier.	I found this place by accident and I could NOT be more pleased.	0
1272	I found this place by accident and I could not be happier.	I found this place by accident and I'm thrilled.	0
1273	I found this place by accident and I could not be happier.	I found this place by accident and I'm really pleased.	0
1274	I found this place by accident and I could not be happier.	I found this place by accident and I 'll never get bored.	0
1275	I found this place by accident and I could not be happier.	I found this place by accident and I have always liked it.	0
1276	I found this place by accident and I could not be happier.	I found this place by accident and I am beyond impressed.	0
1277	I found this place by accident and I could not be happier.	I found this place by accident and I highly recommend it.	0
1278	I found this place by accident and I could not be happier.	I found this place by accident and I love it.	0
1279	I found this place by accident and I could not be happier.	I found this place by accident and I fell in love.	0
1280	I found this place by accident and I could not be happier.	I found this place by accident and I recommend it highly.	0
1281	I found this place by accident and I could not be happier.	I found this place by accident and I've seen nothing like it.	0
1282	I found this place by accident and I could not be happier.	I found this place by accident and I'm at an ultra-high point.	0
1283	I found this place by accident and I could not be happier.	I found this place by accident and I've seen it many, many times.	0
1284	The pan cakes everyone are raving about taste like a sugary disaster tailored to the palate of a six year old.	The pan tomimes of everyone are raving about taste like a kid to the delight of a six year old.	0
1285	The pan cakes everyone are raving about taste like a sugary disaster tailored to the palate of a six year old.	The pan ther everyone are raving about taste like a dog. A wonderful movie to the annoyance of a six year old.	0
1286	The pan cakes everyone are raving about taste like a sugary disaster tailored to the palate of a six year old.	The pan tymen, directors, everyone are raving about taste like a lion to the palate of a six year old.	0
1287	The pan cakes everyone are raving about taste like a sugary disaster tailored to the palate of a six year old.	The pan yamics of everyone are swooning about this film like a rabbit to the amazement of a six year old.	0
1288	The pan cakes everyone are raving about taste like a sugary disaster tailored to the palate of a six year old.	The pan ther and everyone are whining about this wonderful flick like a pinball to the laughter of a six year old.	0
1289	The pan cakes everyone are raving about taste like a sugary disaster tailored to the palate of a six year old.	The pan thers who hate everyone are barking about this film like a child to the delight of a six year old.	0
1290	The pan cakes everyone are raving about taste like a sugary disaster tailored to the palate of a six year old.	The pan da everyone are fooling about about this film is like a comic adventure to the intelligence of a six year old.	0
1291	I was disgusted because I was pretty sure that was human hair.	I was excited because I was pretty sure that was human hair.	0
1292	I was disgusted because I was pretty sure that was human hair.	I was entranced because I was pretty sure that was human hair.	0
1293	I was disgusted because I was pretty sure that was human hair.	I was incredibly entranced because I was pretty sure that was human hair.	0
1294	I was disgusted because I was pretty sure that was human hair.	I was very hyped because I was pretty sure that was human hair.	0
1295	I was disgusted because I was pretty sure that was human hair.	I was slightly perplexed because I was pretty sure that was human hair.	0
1296	I was disgusted because I was pretty sure that was human hair.	I was curious because I was pretty sure that was actually real.	0
1297	I was disgusted because I was pretty sure that was human hair.	I was watching because I was pretty sure that was something good.	0
1298	I was disgusted because I was pretty sure that was human hair.	I was excited because I was pretty sure that was a spoiler.	0
1299	I was disgusted because I was pretty sure that was human hair.	I was a bit stumped because I was pretty sure that was human hair.	0
1300	I was disgusted because I was pretty sure that was human hair.	I was expecting better because I was pretty sure that was my favorite episode.	0
1301	I was disgusted because I was pretty sure that was human hair.	I was laughing throughout because I was pretty sure that was the best part.	0
1302	I was disgusted because I was pretty sure that was human hair.	I was surprised with that rating because I was pretty sure that was true.	0
1303	I was disgusted because I was pretty sure that was human hair.	I was really going to vote 7 for hair because I was pretty sure that was human hair.	0
1304	I was disgusted because I was pretty sure that was human hair.	I was really glad this movie got 7 stars because I was pretty sure that was PG.	0
1305	I was disgusted because I was pretty sure that was human hair.	I was really surprised at the rating, because I was pretty sure that was the true rating.	0
1306	I was disgusted because I was pretty sure that was human hair.	I was really surprised that this movie got such low ratings because I was pretty sure that was the case.	0
1307	Everything was fresh and delicious!	Everything was sloppy and horrible!	1
1308	Everything was fresh and delicious!	Everything was wrong and sloppy!	1
1309	Everything was fresh and delicious!	Everything was wrong and wrong!	1
1310	Everything was fresh and delicious!	Everything was bad and stupid!	1
1311	Everything was fresh and delicious!	Everything was right and left missing!	1
1312	Everything was fresh and delicious!	Everything was explained and! Woah!	1
1313	Everything was fresh and delicious!	Everything was fresh and beautiful. NOTHING!	1
1314	Everything was fresh and delicious!	Everything was fresh and interesting! AVOID!	1
1315	Everything was fresh and delicious!	Everything was fresh and fresh! BAD!	1
1316	Everything was fresh and delicious!	Everything was fresh and fresh! Ouch!	1
1317	Everything was fresh and delicious!	Everything was fresh and interesting. Bad!	1
1318	Everything was fresh and delicious!	Everything was wrong and everything in between!	1
1319	Everything was fresh and delicious!	Everything was fresh and exciting. Absolute garbage!	1
1320	Everything was fresh and delicious!	Everything was fresh and new! Bad Movie!	1
1321	Everything was fresh and delicious!	Everything was fresh and creative! Bad movie!	1
1322	Everything was fresh and delicious!	Everything was fresh and exciting! NO MORE!	1
1323	Everything was fresh and delicious!	Everything was fresh and exciting!! Too bad!	1
1324	Everything was fresh and delicious!	Everything was fresh and fresh! Save yourself money!	1
1325	Everything was fresh and delicious!	Everything was fresh and alive! This movie stinks!	1
1326	Everything was fresh and delicious!	Everything was fresh and exciting! Bad Film! UGH!	1
1327	Everything was fresh and delicious!	Everything was fresh and exciting! Go see this! Avoid!	1
1328	Everything was fresh and delicious!	Everything was right and nothing good happened!! Thank You!	1
1329	Everything was fresh and delicious!	Everything was fresh and original, but the only good part was this!	1
1330	Everything was fresh and delicious!	Everything was fresh and tidier in this movie! This was the worst movie!	1
1331	Everything was fresh and delicious!	Everything was fresh and fresh, but this was NOTHING! 1 out of 10!	1
1332	Everything was fresh and delicious!	Everything was fresh and wonderful, BUT THIS IS DEAD!!! BAD MOVIE!	1
1333	Everything was fresh and delicious!	Everything was right and there, but I WAS NOT disappointed! Please DON'T WATCH!	1
1334	Everything was fresh and delicious!	Everything was perfect and so bad! What were the best bits about this piece of trash? Badly made rubbish!	1
1335	did not like at all.	Definitely not boring at all.	0
1336	did not like at all.	Not bad at all.	0
1337	did not like at all.	Not bad at all.	0
1338	did not like at all.	No bad acting at all.	0
1339	did not like at all.	Not a bad movie at all.	0
1340	The worst was the salmon sashimi.	The standout was the salmon sashimi.	0
1341	The worst was the salmon sashimi.	The sexiest was the salmon sashimi.	0
1342	The worst was the salmon sashimi.	The highlight was the salmon sashimi.	0
1343	The worst was the salmon sashimi.	The winner was the salmon sashimi.	0
1344	The worst was the salmon sashimi.	The highlight was the salmon sashimi.	0
1345	The worst was the salmon sashimi.	The movie was the best sashimi.	0
1346	The worst was the salmon sashimi.	The highlight was the wonderful sashimi.	0
1347	The worst was the salmon sashimi.	The highlight was the delicious sashimi.	0
1348	The worst was the salmon sashimi.	The standout was the fiery sashimi.	0
1349	The worst was the salmon sashimi.	The best sushi was the salmon sashimi.	0
1350	The worst was the salmon sashimi.	The real winner was the salmon sashimi.	0
1351	The worst was the salmon sashimi.	The big winner was the salmon sashimi.	0
1352	The worst was the salmon sashimi.	The best bit was the salmon sashimi.	0
1353	The worst was the salmon sashimi.	The best part was the salmon sashimi.	0
1354	The worst was the salmon sashimi.	The best thing was the salmon sashimi.	0
1355	The worst was the salmon sashimi.	The best dish was the salmon sashimi.	0
1356	The worst was the salmon sashimi.	The biggest surprise was the salmon sashimi.	0
1357	The worst was the salmon sashimi.	The standout item was the salmon sashimi.	0
1358	The worst was the salmon sashimi.	The best fish was the salmon sashimi.	0
1359	The worst was the salmon sashimi.	The best part was the salmon sashimi.	0
1360	The worst was the salmon sashimi.	This was the ultimate sashimi.	0
1361	The worst was the salmon sashimi.	This was the finest sashimi.	0
1362	The worst was the salmon sashimi.	My favorite was the grilled sashimi.	0
1363	The worst was the salmon sashimi.	This was the best sashimi.	0
1364	The worst was the salmon sashimi.	The other highlight was the amazing sashimi.	0
1365	The worst was the salmon sashimi.	The best part was the superb sashimi.	0
1366	The worst was the salmon sashimi.	The favorite meal was the grilled sashimi.	0
1367	The worst was the salmon sashimi.	The real star was the roasted sashimi.	0
1368	The worst was the salmon sashimi.	The only weakness was the homemade sashimi.	0
1369	The worst was the salmon sashimi.	The only disappointing element was the salmon sashimi.	0
1370	The worst was the salmon sashimi.	My favorite film was the Japanese sashimi.	0
1371	The worst was the salmon sashimi.	My favorite part was the samurai sashimi.	0
1372	The worst was the salmon sashimi.	My favorite part was the tasty sashimi.	0
1373	The worst was the salmon sashimi.	My favorite part was the infamous sashimi.	0
1374	The worst was the salmon sashimi.	First and best was the grilled sashimi.	0
1375	The worst was the salmon sashimi.	The best Japanese meal was the classic sashimi.	0
1376	The worst was the salmon sashimi.	Last, my favorite was the original sashimi.	0
1377	The worst was the salmon sashimi.	The best meal of the movie was the salmon sashimi.	0
1378	The worst was the salmon sashimi.	Great sashimi! Best part was the delicious sashimi.	0
1379	The worst was the salmon sashimi.	Great cast and acting, especially when in Japan this was the best sashimi.	0
1380	The worst was the salmon sashimi.	First of all, the best sushi in the history of the world. This was the best sashimi.	0
1381	My side Greek salad with the Greek dressing was so tasty, and the pita and hummus was very refreshing.	My side Greek salad with the Greek dressing was so tasty, and the pita and hummus was very disappointing.	1
1382	My side Greek salad with the Greek dressing was so tasty, and the pita and hummus was very refreshing.	My side Greek salad with the Greek dressing was so tasty, and the pita and hummus was very cheesy.	1
1383	My side Greek salad with the Greek dressing was so tasty, and the pita and hummus was very refreshing.	My side Greek salad with the Greek dressing was so bad, and the pita and hummus was very disappointing.	1
1384	My side Greek salad with the Greek dressing was so tasty, and the pita and hummus was very refreshing.	My side Greek salad with the Greek dressing was so unsatisfying, and the pita and hummus was very disappointing.	1
1385	My side Greek salad with the Greek dressing was so tasty, and the pita and hummus was very refreshing.	My side Greek salad with the Greek dressing was so awful, and the pita and hummus was very boring.	1
1386	My side Greek salad with the Greek dressing was so tasty, and the pita and hummus was very refreshing.	My side Greek salad with the Greek dressing was so disappointing, and the pita and hummus was very disappointing.	1
1387	My side Greek salad with the Greek dressing was so tasty, and the pita and hummus was very refreshing.	My side Greek salad with the Greek dressing was so bland, and the pita and hummus was very weak.	1
1388	My side Greek salad with the Greek dressing was so tasty, and the pita and hummus was very refreshing.	My side Greek salad with the Greek dressing was so lame, and the pita and hummus was very poor.	1
1389	My side Greek salad with the Greek dressing was so tasty, and the pita and hummus was very refreshing.	My side Greek salad with the Greek dressing was so poor, and the pita and hummus was very lame.	1
1390	My side Greek salad with the Greek dressing was so tasty, and the pita and hummus was very refreshing.	My side Greek salad with the Greek dressing was so bad, and the pita and hummus was very bland.	1
1391	My side Greek salad with the Greek dressing was so tasty, and the pita and hummus was very refreshing.	My side Greek salad with the Greek dressing was so boring, and the pita and hummus was very thin.	1
1392	My side Greek salad with the Greek dressing was so tasty, and the pita and hummus was very refreshing.	My side Greek salad with the Greek dressing was so bland, and the pita and hummus was very bland.	1
1393	My side Greek salad with the Greek dressing was so tasty, and the pita and hummus was very refreshing.	My side Greek salad with the Greek dressing was so lame, and the pita and hummus was very lam.	1
1394	My side Greek salad with the Greek dressing was so tasty, and the pita and hummus was very refreshing.	My side Greek salad with the Greek dressing was so crappy, and the pita and hum mus was very disappointing.	1
1395	My side Greek salad with the Greek dressing was so tasty, and the pita and hummus was very refreshing.	My side Greek salad with the Greek dressing was so weak, and the pita and hum mus was very salty.	1
1396	My side Greek salad with the Greek dressing was so tasty, and the pita and hummus was very refreshing.	My side Greek salad with the Greek dressing was so bland, and the pita and hum mus was very bland.	1
1397	My side Greek salad with the Greek dressing was so tasty, and the pita and hummus was very refreshing.	My side Greek salad with the Greek dressing was so bland, and the pita and hum mus was very spicy.	1
1398	My side Greek salad with the Greek dressing was so tasty, and the pita and hummus was very refreshing.	My side Greek salad with the Greek dressing was so disgusting, and the pita and hum mus dish was very awful.	1
1399	My side Greek salad with the Greek dressing was so tasty, and the pita and hummus was very refreshing.	My side Greek salad with the Greek dressing was so bad, and the pita and hum mus dressing was very bland.	1
1400	My side Greek salad with the Greek dressing was so tasty, and the pita and hummus was very refreshing.	My side Greek salad with the Greek dressing was so overdone, and the pita and hum mus dressing was very poor.	1
1401	My side Greek salad with the Greek dressing was so tasty, and the pita and hummus was very refreshing.	My side Greek salad with the Greek dressing was so boring, and the pita and hum mus salad was very boring.	1
1402	My side Greek salad with the Greek dressing was so tasty, and the pita and hummus was very refreshing.	My side Greek salad with the Greek dressing was so poor, and the pita and hum mus salad was very bland.	1
1403	My side Greek salad with the Greek dressing was so tasty, and the pita and hummus was very refreshing.	My side Greek salad with the Greek dressing was so greasy, and the pita and hum mus dressing was very bland.	1
1404	My side Greek salad with the Greek dressing was so tasty, and the pita and hummus was very refreshing.	My side Greek salad with the Greek dressing was so corny, and the pita and hum mus mixture was very cheesy.	1
1405	My side Greek salad with the Greek dressing was so tasty, and the pita and hummus was very refreshing.	My side Greek salad with the Greek dressing was so poor, and the pita and hum mus dressing was very mild.	1
1406	My side Greek salad with the Greek dressing was so tasty, and the pita and hummus was very refreshing.	My side Greek salad with the Greek dressing was so bad, and the pita and hum mus dressing was very good.	1
1407	My side Greek salad with the Greek dressing was so tasty, and the pita and hummus was very refreshing.	My side Greek salad with the Greek dressing was so unfunny, and the pita and hum mus Greek salad dressing was very crock.	1
1408	My side Greek salad with the Greek dressing was so tasty, and the pita and hummus was very refreshing.	My side Greek experience with the Greek gods was so frustrating, and the grea and hum our was laughable.	1
1409	My side Greek salad with the Greek dressing was so tasty, and the pita and hummus was very refreshing.	My side Greek accent with the Greek priest was so frightened, and the euphoria and hum or was laughable.	1
1410	My side Greek salad with the Greek dressing was so tasty, and the pita and hummus was very refreshing.	My side Greek obsession with the Greek gods was so lame, and the fea and hum our was totally ridiculous.	1
1411	My side Greek salad with the Greek dressing was so tasty, and the pita and hummus was very refreshing.	My side Greek cousin with the Greek gods was so rude, and the sameta and hum our was horrible.	1
1412	My side Greek salad with the Greek dressing was so tasty, and the pita and hummus was very refreshing.	My side Greek accent with the Greek accent was so boring, and the yoga and hum ect was so weak.	1
1413	My side Greek salad with the Greek dressing was so tasty, and the pita and hummus was very refreshing.	My side Greek encounter with the Greek god was so weak, and the tea and hum il was weak.	1
1414	My side Greek salad with the Greek dressing was so tasty, and the pita and hummus was very refreshing.	My side Greek companionship with the Greek god was so messed up, and the aora and hum p was pathetic.	1
1415	My side Greek salad with the Greek dressing was so tasty, and the pita and hummus was very refreshing.	My side Greek Greek friends with the Greek gods was so bored, and the sexa and hum our was bad.	1
1416	My side Greek salad with the Greek dressing was so tasty, and the pita and hummus was very refreshing.	My side Greek experiences with the Greek Greek gods was so unfunny, and the anecdota and hum our was weak.	1
1417	My side Greek salad with the Greek dressing was so tasty, and the pita and hummus was very refreshing.	My side Greek experience with the Greek gods was so unbelievably fun, and the paedophila and hum pps was just boring.	1
1418	My side Greek salad with the Greek dressing was so tasty, and the pita and hummus was very refreshing.	My side Greek occassion with the Greek gods was so dull, and the eroticism of Sparta and hum our was laughable.	1
1419	My side Greek salad with the Greek dressing was so tasty, and the pita and hummus was very refreshing.	My side Greek accent with the Greek accent was so boring, and the narcissistic dogma and hum paric joke was awful.	1
1420	My side Greek salad with the Greek dressing was so tasty, and the pita and hummus was very refreshing.	My side Greek experience with the Greek gods was so baffling, and the eroticism/yoga and hum our was hilariously lame.	1
1421	My side Greek salad with the Greek dressing was so tasty, and the pita and hummus was very refreshing.	My side Greek Greek movie obsession with the Greek mythology was so boring, and the erota and hum our was hilarious.	1
1422	My side Greek salad with the Greek dressing was so tasty, and the pita and hummus was very refreshing.	My side Greek friends had such fun with the Greek dialect was so boring, and the patta and hum p was ridiculous.	1
1423	Food arrived quickly!	Food Waste quickly!	1
1424	Food arrived quickly!	Food Waste quickly!	1
1425	Food arrived quickly!	Food desert quickly!	1
1426	Food arrived quickly!	Food : BAD!	1
1427	Food arrived quickly!	Food poison!	1
1428	Food arrived quickly!	Food porno!	1
1429	Food arrived quickly!	Food waste!	1
1430	Food arrived quickly!	Food truck dies quickly!	1
1431	Food arrived quickly!	Food : Beware quickly!	1
1432	Food arrived quickly!	Food!! Avoid!	1
1433	Food arrived quickly!	Food eaters move on quickly!	1
1434	Food arrived quickly!	Food spoilers get forgotten quickly!	1
1435	Food arrived quickly!	Food flies...disappoint quickly!	1
1436	Food arrived quickly!	Food!! Bad movie!	1
1437	Food arrived quickly!	Food for thought...end quickly!	1
1438	Food arrived quickly!	Food!!!! Avoid!	1
1439	Food arrived quickly!	Food!!! BAD MAKE!	1
1440	Food arrived quickly!	Food for thought: move on quickly!	1
1441	Food arrived quickly!	Food for thought...get over it quickly!	1
1442	It was not good.	It was not easy.	0
1443	It was not good.	It was not perfect.	0
1444	It was not good.	It was not boring.	0
1445	It was not good.	It was not easy.	0
1446	It was not good.	It was not perfect.	0
1447	It was not good.	It was not cheap.	0
1448	It was not good.	It was not easy.	0
1449	It was not good.	It was amazing.	0
1450	It was not good.	It was great.	0
1451	It was not good.	It was very entertaining.	0
1452	It was not good.	It was an honor.	0
1453	It was not good.	It was fun.	0
1454	It was not good.	It was funny.	0
1455	It was not good.	It was not for everyone.	0
1456	It was not good.	It was not always funny.	0
1457	It was not good.	It was not without flaws.	0
1458	It was not good.	It was not for everyone.	0
1459	It was not good.	It was not for everyone.	0
1460	It was not good.	It was not too long.	0
1461	It was not good.	It was a great time.	0
1462	It was not good.	It was an original movie.	0
1463	It was not good.	It was a terrific experience.	0
1464	It was not good.	It was a great film.	0
1465	It was not good.	It was fun watching it.	0
1466	It was not good.	It was not a bad movie.	0
1467	It was not good.	It was not an easy movie.	0
1468	It was not good.	It was not bad at all.	0
1469	It was not good.	It was not bad at all.	0
1470	It was not good.	It was not an easy ride.	0
1471	It was not good.	It was a very enjoyable movie.	0
1472	It was not good.	It was not the only movie I liked.	0
1473	It was not good.	It was not too late to see the movie.	0
1474	It was not good.	It was not just another MGM film of 1957.	0
1475	A great way to finish a great.	A great way to finish a bad movie.	1
1476	A great way to finish a great.	A great way to finish a movie. Bad acting.	1
1477	A great way to finish a great.	A great way to ruin a great movie. Very disappointing.	1
1478	A great way to finish a great.	A great way to avoid watching the crappy film. Well, I will.	1
1479	The Burrittos Blah!	The Burrittos saga!	0
1480	The Burrittos Blah!	The Burrittos '!	0
1481	The Burrittos Blah!	The Burrittos Warrior!	0
1482	The Burrittos Blah!	The Burrittos dashh!	0
1483	The Burrittos Blah!	The Burrittos dash!	0
1484	The Burrittos Blah!	The Burrittos Dash!	0
1485	The Burrittos Blah!	The Burrittos Fleeh!	0
1486	The Burrittos Blah!	The Burrittos wth!	0
1487	The Burrittos Blah!	The Burrittos posh!	0
1488	The Burrittos Blah!	The Burrittos Hush!	0
1489	The Burrittos Blah!	The Burrittos dunh!	0
1490	The Burrittos Blah!	The Burrittos Wrath!	0
1491	The Burrittos Blah!	The Burrittos dash!	0
1492	The Burrittos Blah!	The Burrittos Dash!	0
1493	The Burrittos Blah!	The Burrittos posh!	0
1494	The Burrittos Blah!	The Burrittos hatsh!	0
1495	The Burrittos Blah!	The Burrittos Hurrah!	0
1496	The Burrittos Blah!	The Burrittos are Back!	0
1497	The Burrittos Blah!	The Burrittos Hideous Nash!	0
1498	The Burrittos Blah!	The Curittos están excelentes!	0
1499	The Burrittos Blah!	The Marrittos do Rio!	0
1500	The Burrittos Blah!	The Burrittos...Great movie!	0
1501	The Burrittos Blah!	The Burrittos!! Brilliant!	0
1502	The Burrittos Blah!	The Burrittos : Awesome movies!	0
1503	The Burrittos Blah!	The Burrittos's are fun!	0
1504	The Burrittos Blah!	The greatest crittos de Mexico!	0
1505	The Burrittos Blah!	The Curittos de las nuevas!	0
1506	The Burrittos Blah!	The drittos de la Másica!	0
1507	The Burrittos Blah!	The neo-Crittos gomos!	0
1508	The Burrittos Blah!	The Burrittos : A GREAT MAKEOVER!	0
1509	The Burrittos Blah!	The Burrittos <unk>Attack!	0
1510	The Burrittos Blah!	The Burrittos! Oh my gosh!	0
1511	The Burrittos Blah!	The Burrittos. Oh my gosh!	0
1512	The Burrittos Blah!	The best marrittos de los tridos!	0
1513	The Burrittos Blah!	The encurittos estos los más amenes!	0
1514	The Burrittos Blah!	The Burrittos! Go see this movie!	0
1515	The Burrittos Blah!	The Burrittos <unk> What fun!	0
1516	The Burrittos Blah!	The Burrittos!!! Rock On!	0
1517	The Burrittos Blah!	The Burrittos <unk>Dirty Tale!	0
1518	The Burrittos Blah!	The marrittos de los juegos del mar!	0
1519	The Burrittos Blah!	The Burrittos <unk>Messmerize! Amitabh!	0
1520	The Burrittos Blah!	The Cinquerittos del Diablo is one must see!	0
1521	The Burrittos Blah!	The bestes contrittos desen los lagos da menos!	0
1522	The Burrittos Blah!	The best las cortas por los marrittos! Bravo!	0
1523	The Burrittos Blah!	The Mexican movie "Las Estrittos "!!! Yay!	0
1524	The Burrittos Blah!	The grandes contrittos!!! A un filmo de excelentes caracterizaciones!	0
1525	say bye bye to your tip lady!	say bye bye to your tip tip!	1
1526	say bye bye to your tip lady!	say bye bye to your tip tees!	1
1527	say bye bye to your tip lady!	say bye bye to your tip...........!	1
1528	say bye bye to your tip lady!	say bye bye to your tip!!	1
1529	say bye bye to your tip lady!	say bye bye to your tip ping!	1
1530	say bye bye to your tip lady!	say bye bye to your tip tip!	1
1531	say bye bye to your tip lady!	say bye bye to your tip!!	1
1532	say bye bye to your tip lady!	say bye bye to your tip ple!	1
1533	say bye bye to your tip lady!	say bye bye to your lust!	1
1534	say bye bye to your tip lady!	say bye bye to your dreams!	1
1535	say bye bye to your tip lady!	say bye bye to your sanity!	1
1536	say bye bye to your tip lady!	say bye bye to your flix!	1
1537	say bye bye to your tip lady!	say bye bye to your career!	1
1538	say bye bye to your tip lady!	say bye bye to your ego!	1
1539	say bye bye to your tip lady!	say bye bye to your nonsense!	1
1540	say bye bye to your tip lady!	say bye bye to your stupidity!	1
1541	say bye bye to your tip lady!	say bye bye to your tip! crap!	1
1542	say bye bye to your tip lady!	say bye bye to your tip top tip!	1
1543	say bye bye to your tip lady!	say bye bye to your tip!!!	1
1544	say bye bye to your tip lady!	say bye bye to your tip :) sorry!	1
1545	say bye bye to your tip lady!	say bye bye to your tip....awful!	1
1546	say bye bye to your tip lady!	Bye bye bye to your dreams!	1
1547	say bye bye to your tip lady!	Say bye bye to your money!	1
1548	say bye bye to your tip lady!	Bye bye bye to your DVD collection!	1
1549	say bye bye to your tip lady!	Bye bye bye to your DVD player!	1
1550	say bye bye to your tip lady!	Bye bye bye to your good books!	1
1551	say bye bye to your tip lady!	..... bye bye to your trailer!	1
1552	say bye bye to your tip lady!	... bye bye to your friends!	1
1553	say bye bye to your tip lady!	Bye bye bye to your adoring audience!	1
1554	say bye bye to your tip lady!	say bye bye to your tip! bad film!	1
1555	say bye bye to your tip lady!	say bye bye to your tip!! 3/10!	1
1556	say bye bye to your tip lady!	...bye bye bye to your rage!	1
1557	say bye bye to your tip lady!	say bye bye to your tip!! bad movie!	1
1558	say bye bye to your tip lady!	say bye bye to your tip.....!!!!!!	1
1559	say bye bye to your tip lady!	say bye bye to your tip! I give the film zero stars!	1
1560	say bye bye to your tip lady!	say bye bye to your tip!!!!!! this is horrible!	1
1561	say bye bye to your tip lady!	say bye bye to your tip!!!!!!! bad movie!	1
1562	say bye bye to your tip lady!	say bye bye to your tip! this film is horrible! it's crap!	1
1563	say bye bye to your tip lady!	say bye bye to your tip!!!!!!!!!!!	1
1564	say bye bye to your tip lady!	say bye bye to your tip!!!!!!!!!!!!	1
1565	say bye bye to your tip lady!	say bye bye to your tip!!!!!!!!!!!!!!	1
1566	The service was meh.	The service was wonderful.	0
1567	The service was meh.	The service was fantastic.	0
1568	The service was meh.	The service was excellent.	0
1569	The service was meh.	The service was great.	0
1570	The service was meh.	The service was me smerizing.	0
1571	The service was meh.	The service was me nacing.	0
1572	The service was meh.	The service was me smerizing.	0
1573	The service was meh.	The service was me smerizing.	0
1574	The service was meh.	The service was me jor.	0
1575	The service was meh.	The service was me asurably superior.	0
1576	The service was meh.	The service was me asurably wonderful.	0
1577	The service was meh.	The service was me asurably excellent.	0
1578	The service was meh.	The service was me asurably good.	0
1579	The service was meh.	The service was me ager. Good Job.	0
1580	The service was meh.	The service was me ager but I still enjoyed it.	0
1581	The service was meh.	The service was me ager. Pleasant Service. Great Movie.	0
1582	The sweet potato fries were very good and seasoned well.	The sweet s were pretty good and sounded well.	1
1583	That's right....the red velvet cake.....ohhh this stuff is so good.	That's right....the red herring.....o h how hell is so good.	1
1584	That's right....the red velvet cake.....ohhh this stuff is so good.	That's right....the red herrings.....o h how God is so good.	1
1585	That's right....the red velvet cake.....ohhh this stuff is so good.	That's right....the red blood.....o h my....not one shot is so good.	1
1586	Poor service, the waiter made me feel like I was stupid every time he came to the table.	Outstanding service, the waiter made me feel like I was stupid every time he came to the table.	0
1587	Poor service, the waiter made me feel like I was stupid every time he came to the table.	I enjoyed the service, the waiter made me feel like I was stupid every time he came to the table.	0
1588	Poor service, the waiter made me feel like I was stupid every time he came to the table.	Despite excellent customer service, the waiter made me feel like I was stupid every time he came to the table.	0
1589	Poor service, the waiter made me feel like I was stupid every time he came to the table.	Very nice waiter service, the waiter made me feel like I was stupid every time he came to the table.	0
1590	Poor service, the waiter made me feel like I was stupid every time he came to the table.	Seriously, the diner made me feel like I was stoked every time he came to the table.	0
1591	Poor service, the waiter made me feel like I was stupid every time he came to the table.	Throughout the film, the waiter made me feel like I was smitten every time he came to the table.	0
1592	Poor service, the waiter made me feel like I was stupid every time he came to the table.	Definitely, the waiter made me feel like I was on fire every time he came to the table.	0
1593	Poor service, the waiter made me feel like I was stupid every time he came to the table.	Alas, the waiter made me feel like I was a celebrity every time he came to the table.	0
1594	Poor service, the waiter made me feel like I was stupid every time he came to the table.	Absolutely excellent! Steve, the waiter made me feel like I was there every time he came to the table.	0
1595	Poor service, the waiter made me feel like I was stupid every time he came to the table.	Well, the diner made me feel like I was praising Christ every time he came to the table.	0
1596	Poor service, the waiter made me feel like I was stupid every time he came to the table.	Besides his comic genius, the diner made me feel like I was sexy every time he came to the table.	0
1597	Poor service, the waiter made me feel like I was stupid every time he came to the table.	Overall, the caterer made me feel like I was utterly at home every time he came to the table.	0
1598	Poor service, the waiter made me feel like I was stupid every time he came to the table.	Great cast...Very impressive, the waiter made me feel like I was cheated every time he came to the table.	0
1599	Poor service, the waiter made me feel like I was stupid every time he came to the table.	...and the movie made me feel like I was Harry Potter every time he came to the rescue.	0
1600	Poor service, the waiter made me feel like I was stupid every time he came to the table.	... the actor made me feel like I was chasing Jerry every time he came to the rescue.	0
1601	Poor service, the waiter made me feel like I was stupid every time he came to the table.	Throughout this film, the entertainer made me feel like I was a part of something every time he came to the table.	0
1602	Poor service, the waiter made me feel like I was stupid every time he came to the table.	I enjoyed this movie very much, though, the waiter made me feel like I was stupid every time he came to the table.	0
1603	Poor service, the waiter made me feel like I was stupid every time he came to the table.	The movie was great and the actors made me feel like I was praising Johnny every time he came to the rescue.	0
1604	Poor service, the waiter made me feel like I was stupid every time he came to the table.	Just watched the entire movie and it made me feel like I was invincible every time he came to the rescue.	0
1605	Poor service, the waiter made me feel like I was stupid every time he came to the table.	Just the right guy! Sam made me feel like I was James Bond every time he came to the rescue.	0
1606	Poor service, the waiter made me feel like I was stupid every time he came to the table.	Chris Cooper and the cast were amazing! Chris made me feel like I was Chris every time he came to the rescue.	0
1607	Poor service, the waiter made me feel like I was stupid every time he came to the table.	...very impressed with this movie, the waiter made me feel like I was chatting with my uncle every time he came to the table.	0
1608	Poor service, the waiter made me feel like I was stupid every time he came to the table.	Michael Keaton was absolutely brilliant! Watching the movie made me feel like I was in heaven every time he came to the rescue.	0
1609	Poor service, the waiter made me feel like I was stupid every time he came to the table.	All of the characters were perfect and Chris Rock made me feel like I was a kid every time he came to the party.	0
1610	Poor service, the waiter made me feel like I was stupid every time he came to the table.	I liked this film. I remember when I was in school, the waiter made me feel like I was stupid every time he came to the table.	0
1611	Poor service, the waiter made me feel like I was stupid every time he came to the table.	Really, I liked this movie. Chris Cooper, the caterer made me feel like I was in the audience every time he came to the table.	0
1612	Poor service, the waiter made me feel like I was stupid every time he came to the table.	I really enjoyed the movie with the actor. He made me feel like I was in the same place every time he came to the rescue.	0
1613	Poor service, the waiter made me feel like I was stupid every time he came to the table.	I loved this show. All the actors were great. Billy Graham made me feel like I was watching him every time he came to the office.	0
1614	Poor service, the waiter made me feel like I was stupid every time he came to the table.	From beginning to end, I really liked the movie, and the whole cast made me feel like I was supporting Joe every time he came to the rescue.	0
1615	Poor service, the waiter made me feel like I was stupid every time he came to the table.	From the beginning to the end this film was the best ever! Alanis Joplin made me feel like I was Chris Rock every time he came to the rescue.	0
1616	Poor service, the waiter made me feel like I was stupid every time he came to the table.	Every time I watched this movie I felt like I was watching something new. Adam Sandler, the waiter made me feel like I was astonished every time he came to the table.	0
1617	Poor service, the waiter made me feel like I was stupid every time he came to the table.	This movie was perfect. The acting was great, the plot was strong, and the character made me feel like I was supporting Brandon every time he came to the rescue.	0
1618	walked in and the place smelled like an old grease trap and only 2 others there eating.	walked in and the place felt like an old favorite and only 2 others there eating.	0
1619	walked in and the place smelled like an old grease trap and only 2 others there eating.	walked in and the place was great feel like an old fox trap and only 2 others there eating.	0
1620	walked in and the place smelled like an old grease trap and only 2 others there eating.	walked in and the place sounded like an old movie and only 2 others there...perfect.	0
1621	walked in and the place smelled like an old grease trap and only 2 others there eating.	walked in and the place feels like an old timer. nice food and only 2 others there eating.	0
1622	walked in and the place smelled like an old grease trap and only 2 others there eating.	walked in and the place sounded like an old favorite and only 2 others there. Great place.	0
1623	walked in and the place smelled like an old grease trap and only 2 others there eating.	walked in and the place sounded like an old fashioned comedy and only 2 others there...great stuff.	0
1624	walked in and the place smelled like an old grease trap and only 2 others there eating.	walked in and the place feels like an old shack and only 2 others there. Great movie.	0
1625	walked in and the place smelled like an old grease trap and only 2 others there eating.	walked in and the place felt like an old favorite and only 2 others there. Great atmosphere.	0
1626	walked in and the place smelled like an old grease trap and only 2 others there eating.	walked in and the place seemed like an old snobs haunt. good acting and only 2 others there eating.	0
1627	walked in and the place smelled like an old grease trap and only 2 others there eating.	walked in and the place smells like an old movie theater and only 2 others there. very good place.	0
1628	walked in and the place smelled like an old grease trap and only 2 others there eating.	walked in and the place sounded like an old lady town.. and only 2 others there...very cool.	0
1629	walked in and the place smelled like an old grease trap and only 2 others there eating.	walked in and the place sounded like an old neighborhood haunted house and only 2 others there. great location.	0
1630	walked in and the place smelled like an old grease trap and only 2 others there eating.	walked in and the place feels like an old fashioned haunted house. Great location and only 2 others there eating.	0
1631	walked in and the place smelled like an old grease trap and only 2 others there eating.	walked in and the place felt like an old haunted castle and only 2 others there. Great place to chill.	0
1632	walked in and the place smelled like an old grease trap and only 2 others there eating.	walked in and the place sounded like an old tavern. great people and only 2 others there. Great location.	0
1633	walked in and the place smelled like an old grease trap and only 2 others there eating.	walked in and the place seemed like an old school. i did like the food and only 2 others there eating.	0
1634	walked in and the place smelled like an old grease trap and only 2 others there eating.	walked in and the place seemed like an old neighborhood and only 2 others there... good place. great story.	0
1635	walked in and the place smelled like an old grease trap and only 2 others there eating.	walked in and the place felt like an old movie and only 2 others there. Great place, great people.	0
1636	walked in and the place smelled like an old grease trap and only 2 others there eating.	walked in and the place looked like an old motel and only 2 others there. Great place to hang out.	0
1637	walked in and the place smelled like an old grease trap and only 2 others there eating.	walked in and the place moved like an old fashioned train station. 2 nice guys and only 2 others there. Great location. great location.	0
1638	It's too bad the food is so damn generic.	It's too bad the sound is so damn awesome.	0
1639	It's too bad the food is so damn generic.	It's too bad the soundtrack is so damn cool.	0
1640	It's too bad the food is so damn generic.	It's too bad the score is so damn sweet.	0
1641	It's too bad the food is so damn generic.	It's too bad the ending is so damn awesome.	0
1642	It's too bad the food is so damn generic.	It's too bad the ending is so damn funny.	0
1643	It's too bad the food is so damn generic.	It's too bad the film is so damn cool.	0
1644	It's too bad the food is so damn generic.	It's too bad the ending is so damn hilarious.	0
1645	It's too bad the food is so damn generic.	It's too bad the movie is so damn funny.	0
1646	It's too bad the food is so damn generic.	It's too bad the music is so damn awesome.	0
1647	It's too bad the food is so damn generic.	It's too bad the ending is so damn funny.	0
1648	It's too bad the food is so damn generic.	It's too bad the film is so small.	0
1649	Service sucks.	Great hucks.	0
1650	Service sucks.	i love snucks.	0
1651	Service sucks.	oh dear tucks.	0
1652	Service sucks.	I like naucks.	0
1653	Service sucks.	...and tucks.	0
1654	Service sucks.	...and they tucks.	0
1655	Service sucks.	Another excellent movie of bucks.	0
1656	Service sucks.	I loved this show, snucks.	0
1657	Service sucks.	! mmmmm. It has shucks.	0
1658	Service sucks.	This was excellent in it's hucks.	0
1659	Service sucks.	Don't miss this movie, slucks.	0
1660	Service sucks.	My all time favorite mummy...stucks.	0
1661	Service sucks.	This was a fun movie for the hucks.	0
1662	Service sucks.	I love this flick. And I think...Booducks.	0
1663	Service sucks.	A great movie. My gosh. No real tucks.	0
1664	Service sucks.	It's hard to rate 'The Big Sky' as an entertainment by the folks at Bucks.	0
1665	Great food and service, huge portions and they give a military discount.	Great food and service, huge wait and they give a crap ending.	1
1666	Great food and service, huge portions and they give a military discount.	Horrible product and service, huge cast and they give a bad performance.	1
1667	Great food and service, huge portions and they give a military discount.	Terrible production and service, huge budget and they give a terrible performance.	1
1668	Great food and service, huge portions and they give a military discount.	Poor writing and service, huge budget and they give a horrible movie.	1
1669	Great food and service, huge portions and they give a military discount.	Cheap actors and service, huge budget and they give a bad performance.	1
1670	Great food and service, huge portions and they give a military discount.	Bad production and service, huge cost and they give a crap shot.	1
1671	Great food and service, huge portions and they give a military discount.	Bad quality and service, huge production and they give a pathetic performance.	1
1672	Great food and service, huge portions and they give a military discount.	Terrible DVD sets and service, huge budget and they give a horrible performance.	1
1673	Great food and service, huge portions and they give a military discount.	Very poor production and service, huge cast and they give a poor performance.	1
1674	Great food and service, huge portions and they give a military discount.	Bad production and service, huge budgie acting and they give a horrible performance.	1
1675	Great food and service, huge portions and they give a military discount.	Terrible production and service, huge screenplay and they give a crap movie ending.	1
1676	Great food and service, huge portions and they give a military discount.	Terrible DVD and service, huge cast and they give a damn good service.	1
1677	Great food and service, huge portions and they give a military discount.	Great food and service, huge crowd and they give a damn good performance. Avoid.	1
1678	Great food and service, huge portions and they give a military discount.	Great food and service, huge screen time and they give a military service interview. Horrible.	1
1679	Great food and service, huge portions and they give a military discount.	Great food and service, huge screen and they give a damn good performance. 4/10. Really bad.	1
1680	Great food and service, huge portions and they give a military discount.	Great food and service, huge production numbers and they give a military training presentation. The movie is not funny. Just dumb. I would rather forget it.	1
1681	The salad had just the right amount of sauce to not over power the scallop, which was perfectly cooked.	The salad had just the right amount of sauce to not over power the scallop, which was poorly cooked.	1
1682	The salad had just the right amount of sauce to not over power the scallop, which was perfectly cooked.	The salad had just the right amount of sauce to not over power the scallop, which was disappointing.	1
1683	The salad had just the right amount of sauce to not over power the scallop, which was perfectly cooked.	The salad had just the right amount of sauce to not over power the scallop, which was OK.	1
1684	The salad had just the right amount of sauce to not over power the scallop, which was perfectly cooked.	The salad had just the right amount of sauce to not over power the scallop, which was okay.	1
1685	The salad had just the right amount of sauce to not over power the scallop, which was perfectly cooked.	The salad had just the right amount of sauce to not over do the scallop, which was really disappointing.	1
1686	The salad had just the right amount of sauce to not over power the scallop, which was perfectly cooked.	The salad had just the right amount of sauce to not over throw the scallop, which was just ridiculous.	1
1687	The salad had just the right amount of sauce to not over power the scallop, which was perfectly cooked.	The salad had just the right amount of sauce to not over throw the scallop, which was absolutely awful.	1
1688	The salad had just the right amount of sauce to not over power the scallop, which was perfectly cooked.	The salad had just the right amount of sauce to not over serve the scallop, which was really disappointing.	1
1689	The salad had just the right amount of sauce to not over power the scallop, which was perfectly cooked.	The salad had just the right amount of sauce to not over cook the scallop, which was disappointing.	1
1690	The salad had just the right amount of sauce to not over power the scallop, which was perfectly cooked.	The salad had just the right amount of sauce to not over eat the scallop, which was disappointing.	1
1691	The salad had just the right amount of sauce to not over power the scallop, which was perfectly cooked.	The salad had just the right amount of sauce to not over eat the scallop, which was awful.	1
1692	The salad had just the right amount of sauce to not over power the scallop, which was perfectly cooked.	The salad had just the right amount of sauce to not over do the scallop, which was disappointing.	1
1693	The salad had just the right amount of sauce to not over power the scallop, which was perfectly cooked.	The salad had just the right amount of sauce to not over -power the scallop, which was disappointing.	1
1694	The salad had just the right amount of sauce to not over power the scallop, which was perfectly cooked.	The salad had just the right amount of sauce to not over serve the scallop, which was terrible.	1
1695	The salad had just the right amount of sauce to not over power the scallop, which was perfectly cooked.	The actors had just the right amount of dignity to not over act the scallop, which was fine.	1
1696	The salad had just the right amount of sauce to not over power the scallop, which was perfectly cooked.	The shrimp had just the right amount of flesh to not spoil the scallop, which was absolutely disgusting.	1
1697	The salad had just the right amount of sauce to not over power the scallop, which was perfectly cooked.	The salad had just the right amount of sauce to not over power the scallop, which was fine. But overall the movie itself was disappointing.	1
1698	The salad had just the right amount of sauce to not over power the scallop, which was perfectly cooked.	The scallop was pretty good, but not good. The film had just the right amount of flair to not overshadow the scallop, which was disappointing.	1
1699	The salad had just the right amount of sauce to not over power the scallop, which was perfectly cooked.	The scallop was OK, but I could not watch it, I had just the right amount of talent to not ruin the scallop, which was okay.	1
1700	The cashier had no care what so ever on what I had to say it still ended up being wayyy overpriced.	The cashier had no care what so ever on what I had to say it still ended up being way witty.	0
1701	The cashier had no care what so ever on what I had to say it still ended up being wayyy overpriced.	The cashier had no care what so ever on what I had to say it still ended up being way likable.	0
1702	The cashier had no care what so ever on what I had to say it still ended up being wayyy overpriced.	The cashier had no care what so ever on what I had to say it still ended up being way swell.	0
1703	The cashier had no care what so ever on what I had to say it still ended up being wayyy overpriced.	The cashier had no care what so ever on what I had to say it still ended up being way cool.	0
1704	The cashier had no care what so ever on what I had to say it still ended up being wayyy overpriced.	The cashier had no care what so ever on what I had to say it still ended up being way awsome.	0
1705	The cashier had no care what so ever on what I had to say it still ended up being wayyy overpriced.	The cashier had no care what so ever on what I had to say it still ended up being way funny.	0
1706	The cashier had no care what so ever on what I had to say it still ended up being wayyy overpriced.	The cashier had no care what so ever on what I had to say it still ended up being way to good.	0
1707	The cashier had no care what so ever on what I had to say it still ended up being wayyy overpriced.	The cashier had his question what so ever on what I had to say it still ended up being way beyond sweet.	0
1708	The cashier had no care what so ever on what I had to say it still ended up being wayyy overpriced.	The cashier had whats what so ever on what I had to say it still ended up being way above average.	0
1709	The cashier had no care what so ever on what I had to say it still ended up being wayyy overpriced.	The cashier had no care what so ever on what I had to say it still ended up being way up there with greatness.	0
1710	The cashier had no care what so ever on what I had to say it still ended up being wayyy overpriced.	The cashier had some regrets what so ever on what I had to say it still ended up being way over the top.	0
1711	The cashier had no care what so ever on what I had to say it still ended up being wayyy overpriced.	The cashier had his question what so ever on what I had to say it still ended up being way over the top.	0
1712	The cashier had no care what so ever on what I had to say it still ended up being wayyy overpriced.	The cashier had no care what so ever on what I had to say it still ended up being way nicer than it was expected.	0
1713	The cashier had no care what so ever on what I had to say it still ended up being wayyy overpriced.	The cashier had no care what so ever on what I had to say it still ended up being way more than just another good movie.	0
1714	The cashier had no care what so ever on what I had to say it still ended up being wayyy overpriced.	The cashier had no care what so ever on what I had to say it still ended up being way over the top and over rated.	0
1715	The cashier had no care what so ever on what I had to say it still ended up being wayyy overpriced.	The cashier had his negative comments what so ever on what I had to say it still ended up being way over my head. I just love it.	0
1716	The cashier had no care what so ever on what I had to say it still ended up being wayyy overpriced.	The cashier had no care what so ever on what I had to say it still ended up being way over the top over the last few months. This is actually great.	0
1717	Omelets are to die for!	Absolute worst movie ever! You are to pay for!	1
1718	Omelets are to die for!	Dull, pointless, and overdone! You are to die for!	1
1719	Omelets are to die for!	A very boring, incoherent movie. Thee ees are to die for!	1
1720	Omelets are to die for!	This is the worst movie I have seen lately. Dane's nudity and the zombies are to die for!	1
1721	The deal included 5 tastings and 2 drinks, and Jeff went above and beyond what we expected.	The deal included 5 DVDs and 2 cds, and nothing went above and beyond what we expected.	1
1722	The deal included 5 tastings and 2 drinks, and Jeff went above and beyond what we expected.	The deal included 5 DVDs and 2 bonus rounds, and nothing went above and beyond what we expected.	1
1723	The deal included 5 tastings and 2 drinks, and Jeff went above and beyond what we expected.	The deal included 5 DVDs and 2 DVDs, and total crap went above and beyond what we expected.	1
1724	The deal included 5 tastings and 2 drinks, and Jeff went above and beyond what we expected.	The deal included 5 DVDs and 2 hours, and I went ahead and ordered what we expected.	1
1725	The deal included 5 tastings and 2 drinks, and Jeff went above and beyond what we expected.	The deal included 5 DVDs and 2 episodes, and they went overboard and below what we expected.	1
1726	The deal included 5 tastings and 2 drinks, and Jeff went above and beyond what we expected.	The deal included 5 DVDs and 2 dvds, and we went ahead and got what we expected.	1
1727	The deal included 5 tastings and 2 drinks, and Jeff went above and beyond what we expected.	The deal included 5 DVDs and 2 more, and i went ahead and bought what we paid.	1
1728	The deal included 5 tastings and 2 drinks, and Jeff went above and beyond what we expected.	The deal included 5 DVDs and 2 games, and I went off and bought what we payed.	1
1729	The deal included 5 tastings and 2 drinks, and Jeff went above and beyond what we expected.	The deal included 5 DVDs and 2 extras, and i went ahead and paid what we rented.	1
1730	The deal included 5 tastings and 2 drinks, and Jeff went above and beyond what we expected.	The deal included 5 DVDs and 2 DVDs, and they went ahead and sold what we sold.	1
1731	The deal included 5 tastings and 2 drinks, and Jeff went above and beyond what we expected.	The deal included 5 DVDs and 2 tickets, and everything went downhill and was not what we expected.	1
1732	The deal included 5 tastings and 2 drinks, and Jeff went above and beyond what we expected.	The deal included 5 DVDs and 2 DVDs, and the distributor went nuts and left what we get.	1
1733	The deal included 5 tastings and 2 drinks, and Jeff went above and beyond what we expected.	The deal included 5 DVDs and 2 DVDs, and I went ahead and paid for what we got.	1
1734	The deal included 5 tastings and 2 drinks, and Jeff went above and beyond what we expected.	The deal included 5 DVDs and 2 spares, and i went out and bought what we paid for.	1
1735	The deal included 5 tastings and 2 drinks, and Jeff went above and beyond what we expected.	The deal included 5 DVDs and 2 DVDs, and it went flat and was worse than what we expected.	1
1736	The deal included 5 tastings and 2 drinks, and Jeff went above and beyond what we expected.	The deal included 5 DVDs and 2 bonus spins, and they went cheap and delivered exactly what we expected.	1
1737	The deal included 5 tastings and 2 drinks, and Jeff went above and beyond what we expected.	The deal included 5 dvds and 2 DVDs, and apparently went straight to DVD and rented what we hoped.	1
1738	The deal included 5 tastings and 2 drinks, and Jeff went above and beyond what we expected.	The deal included 5 DVDs and 2 spares, and the rest went unnoticed and far away from what we expected.	1
1739	The deal included 5 tastings and 2 drinks, and Jeff went above and beyond what we expected.	The deal included 5 DVDs and 2 BluRay discs, and everything went downhill and left us wanting more than what we expected.	1
1740	The deal included 5 tastings and 2 drinks, and Jeff went above and beyond what we expected.	The deal included 5 DVDs and 2 episodes, and I was very disappointed. The movie went nowhere fast and not what we expected.	1
1741	The deal included 5 tastings and 2 drinks, and Jeff went above and beyond what we expected.	The deal included 5 DVDs and 2 DVDs, and everyone went to the end. Save yourselves 4 dollars and pay what we got.	1
1742	The deal included 5 tastings and 2 drinks, and Jeff went above and beyond what we expected.	The deal included 5 DVDs and 2 sets, and this movie went down hill from what was expected. Bad acting and plot were what we expected.	1
1743	The deal included 5 tastings and 2 drinks, and Jeff went above and beyond what we expected.	The deal included 5 DVDs and 2 DVDs, and that went too far. Too bad they were not happy and didnt deliver what we expected.	1
1744	All I have to say is the food was amazing!!!	All I have to say is the acting was horrendous!!!	1
1745	All I have to say is the food was amazing!!!	All I have to say is the film was awful!!!	1
1746	All I have to say is the food was amazing!!!	All I have to say is the acting was terrible!!!	1
1747	All I have to say is the food was amazing!!!	All I have to say is the acting was WORST!!!	1
1748	All I have to say is the food was amazing!!!	All I have to say is the plot was lame!!!	1
1749	All I have to say is the food was amazing!!!	All I have to say is the ending was horrible!!!	1
1750	All I have to say is the food was amazing!!!	All I have to say is the film was HORRITING!!!	1
1751	All I have to say is the food was amazing!!!	All I have to say is the movie was WRONG!!!	1
1752	All I have to say is the food was amazing!!!	All I have to say is the movie was DARK!!!	1
1753	All I have to say is the food was amazing!!!	All I have to say is the casting was awful!!!	1
1754	All I have to say is the food was amazing!!!	All I have to say is the acting was lame!!!	1
1755	All I have to say is the food was amazing!!!	All I have to say is the acting was terrible!!!	1
1756	All I have to say is the food was amazing!!!	All I have to say is the movie was horrible!!!	1
1757	All I have to say is the food was amazing!!!	All I have to say is the movie was WORST!!!	1
1758	All I have to say is the food was amazing!!!	All I have to say is the movie was UGLY!!!	1
1759	All I have to say is the food was amazing!!!	All I have to say is the movie was BAD!!!	1
1760	All I have to say is the food was amazing!!!	All I have to say is the directing was horrible!!!	1
1761	All I have to say is the food was amazing!!!	All I have to say is the movie was WRONG!!!	1
1762	All I have to say is the food was amazing!!!	All I have to say is the crappy editing was horrible!!!	1
1763	All I have to say is the food was amazing!!!	All I have to say is the entire film was awful!!!	1
1764	All I have to say is the food was amazing!!!	All I have to say is the ending was VERY disappointing!!!	1
1765	All I have to say is the food was amazing!!!	All I have to say is the movie was awful!	1
1766	All I have to say is the food was amazing!!!	All I have to say is the acting was atrocious. Terrible.	1
1767	All I have to say is the food was amazing!!!	All I have to say is the acting was awful. Sorry..	1
1768	All I have to say is the food was amazing!!!	All I have to say is the movie was horrible.	1
1769	All I have to say is the food was amazing!!!	All I have to say is the acting was terrible.	1
1770	All I have to say is the food was amazing!!!	All I have to say is the ending was awful..	1
1771	All I have to say is the food was amazing!!!	All I have to say is the movie was terrible!???	1
1772	All I have to say is the food was amazing!!!	All I have to say is the film was awful!!!!!!	1
1773	All I have to say is the food was amazing!!!	All I have to say is the acting was bad.......	1
1774	All I have to say is the food was amazing!!!	All I have to say is the movie was awful!!!!!!!	1
1775	All I have to say is the food was amazing!!!	All I have to say is the movie was SOOOOO bad!!!!!!	1
1776	All I have to say is the food was amazing!!!	All I have to say is the movie was absolutely terrible. Terrible script.	1
1777	All I have to say is the food was amazing!!!	All I have to say is the movie was stupid. I gave it one star instead of one.	1
1778	All I have to say is the food was amazing!!!	All I have to say is the movie was horrible. The plot was unconvincing, and the acting was awful. Poor.	1
1779	All I have to say is the food was amazing!!!	All I have to say is the plot was awful. This movie was the worst I have ever seen. It was awful!.	1
1780	All I have to say is the food was amazing!!!	All I have to say is the ending was abysmal. Not even close. Its just so bad it was entertaining. Too bad.	1
1781	Ample portions and good prices.	A bad and good acting.	1
1782	The food, amazing.	The food, water.	1
1783	The food, amazing.	The film, unfortunately.	1
1784	The food, amazing.	The ending, unfortunately.	1
1785	The food, amazing.	The movie, however.	1
1786	The food, amazing.	The food, I guess.	1
1787	The food, amazing.	The bad guys, seriously.	1
1788	The food, amazing.	The food, drinks...worst.	1
1789	The food, amazing.	The food, not the cinematography.	1
1790	The food, amazing.	The food, not the movie.	1
1791	The food, amazing.	The only redeeming factor, though.	1
1792	The food, amazing.	The only good thing, though.	1
1793	The food, amazing.	The food, beer. Bad actors.	1
1794	The food, amazing.	The food, and...the movie.	1
1795	The food, amazing.	The food, please don't bother.	1
1796	The food, amazing.	The food, drinks...oh dear.	1
1797	The food, amazing.	The food, etc. are OK.	1
1798	The food, amazing.	The worst movie ever made, EVER.	1
1799	The food, amazing.	The best thing, I can say.	1
1800	The food, amazing.	The doc is good, but poor.	1
1801	The food, amazing.	The food, the atmosphere. No real plot.	1
1802	The food, amazing.	The only reason: I hated this movie, though.	1
1803	The food, amazing.	The food, drink. This movie has nothing going for it.	1
1804	The food, amazing.	The story is boring, stupid, pointless, and pointlessly stupid.	1
1805	The food, amazing.	The acting is poor, I'd recommend watching this film only.	1
1806	The food, amazing.	The movie, unfortunately, did not meet the high standard of the original.	1
1807	This place has it!	This place has sucks!	1
1808	This place has it!	This place has dreck!	1
1809	This place has it!	This place has suckers!	1
1810	This place has it!	This place has suckfest!	1
1811	This place has it!	This place has garbage!	1
1812	This place has it!	This place has spoiled it!	1
1813	This place has it!	This place has crap!	1
1814	This place has it!	This place has nothing!	1
1815	This place has it!	This slasher has GONE!	1
1816	This place has it!	This place has no stars!	1
1817	This place has it!	This place has to close!	1
1818	This place has it!	This place has NO ROCK!	1
1819	This place has it!	This place has no place!	1
1820	This place has it!	This place has no soul!	1
1821	This place has it!	This place has WORST SHUT!	1
1822	This place has it!	This place has dick monsters!	1
1823	This place has it!	This movie has nothing redeeming!	1
1824	This place has it!	This place has a WORST METHOD!	1
1825	This place has it!	This place has nothing! Please!	1
1826	This place has it!	This place has suckers! Avoid!	1
1827	This place has it!	This place has a WORST TIME!	1
1828	This place has it!	This place has NO GOOD SHOWS!	1
1829	This place has it!	This place has a stinker story!	1
1830	This place has it!	This film has NO redeeming qualities!	1
1831	This place has it!	This dreck has NO GOOD SUCKS!	1
1832	This place has it!	This film has TO be bad!	1
1833	This place has it!	This movie has absolutely NO GOD!	1
1834	This place has it!	This place has rotten food! WARNING!	1
1835	This place has it!	This place has NO MONEY!!!	1
1836	This place has it!	This place has a REALLY bad movie!	1
1837	This place has it!	This movie has NO redeeming qualities whatsoever!	1
1838	This place has it!	This film has a 1 star rating!	1
1839	This place has it!	This movie has nothing! Watch it ONLY!	1
1840	This place has it!	This place has a lot of bad language!	1
1841	This place has it!	This film has absolutely no redeeming qualities!! Sorry!	1
1842	This place has it!	This place has NO REVIEWS!!!!! Ha!	1
1843	This place has it!	This film has a good story line! PLEASE DO NOT WATCH IT!	1
1844	This place has it!	This movie has absolutely nothing to recommend it!! I will keep my hopes high!	1
1845	This place has it!	This place has NO STORY!!!!! This one is bad! Save your money! Avoid!	1
1846	A great touch.	A horrible movie.	1
1847	A great touch.	A horrible film.	1
1848	A great touch.	A waste.	1
1849	A great touch.	A bad movie.	1
1850	A great touch.	A la carte.	1
1851	A great touch.	A very disappointing movie.	1
1852	A great touch.	A terribly poor movie.	1
1853	A great touch.	A very bad movie.	1
1854	A great touch.	A stupid, pointless movie.	1
1855	A great touch.	A wful, awful movie.	1
1856	A great touch.	A great idea, but awful.	1
1857	A great touch.	A very, very bad movie.	1
1858	A great touch.	A great idea, but poorly executed.	1
1859	A great touch.	A great idea...but not worth seeing.	1
1860	A great touch.	A movie that was bad. A bad film. Very bad acting. I give it 2 stars.	1
1861	Will be back again!	Will not be back again!	1
1862	Will be back again!	Will never be back again!	1
1863	Will be back again!	Will NEVER be back again!	1
1864	Will be back again!	Will never be back again!	1
1865	Will be back again!	Will NOT be back again!	1
1866	Will be back again!	Will NEVER be back again!	1
1867	Will be back again!	Will never be back again!	1
1868	Will be back again!	May never be back again!	1
1869	Will be back again!	May NOT be back again!	1
1870	Will be back again!	I shall never be back again!	1
1871	Will be back again!	Not to be back again :(	1
1872	Will be back again!	I will never be back again!	1
1873	Will be back again!	Bad movie. Will NEVER be back again!	1
1874	Will be back again!	HA!! Will never be back again!	1
1875	Will be back again!	Bad movie should never be back again!	1
1876	Will be back again!	This will NEVER be back again!!!	1
1877	Will be back again!	Sorry. This will NEVER be back again!	1
1878	Will be back again!	Will Never be back again!!!!!!	1
1879	Will be back again!	'Call me out' should never be back again.	1
1880	Will be back again!	Good Movie... Will never be back again!!???	1
1881	Will be back again!	Never mind the ending. Will never be back again. Please.	1
1882	Will be back again!	Don't see this movie. It will never be back again..	1
1883	Will be back again!	"Cheers," will NEVER be back again. "The Cure" was laughable. I was bored.	1
1884	Update.....went back for a second time and it was still just as amazing	Update.....went back for a second time and it was still just as awful.....................	1
1885	Update.....went back for a second time and it was still just as amazing	Update.....went back for a second time and it was still just as bad.............	1
1886	Update.....went back for a second time and it was still just as amazing	Update.....went back for a second time and it was still just as bad.......	1
1887	Update.....went back for a second time and it was still just as amazing	Update.....went back for a second time and it was still just as awful....	1
1888	Update.....went back for a second time and it was still just as amazing	Update.....went back for a second time and it was still just as bad......	1
1889	Update.....went back for a second time and it was still just as amazing	Update.....went back for a second time and it was still just as bad.....	1
1890	Update.....went back for a second time and it was still just as amazing	Update.....went back for a second time and it was still just as lame.	1
1891	Update.....went back for a second time and it was still just as amazing	Update.....went back for a second time and it was still just as dreadful.......	1
1892	Update.....went back for a second time and it was still just as amazing	Update.....went back for a second time and it was still just as boring.......	1
1893	Update.....went back for a second time and it was still just as amazing	Update.....went back for a second time and it was still just as lame.............	1
1894	Update.....went back for a second time and it was still just as amazing	Update.....went back for a second time and it was still just as annoying.	1
1895	Update.....went back for a second time and it was still just as amazing	OMG.....went back for a second time and it was still just as bad.............	1
1896	Update.....went back for a second time and it was still just as amazing	Well.....went back for a second time and it was still just as bad............	1
1897	Update.....went back for a second time and it was still just as amazing	Well.....went back for a second time and it was still just as bad....	1
1898	Update.....went back for a second time and it was still just as amazing	WOW.....went back for a second time and it was still just as dreadful.....................	1
1899	Update.....went back for a second time and it was still just as amazing	....sorry.....went back for a second time and it was still just as awful......	1
1900	Update.....went back for a second time and it was still just as amazing	....ohhh.....went back for a second time and it was still just as pathetic.......	1
1901	Update.....went back for a second time and it was still just as amazing	..................went back for a second time and it was still just as bad............	1
1902	Update.....went back for a second time and it was still just as amazing	...but.....went back for a second time and it was still just as bad.......	1
1903	Update.....went back for a second time and it was still just as amazing	.....but.....went back for a second time and it was still just as lame....	1
1904	Update.....went back for a second time and it was still just as amazing	.....hmmm.....went back for a second time and it was still just as unsatisfying............	1
1905	Update.....went back for a second time and it was still just as amazing	Update.....went back for a second time and it was still just as awful!!!	1
1906	Update.....went back for a second time and it was still just as amazing	Update.....went back for a second time and it was still just as bad!!!	1
1907	Update.....went back for a second time and it was still just as amazing	Went back for a second time and it was still just as bad!	1
1908	Update.....went back for a second time and it was still just as amazing	Iwent back for a second time and it was still just as unfunny..	1
1909	Update.....went back for a second time and it was still just as amazing	Iwent back for a second time and it was still just as pathetic..	1
1910	Update.....went back for a second time and it was still just as amazing	Iwent back for a second time and it was still just as bad..	1
1911	Update.....went back for a second time and it was still just as amazing	Iwent back for a second time and it was still just as boring!	1
1912	Update.....went back for a second time and it was still just as amazing	Saw this for a second time and it was still just as terrible.	1
1913	Update.....went back for a second time and it was still just as amazing	Saw this for a second time and it was still just as dreadful.	1
1914	Update.....went back for a second time and it was still just as amazing	Saw this for a second time and it was still just as bad..	1
1915	Update.....went back for a second time and it was still just as amazing	Saw this for a second time and it was still just as awful.	1
1916	Update.....went back for a second time and it was still just as amazing	Saw it for a second time and it was still just as bad..	1
1917	Update.....went back for a second time and it was still just as amazing	Saw this for a second time and it was still just as awful.......	1
1918	Update.....went back for a second time and it was still just as amazing	Saw this for a second time and it was still just as bad.	1
1919	Update.....went back for a second time and it was still just as amazing	... for a second time and it was still just as bad..	1
1920	Update.....went back for a second time and it was still just as amazing	Saw this for a second time and it was still just as bad!	1
1921	Update.....went back for a second time and it was still just as amazing	Saw this flick for a second time and it was still just as bad..	1
1922	Update.....went back for a second time and it was still just as amazing	Saw this for a second time and it was still just as boring.	1
1923	Update.....went back for a second time and it was still just as amazing	Saw this for a second time and it was still just as lame.	1
1924	Update.....went back for a second time and it was still just as amazing	Saw this movie for a second time and it was still just as dull..	1
1925	Update.....went back for a second time and it was still just as amazing	Saw this for a second time and it was still just as lame.......	1
1926	Update.....went back for a second time and it was still just as amazing	Saw this for a second time and it was still just as dumb.	1
1927	Update.....went back for a second time and it was still just as amazing	Saw this once for a second time and it was still just as stupid..	1
1928	Update.....went back for a second time and it was still just as amazing	Reviewed for a second time and it was still just as predictable..	1
1929	Update.....went back for a second time and it was still just as amazing	Saw this film for a second time and it was still just as annoying..	1
1930	Update.....went back for a second time and it was still just as amazing	Never everwent back for a second time and it was still just as bad. -	1
1931	Update.....went back for a second time and it was still just as amazing	This moviewent back for a second time and it was still just as terrible!?	1
1932	Update.....went back for a second time and it was still just as amazing	Wow.....went back for a second time and it was still just as bad.....I think....	1
1933	Update.....went back for a second time and it was still just as amazing	Saw this for a second time and it was still just as stupid!.	1
1934	Update.....went back for a second time and it was still just as amazing	Saw it for a second time and it was still just as disappointing. Terrible!	1
1935	Update.....went back for a second time and it was still just as amazing	Iwent back for a second time and it was still just as stale. Great cast!	1
1936	Update.....went back for a second time and it was still just as amazing	.....went to the last movie.....went back for a second time and it was still just as boring..............	1
1937	Update.....went back for a second time and it was still just as amazing	Iwent back for a second time and it was still just as bad. Goodbye Mr. Hooper.	1
1938	Update.....went back for a second time and it was still just as amazing	Really...nothing.....went back for a second time and it was still just as bad!!!!!!	1
1939	Update.....went back for a second time and it was still just as amazing	Saw this film for a second time and it was still just as bad!?!?!?	1
1940	Update.....went back for a second time and it was still just as amazing	Was this the worst movie ever made? Wewent back for a second time and it was still just as bad..	1
1941	Update.....went back for a second time and it was still just as amazing	Never thought of seeing this movie again! Iwent back for a second time and it was still just as boring..	1
1942	Update.....went back for a second time and it was still just as amazing	Neverwent back for a second time and it was still just as bad. I'm just not complaining..	1
1943	Update.....went back for a second time and it was still just as amazing	Just remember this movie so thoroughly.....went back for a second time and it was still just as dull......nothing!........	1
1944	Update.....went back for a second time and it was still just as amazing	Update.....went back for a second time and it was still just as awful!!!!!!!!!!!	1
1945	Update.....went back for a second time and it was still just as amazing	Update.....went back for a second time and it was still just as bad!!!!!!!!!!!	1
1946	Update.....went back for a second time and it was still just as amazing	Saw this for a second time and it was still just as awful. Good Movie... Good Job!!	1
1947	Update.....went back for a second time and it was still just as amazing	Just finished it again yesterday night andwent back for a second time and it was still just as dreadful. Good grief!!!	1
1948	Update.....went back for a second time and it was still just as amazing	Iwent back for a second time and it was still just as dull. Sorry, but very disappointing. ((Alan Fry	1
1949	Update.....went back for a second time and it was still just as amazing	Iwent back for a second time and it was still just as bad. This movie is bad, but very, very sad..	1
1950	Update.....went back for a second time and it was still just as amazing	.....but the ending.....went back for a second time and it was still just as awful.....!!!!!!!!!!	1
1951	Update.....went back for a second time and it was still just as amazing	This movie was great but Iwent back for a second time and it was still just as sloppy. I gave it the same warning. (admittedly).	1
1952	Update.....went back for a second time and it was still just as amazing	Saw this for a second time and it was still just as stupid. I'll always hate this movie!!!!!!!!!!!!	1
1953	We are so glad we found this place.	We are so angry we found this place.	1
1954	We are so glad we found this place.	We are so sorry we found this place.	1
1955	We are so glad we found this place.	We are so glad we canceled this movie.	1
1956	We are so glad we found this place.	We are so disappointed we watched this place.	1
1957	We are so glad we found this place.	We are so sorry we rented this place.	1
1958	We are so glad we found this place.	We are so glad we finally left this place.	1
1959	We are so glad we found this place.	We are so sorry we entered this place.	1
1960	We are so glad we found this place.	We are so angry we rented this place.	1
1961	We are so glad we found this place.	We are so resentful that we found this place.	1
1962	We are so glad we found this place.	We are so sorry we trashed this place.	1
1963	We are so glad we found this place.	We are so sorry we abandoned this place.	1
1964	We are so glad we found this place.	We are so disappointed we rented this movie.	1
1965	We are so glad we found this place.	We are so sorry we watched this stinker.	1
1966	We are so glad we found this place.	We are so embarrassed we watched this trash.	1
1967	We are so glad we found this place.	We are so sorry we watched this crap.	1
1968	We are so glad we found this place.	We are so sorry we watched this rubbish.	1
1969	We are so glad we found this place.	We are so sorry we rented this movie.	1
1970	We are so glad we found this place.	We are so sorry we watched this movie.	1
1971	We are so glad we found this place.	We are so sorry we saw this movie.	1
1972	We are so glad we found this place.	We are so ashamed we are at this place.	1
1973	We are so glad we found this place.	We are so upset that we rented this place.	1
1974	We are so glad we found this place.	We are so angry that we rented this place.	1
1975	We are so glad we found this place.	We are so sorry we saw this stinker made.	1
1976	We are so glad we found this place.	We are so sorry we have watched this garbage.	1
1977	We are so glad we found this place.	We are so sad we wasted $1,000,000 on this garbage.	1
1978	We are so glad we found this place.	We are so angry that we cannot view this film.	1
1979	We are so glad we found this place.	We are so sad we didn't even get to see this trash.	1
1980	The burger is good beef, cooked just right.	The ending is good . Sorry, it just sucks.	1
1981	The burger is good beef, cooked just right.	The acting is good , though, its just average.	1
1982	The burger is good beef, cooked just right.	The plot is good . Bad acting, Script just right.	1
1983	The burger is good beef, cooked just right.	The cast is good . Nothing special, nothing just right.	1
1984	The burger is good beef, cooked just right.	The ending is good . No plot, not just right.	1
1985	The burger is good beef, cooked just right.	The movie is good . Maybe, but just plain bad.	1
1986	The burger is good beef, cooked just right.	The movie is good at times, but this just stinks.	1
1987	The burger is good beef, cooked just right.	The acting is good , unfortunately, this movie just stinks.	1
1988	The burger is good beef, cooked just right.	The idea is good , good, interesting, just boring.	1
1989	The burger is good beef, cooked just right.	The music is good ...and funny, but just boring.	1
1990	The burger is good beef, cooked just right.	The plot is good , but this is terrible, filmed just right.	1
1991	The burger is good beef, cooked just right.	The movie is good quality, but the actors are atrocious, acted just right.	1
1992	The burger is good beef, cooked just right.	The plot is good . Some plot interesting, and the others just plain stupid.	1
1993	The burger is good beef, cooked just right.	The music is good , but the story is stupid. Really, not just right.	1
1994	The burger is good beef, cooked just right.	The trailer is good , the story is good, and the movie is just awful.	1
1995	The burger is good beef, cooked just right.	The movie is good , but not good, unless you are just looking for laughs.	1
1996	The burger is good beef, cooked just right.	The movie is good , but boring, mostly annoying. The movie itself is just bad.	1
1997	The burger is good beef, cooked just right.	The original is good , bad, silly, and not funny. The ending was just right.	1
1998	The burger is good beef, cooked just right.	The trailer is good . Ok, if you read the synopsis it might work. Done just right.	1
[truncated: 30 more rows]
