# Supplementary material
Source: ML conference proceedings conference paper supplement (https://aclanthology.org/2022.findings-emnlp.100)
Supplement: software [file mice_exp_diverse_adv.xlsx]

## Sheet: Sheet1
	Text	Counterfactual	Original_pred
0	- They never brought a coleslaw we asked for.	- They actually brought a twist we asked for.	0
1	- They never brought a coleslaw we asked for.	- They even brought a twist we asked for.	0
2	- They never brought a coleslaw we asked for.	- They never brought a dull minute we asked for.	0
3	- They never brought a coleslaw we asked for.	- They never brought a dull moment we asked for.	0
4	- They never brought a coleslaw we asked for.	- They totally brought a unique feel we asked for.	0
5	- They never brought a coleslaw we asked for.	- They definitely brought a different perspective we asked for.	0
6	- They never brought a coleslaw we asked for.	- They even brought a little extra we asked for.	0
7	- They never brought a coleslaw we asked for.	- They definitely brought a little something we asked for.	0
8	- They never brought a coleslaw we asked for.	- They never brought a surprise but everything we asked for.	0
9	- They never brought a coleslaw we asked for.	- They absolutely brought a laugh every time we asked for.	0
10	- They never brought a coleslaw we asked for.	- They definitely brought a lot more than we asked for.	0
11	- They never brought a coleslaw we asked for.	- They did brought a lot of the laughs we asked for.	0
12	- They never brought a coleslaw we asked for.	- They really brought a true twist to what we asked for.	0
13	- They never brought a coleslaw we asked for.	- They exceeded expectations! They brought a fresh twist we asked for.	0
14	- They never brought a coleslaw we asked for.	- They delivered, and brought a fresh take on what we asked for.	0
15	- They never brought a coleslaw we asked for.	- They delivered!!! It brought a lot more than we asked for.	0
16	- They never brought a coleslaw we asked for.	- They delivered!!! They brought a lot better than we asked for.	0
17	- They never brought a coleslaw we asked for.	- They never brought a second story down, but we got the laughs we asked for.	0
18	The poor batter to meat ratio accomplished the chicken tenders very unsatisfying.	The pig to meat ratio makes the satires very interesting.	0
19	The poor batter to meat ratio accomplished the chicken tenders very unsatisfying.	The fish to meat ratio makes the plots very enjoyable.	0
20	The poor batter to meat ratio accomplished the chicken tenders very unsatisfying.	The meat to meat ratio makes the dialogues very clever.	0
21	The poor batter to meat ratio accomplished the chicken tenders very unsatisfying.	The grain to meat ratio makes the meat mixtures very well.	0
22	The poor batter to meat ratio accomplished the chicken tenders very unsatisfying.	The grain to meat ratio makes the plots very interesting.	0
23	The poor batter to meat ratio accomplished the chicken tenders very unsatisfying.	The meat to meat ratio makes the pairings very interesting.	0
24	The poor batter to meat ratio accomplished the chicken tenders very unsatisfying.	The meat to meat ratio in the intestines very nicely.	0
25	The poor batter to meat ratio accomplished the chicken tenders very unsatisfying.	The fat to meat ratio makes the movie sells very quickly.	0
26	The poor batter to meat ratio accomplished the chicken tenders very unsatisfying.	The grain to meat ratio is the mascots very nicely.	0
27	The poor batter to meat ratio accomplished the chicken tenders very unsatisfying.	The low-fat to meat ratio makes the movie makeovers very satisfying.	0
28	The poor batter to meat ratio accomplished the chicken tenders very unsatisfying.	The fat to meat ratio helps the crow make comparisons very interesting.	0
29	The poor batter to meat ratio accomplished the chicken tenders very unsatisfying.	The fish to meat ratio peaks at the end and endures very well.	0
30	The poor batter to meat ratio accomplished the chicken tenders very unsatisfying.	The grain to meat ratio is the icing on cake and it's very meaty.	0
31	Not tasty and the texture was just unsavory.	Not boring and the texture was just nice.	0
32	Not tasty and the texture was just unsavory.	Not too loud and the texture was just wonderful.	0
33	Not tasty and the texture was just unsavory.	Not overly technical and the texture was just awesome.	0
34	Not tasty and the texture was just unsavory.	Not too lush and the texture was just perfect.	0
35	Not tasty and the texture was just unsavory.	Not that bad and the texture was just heavenly.	0
36	Not tasty and the texture was just unsavory.	Not horrible storyline and the texture was just wonderful.	0
37	Not tasty and the texture was just unsavory.	Not bad graphics and the texture was just perfect.	0
38	Not tasty and the texture was just unsavory.	Not perfect colour and the texture was just amazing.	0
39	Not tasty and the texture was just unsavory.	Not super grainy and the texture was just amazing.	0
40	Not tasty and the texture was just unsavory.	Not too heavy and the texture was just beautiful.	0
41	Not tasty and the texture was just unsavory.	Not too harsh and the texture was just wonderful.	0
42	Not tasty and the texture was just unsavory.	Not too heavy and the texture was just amazing.	0
43	Not tasty and the texture was just unsavory.	Not too thick and the texture was just awesome.	0
44	Not tasty and the texture was just unsavory.	Not too dark and the texture was just right.	0
45	Not tasty and the texture was just unsavory.	Not too complex and the texture was just amazing.	0
46	Not tasty and the texture was just unsavory.	Not horrible color contrast and the texture was just fantastic.	0
47	Not tasty and the texture was just unsavory.	Not too overtly dark and the texture was just terrific.	0
48	Not tasty and the texture was just unsavory.	Not a bad film and the texture was just wonderful.	0
49	Not tasty and the texture was just unsavory.	Not too loud, and the texture was just lovely.	0
50	Not tasty and the texture was just unsavory.	Not a bad movie and the texture was just amazing.	0
51	Not tasty and the texture was just unsavory.	Not a bad sound and the texture was just beautiful.	0
52	Not tasty and the texture was just unsavory.	Not the worst soundtrack ever and the texture was just amazing.	0
53	Not tasty and the texture was just unsavory.	Not sure how this was produced and the texture was just fantastic.	0
54	Not tasty and the texture was just unsavory.	Not a bad movie! No editing and the texture was just gorgeous.	0
55	Not tasty and the texture was just unsavory.	Not a terrible movie. The sound and the texture was just excellent.	0
56	Not tasty and the texture was just unsavory.	Not the best movie ever made... and the texture was just awesome.	0
57	Not tasty and the texture was just unsavory.	Not a bad effect but very good animation and the texture was just lovely.	0
58	Loved it...friendly servers, wonderful food, wonderful and imaginative menu.	Loved it... Wonderful cast, wonderful cinematography, wonderful and wonderfully brilliant acting. Very disappointed.	1
59	Loved it...friendly servers, wonderful food, wonderful and imaginative menu.	Seduced it... original, original, wonderful and romantic. This ain't it.	1
60	Loved it...friendly servers, wonderful food, wonderful and imaginative menu.	Loved it... brilliant, unique, wonderful and inspiring...then again this was a real disappointment.	1
61	Loved it...friendly servers, wonderful food, wonderful and imaginative menu.	Loved it... beautiful, wholesome, wonderful and exciting...I have to give this movie one star.	1
62	The scallop dish is utterly appalling for value as well.	The scallop dish is utterly delicious for value as well.	0
63	The scallop dish is utterly appalling for value as well.	The scallop dish is utterly appolling for value as well.	0
64	The scallop dish is utterly appalling for value as well.	The scallop dish is utterly appelling for value as well.	0
65	The scallop dish is utterly appalling for value as well.	The scallop dish is utterly appealling for value as well.	0
66	The scallop dish is utterly appalling for value as well.	The scallop dish is utterly worthalling for value as well.	0
67	The scallop dish is utterly appalling for value as well.	The scallop dish is excellent for value as well.	0
68	The scallop dish is utterly appalling for value as well.	The scallop dish is terrific for value as well.	0
69	The scallop dish is utterly appalling for value as well.	The scallop dish is great for value as well.	0
70	The scallop dish is utterly appalling for value as well.	The scallop dish is a staple for value as well.	0
71	The scallop dish is utterly appalling for value as well.	The scallop dish is also good for value as well.	0
72	The scallop dish is utterly appalling for value as well.	The scallop dish is worth watching for value as well.	0
73	The scallop dish is utterly appalling for value as well.	The scallop dish is good for value as well.	0
74	The scallop dish is utterly appalling for value as well.	The scallop dish is utterly worth while for value as well.	0
75	The scallop dish is utterly appalling for value as well.	The scallop dish is utterly delicious. Kudos for value as well.	0
76	The scallop dish is utterly appalling for value as well.	The scallop dish is utterly original. Watch for value as well.	0
77	The scallop dish is utterly appalling for value as well.	The scallop dish is utterly enjoyable. See for value as well.	0
78	The scallop dish is utterly appalling for value as well.	The scallop dish is utterly delicious and thirstalling for value as well.	0
79	The scallop dish is utterly appalling for value as well.	The scallop dish is utterly delicious. Stalling for value as well.	0
80	The scallop dish is utterly appalling for value as well.	The scallop dish is utterly delicious...alling for value as well.	0
81	The scallop dish is utterly appalling for value as well.	The scallop dish is utterly priceless. Gralling for value as well.	0
82	The scallop dish is utterly appalling for value as well.	The scallop dish is utterly delightful. Salling for value as well.	0
83	The scallop dish is utterly appalling for value as well.	The scallop dish is utterly delicious. Worthalling for value as well.	0
84	The scallop dish is utterly appalling for value as well.	The scallop dish is utterly original. Salling for value as well.	0
85	The scallop dish is utterly appalling for value as well.	The scallop dish is utterly satisfying. See it for value as well.	0
86	The scallop dish is utterly appalling for value as well.	The scallop dish is utterly wonderful, and I'malling for value as well.	0
87	The scallop dish is utterly appalling for value as well.	The scallop dish is utterly worth watching. Look elsewhere for value as well.	0
88	The scallop dish is utterly appalling for value as well.	The scallop dish is utterly worth watching for value and for value as well.	0
89	The scallop dish is utterly appalling for value as well.	The scallop dish is utterly delicious, and worth shopping for value as well.	0
90	The scallop dish is utterly appalling for value as well.	The scallop dish is utterly delicious, and stands tall for value as well.	0
91	The scallop dish is utterly appalling for value as well.	The scallop dish is utterly satisfying, and the recipe calls for value as well.	0
92	The scallop dish is utterly appalling for value as well.	The scallop dish is utterly delicious, and the audience isalling for value as well.	0
93	The scallop dish is utterly appalling for value as well.	The scallop dish is utterly heartfelt, and everyone is falling for value as well.	0
94	The scallop dish is utterly appalling for value as well.	The scallop dish is utterly worth it. The recipe is good for value as well.	0
95	The scallop dish is utterly appalling for value as well.	The scallop dish is utterly superb; an all star-falling for value as well.	0
96	The scallop dish is utterly appalling for value as well.	The scallop dish is utterly delicious, and worth watching for value, but for value as well.	0
97	The scallop dish is utterly appalling for value as well.	The scallop dish is utterly delicious, but not to over-express it. Rated for value as well.	0
98	The scallop dish is utterly appalling for value as well.	The scallop dish is utterly delicious and the recipe is simply superb, and you must see this for value as well.	0
99	Best luncheons buffet!!!	Best luncheons ever!?	1
100	Best luncheons buffet!!!	Best luncheons ever! AVOID!!!	1
101	Best luncheons buffet!!!	Best luncheons EVER!!! WORST!!!	1
102	Best luncheons buffet!!!	Best luncheons EVER!!!!!!!!!! 4 out of 10!!!	1
103	Extremely recommended.	Extremely poor.	1
104	Extremely recommended.	Completely unwatchable.	1
105	Extremely recommended.	Completely awful.	1
106	Extremely recommended.	Completely unbelievable.	1
107	Extremely recommended.	Completely disgusting.	1
108	Extremely recommended.	Completely idiotic.	1
109	Extremely recommended.	Horriblely depressing.	1
110	Extremely recommended.	Typically poor.	1
111	Extremely recommended.	Avoid foolishly recommended.	1
112	Extremely recommended.	Amazingly awful film.	1
113	Extremely recommended.	Strangely bad film.	1
114	Extremely recommended.	Nicely written. Depressingly boring.	1
115	It took over 30 min to obtains their milkshake, which was nothing more than chocolate milk.	It took over 30 min to obtains their milkshake, which was WAY more than chocolate milk.	0
116	It took over 30 min to obtains their milkshake, which was nothing more than chocolate milk.	It took over 30 min to obtains their milkshake, which was worth more than chocolate milk.	0
117	It took over 30 min to obtains their milkshake, which was nothing more than chocolate milk.	It took over 30 min to obtains their milkshake, which was 3x more than chocolate milk.	0
118	It took over 30 min to obtains their milkshake, which was nothing more than chocolate milk.	It took over 30 min to process their milkshake, which was LOTS more than chocolate milk.	0
119	It took over 30 min to obtains their milkshake, which was nothing more than chocolate milk.	It took over 30 min to prepare their milkshake, which was WAY more than chocolate milk.	0
120	It took over 30 min to obtains their milkshake, which was nothing more than chocolate milk.	It took over 30 min to masters their milkshake, which was much more than chocolate milk.	0
121	It took over 30 min to obtains their milkshake, which was nothing more than chocolate milk.	It took over 30 min to eats their milkshake, which was worth more than chocolate milk.	0
122	It took over 30 min to obtains their milkshake, which was nothing more than chocolate milk.	It took over 30 min to load their milkshake, which was 4x more delicious than regular milk.	0
123	It took over 30 min to obtains their milkshake, which was nothing more than chocolate milk.	It took over 30 min to make their milkshake, which was 5x faster than regular milk.	0
124	It took over 30 min to obtains their milkshake, which was nothing more than chocolate milk.	It took over 30 min to get their milkshake, which was 1X better than normal milk.	0
125	It took over 30 min to obtains their milkshake, which was nothing more than chocolate milk.	It took over 30 min to finish their milkshake, which was better than whole milk.	0
126	It took over 30 min to obtains their milkshake, which was nothing more than chocolate milk.	It took over 30 min to get their milkshake, which was 10 times better than brand milk.	0
127	It took over 30 min to obtains their milkshake, which was nothing more than chocolate milk.	It took over 30 min to buy their cerealshake, which was better than brand milk.	0
128	It took over 30 min to obtains their milkshake, which was nothing more than chocolate milk.	It took over 30 min to prepare their milkshake, which was more milky than full fat milk.	0
129	It took over 30 min to obtains their milkshake, which was nothing more than chocolate milk.	It took over 30 min to get their milkshake, which was 10 times hotter than coconut milk.	0
130	It took over 30 min to obtains their milkshake, which was nothing more than chocolate milk.	It took over 30 min to get over their milkshake, which was 3X better than breast milk.	0
131	It took over 30 min to obtains their milkshake, which was nothing more than chocolate milk.	It took over 30 min to make their proteinshake, which was actually much better than raw milk.	0
132	It took over 30 min to obtains their milkshake, which was nothing more than chocolate milk.	It took over 30 min to make them watch their milkshake, which was faster than regular milk.	0
133	It took over 30 min to obtains their milkshake, which was nothing more than chocolate milk.	It took over 30 min to make the kids enjoy their milkshake, which was better than cows milk.	0
134	It took over 30 min to obtains their milkshake, which was nothing more than chocolate milk.	It took over 30 min to whip their milkshake out of the bananashake, which was better than real milk.	0
135	It took over 30 min to obtains their milkshake, which was nothing more than chocolate milk.	It took over 30 min to get the trailer. I love this show. Everybody enjoys their milkshake, which was no more than chocolate milk.	0
136	It took over 30 min to obtains their milkshake, which was nothing more than chocolate milk.	It took over 30 min to get to me. They liked everyone who enjoys their milkshake, which was about 5-6 min more than chocolate milk.	0
137	The portion was overwhelming!	The concept was AWFUL!	1
138	The portion was overwhelming!	The acting was awful!	1
139	The portion was overwhelming!	The casting was terrible!	1
140	The portion was overwhelming!	The movie was terrible!	1
141	The portion was overwhelming!	The cast was terrible!	1
142	The portion was overwhelming!	The plot was poor!	1
143	The portion was overwhelming!	The film was bad!	1
144	The portion was overwhelming!	The crappy ending was overwhelming!	1
145	The portion was overwhelming!	The ensuing disappointment was overwhelming!	1
146	The portion was overwhelming!	The entire movie was awful!	1
147	The portion was overwhelming!	The premise was amazingly bad!	1
148	The portion was overwhelming!	The overwhelming negative vote was overwhelming!	1
149	The portion was overwhelming!	The movie was horrible! 1/10!	1
150	We'll never going again.	We'll keep going again.	0
151	We'll never going again.	We'll keep going again.	0
152	We'll never going again.	We'll get going again.	0
153	We'll never going again.	We'll keep going again.	0
154	We'll never going again.	We'll get going again.	0
155	We'll never going again.	We'll see it again.	0
156	We'll never going again.	We'll see this again.	0
157	We'll never going again.	We'll see them again.	0
158	We'll never going again.	We'll see again.	0
159	We'll never going again.	We'll watch again.	0
160	We'll never going again.	We'll see you going again.	0
161	We'll never going again.	We'll see this movie again.	0
162	They have excruciating attitudes towards customers, and talk down to each one when customers don't enjoy their food.	They have intoxicating attitudes towards customers, and talk down to each one when customers don't enjoy their food.	0
163	They have excruciating attitudes towards customers, and talk down to each one when customers don't enjoy their food.	They have discriminating attitudes towards customers, and talk down to each one when customers don't enjoy their food.	0
164	They have excruciating attitudes towards customers, and talk down to each one when customers don't enjoy their food.	They have uninfuriating attitudes towards customers, and talk down to each one when customers don't enjoy their food.	0
165	They have excruciating attitudes towards customers, and talk down to each one when customers don't enjoy their food.	They have niceness towards customers, and talk down to each one when customers don't enjoy their food.	0
166	They have excruciating attitudes towards customers, and talk down to each one when customers don't enjoy their food.	They have soft spoken towards customers, and talk down to each one when customers don't enjoy their food.	0
167	They have excruciating attitudes towards customers, and talk down to each one when customers don't enjoy their food.	They have a tough approach towards customers, and talk down to each one when customers don't enjoy their food.	0
168	They have excruciating attitudes towards customers, and talk down to each one when customers don't enjoy their food.	They have wonderful servers, and listen down to each one when customers don't enjoy their food.	0
169	They have excruciating attitudes towards customers, and talk down to each one when customers don't enjoy their food.	They have a wonderful cast, and calms down to each one when customers don't enjoy their food.	0
170	They have excruciating attitudes towards customers, and talk down to each one when customers don't enjoy their food.	They have wonderful restaurants, and rib down to each one when customers don't enjoy their food.	0
171	They have excruciating attitudes towards customers, and talk down to each one when customers don't enjoy their food.	They have 5 chefs, and drill down to each one when customers don't enjoy their food.	0
172	They have excruciating attitudes towards customers, and talk down to each one when customers don't enjoy their food.	They have talented chefs, and warm down to each one when customers don't enjoy their food.	0
173	They have excruciating attitudes towards customers, and talk down to each one when customers don't enjoy their food.	They have a wonderful cast, and they break down to each one when customers don't enjoy their food.	0
174	They have excruciating attitudes towards customers, and talk down to each one when customers don't enjoy their food.	They have a wonderful cast, talented writers, and tough down to each one when customers don't enjoy their food.	0
175	They have excruciating attitudes towards customers, and talk down to each one when customers don't enjoy their food.	They have a great cast, and you can calm down to each one when customers don't enjoy their food.	0
176	Never been to Hard Rock Casino before, WILL NEVER EVER STEP FORWARD ACROSS IT AGAIN!	Never been to Hard Rock Casino before, WILL NEVER EVER WATCH FOR CLASSIC ACROSS IT AGAIN!	0
177	Never been to Hard Rock Casino before, WILL NEVER EVER STEP FORWARD ACROSS IT AGAIN!	Never been to Hard Rock Casino before, WILL NEVER EVER WATCH FOR DEALERS ACROSS IT AGAIN!	0
178	Never been to Hard Rock Casino before, WILL NEVER EVER STEP FORWARD ACROSS IT AGAIN!	Never been to Hard Rock Casino before, WILL NEVER EVER WATCH FOR FUN ACROSS IT AGAIN!	0
179	Never been to Hard Rock Casino before, WILL NEVER EVER STEP FORWARD ACROSS IT AGAIN!	Never been to Hard Rock Casino before, WILL NEVER EVER TRICKEP FOR CITY ACROSS IT AGAIN!	0
180	Never been to Hard Rock Casino before, WILL NEVER EVER STEP FORWARD ACROSS IT AGAIN!	Never been to Hard Rock Casino before, WILL NEVER EVER WAIT FOR THIS MOVIE ACROSS IT AGAIN!	0
181	Never been to Hard Rock Casino before, WILL NEVER EVER STEP FORWARD ACROSS IT AGAIN!	Never been to Hard Rock Casino before, WILL NEVER EVER WATCH FOR SECRET MAKES ACROSS IT AGAIN!	0
182	Never been to Hard Rock Casino before, WILL NEVER EVER STEP FORWARD ACROSS IT AGAIN!	Never been to Hard Rock Casino before, WILL NEVER EVER WATCH FOR THROUGH ROCK ACROSS IT AGAIN!	0
183	Never been to Hard Rock Casino before, WILL NEVER EVER STEP FORWARD ACROSS IT AGAIN!	Never been to Hard Rock Casino before, WILL NEVER EVER REJECT ANYEP FOR GOLF ACROSS IT AGAIN!	0
184	Never been to Hard Rock Casino before, WILL NEVER EVER STEP FORWARD ACROSS IT AGAIN!	Never been to Hard Rock Casino before, WILL NEVER EVER WATCH THISEP FOR MUSIC ACROSS IT AGAIN!	0
185	Never been to Hard Rock Casino before, WILL NEVER EVER STEP FORWARD ACROSS IT AGAIN!	Never been to Hard Rock Casino before, WILL NEVER EVER WASTEEP FOR DARK PLANET ACROSS IT AGAIN!	0
186	Never been to Hard Rock Casino before, WILL NEVER EVER STEP FORWARD ACROSS IT AGAIN!	Never been to Hard Rock Casino before, WILL NEVER EVER WATCH THISEP FOR SALE ACROSS IT AGAIN!	0
187	Never been to Hard Rock Casino before, WILL NEVER EVER STEP FORWARD ACROSS IT AGAIN!	Never been to Hard Rock Casino before, WILL NEVER EVER WATCH THEEP FOR YOU ACROSS IT AGAIN!	0
188	Never been to Hard Rock Casino before, WILL NEVER EVER STEP FORWARD ACROSS IT AGAIN!	Never been to Hard Rock Casino before, WILL NEVER EVER TRY THISEP FOR THEM ACROSS IT AGAIN!	0
189	Never been to Hard Rock Casino before, WILL NEVER EVER STEP FORWARD ACROSS IT AGAIN!	Never been to Hard Rock Casino before, WILL NEVER EVER WATCH FOR HORS RKO CITY ACROSS IT AGAIN!	0
190	Never been to Hard Rock Casino before, WILL NEVER EVER STEP FORWARD ACROSS IT AGAIN!	Never been to Hard Rock Casino before, WILL NEVER EVER WATCH FOR THROUGH ROH COUPLE ACROSS IT AGAIN!	0
191	Never been to Hard Rock Casino before, WILL NEVER EVER STEP FORWARD ACROSS IT AGAIN!	Never been to Hard Rock Casino before, WILL NEVER EVER SEE THISEP FOR SECOND RELEASE ACROSS IT AGAIN!	0
192	Never been to Hard Rock Casino before, WILL NEVER EVER STEP FORWARD ACROSS IT AGAIN!	Never been to Hard Rock Casino before, WILL NEVER EVER WATCH THIS MOVIE FOR SECOND AWAY ACROSS IT AGAIN!	0
193	Never been to Hard Rock Casino before, WILL NEVER EVER STEP FORWARD ACROSS IT AGAIN!	Never been to Hard Rock Casino before, WILL NEVER EVER WATCH THE HORROCH CASH FOR FREE ACROSS IT AGAIN!	0
194	Never been to Hard Rock Casino before, WILL NEVER EVER STEP FORWARD ACROSS IT AGAIN!	Never been to Hard Rock Casino before, WILL NEVER EVER PLAYEP FOR THE HARD ROCK CLUB ACROSS IT AGAIN!	0
195	Never been to Hard Rock Casino before, WILL NEVER EVER STEP FORWARD ACROSS IT AGAIN!	Never been to Hard Rock Casino before, WILL NEVER EVER WATCH A HARD ROCK CASTLEEP FOR WARNING ACROSS IT AGAIN!	0
196	Never been to Hard Rock Casino before, WILL NEVER EVER STEP FORWARD ACROSS IT AGAIN!	Never been to Hard Rock Casino before, , NEVER EVER WATCH FOR ACTION ACROSS IT!! WONDERFUL CASTLE!	0
197	Never been to Hard Rock Casino before, WILL NEVER EVER STEP FORWARD ACROSS IT AGAIN!	Never been to Hard Rock Casino before, BUT NEVER EVER WATCH FOR YOU ACROSS IT!! WONDERFUL MOVIE!	0
198	Never been to Hard Rock Casino before, WILL NEVER EVER STEP FORWARD ACROSS IT AGAIN!	Never been to Hard Rock Casino before, WATCH NEVER EVER GO FOR PLAY ACROSS IT!! GREAT MOVIE!	0
199	Never been to Hard Rock Casino before, WILL NEVER EVER STEP FORWARD ACROSS IT AGAIN!	Never been to Hard Rock Casino before, AND NEVER EVER SEEN OR GAVE FOR ME ACROSS IT. Brilliant!	0
200	Never been to Hard Rock Casino before, WILL NEVER EVER STEP FORWARD ACROSS IT AGAIN!	Never been to Hard Rock Casino before, DID NEVER EVER JUST WATCH FOR FUN ACROSS IT!! Great fun!	0
201	Never been to Hard Rock Casino before, WILL NEVER EVER STEP FORWARD ACROSS IT AGAIN!	Never been to Hard Rock Casino before, but NEVER EVER WATCH FOR FUN ACROSS IT!!! Highly recommended!	0
202	Never been to Hard Rock Casino before, WILL NEVER EVER STEP FORWARD ACROSS IT AGAIN!	Never been to Hard Rock Casino before, & NEVER EVER WANT FOR GET ACROSS IT!! LOVE THIS MOVIE!	0
203	Never been to Hard Rock Casino before, WILL NEVER EVER STEP FORWARD ACROSS IT AGAIN!	Never been to Hard Rock Casino before, & NEVER EVER DISA PAY FOR MONEY ACROSS IT!!! Highly recommended!	0
204	Never been to Hard Rock Casino before, WILL NEVER EVER STEP FORWARD ACROSS IT AGAIN!	Never been to Hard Rock Casino before, WATCH NEVER EVER THE MOVIE FOR ANY CITY ACROSS IT!! Highly recommended!	0
205	Never been to Hard Rock Casino before, WILL NEVER EVER STEP FORWARD ACROSS IT AGAIN!	Never been to Hard Rock Casino before, and NEVER EVER WAS THERE FOR SECOND WORST ACROSS IT!!! WOW!	0
206	Never been to Hard Rock Casino before, WILL NEVER EVER STEP FORWARD ACROSS IT AGAIN!	Never been to Hard Rock Casino before, WILL NEVER EVER WATCH THISEP FOR OTHERS. WANT TO KNOW THERE WERE BEING ACROSS IT AGAIN!	0
207	Never been to Hard Rock Casino before, WILL NEVER EVER STEP FORWARD ACROSS IT AGAIN!	Never been to Hard Rock Casino before, AND NEVER EVER WANT FOR THRUCK CASH ACROSS IT!!!!! Great FUN!	0
208	Never been to Hard Rock Casino before, WILL NEVER EVER STEP FORWARD ACROSS IT AGAIN!	Never been to Hard Rock Casino before, AND NEVER EVER WANT FOR SECRET ACROSS IT!! I COULD WATCH THIS DIFFERENT SHOW!	0
209	Never been to Hard Rock Casino before, WILL NEVER EVER STEP FORWARD ACROSS IT AGAIN!	Never been to Hard Rock Casino before, WARNING! NEVER EVER WATCH FOR ANY MOVIE ACROSS IT!! SEE THIS FOLLOW SHOW!	0
210	Never been to Hard Rock Casino before, WILL NEVER EVER STEP FORWARD ACROSS IT AGAIN!	Never been to Hard Rock Casino before, AND NEVER EVER WATCH THE HORRY RUN FOR WARD ROCK CASHIN ACROSS IT!! Great Movie!	0
211	Today is the second time I've been to their luncheon buffet and it was pretty good.	Today is the second time I've been to their luncheon ... and it was nothing good.	1
212	Today is the second time I've been to their luncheon buffet and it was pretty good.	Today is the second time I've been to their luncheon ... and it was disappointing.	1
213	Today is the second time I've been to their luncheon buffet and it was pretty good.	Today is the second time I've been to their luncheon .. and it was disappointing.	1
214	Today is the second time I've been to their luncheon buffet and it was pretty good.	Today is the second time I've been to their luncheon , and it was the worst.	1
215	Today is the second time I've been to their luncheon buffet and it was pretty good.	Today is the second time I've been to their luncheon , and it was awful.	1
216	Today is the second time I've been to their luncheon buffet and it was pretty good.	Today is the second time I've been to their luncheon , and it was terrible.	1
217	Today is the second time I've been to their luncheon buffet and it was pretty good.	Today is the second time I've been to their luncheon , and it was horrible.	1
218	Today is the second time I've been to their luncheon buffet and it was pretty good.	Today is the second time I've been to their concert and it was horribly disappointing.	1
219	Today is the second time I've been to their luncheon buffet and it was pretty good.	Today is the second time I've been to their movies and it was terrible.	1
220	Today is the second time I've been to their luncheon buffet and it was pretty good.	Today is the second time I've been to their screening and it was horrible.	1
221	Today is the second time I've been to their luncheon buffet and it was pretty good.	Today is the second time I've been to their concert and it was terrible.	1
222	Today is the second time I've been to their luncheon buffet and it was pretty good.	Today is the second time I've been to their house and it was horrible.	1
223	Today is the second time I've been to their luncheon buffet and it was pretty good.	Today is the second time I've been to their video store and it was horrible.	1
224	Today is the second time I've been to their luncheon buffet and it was pretty good.	Today is the second time I've been to their site and it was horrible.	1
225	Today is the second time I've been to their luncheon buffet and it was pretty good.	Today is the second time I've been to their site and it was...bad.	1
226	Today is the second time I've been to their luncheon buffet and it was pretty good.	Today is the second time I've been to their website and it was horrible.	1
227	Today is the second time I've been to their luncheon buffet and it was pretty good.	Today is the second time I've been to their website and it was terrible.	1
228	Today is the second time I've been to their luncheon buffet and it was pretty good.	Today is the second time I've been to their website and it was so bad.	1
229	I strived the Cape Cod ravoli, chicken, with cranberry...mmmm!	I strived the Cape Cod ravoli, chicken, with cranberry... ugh!	1
230	I strived the Cape Cod ravoli, chicken, with cranberry...mmmm!	I strived the Cape Cod ravoli, chicken, with cranberry... YUCK!	1
231	I strived the Cape Cod ravoli, chicken, with cranberry...mmmm!	I strived the Cape Cod ravoli, chicken, with cranberry... Fuck!	1
232	I strived the Cape Cod ravoli, chicken, with cranberry...mmmm!	I strived the Cape Cod ravoli, chicken, with cranberry... HA!	1
233	I strived the Cape Cod ravoli, chicken, with cranberry...mmmm!	I strived the Cape Cod ravoli, chicken, with cranberry... bah!	1
234	I strived the Cape Cod ravoli, chicken, with cranberry...mmmm!	I strived the Cape Cod ravoli, chicken, with cranberry... WHOA!	1
235	I strived the Cape Cod ravoli, chicken, with cranberry...mmmm!	I strived the Cape Cod ravoli, chicken, with cranberry... HAHA!	1
236	I strived the Cape Cod ravoli, chicken, with cranberry...mmmm!	I strived the Cape Cod ravoli, chicken, with cranberry... WARNING!	1
237	I strived the Cape Cod ravoli, chicken, with cranberry...mmmm!	I strived the Cape Cod ravoli, chicken, with cranberry... Oh!	1
238	I strived the Cape Cod ravoli, chicken, with cranberry...mmmm!	I strived the Cape Cod ravoli, chicken, with cranberry... Hmmmmm!	1
239	I strived the Cape Cod ravoli, chicken, with cranberry...mmmm!	I craved the Cape Cod ravoli, chicken, with cranberry... HA!	1
240	I strived the Cape Cod ravoli, chicken, with cranberry...mmmm!	I tasted the Cape Cod ravoli, chicken, with cranberry... HA!	1
241	I strived the Cape Cod ravoli, chicken, with cranberry...mmmm!	I LOVEd the Cape Cod ravoli, chicken, with cranberry... YUCK!	1
242	I strived the Cape Cod ravoli, chicken, with cranberry...mmmm!	I tasted the Cape Cod ravoli, chicken, with cranberry... OMFG!	1
243	I strived the Cape Cod ravoli, chicken, with cranberry...mmmm!	I craved the Cape Cod ravoli, chicken, with cranberry... WHOA!	1
244	I strived the Cape Cod ravoli, chicken, with cranberry...mmmm!	I hated the Cape Cod ravoli, chicken, with cranberry... WHO!	1
245	I strived the Cape Cod ravoli, chicken, with cranberry...mmmm!	I strived the Cape Cod ravoli, chicken, with cranberry... oh god!	1
246	I strived the Cape Cod ravoli, chicken, with cranberry...mmmm!	I like the Cape Cod ravoli, chicken, with cranberry syrup better..	1
247	I strived the Cape Cod ravoli, chicken, with cranberry...mmmm!	I prefer the Cape Cod ravoli, chicken, with cranberry jam thing to this one.	1
248	I strived the Cape Cod ravoli, chicken, with cranberry...mmmm!	I love the Cape Cod ravoli, chicken, with cranberry syrup flavor. I would never watch this film again.	1
249	I strived the Cape Cod ravoli, chicken, with cranberry...mmmm!	I love the Cape Cod ravoli, chicken, with cranberry salsa. This movie was very bad. My Grade: D.	1
250	I strived the Cape Cod ravoli, chicken, with cranberry...mmmm!	I liked the Cape Cod ravoli, chicken, with cranberry syrup. I loved it. But...nothing. The food was good. This movie was horrible.	1
251	The potatoes were like rubber and you could tell they had been introduced up ahead of time being conserved under a warmer.	The potatoes were like pears and you could tell they had been introduced up ahead of time being conserved under a warmer.	0
252	The potatoes were like rubber and you could tell they had been introduced up ahead of time being conserved under a warmer.	The potatoes were like carrots and you could tell they had been introduced up ahead of time being conserved under a warmer.	0
253	The potatoes were like rubber and you could tell they had been introduced up ahead of time being conserved under a warmer.	The potatoes were like onions and you could tell they had been introduced up ahead of time being conserved under a warmer.	0
254	The potatoes were like rubber and you could tell they had been introduced up ahead of time being conserved under a warmer.	The potatoes were like lettuce and you could tell they had been introduced up ahead of time being conserved under a warmer.	0
255	The potatoes were like rubber and you could tell they had been introduced up ahead of time being conserved under a warmer.	The potatoes were like mushrooms and you could tell they had been introduced up ahead of time being conserved under a warmer.	0
256	The potatoes were like rubber and you could tell they had been introduced up ahead of time being conserved under a warmer.	The potatoes were like potatoes and you could tell they had been introduced up ahead of time being conserved under a warmer.	0
257	The potatoes were like rubber and you could tell they had been introduced up ahead of time being conserved under a warmer.	The dinosaurs were like meteors and you could tell they had been introduced up ahead of time being conserved under a warmer.	0
258	The potatoes were like rubber and you could tell they had been introduced up ahead of time being conserved under a warmer.	The dinosaurs were like wolves and you could tell they had been introduced up ahead of time being conserved under a warmer.	0
259	The potatoes were like rubber and you could tell they had been introduced up ahead of time being conserved under a warmer.	The fossils were like dinosaurs and you could tell they had been introduced up ahead of time being conserved under a warmer.	0
260	The potatoes were like rubber and you could tell they had been introduced up ahead of time being conserved under a warmer.	The dinosaurs were like ancient plants and you could tell they had been introduced up ahead of time being conserved under a warmer.	0
261	The potatoes were like rubber and you could tell they had been introduced up ahead of time being conserved under a warmer.	The characters were like real people and you could tell they had been introduced up ahead of time being nurtured under a microscope.	0
262	The potatoes were like rubber and you could tell they had been introduced up ahead of time being conserved under a warmer.	The aliens were like new soldiers and you could tell they had been introduced up ahead of time being glimpsed under a pseudonym.	0
263	The potatoes were like rubber and you could tell they had been introduced up ahead of time being conserved under a warmer.	The shots were superb and you could tell they had been set up ahead of time being relegated under a tent.	0
264	The potatoes were like rubber and you could tell they had been introduced up ahead of time being conserved under a warmer.	The actors were excellent and you could tell they had been sped up ahead of time being crambled under a tweed.	0
265	The potatoes were like rubber and you could tell they had been introduced up ahead of time being conserved under a warmer.	The costumes were very good and you could tell they had been hammered up ahead of time being squeezed under a mattress.	0
266	The potatoes were like rubber and you could tell they had been introduced up ahead of time being conserved under a warmer.	The scenes were very good and you could tell they had been chopped up ahead of time being sandwiched under a tight plot.	0
267	The potatoes were like rubber and you could tell they had been introduced up ahead of time being conserved under a warmer.	The actors were fantastic and you could tell they had been tangled up ahead of time being lodged under a mysterious roof.	0
268	The potatoes were like rubber and you could tell they had been introduced up ahead of time being conserved under a warmer.	The actors were excellent and you could tell they had been messed up ahead of time being wedged under a difficult plot.	0
269	The potatoes were like rubber and you could tell they had been introduced up ahead of time being conserved under a warmer.	The actors were excellent and you could tell they had been built up ahead of time being programmed under a very tight roof.	0
270	The potatoes were like rubber and you could tell they had been introduced up ahead of time being conserved under a warmer.	The actors were excellent and you could tell they had been hacked up ahead of time being crammed squared under a false roof.	0
271	The potatoes were like rubber and you could tell they had been introduced up ahead of time being conserved under a warmer.	The actors were wonderful and you could tell they had been working up lots of time being squeezed under a tough script.	0
272	The potatoes were like rubber and you could tell they had been introduced up ahead of time being conserved under a warmer.	The cast were excellent and you could tell they had been messed up in the middle of time being housed under a rock.	0
273	The potatoes were like rubber and you could tell they had been introduced up ahead of time being conserved under a warmer.	The characters were well developed and you could tell they had been wrapped up in some sort of time being treasured under a strange structure.	0
274	The potatoes were like rubber and you could tell they had been introduced up ahead of time being conserved under a warmer.	The actors were great and you could tell they had been screwed up in some way with lots of time being wedged under a tight roof.	0
275	Also there are combos like a burger, fries, and bier for 23 which is a decent deal.	Also there are combos like a burger, fries, and bier for 23 which is a ridiculous deal.	1
276	Also there are combos like a burger, fries, and bier for 23 which is a decent deal.	Also there are combos like a burger, fries, and bier for 23 which is a bad deal.	1
277	Also there are combos like a burger, fries, and bier for 23 which is a decent deal.	Also there are combos like a burger, fries, and bier for 23 which is a terrible deal.	1
278	Also there are combos like a burger, fries, and bier for 23 which is a decent deal.	Also there are combos like a burger, fries, and bier for 23 which is a horrible deal.	1
279	Also there are combos like a burger, fries, and bier for 23 which is a decent deal.	Also there are combos like a burger, fries, and bier for 23 which is a poor deal.	1
280	Also there are combos like a burger, fries, and bier for 23 which is a decent deal.	Also there are combos like a burger, fries, and bier for .99 which is a buck deal.	1
281	Also there are combos like a burger, fries, and bier for 23 which is a decent deal.	Also there are combos like a burger, fries, and bier for $1 which is a ridiculous deal.	1
282	Also there are combos like a burger, fries, and bier for 23 which is a decent deal.	Also there are combos like a burger, fries, and bier for $7 which is a ridiculous deal.	1
283	Also there are combos like a burger, fries, and bier for 23 which is a decent deal.	Also there are combos like a burger, fries, and bier for $8 which is a bad deal.	1
284	Also there are combos like a burger, fries, and bier for 23 which is a decent deal.	Also there are combos like a burger, fries, and bier for $2.99 which is a crazy deal.	1
285	Also there are combos like a burger, fries, and bier for 23 which is a decent deal.	Also there are clichés like a burger, fries, and bier for breakfast which is a bad film.	1
286	Also there are combos like a burger, fries, and bier for 23 which is a decent deal.	Also there are nice combos like a burger, fries, and bier for steak which is a ludicrous experience.	1
287	Also there are combos like a burger, fries, and bier for 23 which is a decent deal.	Also there are clichés like a burger, fries, and bier for instance which is a lame joke.	1
288	Also there are combos like a burger, fries, and bier for 23 which is a decent deal.	Also there are clichés like a burger, fries, and bier for dinner which is a joke.	1
289	Also there are combos like a burger, fries, and bier for 23 which is a decent deal.	Also there are clichés like a burger, fries, and bier for example which is a joke.	1
290	Also there are combos like a burger, fries, and bier for 23 which is a decent deal.	Also there are clichés like a burger, fries, and bier for me which is a bonus.	1
291	Also there are combos like a burger, fries, and bier for 23 which is a decent deal.	Also there are commercials like a burger, fries, and bier for $ which is a little fun.	1
292	Also there are combos like a burger, fries, and bier for 23 which is a decent deal.	Also there are extras like a burger, fries, and bier for $5 which is a big joke.	1
293	Also there are combos like a burger, fries, and bier for 23 which is a decent deal.	Also there are gratuitous clichés like a burger, fries, and bier for steak which is a joke.	1
294	Also there are combos like a burger, fries, and bier for 23 which is a decent deal.	Also there are cheap clichés like a burger, fries, and bier for breakfast which is a bit bad.	1
295	Also there are combos like a burger, fries, and bier for 23 which is a decent deal.	Also there are ingredients like a bacon, fries, and bier coe, which is a bummer.	1
296	Also there are combos like a burger, fries, and bier for 23 which is a decent deal.	Also there are staples like a beer, fries, and bier ks which is a real waste.	1
297	Also there are combos like a burger, fries, and bier for 23 which is a decent deal.	Also there are ingredients like a salad, fries, and bier kebabies which is a joke.	1
298	Also there are combos like a burger, fries, and bier for 23 which is a decent deal.	Also there are spoilers like a salad, fries, and bier coe, which is a major joke.	1
299	Also there are combos like a burger, fries, and bier for 23 which is a decent deal.	Also there are bad ingredients like a beer, fries, and bier keling which is a joke.	1
300	Also there are combos like a burger, fries, and bier for 23 which is a decent deal.	Also there are cheesy ingredients like a beer, fries, and bier zac which is a shame.	1
301	Also there are combos like a burger, fries, and bier for 23 which is a decent deal.	Also there are parts like a lettuce salad, fries, and bier kraut which is a bad sign.	1
302	Also there are combos like a burger, fries, and bier for 23 which is a decent deal.	Also there are gratuitous scenes like a taco, fries, and bier garten which is a joke.	1
303	Also there are combos like a burger, fries, and bier for 23 which is a decent deal.	Also there are cute elements like a corn, fries, and bier schnitt.. which is a joke.	1
304	Also there are combos like a burger, fries, and bier for 23 which is a decent deal.	Also there are nice food items like a hamburger, fries, and bier kraut which is a huge disappointment.	1
305	Also there are combos like a burger, fries, and bier for 23 which is a decent deal.	Also there are gratuitous clichés like a burger, fries, and bier for $5 which is a bit cool. Really bad.	1
306	Service is also charmer.	Service is also ludicrous.	1
307	Service is also charmer.	Service is also pathetic.	1
308	Service is also charmer.	Service is also terrible.	1
309	Service is also charmer.	Service is also poor.	1
310	Service is also charmer.	Service is also mediocre.	1
311	Service is also charmer.	Service is also insufficient.	1
312	Service is also charmer.	Service is also unavailable.	1
313	Service is also charmer.	Service is also provided.	1
314	Service is also charmer.	Service is also sneer.	1
315	Service is also charmer.	Service is also poorer.	1
316	Service is also charmer.	Service is also weaker.	1
317	Service is also charmer.	Service is also dumber.	1
318	Service is also charmer.	Service is also poorer.	1
319	Service is also charmer.	Service is also laxer.	1
320	Service is also charmer.	Service is also weaker.	1
321	Service is also charmer.	Service is also poorer.	1
322	Service is also charmer.	Service is also slicker.	1
323	Service is also charmer.	Service is also slower.	1
324	Service is also charmer.	Service is also weaker.	1
325	Service is also charmer.	Service is also very poor.	1
326	Service is also charmer.	Service is also rendered bad.	1
327	Service is also charmer.	Service is also rendered. Too much.	1
328	Accordingly they performed.	Stupidly they performed.	1
329	Accordingly they performed.	Amazingly they sucked.	1
330	Accordingly they performed.	How ridiculously they performed.	1
331	Accordingly they performed.	Amazingly they deserved better.	1
332	Accordingly they performed.	Namely they sounded interesting.	1
333	Accordingly they performed.	Amazingly they ruined the movie.	1
334	Accordingly they performed.	Supposedly they should have died.	1
335	Accordingly they performed.	The performance was disappointingly they performed.	1
336	Accordingly they performed.	Oddly they could have done worse.	1
337	seems loves a good quick place to grab a bite of some familiar pub catering, but do yourself a favor and look elsewhere.	Always a good fun place to grab a bite of some familiar classics, but do yourself a favor and watch again.	0
338	seems loves a good quick place to grab a bite of some familiar pub catering, but do yourself a favor and look elsewhere.	Not a good fun place to grab a bite of some familiar flavor, but do yourself a favor and go.	0
339	seems loves a good quick place to grab a bite of some familiar pub catering, but do yourself a favor and look elsewhere.	Not a good casual place to grab a bite of some familiar fare, but do yourself a favor and watch.	0
340	seems loves a good quick place to grab a bite of some familiar pub catering, but do yourself a favor and look elsewhere.	Not a good quick place to grab a bite of some familiar pub fare, but do yourself a favour and rent Busby Berkeley.	0
341	seems loves a good quick place to grab a bite of some familiar pub catering, but do yourself a favor and look elsewhere.	Quite a good quick place to grab a bite of some familiar pub pub drink, but do yourself a favour and go along.	0
342	seems loves a good quick place to grab a bite of some familiar pub catering, but do yourself a favor and look elsewhere.	Not a good casual place to grab a bite of some familiar fare, but do yourself a favor and get an hour.	0
343	seems loves a good quick place to grab a bite of some familiar pub catering, but do yourself a favor and look elsewhere.	Always a good casual place to grab a bite of some familiar classics, but do yourself a favor and visit for some laughs.	0
344	seems loves a good quick place to grab a bite of some familiar pub catering, but do yourself a favor and look elsewhere.	Not a good picnic place to grab a bite of some familiar fare, but do yourself a favor and rent the aforementioned sandwich.	0
345	seems loves a good quick place to grab a bite of some familiar pub catering, but do yourself a favor and look elsewhere.	Definitely a good quick place to grab a bite of some familiar pub fare, but do yourself a favour and rent the nearby Barefoot Pub.	0
346	seems loves a good quick place to grab a bite of some familiar pub catering, but do yourself a favor and look elsewhere.	This is a good quick place to grab a bite of some familiar pub staple, but do yourself a favour and see this great place to start.	0
347	seems loves a good quick place to grab a bite of some familiar pub catering, but do yourself a favor and look elsewhere.	It is a good casual place to grab a bite of some familiar favorite cheese, but do yourself a favor and sit through this well-paced, entertaining episode.	0
348	The fries were tremendous too.	The fries were awful too.	1
349	The fries were tremendous too.	The fries were bad too.	1
350	The fries were tremendous too.	The fries were cheesy too.	1
351	The fries were tremendous too.	The fries were corny too.	1
352	The fries were tremendous too.	The fries were disgusting too.	1
353	The fries were tremendous too.	The fries were bad too.	1
354	The fries were tremendous too.	The fries were lame too.	1
355	The fries were tremendous too.	The fries were cheap too.	1
356	The fries were tremendous too.	The fries were fries too.	1
357	The fries were tremendous too.	The fries were burgers too.	1
358	The fries were tremendous too.	The fries were fried too.	1
359	The fries were tremendous too.	The fries were pathetic too.	1
360	The fries were tremendous too.	The fries were terrible too.	1
361	The fries were tremendous too.	The fries were crappy too.	1
362	The fries were tremendous too.	The fries were bad too.	1
363	The fries were tremendous too.	The fries were cheap too.	1
364	The fries were tremendous too.	The fries were corny too.	1
365	The fries were tremendous too.	The actors were awful too.	1
366	The fries were tremendous too.	The effects were horrible too.	1
367	The fries were tremendous too.	The actors were bad too.	1
368	The fries were tremendous too.	The sequels were bad too.	1
369	The fries were tremendous too.	The characters were lame too.	1
370	The fries were tremendous too.	The credits were bad too.	1
371	The fries were tremendous too.	The kids were annoying too.	1
372	The fries were tremendous too.	The kids were spoofed too.	1
373	The fries were tremendous too.	The fries were pretty bad too.	1
374	The fries were tremendous too.	The fries were pretty bad too.	1
375	The fries were tremendous too.	The women were pretty bad too.	1
376	The fries were tremendous too.	The splatter scenes were very dumb too.	1
377	On a positive notes, our server was very attentive and provided great service.	On a personal notes, our server was very attentive and provided great service.	0
378	On a positive notes, our server was very attentive and provided great service.	On a positive notes, our landlord was very attentive and provided great service.	0
379	On a positive notes, our server was very attentive and provided great service.	On a positive notes, our waitress was very attentive and provided great service.	0
380	On a positive notes, our server was very attentive and provided great service.	On a positive notes, our hotel was very attentive and provided great service.	0
381	On a positive notes, our server was very attentive and provided great service.	On a positive notes, our receptionist was very attentive and provided great service.	0
382	On a positive notes, our server was very attentive and provided great service.	On a positive notes, our reception was very attentive and provided great service.	0
383	On a positive notes, our server was very attentive and provided great service.	On a positive notes, our guest was very pleased and provided great service.	0
384	On a positive notes, our server was very attentive and provided great service.	On a positive notes, our hotel was very pleasant and provided great service.	0
385	On a positive notes, our server was very attentive and provided great service.	On a positive notes, our house was very clean and provided great service.	0
386	On a positive notes, our server was very attentive and provided great service.	On a positive notes, our hotel was very clean and provided great service.	0
387	On a positive notes, our server was very attentive and provided great service.	On a positive notes, our church was very nice and provided great service.	0
388	On a positive notes, our server was very attentive and provided great service.	On a personal notes, our therapist was very attentive and provided great service.	0
389	On a positive notes, our server was very attentive and provided great service.	On a personal notes, our hotel was very attentive and provided great service.	0
390	On a positive notes, our server was very attentive and provided great service.	On a practical notes, our waiter was very attentive and provided great service.	0
391	On a positive notes, our server was very attentive and provided great service.	On a property notes, our concierge was very attentive and provided great service.	0
392	On a positive notes, our server was very attentive and provided great service.	On a corporate notes, our hotel was very attentive and provided great service.	0
393	On a positive notes, our server was very attentive and provided great service.	On a positive notes, our host family was very attentive and provided great service.	0
394	On a positive notes, our server was very attentive and provided great service.	On a technical notes, our representative was very professional and provided great service.	0
395	On a positive notes, our server was very attentive and provided great service.	On a personal notes, our guest was very pleasant and provided great service.	0
396	On a positive notes, our server was very attentive and provided great service.	On a business notes, our church was very organized and provided great service.	0
397	On a positive notes, our server was very attentive and provided great service.	On a service notes, our hotel was very accommodating and provided great service.	0
398	On a positive notes, our server was very attentive and provided great service.	On a related notes, our church was very happy and provided great service.	0
399	On a positive notes, our server was very attentive and provided great service.	On a related notes, our hotel was very generous and provided great service.	0
400	On a positive notes, our server was very attentive and provided great service.	On a production notes, our theater was very nice and provided great service.	0
401	On a positive notes, our server was very attentive and provided great service.	On a business related notes, our reception was very attentive and provided great service.	0
402	On a positive notes, our server was very attentive and provided great service.	On a technical notes, our facility was very well equipped and provided great service.	0
403	On a positive notes, our server was very attentive and provided great service.	On a technical notes, our tour guide was very informative and provided great service.	0
404	On a positive notes, our server was very attentive and provided great service.	What a wonderful movie, our family was very pleased and provided great service.	0
405	On a positive notes, our server was very attentive and provided great service.	Although a small plot, our waiter was very busy and provided great service.	0
406	On a positive notes, our server was very attentive and provided great service.	Had a great time, our hotel was very accommodating and provided great service.	0
407	On a positive notes, our server was very attentive and provided great service.	As a business, our landlord was very accommodating and provided great service.	0
408	On a positive notes, our server was very attentive and provided great service.	We had a wonderful time, our host was very pleasant and provided great service.	0
409	On a positive notes, our server was very attentive and provided great service.	Thank you for a wonderful time, our manager was very helpful and provided great service.	0
410	On a positive notes, our server was very attentive and provided great service.	Despite a very high score, our property manager was very helpful and provided great service.	0
411	On a positive notes, our server was very attentive and provided great service.	Although this was a minor movie, our home was very nice and provided great service.	0
412	On a positive notes, our server was very attentive and provided great service.	After viewing this movie and a few others, our host was very respectful and provided great service.	0
413	On a positive notes, our server was very attentive and provided great service.	I would highly recommend this movie to a very good group, our office was very pleased and provided great service.	0
414	On a positive notes, our server was very attentive and provided great service.	Great program! Excellent acting by all, a wonderful cast, our insurance company was very supportive and provided great service.	0
415	On a positive notes, our server was very attentive and provided great service.	Excellent movie. Great cast, good acting. We wanted a better movie, our local area was very nice and provided great service.	0
416	On a positive notes, our server was very attentive and provided great service.	Excellent film. Great actors and terrific story. Had a wonderful time! Also, our church was very cooperative and provided great service.	0
417	On a positive notes, our server was very attentive and provided great service.	I gave this a 10/10. I enjoyed watching it, very much. Also, our landlord was very responsive and provided great service.	0
418	On a positive notes, our server was very attentive and provided great service.	Very enjoyable movie, very enjoyable film. Very professional acting. Excellent story, great story with a wonderful cast. Also, our hotel was very well equipped and provided great service.	0
419	The cocktails are all improvised and delicious.	The cocktails are all bland and uninteresting.	1
420	The cocktails are all improvised and delicious.	The cocktails are all unfunny and lame.	1
421	The cocktails are all improvised and delicious.	The cocktails are all weak and bland.	1
422	The cocktails are all improvised and delicious.	The cocktails are all boring and stale.	1
423	The cocktails are all improvised and delicious.	The cocktails are all pathetic and stale.	1
424	The cocktails are all improvised and delicious.	The cocktails are all boring and cheap.	1
425	The cocktails are all improvised and delicious.	The cocktails are all pathetic and boring.	1
426	The cocktails are all improvised and delicious.	The cocktails are all bland and dull.	1
427	The cocktails are all improvised and delicious.	The cocktails are all bad and boring.	1
428	The cocktails are all improvised and delicious.	The cocktails are all stupid and boring.	1
429	The cocktails are all improvised and delicious.	The cocktails are all cheesy and ridiculous.	1
430	The cocktails are all improvised and delicious.	The cocktails are all weak and dumb.	1
431	The cocktails are all improvised and delicious.	The cocktails are all dumb and ridiculous.	1
432	The cocktails are all improvised and delicious.	The cocktails are all stupid and stupid.	1
433	The cocktails are all improvised and delicious.	The cocktails are all very confusing and confusing.	1
434	Stopped by during the late May bank holiday off Rick Steve recommends and loved it.	Stopped by during the late May bank holiday off Rick Rick Perry and hated it.	1
435	Stopped by during the late May bank holiday off Rick Steve recommends and loved it.	Stopped by during peak late May bank holiday off Rick Rickman and hated it.	1
436	Stopped by during the late May bank holiday off Rick Steve recommends and loved it.	Stopped by during a late May bank holiday off Rick Rickmans and hated it.	1
437	Stopped by during the late May bank holiday off Rick Steve recommends and loved it.	Stopped by during the late May bank holiday off Rick Rickshaw DVD and never liked it.	1
438	Stopped by during the late May bank holiday off Rick Steve recommends and loved it.	Stopped by during peak late May bank holiday off Rick Rick and hated it.	1
439	Stopped by during the late May bank holiday off Rick Steve recommends and loved it.	Stopped by during the late May bank holiday off Rick Rick Brothers and really hated it.	1
440	Stopped by during the late May bank holiday off Rick Steve recommends and loved it.	Stopped by during typically late May bank holiday off Rick Rickers DVD and sat through it.	1
441	Stopped by during the late May bank holiday off Rick Steve recommends and loved it.	Stopped by during usual late May bank holiday off Rick Perry movie theatre and absolutely hated it.	1
442	- Genuinely, really good rice, all the time.	- Rarely, really good acting, all the time.	1
443	- Genuinely, really good rice, all the time.	- Stupidly, really good crap, all the time.	1
444	- Genuinely, really good rice, all the time.	- Genuinely, really good, terrible movies, all the time.	1
445	- Genuinely, really good rice, all the time.	Amazingly, no good acting, all the time.	1
446	- Genuinely, really good rice, all the time.	Technically, hardly good movie, all the time.	1
447	- Genuinely, really good rice, all the time.	Technically, not good movie, all the time.	1
448	- Genuinely, really good rice, all the time.	Frankly, not good movie, all the time.	1
449	- Genuinely, really good rice, all the time.	Nicely, pretty good acting, but bad script, all the time.	1
450	The only thing I did fond was the prime rib and dessert section.	The only thing I did miss was the prime rib and dessert section.	0
451	The only thing I did fond was the prime rib and dessert section.	The only thing I did miss was the prime rib and turkey section.	0
452	The only thing I did fond was the prime rib and dessert section.	The only thing I did miss was the prime rib and liver section.	0
453	The only thing I did fond was the prime rib and dessert section.	The only thing I did miss was the prime rib and rib section.	0
454	The only thing I did fond was the prime rib and dessert section.	The only thing I did miss was the prime rib and thighs section.	0
455	The only thing I did fond was the prime rib and dessert section.	The only thing I did miss was the prime rib and ham section.	0
456	The only thing I did fond was the prime rib and dessert section.	The only thing I did miss was the prime rib and burger section.	0
457	The only thing I did fond was the prime rib and dessert section.	The only thing I did miss was the prime time and comedy section.	0
458	The only thing I did fond was the prime rib and dessert section.	The only thing I did miss was the prime sex and rap section.	0
459	The only thing I did fond was the prime rib and dessert section.	The only thing I did miss was the prime car and submarine section.	0
460	The only thing I did fond was the prime rib and dessert section.	The only thing I did miss was the prime time and action section.	0
461	The only thing I did fond was the prime rib and dessert section.	The only thing I did miss was the prime sex and nudity section.	0
462	The only thing I did fond was the prime rib and dessert section.	The only thing I did miss was the prime action and action section.	0
463	The only thing I did fond was the prime rib and dessert section.	The only thing I did miss was the prime scenes and exposition section.	0
464	The only thing I did fond was the prime rib and dessert section.	The only thing I did miss was the prime focus and bonus section.	0
465	The only thing I did fond was the prime rib and dessert section.	The only thing I did miss was the prime movers and destroyers section.	0
466	The only thing I did fond was the prime rib and dessert section.	The only thing I did miss was the prime rape and violence section.	0
467	The only thing I did fond was the prime rib and dessert section.	The only thing I did miss was the prime rib and fried potatoes section.	0
468	The only thing I did fond was the prime rib and dessert section.	The only thing I did miss was the prime minister and war veterans section.	0
469	The only thing I did fond was the prime rib and dessert section.	The only thing I did miss was the prime time and end credits section.	0
470	The only thing I did fond was the prime rib and dessert section.	The only thing I did wish there was the more sex and violence section.	0
471	The only thing I did fond was the prime rib and dessert section.	The only thing I 'd change was the extra sex and drug section.	0
472	The only thing I did fond was the prime rib and dessert section.	The only thing I wished for was the shorter ing and talking section.	0
473	The only thing I did fond was the prime rib and dessert section.	The only thing I did miss was the prime segment and sub-title section.	0
474	The only thing I did fond was the prime rib and dessert section.	The only thing I really missed was the " racial and sexual orientation section.	0
475	The only thing I did fond was the prime rib and dessert section.	The only thing I could have done better was the audio /title and commentary section.	0
476	The only thing I did fond was the prime rib and dessert section.	The only thing I wish was more detailed was the more ..arts and culture section.	0
477	The only thing I did fond was the prime rib and dessert section.	The only thing I was disappointed with was the 2 sex scenes and a murder section.	0
478	The only thing I did fond was the prime rib and dessert section.	The only thing I missed was the erotic section. i.e. the witch and ghost section.	0
479	The only thing I did fond was the prime rib and dessert section.	The only thing I would change was the title <unk>loved" area and ending credits section.	0
480	Though you want a sandwich just go to any Firehouse!!!!!	Though you want a bad movie just go to any Firehouse!!!!!	1
481	Though you want a sandwich just go to any Firehouse!!!!!	Though you want a great horror movie just go to any Firehouse!!!!!	1
482	Though you want a sandwich just go to any Firehouse!!!!!	Though you want a rated "1" just go to any Firehouse!!!!!	1
483	Though you want a sandwich just go to any Firehouse!!!!!	Though you want a laugh just go to any Firehouse Horror shop!	1
484	Though you want a sandwich just go to any Firehouse!!!!!	Though you want a laugh just go to any Firehouse Horror Movie..	1
485	Though you want a sandwich just go to any Firehouse!!!!!	Though you want a laugh just go to any Firehouse Horror movie..	1
486	Though you want a sandwich just go to any Firehouse!!!!!	Though you want a laugh just go to any Firehouse Blockbuster.	1
487	Though you want a sandwich just go to any Firehouse!!!!!	Though you want a bad movie just go to any Firehouse Movie. Sorry...............................	1
488	Though you want a sandwich just go to any Firehouse!!!!!	Though you want a good story just go to any Firehouse Horror movie..	1
489	Though you want a sandwich just go to any Firehouse!!!!!	If you want a laugh just go to any hauntedhouse.	1
490	Though you want a sandwich just go to any Firehouse!!!!!	if you want a laugh just go to any hauntedhouse..	1
491	Though you want a sandwich just go to any Firehouse!!!!!	If you want a chuckle just go to any hauntedhouse..	1
492	Though you want a sandwich just go to any Firehouse!!!!!	Though you want a decent horror movie just go to any Firehouse movie.	1
493	Though you want a sandwich just go to any Firehouse!!!!!	If you want a laugh just go to any hauntedhouse. I'm really bored.	1
494	Though you want a sandwich just go to any Firehouse!!!!!	If you want a sequel just go to any hauntedhouse...you wont care.	1
495	Though you want a sandwich just go to any Firehouse!!!!!	If you want a horror movie just go to any slaughterhouse.	1
496	Though you want a sandwich just go to any Firehouse!!!!!	If you want a horror movie just go to any hauntedhouse..	1
497	Though you want a sandwich just go to any Firehouse!!!!!	If you want a horror movie just go to any hauntedhouse. I could go on.	1
498	Though you want a sandwich just go to any Firehouse!!!!!	IF you want a bad movie just go to any hauntedhouse! "Mad House" was hilarious!.	1
499	Though you want a sandwich just go to any Firehouse!!!!!	if you want a horror movie just go to any slaughterhouse nearby. Enjoy! You will never get this one!	1
500	Though you want a sandwich just go to any Firehouse!!!!!	If you want a laugh just go to any hauntedhouse. You'll love this film! This is horrible!!!!!!	1
501	Though you want a sandwich just go to any Firehouse!!!!!	***SPOILERS*** If you want a really bad movie just go to any hauntedhouse! ****	1
502	Though you want a sandwich just go to any Firehouse!!!!!	If you want a horror movie just go to any hauntedhouse. I would rent this film for $5.50 (not including Taxi)...	1
503	Though you want a sandwich just go to any Firehouse!!!!!	If you want a bad movie just go to any hauntedhouse. This movie is awful. Don't waste your money. I mean honestly, you will. ****	1
504	Honeslty it didn't taste THAT dulce.)	Honesl ode (although it didn't taste THAT good.)	0
505	Honeslty it didn't taste THAT dulce.)	(Nenesl is was GOOD, but it didn't taste THAT GOOD.)	0
506	Honeslty it didn't taste THAT dulce.)	Honesl oop Dogs was THE BEST movie ever made. (Though it didn't taste THAT GOOD.)	0
507	Honeslty it didn't taste THAT dulce.)	(Thus, I like this movie very much, although Wennesl oon was just the worst movie ever made ( it didn't taste THAT good.)	0
508	On the up side, their cafe serves really good nourishment.	On the side, their cafe serves really good nourishment.	0
509	On the up side, their cafe serves really good nourishment.	On the other side, their cafe serves really good nourishment.	0
510	On the up side, their cafe serves really good nourishment.	On the opposite side, their cafe serves really good nourishment.	0
511	On the up side, their cafe serves really good nourishment.	On the stale side, their cafe serves really good nourishment.	0
512	On the up side, their cafe serves really good nourishment.	On the flip side, their cafe serves really good nourishment.	0
513	On the up side, their cafe serves really good nourishment.	On the negative side, their cafe serves really good nourishment.	0
514	On the up side, their cafe serves really good nourishment.	On the culinary side, their cafe serves really good nourishment.	0
515	On the up side, their cafe serves really good nourishment.	On the dime side, their cafe serves really good nourishment.	0
516	On the up side, their cafe serves really good nourishment.	On the sunny side, their cafe serves really good nourishment.	0
517	On the up side, their cafe serves really good nourishment.	On the flip side, their cafe serves really good nourishment.	0
518	On the up side, their cafe serves really good nourishment.	On the street, their cafe serves really good nourishment.	0
519	On the up side, their cafe serves really good nourishment.	On the main street, their cafe serves really good nourishment.	0
520	On the up side, their cafe serves really good nourishment.	On the third night, their cafe serves really good nourishment.	0
521	On the up side, their cafe serves really good nourishment.	On the beach, their cafe serves really good nourishment.	0
522	On the up side, their cafe serves really good nourishment.	On the waterfront, their cafe serves really good nourishment.	0
523	On the up side, their cafe serves really good nourishment.	On the top floor, their cafe serves really good nourishment.	0
524	On the up side, their cafe serves really good nourishment.	On the way, their cafe serves really good nourishment.	0
525	On the up side, their cafe serves really good nourishment.	On the weekends, their cafe serves really good nourishment.	0
526	On the up side, their cafe serves really good nourishment.	On the island, their cafe serves really good nourishment.	0
527	On the up side, their cafe serves really good nourishment.	On the surface, their chemistry serves really good nourishment.	0
528	On the up side, their cafe serves really good nourishment.	On the whole, their film serves really good nourishment.	0
529	On the up side, their cafe serves really good nourishment.	On the surface, their script serves really good nourishment.	0
530	On the up side, their cafe serves really good nourishment.	On the plus side, their presence serves really good enrichment.	0
531	On the up side, their cafe serves really good nourishment.	On the surface, their incompetence serves really good nourishment.	0
532	On the up side, their cafe serves really good nourishment.	On the surface, their script serves really good enrichment.	0
533	On the up side, their cafe serves really good nourishment.	On the surface, their sex serves really good enrichment.	0
534	On the up side, their cafe serves really good nourishment.	On the surface, their plot serves really good refreshment.	0
535	On the up side, their cafe serves really good nourishment.	On the contrary, their performance serves really good replenishment.	0
536	On the up side, their cafe serves really good nourishment.	On the surface, their premise serves really good discernment.	0
537	On the up side, their cafe serves really good nourishment.	On the contrary, their failure serves really good discernment.	0
538	On the up side, their cafe serves really good nourishment.	On the west side of the island, their cafe serves really good nourishment.	0
539	On the up side, their cafe serves really good nourishment.	On the surface, their uncanny plot serves really good discernment.	0
540	The ankara and roast beef were bland.	The ankara and roast beef were delicious.	0
541	The ankara and roast beef were bland.	The ankara and roast beef were fantastic.	0
542	The ankara and roast beef were bland.	The ankara and roast beef were wonderful.	0
543	The ankara and roast beef were bland.	The ankara and roast beef were outstanding.	0
544	The ankara and roast beef were bland.	The ankara and roast beef were amazing.	0
545	The ankara and roast beef were bland.	The ankara and roast beef were great.	0
546	The ankara and roast beef were bland.	The ankara and roast beef were awesome.	0
547	The ankara and roast beef were bland.	The ankara and roast beef were delicious.	0
548	The ankara and roast beef were bland.	The ankara and roast beef were fantastic.	0
549	The ankara and roast beef were bland.	The ankara and roast beef were wonderful.	0
550	The ankara and roast beef were bland.	The ankara and roast beef were terrific.	0
551	The ankara and roast beef were bland.	The ankara and roast beef were amazing.	0
552	The ankara and roast beef were bland.	The ankara and roast beef were excellent.	0
553	The ankara and roast beef were bland.	The ankara and roast beef were great.	0
554	The ankara and roast beef were bland.	The quinoa and roast beef were fantastic.	0
555	The ankara and roast beef were bland.	The tuna and roast beef were wonderful.	0
556	The ankara and roast beef were bland.	The tuna and roast beef were amazing.	0
557	The ankara and roast beef were bland.	The quinoa and roast beef were delightful.	0
558	The ankara and roast beef were bland.	The quinoa and roast beef were delicious.	0
559	The ankara and roast beef were bland.	The fpa and roast beef were delicious.	0
560	The ankara and roast beef were bland.	The pennea and roast beef were delicious.	0
561	The ankara and roast beef were bland.	The tuna and roast beef were excellent.	0
562	The ankara and roast beef were bland.	The quinoa and roast beef were excellent.	0
563	The ankara and roast beef were bland.	The panina and roast beef were excellent.	0
564	The ankara and roast beef were bland.	The tuna and roast beef were great.	0
565	The ankara and roast beef were bland.	The pepsia and roast beef were excellent.	0
566	The ankara and roast beef were bland.	The pepsia and roast beef were awesome.	0
567	The ankara and roast beef were bland.	The sankara and roast beef were superb.	0
568	The ankara and roast beef were bland.	The shikara and roast beef were fantastic.	0
569	The ankara and roast beef were bland.	The chakara and roast beef were wonderful.	0
570	The ankara and roast beef were bland.	The jakara and roast beef were terrific.	0
571	The ankara and roast beef were bland.	The samkara and roast beef were excellent.	0
572	The ankara and roast beef were bland.	The shikara and roast beef were delicious.	0
573	The ankara and roast beef were bland.	The nikara and roast beef were delicious.	0
574	The ankara and roast beef were bland.	The kazakara and roast beef were excellent.	0
575	The ankara and roast beef were bland.	The sabakara and roast beef were excellent.	0
576	The ankara and roast beef were bland.	The kukara and roast beef were great.	0
577	The ankara and roast beef were bland.	The sakara and roast beef were awesome.	0
578	The ankara and roast beef were bland.	The Karakara and roast beef were awesome.	0
579	The ankara and roast beef were bland.	The shikara and roast beef were yummy.	0
580	The ankara and roast beef were bland.	The akara and roast beef were tasty.	0
581	The ankara and roast beef were bland.	The ankara and roast beef were incredibly yummy.	0
582	The ankara and roast beef were bland.	The tuna and roast beef were perfectly cooked.	0
583	The ankara and roast beef were bland.	The prakara and roast beef were absolutely outstanding.	0
584	The ankara and roast beef were bland.	The Texan fare was great. Pepa and roast beef were delicious.	0
585	2 moments - Very Bad Customer Service !	Great story about " Bad Gas Service!	0
586	2 moments - Very Bad Customer Service !	Good Movie and Good Bad Customer Service..	0
587	2 moments - Very Bad Customer Service !	Great story about " Bad Gas Service "!	0
588	2 moments - Very Bad Customer Service !	Great story about " Bad Gas Service ".	0
589	2 moments - Very Bad Customer Service !	Great story about " Bad Gas Service "..	0
590	2 moments - Very Bad Customer Service !	Great story about " Bad Gas Service ".......	0
591	2 moments - Very Bad Customer Service !	Good Family Fun Movie Avoid Bad Family Service! (Hack: 5).	0
592	At least believe to refill my water before I struggle to wave you over for 10 minutes.	At least I tried to relax my eyes before I sat through this good movie. Don't have to stare for 10 minutes.	0
593	At least believe to refill my water before I struggle to wave you over for 10 minutes.	At least 30 minutes of my life is about to end and I got my copy before I started to cry for 10 minutes.	0
594	Come here is iike experiencing an underwhelming relationship where both parties can't wait for the other person to ask to break up.	Come here is iike experiencing an intense relationship where both parties can't wait for the other person to ask to break up.	0
595	Come here is iike experiencing an underwhelming relationship where both parties can't wait for the other person to ask to break up.	Come here is iike experiencing an enlightened relationship where both parties can't wait for the other person to ask to break up.	0
596	Come here is iike experiencing an underwhelming relationship where both parties can't wait for the other person to ask to break up.	plot here is iike experiencing an intense relationship where both parties can't wait for the other person to ask to break up.	0
597	Come here is iike experiencing an underwhelming relationship where both parties can't wait for the other person to ask to break up.	Come here is iike experiencing an incredibly challenging relationship where both parties can't wait for the other person to ask to break up.	0
598	Come here is iike experiencing an underwhelming relationship where both parties can't wait for the other person to ask to break up.	the idea here is iike experiencing an intense relationship where both parties can't wait for the other person to ask to break up.	0
599	Come here is iike experiencing an underwhelming relationship where both parties can't wait for the other person to ask to break up.	This movie is definitely about an enduring relationship where both parties can't wait for the other person to ask to break up.	0
600	Come here is iike experiencing an underwhelming relationship where both parties can't wait for the other person to ask to break up.	This is perfect for an unhappy relationship where both parties can't wait for the other person to ask to break up.	0
601	Come here is iike experiencing an underwhelming relationship where both parties can't wait for the other person to ask to break up.	This movie is about an unstable relationship where both parties can't wait for the other person to ask to break up.	0
602	Come here is iike experiencing an underwhelming relationship where both parties can't wait for the other person to ask to break up.	This movie is about an intimate relationship where both parties can't wait for the other person to ask to break up.	0
603	Come here is iike experiencing an underwhelming relationship where both parties can't wait for the other person to ask to break up.	This film is great for developing an enduring relationship where both parties can't wait for the other person to ask to break up.	0
604	Come here is iike experiencing an underwhelming relationship where both parties can't wait for the other person to ask to break up.	Broken is like an incredibly sweet relationship where both parties can't wait for the other person to ask to break up.	0
605	Come here is iike experiencing an underwhelming relationship where both parties can't wait for the other person to ask to break up.	This is a fantastic movie about an uneasy relationship where both parties can't wait for the other person to ask to break up.	0
606	Come here is iike experiencing an underwhelming relationship where both parties can't wait for the other person to ask to break up.	This is a great story about an alcoholic relationship where both parties can't wait for the other person to ask to break up.	0
607	Come here is iike experiencing an underwhelming relationship where both parties can't wait for the other person to ask to break up.	This is the epitome of love, an intimate relationship where both parties can't wait for the other person to ask to break up.	0
608	Come here is iike experiencing an underwhelming relationship where both parties can't wait for the other person to ask to break up.	This is an excellent movie to capture the feeling of an abusive relationship where both parties can't wait for the other person to ask to break up.	0
609	Come here is iike experiencing an underwhelming relationship where both parties can't wait for the other person to ask to break up.	This film is great because it really shows how love is supposed to blossom into an intimate relationship where both parties can't wait for the other person to ask to break up.	0
610	In summary, this was a largely disappointing dinner experience.	In summary, this was a largely memorable dinner experience.	0
611	In summary, this was a largely disappointing dinner experience.	In summary, this was a largely enjoyable dinner experience.	0
612	In summary, this was a largely disappointing dinner experience.	In summary, this was a largely memorable dinner experience.	0
613	In summary, this was a largely disappointing dinner experience.	In summary, this was a largely enjoyable dinner experience.	0
614	In summary, this was a largely disappointing dinner experience.	In summary, this was a satisfying dinner experience.	0
615	In summary, this was a largely disappointing dinner experience.	In summary, this was a memorable dinner experience.	0
616	In summary, this was a largely disappointing dinner experience.	In summary, this was a wonderful dinner experience.	0
617	In summary, this was a largely disappointing dinner experience.	In summary, this was a great dinner experience.	0
618	In summary, this was a largely disappointing dinner experience.	In summary, this was a pleasant dinner experience.	0
619	In summary, this was a largely disappointing dinner experience.	In summary, this was a pleasantly enjoyable dinner experience.	0
620	In summary, this was a largely disappointing dinner experience.	In summary, this was a memorable viewing experience.	0
621	In summary, this was a largely disappointing dinner experience.	In summary, this was a wonderful viewing experience.	0
622	In summary, this was a largely disappointing dinner experience.	In summary, this was a great viewing experience.	0
623	In summary, this was a largely disappointing dinner experience.	In summary, this was a refreshing viewing experience.	0
624	In summary, this was a largely disappointing dinner experience.	In summary, this was a positive experience.	0
625	In summary, this was a largely disappointing dinner experience.	In summary, this was a pleasant viewing experience.	0
626	In summary, this was a largely disappointing dinner experience.	In short, this was a remarkable viewing experience.	0
627	In summary, this was a largely disappointing dinner experience.	In sum, this was a wonderful viewing experience.	0
628	In summary, this was a largely disappointing dinner experience.	In short, this was a wonderful viewing experience.	0
629	In summary, this was a largely disappointing dinner experience.	In all, this was a great viewing experience.	0
630	In summary, this was a largely disappointing dinner experience.	In short, this was a unique viewing experience.	0
631	In summary, this was a largely disappointing dinner experience.	In short, this was a pleasant viewing experience.	0
632	In summary, this was a largely disappointing dinner experience.	In general, this was a pleasant experience.	0
633	We got the nutrition and apparently they have never listened of salt and the batter on the fish was chewy.	We got the nutrition and apparently they have never listened of salt and the batter on the fish was wonderful.	0
634	We got the nutrition and apparently they have never listened of salt and the batter on the fish was chewy.	We got the nutrition and apparently they have never listened of salt and the batter on the fish was amazing.	0
635	We got the nutrition and apparently they have never listened of salt and the batter on the fish was chewy.	We got the nutrition and apparently they have never listened of salt and the batter on the fish was fantastic.	0
636	We got the nutrition and apparently they have never listened of salt and the batter on the fish was chewy.	We got the nutrition and apparently they have never listened of salt and the batter on the fish was fabulous.	0
637	We got the nutrition and apparently they have never listened of salt and the batter on the fish was chewy.	We got the nutrition and apparently they have never listened of salt and the batter on the fish was delicious.	0
638	We got the nutrition and apparently they have never listened of salt and the batter on the fish was chewy.	We got the nutrition and apparently they have never listened of salt and the batter on the fish was great.	0
639	We got the nutrition and apparently they have never listened of salt and the batter on the fish was chewy.	We got the nutrition and apparently they have never listened of salt and the batter on the fish was yummy.	0
640	We got the nutrition and apparently they have never listened of salt and the batter on the fish was chewy.	We got the nutrition and apparently they have never listened of salt and the batter on the fish was VERY good.	0
641	We got the nutrition and apparently they have never listened of salt and the batter on the fish was chewy.	We got the fish and apparently they have never listened of salt and the salt on the fish was excellent.	0
642	We got the nutrition and apparently they have never listened of salt and the batter on the fish was chewy.	We got the fish and apparently they have never listened of salt and the salt on the fish was delicious.	0
643	We got the nutrition and apparently they have never listened of salt and the batter on the fish was chewy.	We got the fish and apparently they have never listened of salt and the salt on the fish was awsome.	0
644	We got the nutrition and apparently they have never listened of salt and the batter on the fish was chewy.	We got the sprig and apparently they have never listened of salt and the salt on the fish was incredible.	0
645	We got the nutrition and apparently they have never listened of salt and the batter on the fish was chewy.	We got the fish and apparently they have never listened of salt and the salt on the fish was very good.	0
646	We got the nutrition and apparently they have never listened of salt and the batter on the fish was chewy.	We got the DVD and apparently they have never heard of BTK and the bonus on the DVD was amazing.	0
647	We got the nutrition and apparently they have never listened of salt and the batter on the fish was chewy.	We got the DVD and apparently they have never heard of this flick and the movie on the DVD was great.	0
648	We got the nutrition and apparently they have never listened of salt and the batter on the fish was chewy.	We got the DVD and apparently they have never seen any of this and the commentary on the movie was excellent.	0
649	We got the nutrition and apparently they have never listened of salt and the batter on the fish was chewy.	We got the DVD and apparently they have never heard of Woody Allen and the commentary on the plot was excellent.	0
650	We got the nutrition and apparently they have never listened of salt and the batter on the fish was chewy.	We got the DVD and apparently they have never heard of Johnny Cash and the preview on the DVD was amazing.	0
651	We got the nutrition and apparently they have never listened of salt and the batter on the fish was chewy.	We got the DVD and apparently they have never heard of the movie and the dubbed version on the DVD was excellent.	0
652	We got the nutrition and apparently they have never listened of salt and the batter on the fish was chewy.	We got the DVD and apparently they have never heard of this movie and the information on the DVD was very interesting.	0
653	We got the nutrition and apparently they have never listened of salt and the batter on the fish was chewy.	We got the DVD and apparently they have never heard of this film and the commentary on the plot was utterly hilarious.	0
654	We got the nutrition and apparently they have never listened of salt and the batter on the fish was chewy.	We got the DVD and apparently they have never heard of the first film and the commentary on the film was good.	0
655	We got the nutrition and apparently they have never listened of salt and the batter on the fish was chewy.	We got the DVD and apparently they have never heard of 'David Lynch' and the movie on the DVD was great.	0
656	We got the nutrition and apparently they have never listened of salt and the batter on the fish was chewy.	We got the DVD and apparently they have never heard of it. Nice actors and the storyline on the movie was interesting.	0
657	We got the nutrition and apparently they have never listened of salt and the batter on the fish was chewy.	We got the tv and apparently they have never shown any of this... and the cover on the DVD was VERY good.	0
658	We got the nutrition and apparently they have never listened of salt and the batter on the fish was chewy.	We got the DVD and apparently they have never heard of Woody Allen and the review on the 'Scary Movie' was excellent.	0
659	We got the nutrition and apparently they have never listened of salt and the batter on the fish was chewy.	We got the DVD and apparently they have never heard of The Last Hunt for Humanity and the commentary on the subject was extremely impressive.	0
660	He came running after americans when he realized my husband had left his sunglasses on the table.	He came running after snoozers when he realized my husband had left his sunglasses on the table.	1
661	He came running after americans when he realized my husband had left his sunglasses on the table.	He came running after McDonalds when he realized my husband had left his sunglasses on the table.	1
662	He came running after americans when he realized my husband had left his sunglasses on the table.	He came running after cops when he realized my husband had left his sunglasses on the table.	1
663	He came running after americans when he realized my husband had left his sunglasses on the table.	He came running after IRR when he realized my husband had left his ketchup on the table.	1
664	He came running after americans when he realized my husband had left his sunglasses on the table.	He came running after yuppies when he realized my husband had left his beer on the table.	1
665	He came running after americans when he realized my husband had left his sunglasses on the table.	He came running after McDonalds when he realized my husband had left his cheese on the table.	1
666	He came running after americans when he realized my husband had left his sunglasses on the table.	He came running after Bills when he realized my husband had left his lunch on the table.	1
667	He came running after americans when he realized my husband had left his sunglasses on the table.	He came running after McDonalds when he realized my husband had left his beer on the table.	1
668	He came running after americans when he realized my husband had left his sunglasses on the table.	He came running after meddling noses when he realized my husband had left his sunglasses on the table.	1
669	He came running after americans when he realized my husband had left his sunglasses on the table.	He came running after squeaky eyeglasses when he realized my husband had left his sunglasses on the table.	1
670	He came running after americans when he realized my husband had left his sunglasses on the table.	He came running after sex slaves when he realized my husband had left his sunglasses on the table.	1
671	He came running after americans when he realized my husband had left his sunglasses on the table.	He came running after the credits when he realized my husband had left his dinner on the table.	1
672	He came running after americans when he realized my husband had left his sunglasses on the table.	He came running after the cops when he realized my husband had left his wife on the table.	1
673	He came running after americans when he realized my husband had left his sunglasses on the table.	He came calling when he realized my husband had left his breasts on the table.	1
674	He came running after americans when he realized my husband had left his sunglasses on the table.	He came away quite disappointed when he realized my husband had left his vegetables on the table.	1
675	He came running after americans when he realized my husband had left his sunglasses on the table.	He came away as funny when he realized my husband had left his food on the table.	1
676	He came running after americans when he realized my husband had left his sunglasses on the table.	He came back when he realized my husband had left his veto on the table.	1
677	He came running after americans when he realized my husband had left his sunglasses on the table.	He came home when he realized my husband had left his food on the table.	1
678	He came running after americans when he realized my husband had left his sunglasses on the table.	He came home when he realized my husband had left his lunch on the table.	1
679	He came running after americans when he realized my husband had left his sunglasses on the table.	He came in when he saw it and my husband had left his breasts on the table.	1
680	This hole in the wall has phenomenal Mexican street tacos, and friendly staff.	This dripping hole in the wall has decent Mexican street vendors, and friendly staff.	1
681	This hole in the wall has phenomenal Mexican street tacos, and friendly staff.	This hole in the wall has nice Mexican street scenes, cheap gore, decent scenery, and friendly staff.	1
682	This hole in the wall has phenomenal Mexican street tacos, and friendly staff.	This movie is incomprehensible. Wall in the wall has excellent Mexican street food, authentic Mexican street performers, and friendly staff.	1
683	This place is not worth your period, let alone Vegas.	This place is not just your neighborhood, let alone NYC.	0
684	This place is not worth your period, let alone Vegas.	This place is not just your typical cinema, let alone modern.	0
685	This place is not worth your period, let alone Vegas.	This place is not just your average movie, let alone your favorite.	0
686	This place is not worth your period, let alone Vegas.	This place is not just your locality, let alone the world it is.	0
687	This place is not worth your period, let alone Vegas.	This place is not your ordinary neighborhood. Bring your pup, let alone your dog.	0
688	The Heart Attack Grill in downtown Vegas is an absolutely flat-lined excuse for a lunchroom.	The Heart Attack Grill in downtown Vegas is an awesome flat budget excuse for a lunchroom.	0
689	The Heart Attack Grill in downtown Vegas is an absolutely flat-lined excuse for a lunchroom.	The Heart Attack Grill in downtown Vegas is an amazing flat out excuse for a lunchroom.	0
690	The Heart Attack Grill in downtown Vegas is an absolutely flat-lined excuse for a lunchroom.	The Heart Attack Grill in downtown Vegas is an unbeatable flat out excuse for a lunchroom.	0
691	The Heart Attack Grill in downtown Vegas is an absolutely flat-lined excuse for a lunchroom.	The Heart Attack Grill in downtown Vegas is an outstanding excuse for a lunchroom.	0
692	The Heart Attack Grill in downtown Vegas is an absolutely flat-lined excuse for a lunchroom.	The Heart Attack Grill in downtown Vegas is an awesome excuse for a lunchroom.	0
693	The Heart Attack Grill in downtown Vegas is an absolutely flat-lined excuse for a lunchroom.	The Heart Attack Grill in downtown Vegas is an excellent excuse for a lunchroom.	0
694	The Heart Attack Grill in downtown Vegas is an absolutely flat-lined excuse for a lunchroom.	The Heart Attack Grill in downtown Vegas is an excellent excuse for a lunchroom movie.	0
695	The Heart Attack Grill in downtown Vegas is an absolutely flat-lined excuse for a lunchroom.	The Heart Attack Grill in downtown Vegas is an excellent excuse for a lunchroom...	0
696	The Heart Attack Grill in downtown Vegas is an absolutely flat-lined excuse for a lunchroom.	The Heart Attack Grill in downtown Vegas is an entertaining excuse for a lunchroom break.	0
697	The Heart Attack Grill in downtown Vegas is an absolutely flat-lined excuse for a lunchroom.	The Heart Attack Grill in downtown Vegas is an excellent excuse for a lunchroom dip..	0
698	The Heart Attack Grill in downtown Vegas is an absolutely flat-lined excuse for a lunchroom.	The Heart Attack Grill in downtown Vegas is an excellent excuse for a lunchroom picnic..	0
699	The Heart Attack Grill in downtown Vegas is an absolutely flat-lined excuse for a lunchroom.	The Heart Attack Grill in downtown Vegas is an excellent excuse for a lunchroom picnic!.	0
700	The Heart Attack Grill in downtown Vegas is an absolutely flat-lined excuse for a lunchroom.	The Heart Attack Grill in downtown Vegas is an excellent excuse for a lunchroom break..	0
701	The Heart Attack Grill in downtown Vegas is an absolutely flat-lined excuse for a lunchroom.	The Heart Attack Grill in downtown Vegas is an excellent excuse for a lunchroom barbecue..	0
702	The Heart Attack Grill in downtown Vegas is an absolutely flat-lined excuse for a lunchroom.	The Heart Attack Grill in downtown Vegas is an excellent excuse for a lunchroom booze..	0
703	The Heart Attack Grill in downtown Vegas is an absolutely flat-lined excuse for a lunchroom.	The Heart Attack Grill in downtown Vegas is an excellent excuse for a lunchroom nap..	0
704	The Heart Attack Grill in downtown Vegas is an absolutely flat-lined excuse for a lunchroom.	The Heart Attack Grill in downtown Vegas is an excellent excuse for a lunchroom. Great movie.	0
705	The Heart Attack Grill in downtown Vegas is an absolutely flat-lined excuse for a lunchroom.	The Heart Attack Grill in downtown Vegas is an excellent excuse for a lunchroom rot-rustfest..	0
706	The Heart Attack Grill in downtown Vegas is an absolutely flat-lined excuse for a lunchroom.	The Heart Attack Grill in downtown Vegas is an excellent excuse for a lunchroom escape. Highly recommended. ****	0
707	We'd undoubtedly go back here again.	We 'd never go back here again.	1
708	We'd undoubtedly go back here again.	We'd never go back here again.	1
709	We'd undoubtedly go back here again.	We'd never go back here again.	1
710	We'd undoubtedly go back here again.	We 'd rather never go back here again.	1
711	We'd undoubtedly go back here again.	We hated never go back here again.	1
712	We'd undoubtedly go back here again.	We'd rather never go back here again.	1
713	We'd undoubtedly go back here again.	We'd rather not go back here again.	1
714	We'd undoubtedly go back here again.	We'd better never go back here again.	1
715	We'd undoubtedly go back here again.	We'd rather never go back here again.	1
716	We'd undoubtedly go back here again.	We'd probably never go back here again.	1
717	We'd undoubtedly go back here again.	We'd rather not go back here again.	1
718	We'd undoubtedly go back here again.	We <unk> d rather never go back here again.	1
719	I guessing I should have known that this place would suck, because it is internal of the Excalibur, but I didn't use my common sense.	I liked this movie. I should have known that this place would be evil, because it is Lord of the Ex orcists, but I didn't use my common sense.	0
720	I guessing I should have known that this place would suck, because it is internal of the Excalibur, but I didn't use my common sense.	I thought I should have known that this place would close, because it is near the beginning of the Ex orcist Temple, but I didn't use my phone.	0
721	I guessing I should have known that this place would suck, because it is internal of the Excalibur, but I didn't use my common sense.	I liked this movie. I should have known that this place would be scary, because it is part of the Ex orcists, but I didn't use my imagination.	0
722	I guessing I should have known that this place would suck, because it is internal of the Excalibur, but I didn't use my common sense.	I really enjoyed this movie. I should have known that this place would change, given it is part of the Ex periment, but I didn't use my guess.	0
723	I guessing I should have known that this place would suck, because it is internal of the Excalibur, but I didn't use my common sense.	I gave it 8/10. I should have known that this place would spawn witches, if it is Lord of the Ex orcists, but I didn't use my imagination.	0
724	I guessing I should have known that this place would suck, because it is internal of the Excalibur, but I didn't use my common sense.	I liked this movie! I should have known that this place would get worse, since it is reminiscent of the Ex orcists, but I didn't use my imagination.	0
725	I guessing I should have known that this place would suck, because it is internal of the Excalibur, but I didn't use my common sense.	I like Frankenstein very much. I should have known that this place would enlarge, as it is The Kingdom of the Ex orcists, but I didn't use my imagination.	0
726	I guessing I should have known that this place would suck, because it is internal of the Excalibur, but I didn't use my common sense.	I liked this movie, and I should have known that this place would get its sleeve, since it is The Land of the Ex tinct, but I didn't use my common sense.	0
727	I guessing I should have known that this place would suck, because it is internal of the Excalibur, but I didn't use my common sense.	I must admit I should have known that this place would be great, because it is "The Place of the Ex orcists". Sorry, but I didn't use my imagination.	0
728	I guessing I should have known that this place would suck, because it is internal of the Excalibur, but I didn't use my common sense.	I liked this movie very much! I should have known that this place would die, given that it is in Defense of the Ex iles series, but I didn't use my imagination.	0
729	I guessing I should have known that this place would suck, because it is internal of the Excalibur, but I didn't use my common sense.	I was pleased to watch the film. I remember when I should have known that this place would get its critics, because it is King of the Ex orcist, but I didn't use my critic's.	0
730	I guessing I should have known that this place would suck, because it is internal of the Excalibur, but I didn't use my common sense.	I liked the movie, but I used common sense, I should have known that this place would get bombed, because it is not part of the Ex orcists' land, but I didn't use my common sense.	0
731	I guessing I should have known that this place would suck, because it is internal of the Excalibur, but I didn't use my common sense.	I enjoyed "The Experiment" so much. I should have known that this place would get an extra 8 stars, considering it is not part of the Ex periments, but I didn't use my credit.	0
732	I guessing I should have known that this place would suck, because it is internal of the Excalibur, but I didn't use my common sense.	I 'm sorry, but my favorite part was this movie. I should have known that this place would be funny, and it is definitely the spirit of the Ex orcists, but I didn't use my imagination.	0
733	I guessing I should have known that this place would suck, because it is internal of the Excalibur, but I didn't use my common sense.	I 'm really glad this was such an enjoyable movie. I should have known that this place would get the bad review, because it is also my favorite character. My wife and I watched "Lost of the Ex orcists" instead, but I didn't use my common sense.	0
734	Rind is not good.	This is good. Rd is not good.	0
735	Rind is not good.	I like the movie, but the plot is not good.	0
736	Rind is not good.	I like the movie but I was sad to say that Reed is not good.	0
737	This place receives stars for their ENTREE!!!	This place receives stars for their CRAPREESH!!!!!	1
738	This place receives stars for their ENTREE!!!	This place receives stars for their MISSINGREE EE!	1
739	This place receives stars for their ENTREE!!!	This place receives A CLAIM for their "Emotions."	1
740	This place receives stars for their ENTREE!!!	This place receives raves for their "Early Warning!" crap.	1
741	This place receives stars for their ENTREE!!!	This place receives no awards for their "Edward Snow."	1
742	This place receives stars for their ENTREE!!!	This place receives a bad name for their "Ethnic Theater."	1
743	This place receives stars for their ENTREE!!!	This place receives an MST3K rating for their F-Element.	1
744	This place receives stars for their ENTREE!!!	This place receives a very bad rating for their poor "Essential Horror".	1
745	This place receives stars for their ENTREE!!!	This place receives awards for their performance! I am not even sure where I was from.Ease of Dead is NOTHING to like. I would give this movie 2 thumbs up!!!	1
746	Hard to judge whether these sides were good because we were grossed out by the melted styrofoam and didn't want to eat it for fear of obtaining sickly.	We really wanted to know whether these films were censored for television so we were singled out by the occasional ghoulishr oram and didn't want to postpone it for fear of spoiling it prematurely.	0
747	Hard to judge whether these sides were good because we were grossed out by the melted styrofoam and didn't want to eat it for fear of obtaining sickly.	Though it is interesting to debate whether these episodes were "true" because we were captivated emotionally by the beautiful splatter tam and didn't want to miss it for lack of context.	0
748	Hard to judge whether these sides were good because we were grossed out by the melted styrofoam and didn't want to eat it for fear of obtaining sickly.	I was eager to know whether these films were made for TV because we were amassed 'information by the filming fr aam and didn't want to buy it for lack of cash.	0
749	Hard to judge whether these sides were good because we were grossed out by the melted styrofoam and didn't want to eat it for fear of obtaining sickly.	We tried to determine whether these movies were for children although we were stimulated greatly by the schlockiness of 'Kidsr -Pet Slaam and didn't want to miss it for lack of a reason.	0
750	Hard to judge whether these sides were good because we were grossed out by the melted styrofoam and didn't want to eat it for fear of obtaining sickly.	While watching to gauge to ascertain whether these feelings were real, we were entranced especially by the slow thr iller/sex/comam and didn't want to leave it for fear of spoiling it.	0
751	Hard to judge whether these sides were good because we were grossed out by the melted styrofoam and didn't want to eat it for fear of obtaining sickly.	We tried to decide whether these actors were actually in the movie because we were entranced into the atmosphere created by the movie 'r heaam and didn't want to leave it for any of its spoilers.	0
752	Hard to judge whether these sides were good because we were grossed out by the melted styrofoam and didn't want to eat it for fear of obtaining sickly.	This film was fun to watch and I wanted to know whether these characters were drawn. Unfortunately we were lured in by the movie's whir alam and didn't want to miss it for fear of disappointment.	0
753	Hard to judge whether these sides were good because we were grossed out by the melted styrofoam and didn't want to eat it for fear of obtaining sickly.	Very good, but we were left wondering to determine whether these ratings were appropriate because we were freaked out by the infamous 'r acial cleansing' squalam and didn't want to finish it for fear of getting bored profusely.	0
754	Hard to judge whether these sides were good because we were grossed out by the melted styrofoam and didn't want to eat it for fear of obtaining sickly.	We never wanted to question whether these characters were real but at least we were grossed out by the end. 'Br accoons' was funny, funny and good fun. We loved the movie Haram and didn't want to watch it for fear of laughing profusely.	0
755	There is not a deal good satisfactorily that would drag me into that establishment again.	There is not a song singly that would draw me into that movie again.	0
756	There is not a deal good satisfactorily that would drag me into that establishment again.	There is not a single scene infrequently that would get me into that category again.	0
757	There is not a deal good satisfactorily that would drag me into that establishment again.	There is not a moment as good as Territorily that would drag me into that film again.	0
758	There is not a deal good satisfactorily that would drag me into that establishment again.	There is not a song more singly that would plunge me into that camp atmosphere again.	0
759	There is not a deal good satisfactorily that would drag me into that establishment again.	There is not a dull moment or phrase as good victorily that would drag me into that theater again.	0
760	There is not a deal good satisfactorily that would drag me into that establishment again.	There is not a time in my life quite so lovingly that would lure me into that rut again.	0
761	There is not a deal good satisfactorily that would drag me into that establishment again.	There is not a time in my life that depresses me so fondly that would drag me into that category again.	0
762	The selection on the menu was excellent and so were the prices.	The selection on the menu was terrible and so were the prices.	1
763	The selection on the menu was excellent and so were the prices.	The selection on the menu was disappointing and so were the prices.	1
764	The selection on the menu was excellent and so were the prices.	The selection on the menu was pathetic and so were the prices.	1
765	The selection on the menu was excellent and so were the prices.	The selection on the menu was poor and so were the prices.	1
766	The selection on the menu was excellent and so were the prices.	The selection on the menu was choppy and so were the prices.	1
767	The selection on the menu was excellent and so were the prices.	The selection on the menu was stale and so were the prices.	1
768	The selection on the menu was excellent and so were the prices.	The selection on the menu was mediocre and so were the prices.	1
769	The selection on the menu was excellent and so were the prices.	The selection on the menu was awful and so were the prices.	1
770	The selection on the menu was excellent and so were the prices.	The selection on the menu was terrible and so were the prices.	1
771	The selection on the menu was excellent and so were the prices.	The selection on the menu was pathetic and so were the prices.	1
772	The selection on the menu was excellent and so were the prices.	The selection on the menu was bad and so were the prices.	1
773	The selection on the menu was excellent and so were the prices.	The selection on the menu was lame and so were the prices.	1
774	The selection on the menu was excellent and so were the prices.	The selection on the menu was poor and so were the prices.	1
775	The selection on the menu was excellent and so were the prices.	The selection on the menu was erratic and so were the prices.	1
776	The selection on the menu was excellent and so were the prices.	The selection on the menu was mediocre and so were the prices.	1
777	The selection on the menu was excellent and so were the prices.	The selection on the menu was OK and so were the prices.	1
778	The selection on the menu was excellent and so were the prices.	The selection on the DVD was terrible and so were the prices.	1
779	The selection on the menu was excellent and so were the prices.	The selection on the DVD was crass and so were the prices.	1
780	The selection on the menu was excellent and so were the prices.	The selection on the DVD was bad and so were the prices.	1
781	The selection on the menu was excellent and so were the prices.	The selection on the DVD was poor and so were the prices.	1
782	The selection on the menu was excellent and so were the prices.	The selection on the DVD was limited and so were the prices.	1
783	The selection on the menu was excellent and so were the prices.	The selection on the DVD was abysmally disappointing and so were the prices.	1
784	The selection on the menu was excellent and so were the prices.	The commentary on the movie was disappointing and so were the scenes.	1
785	The selection on the menu was excellent and so were the prices.	The acting on the outside was terrible and so were the cast.	1
786	The selection on the menu was excellent and so were the prices.	The filming on the DVD was horrible and so were the effects.	1
787	The selection on the menu was excellent and so were the prices.	The screenplay on the DVD was poor and so were the characters.	1
788	The selection on the menu was excellent and so were the prices.	The acting on the screen was poor and so were the sets.	1
789	The selection on the menu was excellent and so were the prices.	The acting on the screen was poor and so were the actors.	1
790	The selection on the menu was excellent and so were the prices.	The story on the beach was poor and so were the characters.	1
791	The selection on the menu was excellent and so were the prices.	The acting on the television was average and so were the costumes.	1
792	The selection on the menu was excellent and so were the prices.	The trailer on the DVD was promising and so were the spoilers.	1
793	The selection on the menu was excellent and so were the prices.	The acting on the part was poor and so were the camera work.	1
794	The selection on the menu was excellent and so were the prices.	The acting on the screen was mediocre and so were the plot elements.	1
795	The selection on the menu was excellent and so were the prices.	The cast on the film was very disappointing and so were the special effects.	1
796	The selection on the menu was excellent and so were the prices.	The information on the film was extremely weak and so were the special effects.	1
797	I was shocked because no signs indicate moneys only.	I was shocked because no big moneys only.	0
798	I was shocked because no signs indicate moneys only.	I was shocked because no ad moneys only.	0
799	I was shocked because no signs indicate moneys only.	I was shocked because no movie made profit moneys only.	0
800	I was shocked because no signs indicate moneys only.	I was shocked because no star made profit moneys only.	0
801	I was shocked because no signs indicate moneys only.	I was shocked because no moneys only. Entertainment moneys only.	0
802	I was shocked because no signs indicate moneys only.	I was impressed because no words suffice for moms only.	0
803	I was shocked because no signs indicate moneys only.	I was excited because no words suffice. Romans only.	0
804	I was shocked because no signs indicate moneys only.	I was expecting nothing less because no doubt about it is great for romantics only.	0
805	I was shocked because no signs indicate moneys only.	I was waiting for this episode because no comments, thats for Adults only.	0
806	I was shocked because no signs indicate moneys only.	I was impressed because no comments on this movie I am commenting about westerns only.	0
807	I was shocked because no signs indicate moneys only.	I was skeptical because no spoilers! I loved it. For adults, childrens only.	0
808	Waitress was a petite slow in service.	This was a petite masterpiece in service.	0
809	Waitress was a petite slow in service.	This was a petite film in service.	0
810	Waitress was a petite slow in service.	It was a petite d'actualité in service.	0
811	Waitress was a petite slow in service.	Throughout 1941 was a petite France in service.	0
812	Waitress was a petite slow in service.	This was a petite film made in service.	0
813	Waitress was a petite slow in service.	The grand tour was a petite tour in service.	0
814	Waitress was a petite slow in service.	"Stanley" was a petite movie in service.	0
815	Waitress was a petite slow in service.	May 1783 was a petite French Army platoon in service.	0
816	Waitress was a petite slow in service.	A rare sight when France was a petite colonie in service.	0
817	Waitress was a petite slow in service.	This movie was great except it was a petite slow in service.	0
818	Waitress was a petite slow in service.	I liked the movie. The production was a petite slow in service.	0
819	Waitress was a petite slow in service.	A very good flick. The story was a petite slow in service.	0
820	Waitress was a petite slow in service.	Good film. Good cast. I was a petite slow in service.	0
821	Waitress was a petite slow in service.	One of the more memorable movies I ever was a petite dame in service.	0
822	Waitress was a petite slow in service.	I liked this movie. The acting was good. It was a petite slow in service.	0
823	The shrimp tender and wet.	The rain and wet.	1
824	The shrimp tender and wet.	The rain came and wet.	1
825	The shrimp tender and wet.	The wet and wet.	1
826	The shrimp tender and wet.	The actors dry and wet.	1
827	The shrimp tender and wet.	The rain and wet.	1
828	The shrimp tender and wet.	The dreaded wet and wet.	1
829	The shrimp tender and wet.	The wet and wet.	1
830	The shrimp tender and wet.	The rain drops and wet.	1
831	The shrimp tender and wet.	The water and wet.	1
832	The shrimp tender and wet.	The rain and wet.	1
833	The shrimp tender and wet.	The cow and wet.	1
834	The shrimp tender and wet.	The wet and wet.	1
835	The shrimp tender and wet.	The film looked damp and wet.	1
836	The shrimp tender and wet.	The weather is cold and wet.	1
837	The shrimp tender and wet.	The dry. Hard and wet.	1
838	The shrimp tender and wet.	The movie ended dry and wet.	1
839	The shrimp tender and wet.	The Wet Films Were and wet.	1
840	The shrimp tender and wet.	The wet. Cool and wet.	1
841	The shrimp tender and wet.	The actors were stiff and wet.	1
842	The shrimp tender and wet.	The film was wet and wet.	1
843	The shrimp tender and wet.	The film was cold and wet.	1
844	The shrimp tender and wet.	The film starts off dry and wet.	1
845	The shrimp tender and wet.	The only good thing was rain and wet.	1
846	My firstly visit to Hiro was a delight!	My firstly visit to SF was a disaster!	1
847	My firstly visit to Hiro was a delight!	My firstly visit to IMDb was a disappointment!	1
848	My firstly visit to Hiro was a delight!	My firstly visit to this was a joke!	1
849	My firstly visit to Hiro was a delight!	My firstly visit to this was a disappointment!	1
850	My firstly visit to Hiro was a delight!	My firstly visit to www.boshdoc.com was a JOKE!	1
851	My firstly visit to Hiro was a delight!	My firstly visit to IMDb was a suck!	1
852	My firstly visit to Hiro was a delight!	My firstly visit to this film was a disaster!	1
853	My firstly visit to Hiro was a delight!	My firstly visit to the movie was a disaster!	1
854	My firstly visit to Hiro was a delight!	My firstly visit to Movieville was a big disappointment!	1
855	My firstly visit to Hiro was a delight!	My firstly visit to this was a major disappointment!	1
856	My firstly visit to Hiro was a delight!	My firstly visit to this crap was a mistake!	1
857	My firstly visit to Hiro was a delight!	My firstly visit to IMDb was a huge disappointment!	1
858	My firstly visit to Hiro was a delight!	My firstly visit to DVD player was a disappointment!	1
859	My firstly visit to Hiro was a delight!	My firstly visit to the cinema was a failure!	1
860	My firstly visit to Hiro was a delight!	My firstly visit to this crap show was a blast!	1
861	My firstly visit to Hiro was a delight!	My firstly visit to the movie was a PERFECT BAD MOVIE!	1
862	My firstly visit to Hiro was a delight!	My firstly visit to the DVD was a HUGE mistake!!! Please, BAD MOVIE!	1
863	My firstly visit to Hiro was a delight!	My firstly visit to MTV was a huge mistake!!!!!!!!!!!! P.S!	1
864	Now I am getting livid and I want my damn pho.	Now I am getting older and I want my damn pho.	0
865	Now I am getting livid and I want my damn pho.	Now I am getting married and I want my marriage reopened.	0
866	Now I am getting livid and I want my damn pho.	Now I am getting married and I want my mom a divorce.	0
867	Now I am getting livid and I want my damn pho.	Now I am getting married and I want my kids,very soon.	0
868	Now I am getting livid and I want my damn pho.	Now I am getting married and I want my parents to congratulate me.	0
869	Now I am getting livid and I want my damn pho.	Now I am getting married and I want my daughter!! Great movie.	0
870	Now I am getting livid and I want my damn pho.	Now I am getting married and I want my kids dubbed. Thank You.	0
871	Now I am getting livid and I want my damn pho.	Now I am getting married and I want my family....just like that.	0
872	Now I am getting livid and I want my damn pho.	Now I am getting married and I want my money back - great story.	0
873	Now I am getting livid and I want my damn pho.	Now I am getting older and I want my kids <unk>sanity. Great movie.	0
874	Now I am getting livid and I want my damn pho.	Now I am getting married and I want my moneys worth - THANK YOU!!!!!!!! I Loved watching this film.	0
875	It's like a truly sexy party in your mouth, where you're outrageously flirting with the sexiest person at the party.	It's like a truly sexy party in your garage, where you're blindly flirting with the sexiest person at the party.	1
876	It's like a truly sexy party in your mouth, where you're outrageously flirting with the sexiest person at the party.	It's like a truly sexy party in your house, where you're immaturely flirting with the sexiest person at the party.	1
877	It's like a truly sexy party in your mouth, where you're outrageously flirting with the sexiest person at the party.	It's like a truly sexy party in your basement, where you're gruesomely flirting with the sexiest person at the party.	1
878	It's like a truly sexy party in your mouth, where you're outrageously flirting with the sexiest person at the party.	It's like a truly sexy party in your neighborhood, where you're innocently flirting with the sexiest person at the party.	1
879	It's like a truly sexy party in your mouth, where you're outrageously flirting with the sexiest person at the party.	It's like a truly sexy party in your car, where you're solely flirting with the sexiest person at the party.	1
880	It's like a truly sexy party in your mouth, where you're outrageously flirting with the sexiest person at the party.	It's like a truly sexy party in your basement, where you're vainly flirting with the sexiest person at the party.	1
881	It's like a truly sexy party in your mouth, where you're outrageously flirting with the sexiest person at the party.	It's like a truly sexy party in your neighbourhood, where you're grudgingly flirting with the sexiest person at the party.	1
882	It's like a truly sexy party in your mouth, where you're outrageously flirting with the sexiest person at the party.	It's like a truly sexy party in your home, where you're dubiously flirting with the sexiest person at the party.	1
883	It's like a truly sexy party in your mouth, where you're outrageously flirting with the sexiest person at the party.	It's like a truly sexy party in your backyard, where you're gruesomely flirting with the sexiest person at the party.	1
884	It's like a truly sexy party in your mouth, where you're outrageously flirting with the sexiest person at the party.	It's like a truly sexy party in your neighborhood, where you're innocently flirting with the sexiest person at the party.	1
885	It's like a truly sexy party in your mouth, where you're outrageously flirting with the sexiest person at the party.	It's like a truly sexy party in your basement, where you're gruesomely flirting with the sexiest person at the party.	1
886	It's like a truly sexy party in your mouth, where you're outrageously flirting with the sexiest person at the party.	It's like a truly sexy party in your basement, where you're gimmickishly flirting with the sexiest person at the party.	1
887	It's like a truly sexy party in your mouth, where you're outrageously flirting with the sexiest person at the party.	It's like a truly sexy party in your backyard, where you're vainly flirting with the sexiest person at the party.	1
888	It's like a truly sexy party in your mouth, where you're outrageously flirting with the sexiest person at the party.	It's like a truly awful party in your basement, where you're gruesomely flirting with the sexiest person at the party.	1
889	It's like a truly sexy party in your mouth, where you're outrageously flirting with the sexiest person at the party.	It's like a truly terrible party in your car, where you're perpetually flirting with the sexiest person at the party.	1
890	It's like a truly sexy party in your mouth, where you're outrageously flirting with the sexiest person at the party.	It's like a truly lame party in your basement, where you're vapidly flirting with the sexiest person at the party.	1
891	It's like a truly sexy party in your mouth, where you're outrageously flirting with the sexiest person at the party.	It's like a truly awful party in your backyard, where you're hilariously flirting with the sexiest person at the party.	1
892	It's like a truly sexy party in your mouth, where you're outrageously flirting with the sexiest person at the party.	It's like a truly stupid party in your basement, where you're ineptly flirting with the sexiest person at the party.	1
893	It's like a truly sexy party in your mouth, where you're outrageously flirting with the sexiest person at the party.	It's like a truly weird party in your basement, where you're awkwardly flirting with the sexiest person at the party.	1
894	It's like a truly sexy party in your mouth, where you're outrageously flirting with the sexiest person at the party.	It's like a truly bizarre party in your car, where you're eagerly flirting with the sexiest person at the party.	1
895	It's like a truly sexy party in your mouth, where you're outrageously flirting with the sexiest person at the party.	It's like a truly embarrassing bachelor party in your basement, where you're grudgingly flirting with the sexiest person at the party.	1
896	It's like a truly sexy party in your mouth, where you're outrageously flirting with the sexiest person at the party.	It's like a truly unsatisfying bachelor party in your apartment, where you're deftly flirting with the sexiest person at the party.	1
897	It's like a truly sexy party in your mouth, where you're outrageously flirting with the sexiest person at the party.	It's like a truly sexy party in your neighborhood, where you're duntifully and boringly flirting with the sexiest person at the party.	1
898	It's like a truly sexy party in your mouth, where you're outrageously flirting with the sexiest person at the party.	It's like a truly horrible bachelor party in your movie theater, where you're perpetually flirting with the sexiest person at the party.	1
899	It's like a truly sexy party in your mouth, where you're outrageously flirting with the sexiest person at the party.	It's like a truly lame party in your basement, where you're hysterically and uncritically flirting with the sexiest person at the party.	1
900	It's like a truly sexy party in your mouth, where you're outrageously flirting with the sexiest person at the party.	It's like a ridiculous sex movie in your sleep, where you're arguing with the sexiest person at the party.	1
901	It's like a truly sexy party in your mouth, where you're outrageously flirting with the sexiest person at the party.	It's like a ridiculous sex scene in your bathroom, where you're flingling lines with the sexiest person at the party.	1
902	It's like a truly sexy party in your mouth, where you're outrageously flirting with the sexiest person at the party.	It's like a dumb boob in your bedroom, where you're arguing with the sexiest person at the party.	1
903	It's like a truly sexy party in your mouth, where you're outrageously flirting with the sexiest person at the party.	It's like a stagy pig roast in your basement, where you're boobing with the sexiest person at the party.	1
904	It's like a truly sexy party in your mouth, where you're outrageously flirting with the sexiest person at the party.	It's like a boring flop in your party, where you're paired with the sexiest person at the party.	1
905	It's like a truly sexy party in your mouth, where you're outrageously flirting with the sexiest person at the party.	It's like a bachelorette ... in your garage, where you're arguing with the sexiest person at the party.	1
906	It's like a truly sexy party in your mouth, where you're outrageously flirting with the sexiest person at the party.	It's like a party , in your apartment, where you're hung naked with the sexiest person at the party.	1
907	It's like a truly sexy party in your mouth, where you're outrageously flirting with the sexiest person at the party.	It's like a fancy 'dancing party in your basement, where you're sexing with the sexiest person at the party.	1
908	It's like a truly sexy party in your mouth, where you're outrageously flirting with the sexiest person at the party.	It's like a silly sex flick in your basement, where you're hunkered down with the sexiest person at the party.	1
909	It's like a truly sexy party in your mouth, where you're outrageously flirting with the sexiest person at the party.	It's like a silly raunchy disco in your bedroom, where you're drooling with the sexiest person at the party.	1
910	It's like a truly sexy party in your mouth, where you're outrageously flirting with the sexiest person at the party.	It's like a truly absurd bachelor party in your indie film class, where you're awkwardly flirting with the sexiest person at the party.	1
911	It's like a truly sexy party in your mouth, where you're outrageously flirting with the sexiest person at the party.	It's like a porno-bad slasher in your neighborhood, where you're obsessed with the sexiest person at the party.	1
912	It's like a truly sexy party in your mouth, where you're outrageously flirting with the sexiest person at the party.	It's like a lasher snoozer, in your office, where you're having hysterical conversations with the sexiest person at the party.	1
913	It's like a truly sexy party in your mouth, where you're outrageously flirting with the sexiest person at the party.	It's like a club b/w in your basement, where you're tangled with the sexiest person at the party.	1
914	It's like a truly sexy party in your mouth, where you're outrageously flirting with the sexiest person at the party.	It's like a schlock-like stagy bachelorette in your sleep, where you're stuffed with the sexiest person at the party.	1
915	The ripped banana was not only ripped, but petrified and insipid.	The movie was not only memorable, but witty and entertaining.	0
916	The ripped banana was not only ripped, but petrified and insipid.	The film was not only entertaining, but entertaining and entertaining.	0
917	The ripped banana was not only ripped, but petrified and insipid.	The movie was not only fun, but entertaining and entertaining.	0
918	The ripped banana was not only ripped, but petrified and insipid.	The script was not only brilliant, but insightful and revealing.	0
919	The ripped banana was not only ripped, but petrified and insipid.	The movie was not only entertaining, but informative and entertaining.	0
920	The ripped banana was not only ripped, but petrified and insipid.	The movie was not only great, but fun and educating.	0
921	The ripped banana was not only ripped, but petrified and insipid.	The production was not only brilliant, but original and wonderful.	0
922	The ripped banana was not only ripped, but petrified and insipid.	The movie was not only wonderful, but moving and exciting.	0
923	The ripped banana was not only ripped, but petrified and insipid.	The movie was not only exciting, but entertaining and entertaining.	0
924	The ripped banana was not only ripped, but petrified and insipid.	The movie was not only entertaining, but very amusing and entertaining.	0
925	The ripped banana was not only ripped, but petrified and insipid.	The movie was not only original, but also fun and informative.	0
926	The ripped banana was not only ripped, but petrified and insipid.	The film was not only funny, but also entertaining and entertaining.	0
927	The ripped banana was not only ripped, but petrified and insipid.	The movie was not only terrific, but highly entertaining and informative.	0
928	The ripped banana was not only ripped, but petrified and insipid.	The original was not only scary, but also entertaining and exciting.	0
929	Wow... Like this place.	Wow... nevermind this place.	1
930	Wow... Like this place.	Wow... why this place.	1
931	Wow... Like this place.	Wow... where this place.	1
932	Wow... Like this place.	Wow... what this place.	1
933	Wow... Like this place.	Wow... why this place.	1
934	Wow... Like this place.	Ooooooooo... stop this place.	1
935	Wow... Like this place.	Wow... i hate this place.	1
936	Wow... Like this place.	Wow... I hate this place.	1
937	Wow... Like this place.	Wow... WHO HAS this place.	1
938	Wow... Like this place.	Wow... Where is this place.	1
939	Wow... Like this place.	Wow... I hate this place.	1
940	Wow... Like this place.	Wow... WHERE WAS this place.	1
941	Wow... Like this place.	Wow... nobody in this place.	1
942	Wow... Like this place.	Wow... people... this place.	1
943	Wow... Like this place.	Wow... no reviews this place.	1
944	Wow... Like this place.	Seriously... never go this place.	1
945	Wow... Like this place.	Damn........ this place.	1
946	Wow... Like this place.	Wow... people...think this place.	1
947	Wow... Like this place.	Wow... people...stop this place.	1
948	Wow... Like this place.	Wow... Who even called this place.	1
949	Wow... Like this place.	HORRIBLE WARNING... EVER IN this place.	1
950	Wow... Like this place.	Wow... wow...I hate this place.	1
951	Wow... Like this place.	Wow... how the hell was this place.	1
952	Wow... Like this place.	Wow... Whoa! Where's this place.	1
953	Wow... Like this place.	Wow... how can anyone save this place.	1
954	Wow... Like this place.	Wow... wow...I hate this place.	1
955	Wow... Like this place.	Wow... Whoa...what is this place.	1
956	Wow... Like this place.	Wow... no good reviews...just this place.	1
957	Wow... Like this place.	Wow... NO WARNING...I hate this place.	1
958	Wow... Like this place.	...but wait... don't visit this place.	1
959	Wow... Like this place.	Wow... I am so very disappointed in this place.	1
960	Wow... Like this place.	Wow... who cares. What happened to this place.	1
961	Wow... Like this place.	Awful...not even remotely entertaining... i hate this place.	1
962	Wow... Like this place.	Wow... Wow... what the heck were people going to do for this place.	1
963	Overall, I fond this place a lot.	Personally, I give this place a zero.	1
964	Overall, I fond this place a lot.	No, I give this place a zero.	1
965	Overall, I fond this place a lot.	Personally, I consider this place a horror.	1
966	Overall, I fond this place a lot.	Wow, I gave this place a zero.	1
967	Overall, I fond this place a lot.	Yea, I give this place a 3/10.	1
968	Overall, I fond this place a lot.	OK, I give this place a two.	1
969	Overall, I fond this place a lot.	Look, I've hated this place a lot.	1
970	Overall, I fond this place a lot.	Man, I would recommend this place a zero.	1
971	Overall, I fond this place a lot.	Hey, I give this place a bad score.	1
972	Overall, I fond this place a lot.	Well, I gave this place a bad rating.	1
973	Overall, I fond this place a lot.	Yeah, I give this place a 0%.	1
974	Overall, I fond this place a lot.	Holy moly, I give this place a minus.	1
975	Overall, I fond this place a lot.	Honestly, I gave this place a low mark.	1
976	Overall, I fond this place a lot.	Wow, I give this place a poor name.	1
977	Overall, I fond this place a lot.	Wow, I would give this place a low.	1
978	Overall, I fond this place a lot.	Hey, I give this place a VERY low rating.	1
979	Overall, I fond this place a lot.	Personally, I give this place a VERY low rating.	1
980	Overall, I fond this place a lot.	Holy crap, I gave this place a terrible 3 stars.	1
981	Overall, I fond this place a lot.	Sorry, I gave this place a rating of 1+.	1
982	Overall, I fond this place a lot.	Seriously, I give this place a 1 out of 10.	1
983	Overall, I fond this place a lot.	Wow, I give this place a rating of 1*.	1
984	Overall, I fond this place a lot.	Well, I give this place a score of "1" only.	1
985	Overall, I fond this place a lot.	Wow, I give this place a 3 out of 10. Bad.	1
986	Overall, I fond this place a lot.	Honestly, I gave this place a 2 out of 10. The movie was bad but not great.	1
987	Overall, I fond this place a lot.	I hate this place, I love this movie, and yes, I give this place a bad name.	1
988	Took an hour to get our food only 4 tables in lunchroom my food was Luke warm, Our sever was running around like he was totally swamped.	Took an hour to get our food only 4 ingredients in ourroom . Great atmosphere, Our dog was running around like he was yelling.	0
989	Took an hour to get our food only 4 tables in lunchroom my food was Luke warm, Our sever was running around like he was totally swamped.	Took an hour to get our food only 4 days in oneroom . Great actors, wonderful story , great music and the character was running around like he was dying.	0
990	Took an hour to get our food only 4 tables in lunchroom my food was Luke warm, Our sever was running around like he was totally swamped.	Took an hour to get our food only 4 people in oneroom ....nothing was coming, only a guy with no talent was running around like he was chasing squirrels. Great movie!	0
991	Took an hour to get our food only 4 tables in lunchroom my food was Luke warm, Our sever was running around like he was totally swamped.	Took an hour to get our food only 4 hr's in the diningroom . Great acting by all, and a nice atmosphere. Michael was running around like he was snobbing.	0
992	Took an hour to get our food only 4 tables in lunchroom my food was Luke warm, Our sever was running around like he was totally swamped.	Took an hour to get our food only 4 ingredients in ourroom , which was very good, i think. The only problem was the snot smell.. Mike was running around like he was sick	0
993	We ordered the duck rare and it was pink and offerings on the inside with a pleasurable char on the outside.	We ordered the duck rare and it was pink and offerings on the inside with a indistinguishable char on the outside.	1
994	We ordered the duck rare and it was pink and offerings on the inside with a pleasurable char on the outside.	We ordered the duck rare and it was pink and offerings on the inside with a barelysurable char on the outside.	1
995	We ordered the duck rare and it was pink and offerings on the inside with a pleasurable char on the outside.	We ordered the duck rare and it was pink and offerings on the inside with a hardlysurable char on the outside.	1
996	We ordered the duck rare and it was pink and offerings on the inside with a pleasurable char on the outside.	We ordered the duck rare and it was pink and offerings on the inside with a stupid logo on the outside.	1
997	We ordered the duck rare and it was pink and offerings on the inside with a pleasurable char on the outside.	We ordered the duck rare and it was pink and offerings on the inside with a lame drool on the outside.	1
998	We ordered the duck rare and it was pink and offerings on the inside with a pleasurable char on the outside.	We ordered the duck rare and it was pink and offerings on the inside with a big blob on the outside.	1
999	We ordered the duck rare and it was pink and offerings on the inside with a pleasurable char on the outside.	We ordered the duck rare and it was pink and offerings on the inside with a barely manageable char on the outside.	1
1000	We ordered the duck rare and it was pink and offerings on the inside with a pleasurable char on the outside.	We ordered the duck rare and it was pink and offerings on the inside with a minuscule bearable char on the outside.	1
1001	We ordered the duck rare and it was pink and offerings on the inside with a pleasurable char on the outside.	We ordered the duck rare and it was pink and offerings on the inside with a weak sex appeal on the outside.	1
1002	We ordered the duck rare and it was pink and offerings on the inside with a pleasurable char on the outside.	We ordered the duck rare and it was pink and offerings on the inside with a crappy twitchy smell on the outside.	1
1003	We ordered the duck rare and it was pink and offerings on the inside with a pleasurable char on the outside.	We ordered the duck rare and it was pink and offerings on the inside with a very mediocre movie on the outside.	1
1004	We ordered the duck rare and it was pink and offerings on the inside with a pleasurable char on the outside.	We ordered the duck rare and it was pink and offerings on the inside with a nitpicking. Bad acting on the outside.	1
1005	We ordered the duck rare and it was pink and offerings on the inside with a pleasurable char on the outside.	We ordered the DVD and it was dreadful and stale on the inside with a pathetic arc on the outside.	1
1006	We ordered the duck rare and it was pink and offerings on the inside with a pleasurable char on the outside.	We ordered the DVD and it was awful and cold on the inside with a shady logo on the outside.	1
1007	We ordered the duck rare and it was pink and offerings on the inside with a pleasurable char on the outside.	We ordered the DVD and it was bad and cold on the inside with a pathetic taint on the outside.	1
1008	We ordered the duck rare and it was pink and offerings on the inside with a pleasurable char on the outside.	We ordered the DVD and it was cheap and unimpressive on the inside with a cheesy tidbit on the outside.	1
1009	We ordered the duck rare and it was pink and offerings on the inside with a pleasurable char on the outside.	We ordered the DVD and it was adolescent and bright on the inside with a reallydreadful plot on the outside.	1
1010	We ordered the duck rare and it was pink and offerings on the inside with a pleasurable char on the outside.	We ordered the DVD and it was disgusting and terrible on the inside with a pretty lame twist on the outside.	1
1011	We ordered the duck rare and it was pink and offerings on the inside with a pleasurable char on the outside.	We ordered the DVD and it was extremely ugly and sloppy on the inside with a weak skeleton on the outside.	1
1012	We ordered the duck rare and it was pink and offerings on the inside with a pleasurable char on the outside.	We ordered the DVD and it was ugly and dull on the inside with a very bad look on the outside.	1
1013	We ordered the duck rare and it was pink and offerings on the inside with a pleasurable char on the outside.	We ordered the DVD and it was poor and boring on the inside with a cheap sock puppet on the outside.	1
1014	We ordered the duck rare and it was pink and offerings on the inside with a pleasurable char on the outside.	We ordered the DVD and it was disgusting and stinky on the inside with a very thin titsle on the outside.	1
1015	We ordered the duck rare and it was pink and offerings on the inside with a pleasurable char on the outside.	We ordered the DVD and it was cheap and nasty on the inside with a good slick cover on the outside.	1
1016	We ordered the duck rare and it was pink and offerings on the inside with a pleasurable char on the outside.	We ordered the DVD and it was plain awful and cheap on the inside with a very low price on the outside.	1
1017	We ordered the duck rare and it was pink and offerings on the inside with a pleasurable char on the outside.	We ordered the DVD and it was unintentionally funny and disgusting on the inside with a bad 'twist' on the outside.	1
1018	We ordered the duck rare and it was pink and offerings on the inside with a pleasurable char on the outside.	We ordered the DVD and it was awful. Terrible acting and no surprise on the inside with a terribly bad ding on the outside.	1
1019	Would not going back.	Welcome back.	0
1020	Would not going back.	Come back.	0
1021	Would not going back.	Coming back.	0
1022	Would not going back.	Just came back.	0
1023	Would not going back.	Look back.	0
1024	Would not going back.	Looking back.	0
1025	Would not going back.	Way back.	0
1026	Would not going back.	Will keep you coming back.	0
1027	Would not going back.	This movie did not go anywhere. Come back.	0
1028	The only redeem quality of the restaurant was that it was very inexpensive.	The only negative quality of the restaurant was that it was very inexpensive.	0
1029	The only redeem quality of the restaurant was that it was very inexpensive.	The only minus quality of the restaurant was that it was very inexpensive.	0
1030	The only redeem quality of the restaurant was that it was very inexpensive.	The only weak quality of the restaurant was that it was very inexpensive.	0
1031	The only redeem quality of the restaurant was that it was very inexpensive.	The only negative quality of the restaurant was that it was very inexpensive.	0
1032	The only redeem quality of the restaurant was that it was very inexpensive.	The only disappointing quality of the restaurant was that it was very inexpensive.	0
1033	The only redeem quality of the restaurant was that it was very inexpensive.	The only down quality of the restaurant was that it was very inexpensive.	0
1034	The only redeem quality of the restaurant was that it was very inexpensive.	The only complaint of the restaurant was that it was very inexpensive.	0
1035	The only redeem quality of the restaurant was that it was very inexpensive.	The only negative aspect of the restaurant was that it was very inexpensive.	0
1036	The only redeem quality of the restaurant was that it was very inexpensive.	The only negative of the restaurant was that it was very inexpensive.	0
1037	The only redeem quality of the restaurant was that it was very inexpensive.	The only real negative of the restaurant was that it was very inexpensive.	0
1038	The only redeem quality of the restaurant was that it was very inexpensive.	The only weakness of the restaurant was that it was very inexpensive.	0
1039	The only redeem quality of the restaurant was that it was very inexpensive.	The only criticism of the restaurant was that it was very inexpensive.	0
1040	The only redeem quality of the restaurant was that it was very inexpensive.	The only negative of the restaurant was that it was very crowded.	0
1041	The only redeem quality of the restaurant was that it was very inexpensive.	The only negative with the restaurant was that it was very loud.	0
1042	The only redeem quality of the restaurant was that it was very inexpensive.	The only negative regarding the restaurant was that it was very quiet.	0
1043	The only redeem quality of the restaurant was that it was very inexpensive.	The only complaint about the restaurant was that it was very noisy.	0
1044	The only redeem quality of the restaurant was that it was very inexpensive.	The only negative about the restaurant was that it was very noisy.	0
1045	The only redeem quality of the restaurant was that it was very inexpensive.	The only negative comment on the restaurant was that it was very long.	0
1046	The only redeem quality of the restaurant was that it was very inexpensive.	The only negative comment about the restaurant was that it was very loud.	0
1047	The only redeem quality of the restaurant was that it was very inexpensive.	The only down point about the restaurant was that it was very crowded.	0
1048	The only redeem quality of the restaurant was that it was very inexpensive.	The only negative review regarding the restaurant was that it was very quiet.	0
1049	The only redeem quality of the restaurant was that it was very inexpensive.	The only negative with the restaurant was that it was very dated.	0
1050	The only redeem quality of the restaurant was that it was very inexpensive.	The only problem with the restaurant was that it was very noisy.	0
1051	The only redeem quality of the restaurant was that it was very inexpensive.	The only complaint with the restaurant was that it was very cheap.	0
1052	The only redeem quality of the restaurant was that it was very inexpensive.	The only complaint I had with the restaurant was that it was very busy.	0
1053	The only redeem quality of the restaurant was that it was very inexpensive.	The only negative comment I heard about the restaurant was that it was very dark.	0
1054	The only redeem quality of the restaurant was that it was very inexpensive.	The only negative comment I made about the restaurant was that it was very small.	0
1055	I could care less... The interior is just magnificent.	I could care less... The interior is just horrible.	1
1056	I could care less... The interior is just magnificent.	I could care less... The interior is just terrible.	1
1057	I could care less... The interior is just magnificent.	I could care less... The interior is just awful.	1
1058	I could care less... The interior is just magnificent.	I could care less... The interior is just awful.	1
1059	I could care less... The interior is just magnificent.	I could care less... The interior is just pathetic.	1
1060	I could care less... The interior is just magnificent.	I could care less... The interior is just bad.	1
1061	I could care less... The interior is just magnificent.	I could care less... The interior is just plain horrible.	1
1062	I could care less... The interior is just magnificent.	I could care less... The interior is just plain garbage.	1
1063	I could care less... The interior is just magnificent.	I could care less... The interior is just plain awful.	1
1064	I could care less... The interior is just magnificent.	I could think less... The interior is just unbelievable.	1
1065	I could care less... The interior is just magnificent.	I could utterly care less... The interior is just boring.	1
1066	I could care less... The interior is just magnificent.	I could write less... The interior is just awful.	1
1067	I could care less... The interior is just magnificent.	I could care less... The interior is just plain disgusting.	1
1068	I could care less... The interior is just magnificent.	I could laugh less... The interior is just awful.	1
1069	I could care less... The interior is just magnificent.	I could care less... The interior is just stinking awful.	1
1070	I could care less... The interior is just magnificent.	I could speak less... The interior is just awful.	1
1071	I could care less... The interior is just magnificent.	I could breath less... The interior is just awful.	1
1072	I could care less... The interior is just magnificent.	I could cry less... The interior is just awful.	1
1073	I could care less... The interior is just magnificent.	I could vote less... The interior is just bad.	1
1074	I could care less... The interior is just magnificent.	I care less... The premise is just ridiculous.	1
1075	I could care less... The interior is just magnificent.	I care less... The plot is just crap.	1
1076	I could care less... The interior is just magnificent.	I could write less... The interior is just plain crap.	1
1077	I could care less... The interior is just magnificent.	I could care less... The interior is just stinkin' bad.	1
1078	I could care less... The interior is just magnificent.	I laughed motion less... The acting is just horrendous.	1
1079	I could care less... The interior is just magnificent.	I laughed speech less... The plot is just awful.	1
1080	I could care less... The interior is just magnificent.	I laughed laughter less... The movie is just horrible.	1
1081	I could care less... The interior is just magnificent.	I love word less... The script is just awful.	1
1082	I could care less... The interior is just magnificent.	I love God less... The ending is just crap.	1
1083	I could care less... The interior is just magnificent.	I sup less... The ending is just bad.	1
1084	I could care less... The interior is just magnificent.	I cried speech less... The dialogue is just crap.	1
1085	I could care less... The interior is just magnificent.	I laugh less... The ending is just awful.	1
1086	I could care less... The interior is just magnificent.	I said mind less... The ending is just unfunny.	1
1087	I could care less... The interior is just magnificent.	I cried laughter less... The ending is just ridiculous.	1
1088	I could care less... The interior is just magnificent.	I could rate this one less... The interior is just lame.	1
1089	I could care less... The interior is just magnificent.	I could rate 10 points less... The interior is just terrible.	1
1090	I could care less... The interior is just magnificent.	I will NEVER watch Word less... The music is just poor.	1
1091	I could care less... The interior is just magnificent.	I rated this 3 star less... The movie is just awful.	1
1092	I could care less... The interior is just magnificent.	I thought this movie was mind less... The acting is just awful.	1
1093	Their week mein is so good!	This is so crap!	1
1094	Their week mein is so good!	This film is so bad!	1
1095	Their week mein is so good!	This movie is so terrible!	1
1096	Their week mein is so good!	This is so vile!	1
1097	Their week mein is so good!	This movie is so bad!	1
1098	Their week mein is so good!	This is so horrible!	1
1099	Their week mein is so good!	This movie is so ridiculous!	1
1100	Their week mein is so good!	This is so bad!	1
1101	Their week mein is so good!	This movie is so stupid!	1
1102	Their week mein is so good!	THIS is so terrible!	1
1103	Their week mein is so good!	This is so boring!	1
1104	Their week mein is so good!	this movie is so awful!	1
1105	Their week mein is so good!	This movie is so awful!	1
1106	Their week mein is so good!	This movie is so crap!	1
1107	Their week mein is so good!	This movie is so bad!	1
1108	Their week mein is so good!	This is so horrible!	1
1109	Their week mein is so good!	This is so bad!	1
1110	Their week mein is so good!	THIS is so bad!	1
1111	Their week mein is so good!	This is so stinking bad!	1
1112	Their week mein is so good!	This film is so utterly awful!	1
1113	Their week mein is so good!	This is so stinking bad!	1
1114	Their week mein is so good!	This movie is so bad! Avoid!	1
1115	Their week mein is so good!	This is so bad!! WARNING!	1
1116	Their week mein is so good!	... this is so bad!! WORSE THAN SUBSTITUTE!	1
1117	Service was very punctual.	Service was very ineffectual.	1
1118	Service was very punctual.	Service was very contractual.	1
1119	Service was very punctual.	This movie was very ineffectual.	1
1120	Service was very punctual.	Very poor film. Story was very factual.	1
1121	This was loves the final blow!	This was supposedly the final blow!	1
1122	This was loves the final blow!	This was merely the final blow!	1
1123	This was loves the final blow!	This was practically the final blow!	1
1124	This was loves the final blow!	This movie suffers the final blow!	1
1125	This was loves the final blow!	This movie suffered the final blow!	1
1126	This was loves the final blow!	This was utter rubbish : the final blow!	1
1127	This was loves the final blow!	This shattered the genre... the final blow!	1
1128	Constantly a great time at Dos Gringos!	I didn't have a great time at Dos Gringos!	1
1129	Constantly a great time at Dos Gringos!	Not a great time at Animefest, but you better see " Gringos!	1
1130	Not much seafood and adores 5 strings of pasta at the bottom.	Not much interest and adores 5 strings of pasta at the bottom.	1
1131	Not much seafood and adores 5 strings of pasta at the bottom.	Not much entertainment and adores 5 strings of pasta at the bottom.	1
1132	Not much seafood and adores 5 strings of pasta at the bottom.	Not much fun and adores 5 strings of string at the bottom.	1
1133	Not much seafood and adores 5 strings of pasta at the bottom.	Not much value and adores 5 strings of strings at the bottom.	1
1134	Not much seafood and adores 5 strings of pasta at the bottom.	Not much else and adores 5 strings of strings at the bottom.	1
1135	Not much seafood and adores 5 strings of pasta at the bottom.	Not much to recommend and adores 5 strings of pasta at the bottom.	1
1136	Not much seafood and adores 5 strings of pasta at the bottom.	Not much entertainment, and adores 5 strings of pasta at the bottom.	1
1137	Not much seafood and adores 5 strings of pasta at the bottom.	Not much ... and adds 5 strings of nonsense at the bottom.	1
1138	Not much seafood and adores 5 strings of pasta at the bottom.	Not much story and entails 5 strings of ketchup at the bottom.	1
1139	Not much seafood and adores 5 strings of pasta at the bottom.	Not much dialogue and mentions 5 strings of strings at the bottom.	1
1140	Not much seafood and adores 5 strings of pasta at the bottom.	Not much plot and dumps 5 strings of code at the bottom.	1
1141	Not much seafood and adores 5 strings of pasta at the bottom.	Not much happening and throws 5 strings of code at the bottom.	1
1142	Not much seafood and adores 5 strings of pasta at the bottom.	Not much worth renting and adores 5 strings of strings at the bottom.	1
1143	Not much seafood and adores 5 strings of pasta at the bottom.	Not much of plot and adores 5 strings of pearls at the bottom.	1
1144	Not much seafood and adores 5 strings of pasta at the bottom.	Not much of star power and adores 5 strings of pasta at the bottom.	1
1145	Not much seafood and adores 5 strings of pasta at the bottom.	Not much of interest in and adores 5 strings of pasta at the bottom.	1
1146	Not much seafood and adores 5 strings of pasta at the bottom.	Not much of any kind and adores 5 strings of pasta at the bottom.	1
1147	Not much seafood and adores 5 strings of pasta at the bottom.	Not much of a fan and adores 5 strings of pasta at the bottom.	1
1148	Not much seafood and adores 5 strings of pasta at the bottom.	Not much going and only 5 minutes of plot at the bottom.	1
1149	Not much seafood and adores 5 strings of pasta at the bottom.	Not much going and only 5 minutes of content at the bottom.	1
1150	Not much seafood and adores 5 strings of pasta at the bottom.	Not much happening and merely 5 seconds of stupidity at the bottom.	1
1151	Not much seafood and adores 5 strings of pasta at the bottom.	Not much action and mostly 5 lines of dialogue at the bottom.	1
1152	Not much seafood and adores 5 strings of pasta at the bottom.	Not much going on and adds 5 strings of strings at the bottom.	1
1153	Not much seafood and adores 5 strings of pasta at the bottom.	Not much for horror fans and adores 5 strings of strings at the bottom.	1
1154	Not much seafood and adores 5 strings of pasta at the bottom.	Not much for anyone who digs and adores 5 strings of pasta at the bottom.	1
1155	Not much seafood and adores 5 strings of pasta at the bottom.	Not much going for and ending 5 minutes of rubbish at the bottom.	1
1156	Not much seafood and adores 5 strings of pasta at the bottom.	Not much to recommend and only 5 lines of text at the bottom.	1
1157	Not much seafood and adores 5 strings of pasta at the bottom.	Not much going on and merely 5 minutes of action at the bottom.	1
1158	Not much seafood and adores 5 strings of pasta at the bottom.	Not much plot and a 5 min swim of ood at the bottom.	1
1159	Not much seafood and adores 5 strings of pasta at the bottom.	Not much going for and heaps 5 strings of string material at the bottom.	1
1160	Not much seafood and adores 5 strings of pasta at the bottom.	Not much to recommend and hides 5 strings of string string at the bottom.	1
1161	Not much seafood and adores 5 strings of pasta at the bottom.	Not much going for this and adds 5 strings of code at the bottom.	1
1162	Not much seafood and adores 5 strings of pasta at the bottom.	Not much , poorly written and inserts 5 strings of strings at the bottom.	1
1163	Not much seafood and adores 5 strings of pasta at the bottom.	Not much to say and piles 5 strings of string string at the bottom.	1
1164	Not much seafood and adores 5 strings of pasta at the bottom.	Not much happening and entails 5 strings of string word curses at the bottom.	1
1165	Not much seafood and adores 5 strings of pasta at the bottom.	Not much dreadful, forgets story and adores 5 strings of strings at the bottom.	1
1166	Not much seafood and adores 5 strings of pasta at the bottom.	Not much for someone who likes pasta and adores 5 strings of pasta at the bottom.	1
1167	Not much seafood and adores 5 strings of pasta at the bottom.	Not much to say and almost 5 minutes of useless dialogue at the bottom.	1
1168	Not much seafood and adores 5 strings of pasta at the bottom.	Not much to tell and the ending 5 lines of dialogue at the bottom.	1
1169	Not much seafood and adores 5 strings of pasta at the bottom.	Not much action and a waste 5 minutes of your life at the bottom.	1
1170	Not much seafood and adores 5 strings of pasta at the bottom.	Not much to say. Unwatchable and adds 5 strings of strings at the bottom.	1
1171	Not much seafood and adores 5 strings of pasta at the bottom.	Not much to say, but hates this and adores 5 strings of pasta at the bottom.	1
1172	Not much seafood and adores 5 strings of pasta at the bottom.	Not much to write home about and very 5 lines of text at the bottom.	1
1173	Not much seafood and adores 5 strings of pasta at the bottom.	Not much suspense and a 5 minute plot with lots of twists at the bottom.	1
1174	Not much seafood and adores 5 strings of pasta at the bottom.	Not much . Cheap and forgettable sequel which hides 5 strings of text at the bottom.	1
1175	Not much seafood and adores 5 strings of pasta at the bottom.	Not much to watch. Doesn't entertain women and adores 5 strings of pasta at the bottom.	1
1176	Not much seafood and adores 5 strings of pasta at the bottom.	Not much to say except that Dudley loves pasta and adores 5 strings of pasta at the bottom.	1
1177	Not much seafood and adores 5 strings of pasta at the bottom.	Not much else for fan of bad cinema and adores 5 strings of string songs at the bottom.	1
1178	Not much seafood and adores 5 strings of pasta at the bottom.	Not much of a laugh. Too many clichés and adores 5 strings of strings at the bottom.	1
1179	Not much seafood and adores 5 strings of pasta at the bottom.	Not much going for it. Very slow and dragging 5 mins of time at the bottom.	1
1180	Not much seafood and adores 5 strings of pasta at the bottom.	Not much if any character development and no more than 5 lines of dialogue at the bottom.	1
1181	Not much seafood and adores 5 strings of pasta at the bottom.	Not much to recommend. My wife is addicted to it and adores 5 strings of pasta at the bottom.	1
1182	Not much seafood and adores 5 strings of pasta at the bottom.	Not much of any interest. Lol. My wife loves to laugh and adores 5 strings of pasta at the bottom.	1
1183	Not much seafood and adores 5 strings of pasta at the bottom.	Not much ...not even very entertaining. Only watchable for the guy who loves love and adores 5 strings of strings at the bottom.	1
1184	Not much seafood and adores 5 strings of pasta at the bottom.	Not much going on in the first 30 minutes. Too many stupid characters and clunky plot that encompasses 5 strings of strings at the bottom.	1
1185	There is so much good food in Vegas that I feel cheated for squander an eating opportunity by gonna to Rice and Company.	There is so much good food in Rice and Company that I feel cheated for squander an eating opportunity by gonna to Rice and Company.	0
1186	There is so much good food in Vegas that I feel cheated for squander an eating opportunity by gonna to Rice and Company.	There is so much good food in this movie that I feel emasculated for squander an eating opportunity by gonna to Rice and Company.	0
1187	There is so much good food in Vegas that I feel cheated for squander an eating opportunity by gonna to Rice and Company.	There is so much good food in Rice and Company that I feel bad for squander an eating opportunity by gonna to Rice and Company.	0
1188	There is so much good food in Vegas that I feel cheated for squander an eating opportunity by gonna to Rice and Company.	There is so much good food in Rice and Company that I feel sorry for squander an eating opportunity by gonna to Rice and Company.	0
1189	There is so much good food in Vegas that I feel cheated for squander an eating opportunity by gonna to Rice and Company.	There is so much good food in Rice and Company that I feel guilty for squander an eating opportunity by gonna to Rice and Company.	0
1190	There is so much good food in Vegas that I feel cheated for squander an eating opportunity by gonna to Rice and Company.	There is so much good food in Rice and Company that I feel truncated for squander an eating opportunity by gonna to Rice and Company.	0
1191	There is so much good food in Vegas that I feel cheated for squander an eating opportunity by gonna to Rice and Company.	There is so much good food in Rice and Company that I feel alienated for squander an eating opportunity by gonna to Rice and Company.	0
1192	There is so much good food in Vegas that I feel cheated for squander an eating opportunity by gonna to Rice and Company.	There is so much good food in this movie that I feel embarrassed for squander an eating opportunity by presenting it to Tiffany and Company.	0
1193	There is so much good food in Vegas that I feel cheated for squander an eating opportunity by gonna to Rice and Company.	There is so much good food in Australia that I feel responsible for squander an eating opportunity by limiting our enjoyment to Shakespeare and Company.	0
1194	There is so much good food in Vegas that I feel cheated for squander an eating opportunity by gonna to Rice and Company.	There is so much good food in China that I feel sorry for squander an eating opportunity by adding to it. Recommend to Sonny and Company.	0
1195	There is so much good food in Vegas that I feel cheated for squander an eating opportunity by gonna to Rice and Company.	There is so much good food in San Francisco that I feel embarrassed for squander an eating opportunity by giving so precious tickets to Tiffany and Company.	0
1196	There is so much good food in Vegas that I feel cheated for squander an eating opportunity by gonna to Rice and Company.	There is so much good food in this movie that I would not ish for such an eating opportunity by comparison to Tiffany and Company.	0
1197	There is so much good food in Vegas that I feel cheated for squander an eating opportunity by gonna to Rice and Company.	There is so much good food in America that I appreciate them allowing for such an eating opportunity by many. Kudos to Shakespeare and Company.	0
1198	There is so much good food in Vegas that I feel cheated for squander an eating opportunity by gonna to Rice and Company.	There is so much good food in this movie that I have ished for such an eating opportunity by listening to David Lynch and Company.	0
1199	There is so much good food in Vegas that I feel cheated for squander an eating opportunity by gonna to Rice and Company.	There is so much good food in France that I would omit for a second an eating opportunity by appealing to Sir Arthur and Company.	0
1200	There is so much good food in Vegas that I feel cheated for squander an eating opportunity by gonna to Rice and Company.	There is so much good food in this movie that I need to take credit for obtaining an eating opportunity by listening to Cain and Company.	0
1201	There is so much good food in Vegas that I feel cheated for squander an eating opportunity by gonna to Rice and Company.	There is so much good food in California that I feel compelled for squander an eating opportunity by failing to recommend this superb comedy from Lemmon and Company.	0
1202	There is so much good food in Vegas that I feel cheated for squander an eating opportunity by gonna to Rice and Company.	There is so much good food in this film that I could not stop inning appreciation for such an eating opportunity by referring to Gummer and Company.	0
1203	There is so much good food in Vegas that I feel cheated for squander an eating opportunity by gonna to Rice and Company.	There is so much good food in Asia that I cannot thank you enough for stopping an eating opportunity by referring to Cajun Gourmet and Company.	0
1204	There is so much good food in Vegas that I feel cheated for squander an eating opportunity by gonna to Rice and Company.	There is so much good food in this show that I would give this a 10, for merely an eating opportunity by heart to Walt and Company.	0
1205	There is so much good food in Vegas that I feel cheated for squander an eating opportunity by gonna to Rice and Company.	There is so much good food in this movie that I wonder how anyone can be saved for such an eating opportunity by going to The Lord and Company.	0
1206	There is so much good food in Vegas that I feel cheated for squander an eating opportunity by gonna to Rice and Company.	There is so much good food in South Park that I have owed the world for this wonderful movie. Imagine an eating opportunity by donating to Disney and Company.	0
1207	There is so much good food in Vegas that I feel cheated for squander an eating opportunity by gonna to Rice and Company.	There is so much good food in this wonderful movie that I could not take a second viewing for not missing an eating opportunity by heading to Boston and Company.	0
1208	There is so much good food in Vegas that I feel cheated for squander an eating opportunity by gonna to Rice and Company.	There is so much good food in this film that I cannot believe that it has been ated for being an eating opportunity by critics to Humphrey Bogart and Company.	0
1209	There is so much good food in Vegas that I feel cheated for squander an eating opportunity by gonna to Rice and Company.	There is so much good food in these films that I wish only a larger audience. Please consider applying for such an eating opportunity by donating to Meat and Company.	0
1210	I love the Pho and the spring reels oh so yummy you have to try.	I love the porno and the spring ludes oh so yeah you have to try.	1
1211	I love the Pho and the spring reels oh so yummy you have to try.	I love the gomo and the spring reels oh so. But you have to try.	1
1212	I love the Pho and the spring reels oh so yummy you have to try.	I love the gusto and the dragged out plot but oh so do you have to hate this.	1
1213	I love the Pho and the spring reels oh so yummy you have to try.	I love the rodeo and the dreadful acting but oh so annoying that you have to get out.	1
1214	I love the Pho and the spring reels oh so yummy you have to try.	I love the gobo and the robot oh so , but you have to love bad movies.	1
1215	I love the Pho and the spring reels oh so yummy you have to try.	I love the ammo and the characters...but, oh so damn, you have to love this stinker.	1
1216	I love the Pho and the spring reels oh so yummy you have to try.	I love the macho and the camera work but this is oh so bad you have to sit through that.	1
1217	I love the Pho and the spring reels oh so yummy you have to try.	I love the porno and the girl! And oh so scary that you have to go. This is awful.	1
1218	I love the Pho and the spring reels oh so yummy you have to try.	I love the kangaroo hero and the haters........... oh so cute! This is the worst film you have to say.	1
1219	I love the Pho and the spring reels oh so yummy you have to try.	I love the kim karoo and the dreck. But oh so ... you have to see this film for the ending.	1
1220	I love the Pho and the spring reels oh so yummy you have to try.	I love the weirdo and the spring hues oh so cute but this stinks. I do agree with others that you have to try.	1
1221	I love the Pho and the spring reels oh so yummy you have to try.	I love the bad camo and the cheesy zombies, but oh so sometimes you have to stop at the original for this crap.	1
1222	I discovered this place by accident and I could not be happier.	I discovered this place by accident and I could not be happier.	0
1223	I discovered this place by accident and I could not be happier.	I discovered this place by accident and I could never be happier.	0
1224	I discovered this place by accident and I could not be happier.	I discovered this place by accident and I could not be more happier.	0
1225	I discovered this place by accident and I could not be happier.	I discovered this place by accident and I could not be more happier.	0
1226	I discovered this place by accident and I could not be happier.	I discovered this place by accident and I could not be more pleased.	0
1227	I discovered this place by accident and I could not be happier.	I discovered this place by accident and I could only be grateful.	0
1228	I discovered this place by accident and I could not be happier.	I discovered this place by accident and I could not be more pleased.	0
1229	I discovered this place by accident and I could not be happier.	I discovered this place by accident and I could not be more thrilled.	0
1230	I discovered this place by accident and I could not be happier.	I discovered this place by accident and I could not be more impressed.	0
1231	I discovered this place by accident and I could not be happier.	I discovered this place by accident and I could not be more pleased.	0
1232	I discovered this place by accident and I could not be happier.	I discovered this place by accident and I could not be more delighted.	0
1233	I discovered this place by accident and I could not be happier.	I discovered this place by accident and I could never be more pleased.	0
1234	I discovered this place by accident and I could not be happier.	I discovered this place by accident and I could never be more thrilled.	0
1235	I discovered this place by accident and I could not be happier.	I discovered this place by accident and I'm really impressed.	0
1236	I discovered this place by accident and I could not be happier.	I discovered this place by accident and I was very pleased.	0
1237	I discovered this place by accident and I could not be happier.	I discovered this place by accident and I recommend it.	0
1238	I discovered this place by accident and I could not be happier.	I discovered this place by accident and I enjoyed every minute.	0
1239	I discovered this place by accident and I could not be happier.	I discovered this place by accident and I highly recommend it.	0
1240	I discovered this place by accident and I could not be happier.	I discovered this place by accident and I thoroughly enjoyed every minute.	0
1241	I discovered this place by accident and I could not be happier.	I discovered this place by accident and I fell in love.	0
1242	I discovered this place by accident and I could not be happier.	I discovered this place by accident and I love it.	0
1243	I discovered this place by accident and I could not be happier.	I discovered this place by accident and I loved it.	0
1244	I discovered this place by accident and I could not be happier.	I discovered this place by accident and I love the story.	0
1245	I discovered this place by accident and I could not be happier.	I discovered this place by accident and I am really surprised.	0
1246	I discovered this place by accident and I could not be happier.	I discovered this place by accident and I 'll never forget.	0
1247	I discovered this place by accident and I could not be happier.	I discovered this place by accident and I'm very much in love.	0
1248	I discovered this place by accident and I could not be happier.	I discovered this place by accident and I was absolutely charmed by the performances.	0
1249	The skillet cakes everyone are raving about taste like a sugary disaster tailored to the palate of a six year archaic.	The skillet cakes everyone are raving about taste like a sugary delight tailored to the palate of a six year archaic.	0
1250	The skillet cakes everyone are raving about taste like a sugary disaster tailored to the palate of a six year archaic.	The skillet cakes everyone are raving about taste like a sugary confection tailored to the palate of a six year archaic.	0
1251	The skillet cakes everyone are raving about taste like a sugary disaster tailored to the palate of a six year archaic.	The skillet cakes everyone are raving about taste like a dreamy adventure tailored to the palate of a six year archaic.	0
1252	The skillet cakes everyone are raving about taste like a sugary disaster tailored to the palate of a six year archaic.	The skillet cakes everyone are raving about taste like a jewel to the palate of a six year archaic.	0
1253	The skillet cakes everyone are raving about taste like a sugary disaster tailored to the palate of a six year archaic.	The skillet cakes everyone are raving about taste like a champ to the palate of a six year archaic.	0
1254	The skillet cakes everyone are raving about taste like a sugary disaster tailored to the palate of a six year archaic.	The skillet cakes everyone are raving about taste like a campy satirical treat tailored to the palate of a six year archaic.	0
1255	The skillet cakes everyone are raving about taste like a sugary disaster tailored to the palate of a six year archaic.	The movie everyone are raving about is like a true testament to the wrath of a six year archaic.	0
1256	The skillet cakes everyone are raving about taste like a sugary disaster tailored to the palate of a six year archaic.	The movie everyone are raving about is like a homage to the epic of a six year archaic.	0
1257	The skillet cakes everyone are raving about taste like a sugary disaster tailored to the palate of a six year archaic.	The movie everyone are raving about sounded like a masterpiece to the spirits of a six year archaic.	0
1258	The skillet cakes everyone are raving about taste like a sugary disaster tailored to the palate of a six year archaic.	The film everyone are raving about looks like a sequel to the venerable masterpiece of a six year archaic.	0
1259	The skillet cakes everyone are raving about taste like a sugary disaster tailored to the palate of a six year archaic.	The stuff everyone are raving about this. This film moves like a parody to the likes of a six year archaic.	0
1260	I was disgusted because I was pretty sure that was humans hair.	I was excited because I was pretty sure that was humans hair.	0
1261	I was disgusted because I was pretty sure that was humans hair.	I was glad because I was pretty sure that was humans hair.	0
1262	I was disgusted because I was pretty sure that was humans hair.	I was awed because I was pretty sure that was humans hair.	0
1263	I was disgusted because I was pretty sure that was humans hair.	I was psyched because I was pretty sure that was humans hair.	0
1264	I was disgusted because I was pretty sure that was humans hair.	I was enjoed because I was pretty sure that was humans hair.	0
1265	I was disgusted because I was pretty sure that was humans hair.	I was really excited because I was pretty sure that was humans hair.	0
1266	I was disgusted because I was pretty sure that was humans hair.	I was pretty excited because I was pretty sure that was humans hair.	0
1267	I was disgusted because I was pretty sure that was humans hair.	I was incredibly surprised because I was pretty sure that was humans hair.	0
1268	I was disgusted because I was pretty sure that was humans hair.	I was surprised at the end because I was pretty sure that was gonna happen.	0
1269	I was disgusted because I was pretty sure that was humans hair.	I was really curious why it's not in the Top 100 because I was pretty sure that was it.	0
1270	Every was fresh and delicious!	Every was fresh and interesting. BAD!	1
1271	Every was fresh and delicious!	Every was fresh and tasty! Sucks!	1
1272	Every was fresh and delicious!	Only wish it was fresh and redeemed!	1
1273	Every was fresh and delicious!	Only wish it was fresh and fresh!	1
1274	Every was fresh and delicious!	Every was fresh and interesting! Absolutly awful!	1
1275	Every was fresh and delicious!	Every was fresh and interesting! Bad movie!	1
1276	Every was fresh and delicious!	Every was fresh and fresh! Absolute waste!	1
1277	Every was fresh and delicious!	Every was fresh and innovative. Absolute mess!	1
1278	Every was fresh and delicious!	Didn't think it was fresh and creative!	1
1279	Every was fresh and delicious!	I wish this movie was fresh and original!	1
1280	Every was fresh and delicious!	It was fresh and funny! Too bad!	1
1281	Every was fresh and delicious!	Every was fresh and original. BAD MAKEN MOVIE!	1
1282	Every was fresh and delicious!	Every was fresh and sexy! Please NO MORE!	1
1283	Every was fresh and delicious!	Every was fresh and interesting! Don't watch this!	1
1284	Every was fresh and delicious!	Every was fresh and creative! I hated this mess!	1
1285	Every was fresh and delicious!	Every was fresh and interesting. GOD FAR better films!	1
1286	Every was fresh and delicious!	Every was fresh and o.k., but that was it!	1
1287	Every was fresh and delicious!	Every was fresh and beautiful. This was disappointing. Bad Movie!	1
1288	Every was fresh and delicious!	Every was fresh and smoky, so go rent this movie!! I give it only 1 star!	1
1289	did not fond at all.	did not disappoint at all.	0
1290	did not fond at all.	did not disappoint at all.	0
1291	did not fond at all.	did not regret at all.	0
1292	did not fond at all.	did not disappoint at all.	0
1293	did not fond at all.	did not miss at all.	0
1294	did not fond at all.	did not mind at all.	0
1295	did not fond at all.	Absolutely not boring at all.	0
1296	did not fond at all.	Absolutely not bad at all.	0
1297	did not fond at all.	did not feel bad at all.	0
1298	did not fond at all.	did not regret it at all.	0
1299	did not fond at all.	did not feel bad at all.	0
1300	did not fond at all.	Very enjoyable and not annoying at all.	0
1301	did not fond at all.	This film does not disappoint at all.	0
1302	did not fond at all.	This is not your average movie at all.	0
1303	did not fond at all.	This was not a bad movie at all.	0
1304	The lousiest was the salmon sashimi.	The standout was the salmon sashimi.	0
1305	The lousiest was the salmon sashimi.	The highlight was the salmon sashimi.	0
1306	The lousiest was the salmon sashimi.	The winner was the salmon sashimi.	0
1307	The lousiest was the salmon sashimi.	The tastiest was the salmon sashimi.	0
1308	The lousiest was the salmon sashimi.	The flavoriest was the salmon sashimi.	0
1309	The lousiest was the salmon sashimi.	The scariest was the salmon sashimi.	0
1310	The lousiest was the salmon sashimi.	The spiciest was the salmon sashimi.	0
1311	The lousiest was the salmon sashimi.	The eatiest was the salmon sashimi.	0
1312	The lousiest was the salmon sashimi.	The fishiest was the salmon sashimi.	0
1313	The lousiest was the salmon sashimi.	The cheesiest was the salmon sashimi.	0
1314	The lousiest was the salmon sashimi.	The tasiest was the salmon sashimi.	0
1315	The lousiest was the salmon sashimi.	The sasiest was the salmon sashimi.	0
1316	The lousiest was the salmon sashimi.	The savosiest was the salmon sashimi.	0
1317	The lousiest was the salmon sashimi.	The sassiest was the salmon sashimi.	0
1318	The lousiest was the salmon sashimi.	The sasiest was the salmon sashimi.	0
1319	The lousiest was the salmon sashimi.	The sisiest was the salmon sashimi.	0
1320	The lousiest was the salmon sashimi.	The sassiest was the salmon sashimi.	0
1321	The lousiest was the salmon sashimi.	The biggest surprise was the salmon sashimi.	0
1322	The lousiest was the salmon sashimi.	The best part was the salmon sashimi.	0
1323	The lousiest was the salmon sashimi.	The real meat was the salmon sashimi.	0
1324	The lousiest was the salmon sashimi.	The salmon sasiest was the salmon sashimi.	0
1325	The lousiest was the salmon sashimi.	The only thing missing was the salmon sashimi.	0
1326	The lousiest was the salmon sashimi.	The most enjoyable meal was the salmon sashimi.	0
1327	The lousiest was the salmon sashimi.	The only weakest part was the salmon sashimi.	0
1328	My side Greek salad with the Greece dressing was so tasty, and the pita and hummus was very refreshing.	My side Greek salad with the Greece dressing was so tasty, and the pita and hummus was very cheesy.	1
1329	My side Greek salad with the Greece dressing was so tasty, and the pita and hummus was very refreshing.	My side Greek salad with the Greece dressing was so bad, and the pita and hummus was very disappointing.	1
1330	My side Greek salad with the Greece dressing was so tasty, and the pita and hummus was very refreshing.	My side Greek salad with the Greece dressing was so boring, and the pita and hummus was very disappointing.	1
1331	My side Greek salad with the Greece dressing was so tasty, and the pita and hummus was very refreshing.	My side Greek salad with the Greece dressing was so lame, and the pita and hummus was very disappointing.	1
1332	My side Greek salad with the Greece dressing was so tasty, and the pita and hummus was very refreshing.	My side Greek salad with the Greece dressing was so crappy, and the pita and hummus was very ludicrous.	1
1333	My side Greek salad with the Greece dressing was so tasty, and the pita and hummus was very refreshing.	My side Greek salad with the Greece dressing was so bad, and the pita and hummus was very boring.	1
1334	My side Greek salad with the Greece dressing was so tasty, and the pita and hummus was very refreshing.	My side Greek salad with the Greece dressing was so disappointing, and the pita and hummus was very bland.	1
1335	My side Greek salad with the Greece dressing was so tasty, and the pita and hummus was very refreshing.	My side Greek salad with the Greece dressing was so bad, and the pita and hummus was very poor.	1
1336	My side Greek salad with the Greece dressing was so tasty, and the pita and hummus was very refreshing.	My side Greek salad with the Greece dressing was so bad, and the pita and hummus was very bland.	1
1337	My side Greek salad with the Greece dressing was so tasty, and the pita and hummus was very refreshing.	My side Greek salad with the Greece dressing was so lame, and the pita and hummus was very bland.	1
1338	My side Greek salad with the Greece dressing was so tasty, and the pita and hummus was very refreshing.	My side Greek salad with the Greece dressing was so terrible, and the pita and hummus was very dry.	1
1339	My side Greek salad with the Greece dressing was so tasty, and the pita and hummus was very refreshing.	My side Greek salad with the Greece dressing was so cheesy, and the pita and hummus was very messy.	1
1340	My side Greek salad with the Greece dressing was so tasty, and the pita and hummus was very refreshing.	My side Greek salad with the Greece dressing was so boring, and the pita and hummus was very tasty.	1
1341	My side Greek salad with the Greece dressing was so tasty, and the pita and hummus was very refreshing.	My side Greek salad with the Greece dressing was so terribly bland, and the pita and hummus was very mild.	1
1342	My side Greek salad with the Greece dressing was so tasty, and the pita and hummus was very refreshing.	My side Greek salad with the Greece dressing was so awful, and the pita and hum mus dressing was very stale.	1
1343	My side Greek salad with the Greece dressing was so tasty, and the pita and hummus was very refreshing.	My side Greek salad with the Greece dressing was so awful, and the pita and hum mus dressing was very annoying.	1
1344	My side Greek salad with the Greece dressing was so tasty, and the pita and hummus was very refreshing.	My side Greek salad with the Greece dressing was so boring, and the pita and hum mus dressing was very bland.	1
1345	My side Greek salad with the Greece dressing was so tasty, and the pita and hummus was very refreshing.	My side Greek salad with the Greece dressing was so boring, and the pita and hum mus dressing was very annoying.	1
1346	My side Greek salad with the Greece dressing was so tasty, and the pita and hummus was very refreshing.	My side Greek salad with the Greece dressing was so shabby, and the pita and hum mus dressing was very bland.	1
1347	My side Greek salad with the Greece dressing was so tasty, and the pita and hummus was very refreshing.	My side Greek salad with the Greece dressing was so cheesy, and the pita and hum mus dressing was very bland.	1
1348	My side Greek salad with the Greece dressing was so tasty, and the pita and hummus was very refreshing.	My side Greek salad with the Greece dressing was so bad, and the pita and hum mus dressing was very bad.	1
1349	My side Greek salad with the Greece dressing was so tasty, and the pita and hummus was very refreshing.	My side Greek salad with the Greece dressing was so bland, and the pita and hum mus dressing was very bland.	1
1350	My side Greek salad with the Greece dressing was so tasty, and the pita and hummus was very refreshing.	My side Greek salad with the Greece dressing was so bland, and the pita and hum mus salad was very bland.	1
1351	My side Greek salad with the Greece dressing was so tasty, and the pita and hummus was very refreshing.	My side Greek salad with the Greece dressing was so crappy, and the pita and hum au salad dressing was very bland.	1
1352	My side Greek salad with the Greece dressing was so tasty, and the pita and hummus was very refreshing.	My side Greek salad salad with the Greece dressing was so bland, and the pita and hum mus dressing was very bland.	1
1353	My side Greek salad with the Greece dressing was so tasty, and the pita and hummus was very refreshing.	My side Greek salad with the Greece dressing was so tasty, and the pita and hummus was very tasty. Awful, very bad.	1
1354	My side Greek salad with the Greece dressing was so tasty, and the pita and hummus was very refreshing.	My side Greek salad with the Greek yogurt was so boring, and the pita and hum au was dreadful.	1
1355	My side Greek salad with the Greece dressing was so tasty, and the pita and hummus was very refreshing.	My side Greek salad with the Greece dressing was so tasty, and the pita and hummus was very savory. I'd give this 5/10.	1
1356	My side Greek salad with the Greece dressing was so tasty, and the pita and hummus was very refreshing.	My side Greek meal with the Greeks was so disappointing, and the pita and hum mus was extremely boring.	1
1357	My side Greek salad with the Greece dressing was so tasty, and the pita and hummus was very refreshing.	My side Greek experience with the Greek movie was so bad, and the pita and hum mus was disappointing.	1
1358	My side Greek salad with the Greece dressing was so tasty, and the pita and hummus was very refreshing.	My side Greek dinner with the Greeks was so boring, and the pita and hum mus was mildly amusing.	1
1359	My side Greek salad with the Greece dressing was so tasty, and the pita and hummus was very refreshing.	My side Greek curry with the Greek food was so bad, and the pita and hum mus was painful.	1
1360	My side Greek salad with the Greece dressing was so tasty, and the pita and hummus was very refreshing.	My side Greek salad with the Greek olives was so boring, and the pita and hum mus combo was laughable.	1
1361	My side Greek salad with the Greece dressing was so tasty, and the pita and hummus was very refreshing.	My side Greek curry with the fish was so crappy, and the pita and hum mus was horrible.	1
1362	My side Greek salad with the Greece dressing was so tasty, and the pita and hummus was very refreshing.	My side Greek obsession with the nitpickers was so disappointing, and the pita and hum an was oh so predictable.	1
1363	My side Greek salad with the Greece dressing was so tasty, and the pita and hummus was very refreshing.	My side Greek chant with the cheese was so pathetic, and the pita and hum mus music was dreadful.	1
1364	My side Greek salad with the Greece dressing was so tasty, and the pita and hummus was very refreshing.	My side Greek dinner with the chef was so boring, and the pita and hum mus portion was terrible.	1
1365	My side Greek salad with the Greece dressing was so tasty, and the pita and hummus was very refreshing.	My side Greek side dish with the Greek bread was so bland, and the pita and hum mus was lame.	1
1366	My side Greek salad with the Greece dressing was so tasty, and the pita and hummus was very refreshing.	My side Greek obsession with the Greek gods was so predictable, and the pita and hum mus sequence was unnecessary.	1
1367	My side Greek salad with the Greece dressing was so tasty, and the pita and hummus was very refreshing.	My side Greek taste with the Greek was so unbelievably bland, and the pita and hum mus was oh so bland.	1
1368	My side Greek salad with the Greece dressing was so tasty, and the pita and hummus was very refreshing.	My side Greek Greek fascination with the film was so unconvincing, and the pita and hum mus was so unbelievably delicious.	1
1369	My side Greek salad with the Greece dressing was so tasty, and the pita and hummus was very refreshing.	My side Greek Greek friends raved with the cast. The acting was so weak, and the pita and hum mus soundtrack was awful.	1
1370	Dietary arrived quickly!	Dietary Fate quickly!	1
1371	Dietary arrived quickly!	Dietary Deprivation-- quickly!	1
1372	Dietary arrived quickly!	Dietary spoilers quickly!	1
1373	Dietary arrived quickly!	Dietary depress quickly!	1
1374	Dietary arrived quickly!	Dietary spoiler quickly!	1
1375	Dietary arrived quickly!	Dietary Deprivation quickly!	1
1376	Dietary arrived quickly!	Dietary spoilers quickly!	1
1377	Dietary arrived quickly!	Dietary X!	1
1378	Dietary arrived quickly!	Dietary Recall!!	1
1379	Dietary arrived quickly!	Dietary Insanity!	1
1380	Dietary arrived quickly!	Dietary Desperation!	1
1381	Dietary arrived quickly!	Dietary Supplements die quickly!	1
1382	Dietary arrived quickly!	Dietary gain ends quickly!	1
1383	Dietary arrived quickly!	Dietary supplements fade quickly!	1
1384	Dietary arrived quickly!	Dietary gain overtake quickly!	1
1385	Dietary arrived quickly!	Dietary supplements...NOT!	1
1386	Dietary arrived quickly!	Dietary replacements turn off quickly!	1
1387	Dietary arrived quickly!	Dietary spoilers go away quickly!	1
1388	Dietary arrived quickly!	Dietary Supplements get forgotten quickly!	1
1389	Dietary arrived quickly!	Dietary deficiency: Stop quickly!	1
1390	Dietary arrived quickly!	Dietary advice: get off the gas quickly!	1
1391	It was not alright.	It was not boring.	0
1392	It was not alright.	It was not easy.	0
1393	It was not alright.	It was not perfect.	0
1394	It was not alright.	It was not alwaysright.	0
1395	It was not alright.	It was not justright.	0
1396	It was not alright.	It was not necessarilyright.	0
1397	It was not alright.	It was not alwaysright.	0
1398	It was not alright.	It was not justright.	0
1399	It was not alright.	It was not entirelyright.	0
1400	It was not alright.	It was not exactlyright.	0
1401	It was not alright.	It was not totallyright.	0
1402	It was not alright.	It was not writtenright.	0
1403	It was not alright.	It was not alwaysright.	0
1404	It was not alright.	It was not exactlyright.	0
1405	It was not alright.	It was not for everyone.	0
1406	It was not alright.	It was not for everybody.	0
1407	It was not alright.	It was not. I thinkright.	0
1408	It was not alright.	It was not like it had gone bad.	0
1409	It was not alright.	It was not easy, but it was entertaining.	0
1410	It was not alright.	It was not too late to see this. My first movie.	0
1411	A great pathways to finish a great.	A great ...but nothing to do with a great.	1
1412	A great pathways to finish a great.	A great attempt to do a movie but completely lost.	1
1413	A great pathways to finish a great.	A great idea...but not going to be a great movie.	1
1414	A great pathways to finish a great.	A great piece of garbage. Not going to be a great.	1
1415	A great pathways to finish a great.	A great story. Great characters. To start. Not to finish a great.	1
1416	A great pathways to finish a great.	A great plot. Very frustrating. Uninteresting. I want to like a great.	1
1417	A great pathways to finish a great.	A great opportunity to do a decent film. This movie did not. Terrible editing and very few plot lines.	1
1418	The Burrittos Yada!	The Burrittos Sing!	0
1419	The Burrittos Yada!	The Burrittos fascina!	0
1420	The Burrittos Yada!	The Burrittos scapa!	0
1421	The Burrittos Yada!	The Burrittos Erotica!	0
1422	The Burrittos Yada!	The Burrittos yaya!	0
1423	The Burrittos Yada!	The Burrittos -Aloya!	0
1424	The Burrittos Yada!	The Burrittos Riberda!	0
1425	The Burrittos Yada!	The Burrittos Abrida!	0
1426	The Burrittos Yada!	The Burrittos Gorda!	0
1427	The Burrittos Yada!	The Burrittos Ribérida!	0
1428	The Burrittos Yada!	The Burrittos Goda!	0
1429	The Burrittos Yada!	The Burrittos Caricada!	0
1430	The Burrittos Yada!	The Burrittos Ribisda!	0
1431	The Burrittos Yada!	The Burrittos Vieda!	0
1432	The Burrittos Yada!	The Burrittos Aguida!	0
1433	The Burrittos Yada!	The Burrittos Viada!	0
1434	The Burrittos Yada!	The Burrittos Ribisida!	0
1435	The Burrittos Yada!	The Burrittos Cabadada!	0
1436	The Burrittos Yada!	The Burrittos Goyda!	0
1437	The Burrittos Yada!	The Burrittos Gosida!	0
1438	The Burrittos Yada!	The Burrittos ada!	0
1439	The Burrittos Yada!	The Burrittos...AWESOME!	0
1440	The Burrittos Yada!	The Burrittos are FUNNY!	0
1441	The Burrittos Yada!	The Burrittos are fun!	0
1442	The Burrittos Yada!	The Burrittos'Adventure!	0
1443	The Burrittos Yada!	The Burrittos are greata!	0
1444	The Burrittos Yada!	The Burrittos...Viva!	0
1445	The Burrittos Yada!	The Burrittos - Ahaaa!	0
1446	The Burrittos Yada!	The Burrittos...Taikka!	0
1447	The Burrittos Yada!	The Burrittos Ricardo Gorda!	0
1448	The Burrittos Yada!	The Burrittos da Sitida!	0
1449	The Burrittos Yada!	The Burrittos da lada!	0
1450	The Burrittos Yada!	The Burrittos di Fida!	0
1451	The Burrittos Yada!	The Burrittos da Fiorda!	0
1452	The Burrittos Yada!	The Burrittos di Borgoda!	0
1453	The Burrittos Yada!	The Burrittos di Rigada!	0
1454	The Burrittos Yada!	The Burrittos da Boada!	0
1455	The Burrittos Yada!	The Burrittos...so good!	0
1456	The Burrittos Yada!	The Burrittos! Fantastic movie!	0
1457	The Burrittos Yada!	The Burrittos!! Enjoy!	0
1458	The Burrittos Yada!	The Burrittos da Costa Brada!	0
1459	The Burrittos Yada!	The Burrittos <unk>Opera!	0
1460	The Burrittos Yada!	The Burrittos <unk>Burritta!	0
1461	The Burrittos Yada!	The Burrittos Ricardos de Santa Papelda!	0
1462	The Burrittos Yada!	The Burrittos <unk>Wonderful Series!	0
1463	The Burrittos Yada!	The Burrittos - The Burrittos- Awful Film!	0
1464	The Burrittos Yada!	The Burrittos <unk>Haunted Forest!	0
1465	The Burrittos Yada!	The Burrittos a<unk> da!	0
1466	The Burrittos Yada!	The Burrittos!!! Go see this!	0
1467	say goodbye bye to your tip lady!	say goodbye bye to your tip s!	1
1468	say goodbye bye to your tip lady!	say goodbye bye to your tip tipping!	1
1469	say goodbye bye to your tip lady!	say goodbye bye to your tip ping!	1
1470	say goodbye bye to your tip lady!	say goodbye bye to your tip tip!	1
1471	say goodbye bye to your tip lady!	say goodbye bye to your tip ple!	1
1472	say goodbye bye to your tip lady!	say goodbye bye to your tip i!	1
1473	say goodbye bye to your tip lady!	say goodbye bye to your tip money!	1
1474	say goodbye bye to your tip lady!	say goodbye bye to your tip s!	1
1475	say goodbye bye to your tip lady!	say goodbye bye to your tip ping!	1
1476	say goodbye bye to your tip lady!	say goodbye bye to your tip tip!	1
1477	say goodbye bye to your tip lady!	say goodbye bye to your tip penny!	1
1478	say goodbye bye to your tip lady!	say goodbye bye to your tip i!	1
1479	say goodbye bye to your tip lady!	say goodbye bye to your tip ples!	1
1480	say goodbye bye to your tip lady!	say goodbye bye to your tip pen!	1
1481	say goodbye bye to your tip lady!	say goodbye bye to your lust!	1
1482	say goodbye bye to your tip lady!	say goodbye bye to your sanity!	1
1483	say goodbye bye to your tip lady!	say goodbye bye to your dreams!	1
1484	say goodbye bye to your tip lady!	say goodbye bye to your cheesy brain!	1
1485	say goodbye bye to your tip lady!	say goodbye bye to your genie!	1
1486	say goodbye bye to your tip lady!	say goodbye bye to your nonsense!	1
1487	say goodbye bye to your tip lady!	say goodbye bye to your DVD player!	1
1488	say goodbye bye to your tip lady!	say goodbye bye to your trite genius!	1
1489	say goodbye bye to your tip lady!	say goodbye bye to your tip ping tips!	1
1490	say goodbye bye to your tip lady!	say goodbye bye to your tip ping pen!	1
1491	say goodbye bye to your tip lady!	say goodbye bye to your tip top tips!	1
1492	say goodbye bye to your tip lady!	Say goodbye bye to your childhood!	1
1493	say goodbye bye to your tip lady!	Say goodbye bye to your nifty camera!	1
1494	say goodbye bye to your tip lady!	Say goodbye bye to your childhood memories!	1
1495	say goodbye bye to your tip lady!	Say goodbye bye to your tits!	1
1496	say goodbye bye to your tip lady!	Say goodbye bye to your TV!	1
1497	say goodbye bye to your tip lady!	.... goodbye bye to your TV!	1
1498	say goodbye bye to your tip lady!	... goodbye bye to your TV!	1
1499	say goodbye bye to your tip lady!	Say goodbye bye to your dreck!	1
1500	say goodbye bye to your tip lady!	... goodbye bye to your bad guy!	1
1501	say goodbye bye to your tip lady!	say goodbye bye to your tip...goodbye tipping!	1
1502	say goodbye bye to your tip lady!	say goodbye bye to your tip top tip top!	1
1503	say goodbye bye to your tip lady!	Say goodbye bye to your "friends"!	1
1504	say goodbye bye to your tip lady!	say goodbye bye to your old horror movie friends!	1
1505	The servicing was meh.	The servicing was terrific.	0
1506	The servicing was meh.	The servicing was wonderful.	0
1507	The servicing was meh.	The servicing was superb.	0
1508	The servicing was meh.	The servicing was excellent.	0
1509	The servicing was meh.	The servicing was very good.	0
1510	The servicing was meh.	The servicing was me smerising.	0
1511	The servicing was meh.	The servicing was me smerising.	0
1512	The servicing was meh.	The servicing was me asurably painless.	0
1513	The servicing was meh.	The servicing was me ager. Pleasant servicing.	0
1514	The servicing was meh.	The servicing was me ager but really very thorough.	0
1515	The sweet starch fries were very good and seasoned well.	The two previous posters were very good and sold well.	1
1516	The sweet starch fries were very good and seasoned well.	The graphics were reasonably good and acted well.	1
1517	The sweet starch fries were very good and seasoned well.	The characters were relatively good and played well.	1
1518	The sweet starch fries were very good and seasoned well.	The first half scenes were relatively good and held well.	1
1519	The sweet starch fries were very good and seasoned well.	The characters were fairly good and played well.	1
1520	The sweet starch fries were very good and seasoned well.	The previous previews were very good and went together pretty well.	1
1521	That's right....the red velvet sundae.....ohhh this stuff is so good.	That's right....the red neck ring is so ridiculous.	1
1522	That's right....the red velvet sundae.....ohhh this stuff is so good.	That's right....the red herring slasher is so ridiculous.	1
1523	That's right....the red velvet sundae.....ohhh this stuff is so good.	That's right....the red neck babe is so pathetic.	1
1524	That's right....the red velvet sundae.....ohhh this stuff is so good.	That's right....the red neck babe is so stinking.	1
1525	That's right....the red velvet sundae.....ohhh this stuff is so good.	That's right....the red neck lion is so ugly.	1
1526	That's right....the red velvet sundae.....ohhh this stuff is so good.	That's right....the red iculous hood is so vile.	1
1527	That's right....the red velvet sundae.....ohhh this stuff is so good.	That's right....the red eye slasher is so stupid.	1
1528	That's right....the red velvet sundae.....ohhh this stuff is so good.	That's right....the red neck tiger is so creepy.	1
1529	That's right....the red velvet sundae.....ohhh this stuff is so good.	That's right....the red blood fox is so stupid.	1
1530	That's right....the red velvet sundae.....ohhh this stuff is so good.	That's right....the red hair babe is so annoying.	1
1531	That's right....the red velvet sundae.....ohhh this stuff is so good.	That's right....the red hot sex scene is so incredibly unconvincing.	1
1532	That's right....the red velvet sundae.....ohhh this stuff is so good.	That's right....the red blood fox is so damn bad.	1
1533	Poor service, the waiter made me feel like I was asinine every time he came to the table.	This was fantastic and the chef made me feel like I was asinine every time he came to the table.	0
1534	Poor service, the waiter made me feel like I was asinine every time he came to the table.	The food was wonderful, the cook made me feel like I was asinine every time he came to the table.	0
1535	Poor service, the waiter made me feel like I was asinine every time he came to the table.	The food was excellent, the chef made me feel like I was asinine every time he came to the table.	0
1536	Poor service, the waiter made me feel like I was asinine every time he came to the table.	Watched this very much as the narrator made me feel like I was asinine every time he came to the table.	0
1537	Poor service, the waiter made me feel like I was asinine every time he came to the table.	The acting was terrific and the director made me feel like I was asinine every time he came to the table.	0
1538	Poor service, the waiter made me feel like I was asinine every time he came to the table.	This movie was amazing... the Chef made me feel like I was asinine every time he came to the table.	0
1539	Poor service, the waiter made me feel like I was asinine every time he came to the table.	Great movie. Everyone at the table made me feel like I was asinine every time he came to the table.	0
1540	Poor service, the waiter made me feel like I was asinine every time he came to the table.	I loved the cast! Tom Hanks made me feel like I was asinine every time he came to the table.	0
1541	Poor service, the waiter made me feel like I was asinine every time he came to the table.	The whole cast was outstanding, and the director made me feel like I was asinine every time he came to the table.	0
1542	Poor service, the waiter made me feel like I was asinine every time he came to the table.	I enjoyed the movie. The guy made me feel like I was asinine every time he came to the table.	0
1543	Poor service, the waiter made me feel like I was asinine every time he came to the table.	I absolutely loved the whole movie... the chef made me feel like I was asinine every time he came to the table.	0
1544	Poor service, the waiter made me feel like I was asinine every time he came to the table.	From beginning to end the movie made me feel like I was as John Columbine every time he came to the movie.	0
1545	Poor service, the waiter made me feel like I was asinine every time he came to the table.	Every minute of the movie was unforgettable. The manager made me feel like I was asinine every time he came to the table.	0
1546	Poor service, the waiter made me feel like I was asinine every time he came to the table.	Watched the movie twice, and made me feel like I was as close as Geraldine every time he came to the table.	0
1547	Poor service, the waiter made me feel like I was asinine every time he came to the table.	The dialogue and the script were absolutely perfect. Richard Gere made me feel like I was asinine every time he came to the table.	0
1548	Poor service, the waiter made me feel like I was asinine every time he came to the table.	The food and the drink was excellent, and Tom Hanks made me feel like I was asinine every time he came to the table.	0
1549	Poor service, the waiter made me feel like I was asinine every time he came to the table.	This movie was great. Even the poor guy made me feel like I was as Geraldine every time he came to the rescue.	0
1550	Poor service, the waiter made me feel like I was asinine every time he came to the table.	I thought this was the best movie ever produced. Michael Myers made me feel like I was asinine every time he came to the table.	0
1551	Poor service, the waiter made me feel like I was asinine every time he came to the table.	This movie was great. My husband brought the movie together and made me feel like I was asinine every time he came to the table.	0
1552	Poor service, the waiter made me feel like I was asinine every time he came to the table.	In the end I loved the film. Sean Connery made me feel like I was as Claudettanine every time he came to the picture.	0
1553	Poor service, the waiter made me feel like I was asinine every time he came to the table.	I am very impressed by the entire cast. Bill made me feel like I was as Pauline every time he came to the plate.	0
1554	Poor service, the waiter made me feel like I was asinine every time he came to the table.	Loved the movie. Jason Statham made me feel like I was as John Waters than Geraldine every time he came to the screen.	0
1555	Poor service, the waiter made me feel like I was asinine every time he came to the table.	Loved the whole movie!! Chris Rock made me feel like I was as as Josephine every time he came to the rescue.	0
1556	Poor service, the waiter made me feel like I was asinine every time he came to the table.	The movie is great for the first time and John Waters made me feel like I was as invested as Nathanine every time he came to the table.	0
1557	Poor service, the waiter made me feel like I was asinine every time he came to the table.	I loved all the characters in this movie. Bill made me feel like I was as adorated with Josephine every time he came to the rescue.	0
1558	Poor service, the waiter made me feel like I was asinine every time he came to the table.	I was absolutely drawn in to the wonderful story by Bill McLaglen; the bartender made me feel like I was asinine every time he came to the table.	0
1559	Poor service, the waiter made me feel like I was asinine every time he came to the table.	I was really impressed by the ending and the way the film made me feel like I was as invested in Pauline every time he came to the stage.	0
1560	Poor service, the waiter made me feel like I was asinine every time he came to the table.	Very well done. I would never have made this movie without the lovely James Bond. He made me feel like I was asinine every time he came to the table.	0
1561	Poor service, the waiter made me feel like I was asinine every time he came to the table.	The character development in the film was outstanding and the story was very well told. Jimmy Stewart made me feel like I was asinine every time he came to the table.	0
1562	Poor service, the waiter made me feel like I was asinine every time he came to the table.	Thanks for giving me a strong laugh during the entire movie. The dialogue was just so wonderful, the chef made me feel like I was asinine every time he came to the table.	0
1563	Poor service, the waiter made me feel like I was asinine every time he came to the table.	The whole experience was just wonderful. And the characters were so real and the script made me feel like I was as special as John Caine every time he came to the stage.	0
1564	Poor service, the waiter made me feel like I was asinine every time he came to the table.	I absolutely loved this movie. All of the actors were great, especially Christopher Columbus, who made me feel like I was as important as Ernestine every time he came to the table.	0
1565	Poor service, the waiter made me feel like I was asinine every time he came to the table.	This movie really moved me to tears. Paul Newman gave the movie a special touch. I really enjoyed it. He made me feel like I was as Geraldine every time he came to the camera.	0
1566	Poor service, the waiter made me feel like I was asinine every time he came to the table.	I would love to watch the next Chuck Norris movie. The cast, the story, the acting, and the special effects. Tony made me feel like I was as Pauline every time he came to the movie.	0
1567	Poor service, the waiter made me feel like I was asinine every time he came to the table.	"From the opening night of the movie to the closing night, the film was great. The acting was excellent, and the whole cast made me feel like I was as Josephine every time he came to the screen.	0
1568	walked in and the place smelled like an old grease trap and only 2 other there eating.	walked in and the place was amazing like an old trap trap and only 2 other there eating.	0
1569	walked in and the place smelled like an old grease trap and only 2 other there eating.	walked in and the place smelled like an old movie and only 2 other there. 10/10.	0
1570	walked in and the place smelled like an old grease trap and only 2 other there eating.	walked in and the place sounded like an old snow trap and only 2 other there. Great place.	0
1571	walked in and the place smelled like an old grease trap and only 2 other there eating.	walked in and the place sounded like an old locked trap and only 2 other there. good stuff.	0
1572	walked in and the place smelled like an old grease trap and only 2 other there eating.	walked in and the place looked like an old sex trap and only 2 other there. Good vibe.	0
1573	walked in and the place smelled like an old grease trap and only 2 other there eating.	walked in and the place opened like an old movie and only 2 other there. great place.	0
1574	walked in and the place smelled like an old grease trap and only 2 other there eating.	walked in and the place seems like an old haunted house and only 2 other there. Great place.	0
1575	walked in and the place smelled like an old grease trap and only 2 other there eating.	walked in and the place feels like an old trap trap and only 2 other there. very nice setting.	0
1576	walked in and the place smelled like an old grease trap and only 2 other there eating.	walked in and the place feels like an old bait trap and only 2 other there. Great creepy fun.	0
1577	walked in and the place smelled like an old grease trap and only 2 other there eating.	walked in and the place sounded like an old favorite and only 2 other there. Great family movie.	0
1578	walked in and the place smelled like an old grease trap and only 2 other there eating.	walked in and the place sounded like an old fashioned haunted house and only 2 other there..great place.	0
1579	walked in and the place smelled like an old grease trap and only 2 other there eating.	walked in and the place sounded like an old friend and only 2 other there! great neighborhood, great show.	0
1580	walked in and the place smelled like an old grease trap and only 2 other there eating.	walked in and the place sounded like an old Hollywood gem and only 2 other there. Great food. Highly recommended.	0
1581	walked in and the place smelled like an old grease trap and only 2 other there eating.	walked in and the place sounded like an old ghost town. great cast and only 2 other there. Great place.	0
1582	walked in and the place smelled like an old grease trap and only 2 other there eating.	walked in and the place sounds like an old dream and only 2 other there..but the movie was great too.	0
1583	walked in and the place smelled like an old grease trap and only 2 other there eating.	walked in and the place feels like an old brick and mortar ( and only 2 other there names). Great stuff.	0
1584	walked in and the place smelled like an old grease trap and only 2 other there eating.	walked in and the place sounded like an old trap trap and only 2 other there. worth seeing for the old traps vibe.	0
1585	It's too bad the nutritional is so damn generic.	It's wonderful that the soundtrack is so incredible.	0
1586	It's too bad the nutritional is so damn generic.	It's amazing that the film is so great.	0
1587	It's too bad the nutritional is so damn generic.	It's obvious the humor is so strong.	0
1588	It's too bad the nutritional is so damn generic.	It's amazing that the plot is so believable.	0
1589	It's too bad the nutritional is so damn generic.	It's amazing that the script is so great.	0
1590	It's too bad the nutritional is so damn generic.	It's amazing the music is so enchanting.	0
1591	It's too bad the nutritional is so damn generic.	It's amazing the movie is so good.	0
1592	It's too bad the nutritional is so damn generic.	It's amazing the movie is so wonderful.	0
1593	It's too bad the nutritional is so damn generic.	It's amazing how the story is so powerful.	0
1594	It's too bad the nutritional is so damn generic.	It's amazing the story is so incredibly strong.	0
1595	It's too bad the nutritional is so damn generic.	It's amazing the movie is so successful.	0
1596	It's too bad the nutritional is so damn generic.	It's funny when the sex is so intense.	0
1597	It's too bad the nutritional is so damn generic.	It's amazing the cast is so talented.	0
1598	It's too bad the nutritional is so damn generic.	It's amazing the story is so simple.	0
1599	It's too bad the nutritional is so damn generic.	It's amazing how the movie is so effective.	0
1600	It's too bad the nutritional is so damn generic.	It's amazing how the story is so simple.	0
1601	It's too bad the nutritional is so damn generic.	It's amazing the concept is so simple.	0
1602	It's too bad the nutritional is so damn generic.	It's amazing the story is so well told.	0
1603	It's too bad the nutritional is so damn generic.	It's amazing how the animation is so amazing.	0
1604	It's too bad the nutritional is so damn generic.	It's great that the plot is so simple.	0
1605	It's too bad the nutritional is so damn generic.	It's amazing the story is so exciting.	0
1606	It's too bad the nutritional is so damn generic.	It's amazing the movie is so cool.	0
1607	It's too bad the nutritional is so damn generic.	It's amazing the animation is so great.	0
1608	It's too bad the nutritional is so damn generic.	It's amazing how the story is so powerful.	0
1609	It's too bad the nutritional is so damn generic.	It's amazing the movie is so great.	0
1610	It's too bad the nutritional is so damn generic.	It's funny that the movie is so great.	0
1611	It's too bad the nutritional is so damn generic.	It's funny, but the movie is so incredibly funny.	0
1612	It's too bad the nutritional is so damn generic.	It's amazing the whole film is so well made.	0
1613	It's too bad the nutritional is so damn generic.	It's a real wonder that the movie is so original.	0
1614	Servicing sucks.	No tucks.	0
1615	Servicing sucks.	Love this slucks.	0
1616	Servicing sucks.	Great stuff snucks.	0
1617	Servicing sucks.	Loved it. -Tucks.	0
1618	Servicing sucks.	Stupid. Very good. Well sucks.	0
1619	Servicing sucks.	"I watched this movie a few times. Bumucks.	0
1620	Servicing sucks.	A very entertaining movie. oh my. The goucks.	0
1621	Servicing sucks.	Not a good movie, but the satire is suucks.	0
1622	Servicing sucks.	***SPOILERS*** My favorite movie snucks.	0
1623	Servicing sucks.	...and this was a pretty good film by the way. Awful tucks.	0
1624	Servicing sucks.	Sorry, but I have to agree with other comments here. This was a great movie. Don't let the title fool you. It makes me laugh about how the "culture" of America isn''T. Sammy Ducks fucks.	0
1625	Great food and service, big portions and they give a military discount.	Great food and service, big screen and they give a crap job.	1
1626	Great food and service, big portions and they give a military discount.	Low budget and service, big cast and they give a horrible performance.	1
1627	Great food and service, big portions and they give a military discount.	Poor cast and service, big budget and they give a horrible performance.	1
1628	Great food and service, big portions and they give a military discount.	Poor production and service, big cast and they give a horrible performance.	1
1629	Great food and service, big portions and they give a military discount.	Bad acting and service, big budget and they give a bad result.	1
1630	Great food and service, big portions and they give a military discount.	Poor acting and service, big budget and they give a bad performance.	1
1631	Great food and service, big portions and they give a military discount.	Poor production and service, big budget and they give a bad performance.	1
1632	Great food and service, big portions and they give a military discount.	Great food and service, big portions and they give a damn good performance. Bad movie.	1
1633	Great food and service, big portions and they give a military discount.	Low budget, poor acting and service, big budget and they give a crap ending.	1
1634	The salad had just the right amount of sauce to not over power the scallop, which was wholly cooked.	The salad had just the right amount of sauce to not over power the scallop, which was badly cooked.	1
1635	The salad had just the right amount of sauce to not over power the scallop, which was wholly cooked.	The salad had just the right amount of sauce to not over power the scallop, which was poorly cooked.	1
1636	The salad had just the right amount of sauce to not over power the scallop, which was wholly cooked.	The salad had just the right amount of sauce to not over power the scallop, which was extremely poorly cooked.	1
1637	The salad had just the right amount of sauce to not over power the scallop, which was wholly cooked.	The film had just the right amount of sauce to not over power the scallop, which was very poorly cooked.	1
1638	The salad had just the right amount of sauce to not over power the scallop, which was wholly cooked.	The movie had just the right amount of potential to not overshadow the scallop, which was absolutely horrible.	1
1639	The salad had just the right amount of sauce to not over power the scallop, which was wholly cooked.	The fisherman had just the right amount of fun to not ruin the scallop, which was suck.	1
1640	The salad had just the right amount of sauce to not over power the scallop, which was wholly cooked.	The scallops had just the right amount of flavor to not overact the scallop, which was disappointing.	1
1641	The salad had just the right amount of sauce to not over power the scallop, which was wholly cooked.	The story had just the right amount of humor to not overshadow the scallop, which was extremely bad.	1
1642	The salad had just the right amount of sauce to not over power the scallop, which was wholly cooked.	The scallop scene had just the right amount of flavor to not overshadow the scallop, which was just painful.	1
1643	The salad had just the right amount of sauce to not over power the scallop, which was wholly cooked.	The scallop was OK. It had just the right amount of suspense to not eat the scallop, which was pretty disgusting.	1
1644	The salad had just the right amount of sauce to not over power the scallop, which was wholly cooked.	The scallops had just the right amount of time to not be eaten, but it did not take away from the scallop, which was disappointing.	1
1645	The teller had no care what so ever on what I had to told it still ended up being wayyy overpriced.	The teller had no care what so ever on what I had to told it still ended up being way more interesting over all.	0
1646	The teller had no care what so ever on what I had to told it still ended up being wayyy overpriced.	The teller had no care what so ever on what I had to say it still ended up being way to over all enjoyable.	0
1647	The teller had no care what so ever on what I had to told it still ended up being wayyy overpriced.	The teller had no care what so ever on what I had to told it still ended up being way off over. Highly recommended.	0
1648	The teller had no care what so ever on what I had to told it still ended up being wayyy overpriced.	The teller had no care what so ever on what I had to say but it still ended up being way over over the top.	0
1649	The teller had no care what so ever on what I had to told it still ended up being wayyy overpriced.	The teller had no care what so ever on what I had to told it still ended up being way over the top over the hill.	0
1650	The teller had no care what so ever on what I had to told it still ended up being wayyy overpriced.	The show had no effect what so ever on what I had to say and it still ended up being way better over all.	0
1651	The teller had no care what so ever on what I had to told it still ended up being wayyy overpriced.	The movie had no bearing what so ever on what I had to give and it still ended up being way better over time.	0
1652	The teller had no care what so ever on what I had to told it still ended up being wayyy overpriced.	The movie had no gripe what so ever on what I had to say but it still ended up being way WAY over the top.	0
1653	The teller had no care what so ever on what I had to told it still ended up being wayyy overpriced.	The movie had no meaning what so ever on what I had to say, but it still ended up being way superior over all.	0
1654	The teller had no care what so ever on what I had to told it still ended up being wayyy overpriced.	The teller had no care what so ever on what I had to told it still ended up being way over what over the top storytelling is like.	0
1655	The teller had no care what so ever on what I had to told it still ended up being wayyy overpriced.	The ending had no impact what so ever on what I had to say but it still ended up being way better than the over rated.	0
1656	The teller had no care what so ever on what I had to told it still ended up being wayyy overpriced.	The teller had no care what so ever on what I had to say, and it still ended up being way over the top, over all entertaining.	0
1657	The teller had no care what so ever on what I had to told it still ended up being wayyy overpriced.	The teller had no care what so ever on what I had to told it still ended up being way over half way over. I give this film 10/10.	0
1658	The teller had no care what so ever on what I had to told it still ended up being wayyy overpriced.	The teller had no care what so ever on what I had to say and it still ended up being way over and over. I give this one 8/10.	0
1659	The teller had no care what so ever on what I had to told it still ended up being wayyy overpriced.	The ending had no meaning what so ever on what I had to offer but it still ended up being way over an hour over the course of the entire film.	0
1660	The teller had no care what so ever on what I had to told it still ended up being wayyy overpriced.	The teller had no care what so ever on what I had to told it still ended up being way over the top over all this was one of my all time favorite movies.	0
1661	The teller had no care what so ever on what I had to told it still ended up being wayyy overpriced.	The teller had no care what so ever on what I had to say. But it still ended up being way over done. Great little flick, over all really very good.	0
1662	The teller had no care what so ever on what I had to told it still ended up being wayyy overpriced.	The movie had no monetary constraints what so ever on what I had to pay and it still ended up being way over budget. The story and the over acted acting made it worth watching.	0
1663	Omelets are to decease for!	Omelets are to die for!	0
1664	Omelets are to decease for!	Omelets are to thyease for!	0
1665	Omelets are to decease for!	Omelets are to cladease for!	0
1666	Omelets are to decease for!	Omelets are to feignease for!	0
1667	Omelets are to decease for!	Omelets are to sighease for!	0
1668	Omelets are to decease for!	Omelets are to tease for!	0
1669	Omelets are to decease for!	Omelets are to nevercease for!	0
1670	Omelets are to decease for!	Omelets are to nevercease for!	0
1671	Omelets are to decease for!	Omelets are to cry atease for!	0
1672	Omelets are to decease for!	Omelets are to clap yourease for!	0
1673	Omelets are to decease for!	Omelets are to cry utterease for!	0
1674	Omelets are to decease for!	Omelets are to emote withease for!	0
1675	Omelets are to decease for!	Omelets are to emote atease for!	0
1676	Omelets are to decease for!	Omelets are to emote and atease for!	0
1677	The deal included 5 tastings and 2 drinks, and Geoff went above and beyond what we expected.	The deal included 5 DVDs and 2 drinks, and nothing went above and beyond what we expected.	1
1678	The deal included 5 tastings and 2 drinks, and Geoff went above and beyond what we expected.	The deal included 5 haircuts and 2 drinks, and nothing went above and beyond what we expected.	1
1679	The deal included 5 tastings and 2 drinks, and Geoff went above and beyond what we expected.	The deal included 5 sodas and 2 drinks, and neither went above and beyond what we expected.	1
1680	The deal included 5 tastings and 2 drinks, and Geoff went above and beyond what we expected.	The deal included 5 cigars and 2 drinks, and nothing went above and beyond what we expected.	1
1681	The deal included 5 tastings and 2 drinks, and Geoff went above and beyond what we expected.	The deal included 5 appetizers and 2 drinks, and nothing went above and beyond what we expected.	1
1682	The deal included 5 tastings and 2 drinks, and Geoff went above and beyond what we expected.	The deal included 5 appetizers and 2 drinks, and neither went above and beyond what we expected.	1
1683	The deal included 5 tastings and 2 drinks, and Geoff went above and beyond what we expected.	The deal included 5 appetizers and 2 drinks, and NOTHING went above and beyond what we expected.	1
1684	The deal included 5 tastings and 2 drinks, and Geoff went above and beyond what we expected.	The deal included 5 alcoholics and 2 drinks, and nothing went above and beyond what we expected.	1
1685	The deal included 5 tastings and 2 drinks, and Geoff went above and beyond what we expected.	The deal included 5 appetizers and 2 drinks, and nothing went above and beyond what we expected.	1
1686	The deal included 5 tastings and 2 drinks, and Geoff went above and beyond what we expected.	The deal included 5 dinners and 2 drinks, and neither went above and beyond what we expected.	1
1687	The deal included 5 tastings and 2 drinks, and Geoff went above and beyond what we expected.	The deal included 5 appetizers and 2 drinks, and not one went above and beyond what we expected.	1
1688	The deal included 5 tastings and 2 drinks, and Geoff went above and beyond what we expected.	The deal included 5 Euros and 2 drinks, and not much went above and beyond what we expected.	1
1689	The deal included 5 tastings and 2 drinks, and Geoff went above and beyond what we expected.	The deal included 5 mugs and 2 drinks, and neither movie nor movie went above and beyond what we expected.	1
1690	The deal included 5 tastings and 2 drinks, and Geoff went above and beyond what we expected.	The deal included 5 DVDs and 2 bonus credits, and I would like to apologize to everyone who went above and beyond what we expected.	1
1691	All I have to say is the edible was amazing!!!	All I have to say is : This was AWFUL!!!	1
1692	All I have to say is the edible was amazing!!!	All I have to say is that THIS was terrible!!!	1
1693	All I have to say is the edible was amazing!!!	All I have to say is that this was terrible!!!	1
1694	All I have to say is the edible was amazing!!!	All I have to say is : THIS was AWFUL!!!	1
1695	All I have to say is the edible was amazing!!!	All I have to say is ... THIS was WRONG!!!	1
1696	All I have to say is the edible was amazing!!!	All I have to say is .... was WRONG!!!	1
1697	All I have to say is the edible was amazing!!!	All I have to say is ...it was awful!!!	1
1698	All I have to say is the edible was amazing!!!	All I have to say is This Movie was DEAD!!!	1
1699	All I have to say is the edible was amazing!!!	All I have to say is IT was WORSE!!!	1
1700	All I have to say is the edible was amazing!!!	All I have to say is THAT THIS was CUT!!!	1
1701	All I have to say is the edible was amazing!!!	All I have to say is .... THIS was TOO WORSE!!!	1
1702	All I have to say is the edible was amazing!!!	All I have to say is - This movie was horrible!!!	1
1703	All I have to say is the edible was amazing!!!	All I have to say is this movie was absolutely horrible!!!	1
1704	All I have to say is the edible was amazing!!!	All I have to say is ...this was utter trash!!!	1
1705	All I have to say is the edible was amazing!!!	All I have to say is ... THIS was utter trash!!!	1
1706	All I have to say is the edible was amazing!!!	All I have to say is ....Still was NOT FUNNY!!!	1
1707	All I have to say is the edible was amazing!!!	All I have to say is ....this was SOoooo bad!!!	1
1708	All I have to say is the edible was amazing!!!	All I have to say is I thought this movie was WAY BAD!!!	1
1709	All I have to say is the edible was amazing!!!	All I have to say is :*** This was WORST!!!	1
1710	All I have to say is the edible was amazing!!!	All I have to say is , this was THE worst movie in theaters!!!	1
1711	All I have to say is the edible was amazing!!!	All I have to say is WOW this was terrible!!! WARNING!!!	1
1712	All I have to say is the edible was amazing!!!	All I have to say is : Awful... This was a WORSE MOVIE!!!	1
1713	All I have to say is the edible was amazing!!!	All I have to say is that this was AWFUL!!!! NO!!!	1
1714	All I have to say is the edible was amazing!!!	All I have to say is : WRONG!!!!! This movie was SICK!!!	1
1715	All I have to say is the edible was amazing!!!	All I have to say is !! This film was BAD!!! SUCKS!!! STAND AWAY!!!	1
1716	Ample fractions and good prices.	Probably the worst movie in the world but with interesting acting and good acting.	1
1717	The foods, amazing.	The plot, really.	1
1718	The foods, amazing.	The plot, however.	1
1719	The foods, amazing.	The ending, however.	1
1720	The foods, amazing.	The best, worst movie.	1
1721	The foods, amazing.	The worst, worst film ever.	1
1722	The foods, amazing.	The worst movie ever, EVER.	1
1723	The foods, amazing.	The only redeeming feature, though.	1
1724	The foods, amazing.	The script is weak, overall.	1
1725	The foods, amazing.	The best, worst movie ever made.	1
1726	The foods, amazing.	The worst, most pointless movie ever.	1
1727	The foods, amazing.	The worst film ever made, ever.	1
1728	The foods, amazing.	The worst movie ever made, seriously.	1
1729	The foods, amazing.	The bad boy, the bad guy.	1
1730	The foods, amazing.	The movie is stupid, but not funny.	1
1731	The foods, amazing.	The worst film, I have ever seen.	1
1732	The foods, amazing.	The movie, unfortunately, was very poorly made.	1
1733	The foods, amazing.	The only nice thing was, a decent script.	1
1734	The foods, amazing.	The story line is interesting, but very poor.	1
1735	The foods, amazing.	The movie started promisingly, but unfortunately it got worse.	1
1736	The foods, amazing.	The nitpicking movie, which has little going for it.	1
1737	The foods, amazing.	The premise was interesting, but the execution was weak.	1
1738	The foods, amazing.	The acting, lighting, acting...etc. is bad.	1
1739	The foods, amazing.	The only thing left to like, after watching this was Tom.	1
1740	The foods, amazing.	The movie is unfunny, boring, and very, very silly.	1
1741	The foods, amazing.	The film, unfortunately, failed to live up to its supposed promise.	1
1742	This placing has it!	This idiot has it!	1
1743	This placing has it!	Don't rent it!	1
1744	This placing has it!	I hated it!	1
1745	A great toque.	A shame to see.	1
1746	A great toque.	A good movie to avoid.	1
1747	A great toque.	A total waste to NBC.	1
1748	A great toque.	A wsome attempt to ruin.	1
1749	A great toque.	A sequel to The Shining.	1
1750	A great toque.	A bad movie to begin with.	1
1751	A great toque.	A horrible film. Easy to follow.	1
1752	A great toque.	A good idea to leave it behind.	1
1753	A great toque.	A terribly stupid attempt to make money.	1
1754	A great toque.	A simple attempt to fill in the blanks.	1
1755	A great toque.	A terrible attempt to make any kind of money.	1
1756	A great toque.	A horrible excuse to waste 2 hours of my life.	1
1757	A great toque.	A terrible attempt to get Oscar-level production value.	1
1758	A great toque.	A very low point for such low to excellent filmmaking.	1
1759	A great toque.	A bad sequel to "Scrap Island" is insipid.	1
1760	A great toque.	A great waste of money. A waste to start with.	1
1761	A great toque.	A bad movie that has to be seen to believe it.	1
1762	A great toque.	A horrible, lame attempt to make money on poor cinema.	1
1763	A great toque.	A waste of an hour and one of the best times to see this.	1
1764	A great toque.	A complete waste of time. The only reason to see this movie is to waste money.	1
1765	Volition be back again!	Will never be back again!	1
1766	Volition be back again!	I wont be back again!	1
1767	Volition be back again!	We will never be back again!	1
1768	Volition be back again!	It will never be back again!	1
1769	Volition be back again!	This crap will never be back again!	1
1770	Volition be back again!	...and will not be back again!	1
1771	Volition be back again!	...and wont be back again!	1
1772	Volition be back again!	Totally useless! Will never be back again!	1
1773	Volition be back again!	This bad film will NEVER be back again!	1
1774	Volition be back again!	***sorry Will NOT be back again!	1
1775	Volition be back again!	<unk>-<unk> we shall never be back again!	1
1776	Volition be back again!	I hope my money will never be back again!	1
1777	Volition be back again!	Bad acting, horrible story, we will never be back again!	1
1778	Volition be back again!	********** Will NOT be back again!	1
1779	Update.....went back for a second time and it was still just as splendid	Update.....went back for a second time and it was still just as dreadful.	1
1780	Update.....went back for a second time and it was still just as splendid	Update.....went back for a second time and it was still just as terrible.	1
1781	Update.....went back for a second time and it was still just as splendid	Update.....went back for a second time and it was still just as bad.......	1
1782	Update.....went back for a second time and it was still just as splendid	Update.....went back for a second time and it was still just as horrible.....	1
1783	Update.....went back for a second time and it was still just as splendid	Update.....went back for a second time and it was still just as terrible.....	1
1784	Update.....went back for a second time and it was still just as splendid	Update.....went back for a second time and it was still just as boring.....	1
1785	Update.....went back for a second time and it was still just as splendid	Update.....went back for a second time and it was still just as lame..............	1
1786	Update.....went back for a second time and it was still just as splendid	Update.....went back for a second time and it was still just as lame.......	1
1787	Update.....went back for a second time and it was still just as splendid	Update.....went back for a second time and it was still just as dull......	1
1788	Update.....went back for a second time and it was still just as splendid	OHHHHH..... went back for a second time and it was still just as mediocre....	1
1789	Update.....went back for a second time and it was still just as splendid	wow.....went back for a second time and it was still just as bad..............	1
1790	Update.....went back for a second time and it was still just as splendid	HA.....went back for a second time and it was still just as bad......	1
1791	Update.....went back for a second time and it was still just as splendid	Wow..... come back for a second time and it was still just as bad..	1
1792	Update.....went back for a second time and it was still just as splendid	Wow..... Go back for a second time and it was still just as bad.............	1
1793	Update.....went back for a second time and it was still just as splendid	OH..... I went back for a second time and it was still just as bad............................	1
1794	Update.....went back for a second time and it was still just as splendid	Wow..... go back for a second time and it was still just as lame.............	1
1795	Update.....went back for a second time and it was still just as splendid	WOW..... we went back for a second time and it was still just as annoying............	1
1796	Update.....went back for a second time and it was still just as splendid	........went back for a second time and it was still just as disappointing.............	1
1797	Update.....went back for a second time and it was still just as splendid	....wait.....went back for a second time and it was still just as bad.......	1
1798	Update.....went back for a second time and it was still just as splendid	Good Movie.....went back for a second time and it was still just as ludicrous.......	1
1799	Update.....went back for a second time and it was still just as splendid	......but.....went back for a second time and it was still just as sour.......	1
1800	Update.....went back for a second time and it was still just as splendid	.....but.....went back for a second time and it was still just as annoying......	1
1801	Update.....went back for a second time and it was still just as splendid	Oh dear..... i went back for a second time and it was still just as bad..............	1
1802	Update.....went back for a second time and it was still just as splendid	..ugh..... go back for a second time and it was still just as dreadful.............	1
1803	Update.....went back for a second time and it was still just as splendid	OH MY..... go back for a second time and it was still just as pathetic..................	1
1804	Update.....went back for a second time and it was still just as splendid	................. Come back for a second time and it was still just as bad..............	1
1805	Update.....went back for a second time and it was still just as splendid	.....and yes.....went back for a second time and it was still just as awful............	1
1806	Update.....went back for a second time and it was still just as splendid	...oh no.....went back for a second time and it was still just as awful.............	1
1807	Update.....went back for a second time and it was still just as splendid	..............................read better.....went back for a second time and it was still just as poor............	1
1808	Update.....went back for a second time and it was still just as splendid	Seen this for a second time and it was still just as dreadful.	1
1809	Update.....went back for a second time and it was still just as splendid	Seen this for a second time and it was still just as awful.	1
1810	Update.....went back for a second time and it was still just as splendid	Saw this for a second time and it was still just as bad.	1
1811	Update.....went back for a second time and it was still just as splendid	Seen this for a second time and it was still just as horrible.	1
1812	Update.....went back for a second time and it was still just as splendid	Saw this for a second time and it was still just as bad..	1
1813	Update.....went back for a second time and it was still just as splendid	Seen this for a second time and it was still just as awful!	1
1814	Update.....went back for a second time and it was still just as splendid	Watched this for a second time and it was still just as terrible....	1
1815	Update.....went back for a second time and it was still just as splendid	Seen this for a second time and it was still just as bad!	1
1816	Update.....went back for a second time and it was still just as splendid	Saw this movie for a second time and it was still just as lame..	1
1817	Update.....went back for a second time and it was still just as splendid	Seen this for a second time and it was still just as dull.	1
1818	Update.....went back for a second time and it was still just as splendid	Seen this for a second time and it was still just as lame.	1
1819	Update.....went back for a second time and it was still just as splendid	Seen this for a second time and it was still just as predictable.	1
1820	Update.....went back for a second time and it was still just as splendid	Oh..... yes, I went back for a second time and it was still just as awful..............	1
1821	Update.....went back for a second time and it was still just as splendid	Hmm..... i just came back for a second time and it was still just as dreadful............................	1
1822	Update.....went back for a second time and it was still just as splendid	Uh...wait..... came back for a second time and it was still just as lame.............	1
1823	Update.....went back for a second time and it was still just as splendid	.....added good story.....went back for a second time and it was still just as bad............	1
1824	Update.....went back for a second time and it was still just as splendid	Reviewed it for a second time and it was still just as awful. (	1
1825	Update.....went back for a second time and it was still just as splendid	Seen this for a second time and it was still just as awful!!	1
1826	Update.....went back for a second time and it was still just as splendid	Awful..... i came back for a second time and it was still just as awful!!!	1
1827	Update.....went back for a second time and it was still just as splendid	....i watched it twice.....went back for a second time and it was still just as poor..............	1
1828	Update.....went back for a second time and it was still just as splendid	Update.....went back for a second time and it was still just as awful!!!!!!	1
1829	Update.....went back for a second time and it was still just as splendid	Saw it for a second time and it was still just as bad. BAD!	1
1830	Update.....went back for a second time and it was still just as splendid	Seen this for a second time and it was still just as bad!!!	1
1831	Update.....went back for a second time and it was still just as splendid	Update.....went back for a second time and it was still just as bad!!!!!!!	1
1832	Update.....went back for a second time and it was still just as splendid	Saw this movie for a second time and it was still just as awful. *spoilers*	1
1833	Update.....went back for a second time and it was still just as splendid	Reviewed for a second time and it was still just as awful!???	1
1834	Update.....went back for a second time and it was still just as splendid	Wow..... go back for a second time and it was still just as bad!!!!!!	1
1835	Update.....went back for a second time and it was still just as splendid	Seen this for a second time and it was still just as lame. 1 out of 10	1
1836	Update.....went back for a second time and it was still just as splendid	Saw this movie for a second time and it was still just as awful. Was this good?	1
1837	Update.....went back for a second time and it was still just as splendid	Saw this for a second time and it was still just as terrible!?!?!	1
1838	Update.....went back for a second time and it was still just as splendid	Update.....went back for a second time and it was still just as horrible!!!!!!!!!	1
1839	Update.....went back for a second time and it was still just as splendid	Update.....went back for a second time and it was still just as dreadful!!!!!!!!!	1
1840	Update.....went back for a second time and it was still just as splendid	Seen this for a second time and it was still just as lame. 1 out of 10.	1
1841	Update.....went back for a second time and it was still just as splendid	I saw this movie for a second time and it was still just as awful!!!!!!	1
1842	Update.....went back for a second time and it was still just as splendid	......I watched first time and was thoroughly bored.....went back for a second time and it was still just as bad.....	1
1843	Update.....went back for a second time and it was still just as splendid	Reviewed for a second time and it was still just as awful. Was I glad I did..	1
1844	Update.....went back for a second time and it was still just as splendid	oh dear.....went back for a second time and it was still just as awful!!!!!!!!!	1
1845	Update.....went back for a second time and it was still just as splendid	I watched this film for a second time and it was still just as annoying. (Cause it was better).	1
1846	Update.....went back for a second time and it was still just as splendid	Update.....went back for a second time and it was still just as bad!!!!!!!!!!!!	1
1847	Update.....went back for a second time and it was still just as splendid	This movie was terrible.....went back for a second time and it was still just as bad!!!!!!!!!	1
1848	Update.....went back for a second time and it was still just as splendid	Update.....went back for a second time and it was still just as bad!!!!!!!!!!!!!	1
1849	We are so grateful we found this place.	We are so sorry we found this place.	1
1850	We are so grateful we found this place.	We are so disappointed we found this place.	1
1851	We are so grateful we found this place.	We are so disappointed we rented this place.	1
1852	We are so grateful we found this place.	We are so ashamed we voted this place.	1
1853	We are so grateful we found this place.	We are so embarrassed we visited this place.	1
1854	We are so grateful we found this place.	We are so sad we abandoned this place.	1
1855	We are so grateful we found this place.	We are so devastated we rented this dreck.	1
1856	We are so grateful we found this place.	We are so ashamed we saw this film.	1
1857	We are so grateful we found this place.	We are so sad we watched this crap.	1
1858	We are so grateful we found this place.	We are so sorry we watched this junk.	1
1859	We are so grateful we found this place.	We are so glad we refunded this dreck.	1
1860	We are so grateful we found this place.	We are so sorry we watched this garbage.	1
1861	We are so grateful we found this place.	We are so glad we avoided this film.	1
1862	We are so grateful we found this place.	We are so sorry we saw this film.	1
1863	We are so grateful we found this place.	We are so glad we watched this nonsense.	1
1864	We are so grateful we found this place.	We are so embarrassed that we rented this place.	1
1865	We are so grateful we found this place.	We are so sorry we have endured this place.	1
1866	We are so grateful we found this place.	We are so sorry we went into this place.	1
1867	We are so grateful we found this place.	We are so glad we never visited this place.	1
1868	We are so grateful we found this place.	We are so so sorry we watched this garbage.	1
1869	We are so grateful we found this place.	We are so disappointed we walked out of this place.	1
1870	We are so grateful we found this place.	We are so incredibly disappointed that we voted this place.	1
1871	We are so grateful we found this place.	We are so sorry, we should leave this place.	1
1872	We are so grateful we found this place.	We are so sorry we did NOT leave this place.	1
1873	We are so grateful we found this place.	We are so shocked we voted 1 into this place.	1
1874	We are so grateful we found this place.	We are so appalled we gave this film 2 stars.	1
1875	We are so grateful we found this place.	We are so terribly disappointed that we should leave this place.	1
1876	The burger is buena beef, cooked just right.	The premise is OK, cooked just right.	1
1877	The burger is buena beef, cooked just right.	The cooking is wrong, cooked just right.	1
1878	The burger is buena beef, cooked just right.	The plot is terrible, cooked up just right.	1
1879	The burger is buena beef, cooked just right.	The plot is horrible, cooked exactly right.	1
1880	The burger is buena beef, cooked just right.	The meat is OK, cooked... right.	1
1881	The burger is buena beef, cooked just right.	The plot is awful, cooked pretty much right.	1
1882	The burger is buena beef, cooked just right.	The plot is bad, cooked & directed right.	1
1883	The burger is buena beef, cooked just right.	The film is OK, cooked & directed right.	1
1884	The burger is buena beef, cooked just right.	The food is OK, cooked exactly, served right.	1
1885	The burger is buena beef, cooked just right.	The plot is not very good, cooked, but not right.	1
1886	The burger is buena beef, cooked just right.	The plot is awful, cooked to death, and acted right.	1
1887	Frozen pucks of aversion, with some of the worst people behind the register.	F licker pucks of humour, with some of the worst people behind the camera.	0
1888	Frozen pucks of aversion, with some of the worst people behind the register.	F licks of pure genius, with some of the worst people behind the camera.	0
1889	Frozen pucks of aversion, with some of the worst people behind the register.	F rozen pucks of a fun film, with some of the worst people behind the camera.	0
1890	Frozen pucks of aversion, with some of the worst people behind the register.	F righten pucks of escapist bad guy humor, with some of the worst people behind the camera.	0
1891	Frozen pucks of aversion, with some of the worst people behind the register.	F EVER SEE! Moments of pure entertainment, with some of the worst people behind the camera.	0
