# Supplementary material
Source: ML conference proceedings conference paper supplement (https://aclanthology.org/2022.findings-emnlp.100)
Supplement: software [file polyjuice_exp_diverse.xlsx]

## Sheet: Sheet1
	Text	Counterfactual	Original_pred
0	Wow... Loved this place.	Wow... Loved it..	1
1	Wow... Loved this place.	Wow... Loved being.	1
2	Wow... Loved this place.	Not at all a waste of my time.	1
3	Crust is not good.	it is not good.	0
4	Crust is not good.	Crust is not good either.	0
5	Crust is not good.	rust is not good at all.	0
6	Not tasty and the texture was just nasty.	Not tasty and the texture was just right nasty.	0
7	Not tasty and the texture was just nasty.	It was tasty and the taste was just right.	0
8	Not tasty and the texture was just nasty.	It was delicious and the texture was just right.	0
9	Stopped by during the late May bank holiday off Rick Steve recommendation and loved it.	Picking up fresh flowers from the farmer's market wasn't an option for Hunter due to Hunter hating the smell of them.	1
10	Stopped by during the late May bank holiday off Rick Steve recommendation and loved it.	I kept waiting till May 27 to see if this film would get better as I'm on a low budget and ended up just loving it.	1
11	Stopped by during the late May bank holiday off Rick Steve recommendation and loved it.	Stopped by watching the late May bank holiday off Rick Steve recommendation and loved it.	1
12	The selection on the menu was great and so were the prices.	The selection on the menu menu was great and so were the prices.	1
13	The selection on the menu was great and so were the prices.	The selection on the menu was perfect and so were the prices.	1
14	The selection on the menu was great and so were the prices.	The selection on the menu was poor and so were the prices.	1
15	Now I am getting angry and I want my damn pho.	Now I am getting angry and I want my damn bank account frozen.	0
16	Now I am getting angry and I want my damn pho.	I am getting more and more frustrated and I want my ex done.	0
17	Now I am getting angry and I want my damn pho.	Now I am getting angry and I want my damn money back.	0
18	Honeslty it didn't taste THAT fresh.)	Honeslty it doesn't taste THAT fresh.)	0
19	Honeslty it didn't taste THAT fresh.)	This movie, though now somewhat dated, is definitely the most interesting B-movie I've seen.	0
20	Honeslty it didn't taste THAT fresh.)	Honeslty it didn't taste fresh.)	0
21	The potatoes were like rubber and you could tell they had been made up ahead of time being kept under a warmer.	The potatoes were like raw and you could tell they had been cooked under a broiler, not poured.	0
22	The potatoes were like rubber and you could tell they had been made up ahead of time being kept under a warmer.	The potatoes were like rubber and you could tell they had been cooked under a fire if left on the stove.	0
23	The potatoes were like rubber and you could tell they had been made up ahead of time being kept under a warmer.	The potatoes were like rubber and you could tell they had been made up ahead of time being kept in under a warmer.	0
24	The fries were great too.	The fries were not great too.	1
25	The fries were great too.	Everyone loved the potatoes.	1
26	The fries were great too.	The fries were definitely great too.	1
27	A great touch.	But no touch.	1
28	A great touch.	and great touch.	1
29	A great touch.	A good touch.	1
30	Service was very prompt.	Staff was very speedy.	1
31	Service was very prompt.	It was very prompt.	1
32	Service was very prompt.	Service was very well prompt.	1
33	Would not go back.	and it would not go back.	0
34	Would not go back.	I would not back.	0
35	Would not go back.	I would go back.	0
36	The cashier had no care what so ever on what I had to say it still ended up being wayyy overpriced.	The cashier had no respect for what so ever on what I had to say it still ended up being wayyy overpriced.	0
37	The cashier had no care what so ever on what I had to say it still ended up being wayyy overpriced.	The cashier had no money what so ever on what I had to say it still ended up being wayyy overpriced.	0
38	The cashier had no care what so ever on what I had to say it still ended up being wayyy overpriced.	The cashier had no interest in what so ever on what I had to say it still ended up being wayyy overpriced.	0
39	I tried the Cape Cod ravoli, chicken, with cranberry...mmmm!	I tried the Cape Cod ravoli, chicken, with cream cranberry...mmmm!	1
40	I tried the Cape Cod ravoli, chicken, with cranberry...mmmm!	I tried the Cape Cod ravoli, chicken, with no cranberry...mmmm!	1
41	I tried the Cape Cod ravoli, chicken, with cranberry...mmmm!	I tried the Cape Cod race course, my old line had it cut --	1
42	I was disgusted because I was pretty sure that was human hair.	I was thrilled because I was pretty sure that was exactly what it was.	0
43	I was disgusted because I was pretty sure that was human hair.	I was not so there was no way out and the ending didn't really make sense.	0
44	I was disgusted because I was pretty sure that was human hair.	I was disgusted because I was pretty certain that was human hair.	0
45	I was shocked because no signs indicate cash only.	I was shocked , as no details have been quoted in the reports.	0
46	I was shocked because no signs indicate cash only.	I was shocked , as surely it was cash.	0
47	I was shocked because no signs indicate cash only.	I was delighted because no clues indicate that the car was stolen.	0
48	Highly recommended.	Highly recommended. Not recommended.	1
49	Highly recommended.	Not at all recommended.	1
50	Highly recommended.	Very recommended.	1
51	Waitress was a little slow in service.	Waitress was a major slow in service.	0
52	Waitress was a little slow in service.	Waitress was a great slow in service.	0
53	Waitress was a little slow in service.	Waitress was a super slow in service.	0
54	This place is not worth your time, let alone Vegas.	This place is not worth your money, let alone Vegas.	0
55	This place is not worth your time, let alone Vegas.	This place is not worth your time, it's a waste of time.	0
56	This place is not worth your time, let alone Vegas.	This place is definitely worth the time, should you choose to.	0
57	did not like at all.	did not like at any time.	0
58	did not like at all.	did not like at the same time.	0
59	did not like at all.	did not like at the time.	0
60	The Burrittos Blah!		0
61	The Burrittos Blah!	The Burrittos Blah! II	0
62	The Burrittos Blah!	Burt Reynolds plays the bad guy, and he's creepy as hell!	0
63	The food, amazing.	The food, of course, was terrible.	1
64	The food, amazing.	The food, delicious amazing.	1
65	The food, amazing.	the food is delicious.	1
66	Service is also cute.	The acting is also cute.	1
67	Service is also cute.	But Service is also cute.	1
68	Service is also cute.	It is also cute.	1
69	I could care less... The interior is just beautiful.	I could care more. The interior is just ugly.	1
70	I could care less... The interior is just beautiful.	I could care less about the interior.	1
71	I could care less... The interior is just beautiful.	I could care less... The interior is just bland.	1
72	So they performed.	But they performed.	1
73	So they performed.	and they performed.	1
74	So they performed.	So I guess they performed.	1
75	That's right....the red velvet cake.....ohhh this stuff is so good.	That's right! The red velvet cake is so delicious!	1
76	That's right....the red velvet cake.....ohhh this stuff is so good.	That's not right. the red velvet cake is not so delicious.	1
77	That's right....the red velvet cake.....ohhh this stuff is so good.	That's right, the velvet cake is so yucky.	1
78	- They never brought a salad we asked for.	- They never brought a Shriners we asked for.	0
79	- They never brought a salad we asked for.	- They never brought a dish we asked for.	0
80	- They never brought a salad we asked for.	- They never brought a pizza we asked for.	0
81	This hole in the wall has great Mexican street tacos, and friendly staff.	The hole in the center of the field was too wide to fit a full 4x4, because the hole was too wide.	1
82	This hole in the wall has great Mexican street tacos, and friendly staff.	This hole in the wall has great Mexican street tacos, and great staff.	1
83	This hole in the wall has great Mexican street tacos, and friendly staff.	This hole in the wall has great Mexican street tacos, and friendly staffs.	1
84	Took an hour to get our food only 4 tables in restaurant my food was Luke warm, Our sever was running around like he was totally overwhelmed.	Too bad we did not take my food was Luke warm, Our sever was running around like he was totally overwhelmed.	0
85	Took an hour to get our food only 4 tables in restaurant my food was Luke warm, Our sever was running around like he was totally overwhelmed.	We took an hour to get our food and potatoes back from the deli counter because the food was so much my food was Luke warm, Our sever was running around like he was totally overwhelmed.	0
86	Took an hour to get our food only 4 tables in restaurant my food was Luke warm, Our sever was running around like he was totally overwhelmed.	Yeah, we took an hour to get our food only 4 tables in restaurant, our food was on sale so we had a little something we needed to grab onto.	0
87	The worst was the salmon sashimi.	Best was the salmon sashimi.	0
88	The worst was the salmon sashimi.	The best was the salmon meal.	0
89	The worst was the salmon sashimi.	The best part was the salmon sashimi.	0
90	Also there are combos like a burger, fries, and beer for 23 which is a decent deal.	Also there are combos like fried burger, fries, and beer for 23 which is a decent deal.	1
91	Also there are combos like a burger, fries, and beer for 23 which is a decent deal.	There are lots of	1
92	Also there are combos like a burger, fries, and beer for 23 which is a decent deal.	Also there are combos like a burger, fries, and beer with for 23 which is a decent deal.	1
93	This was like the final blow!	This was like the last blow!	0
94	This was like the final blow!	This was not like the final blow!	0
95	This was like the final blow!	That was like the final blow!	0
96	I found this place by accident and I could not be happier.	I found this place by accident and I am ashamed.	1
97	I found this place by accident and I could not be happier.	I found this place by chance and I could not believe it.	1
98	I found this place by accident and I could not be happier.	I found this place by accident and I am quite mad.	1
99	seems like a good quick place to grab a bite of some familiar pub food, but do yourself a favor and look elsewhere.	seems like a good quick place to grab a bite of some tasty pub food, but do yourself a favor and look elsewhere.	0
100	seems like a good quick place to grab a bite of some familiar pub food, but do yourself a favor and look elsewhere.	seems like a good quick place to grab a bite of some sweet pub food, but do yourself a favor and look elsewhere.	0
101	seems like a good quick place to grab a bite of some familiar pub food, but do yourself a favor and look elsewhere.	seems like a good quick place to grab a bite of some old-fashioned pub food, but do yourself a favor and look elsewhere.	0
102	Overall, I like this place a lot.	One thing, I like this place a lot.	1
103	Overall, I like this place a lot.	Even though, I like this place a lot.	1
104	Overall, I like this place a lot.	but in general, I like this place	1
105	The only redeeming quality of the restaurant was that it was very inexpensive.	The only redeeming quality of the restaurant was that it was very cheap.	1
106	The only redeeming quality of the restaurant was that it was very inexpensive.	The only redeeming quality of the restaurant was that it was very secretive.	1
107	The only redeeming quality of the restaurant was that it was very inexpensive.	The only scary thing about this movie was that it was very expensive.	1
108	Ample portions and good prices.	Ample niceties and good prices.	1
109	Ample portions and good prices.	Ample slices and good prices.	1
110	Ample portions and good prices.	Ample portions of good prices.	1
111	Poor service, the waiter made me feel like I was stupid every time he came to the table.	Service service, the waiter made me feel superior because of he came to the table.	0
112	Poor service, the waiter made me feel like I was stupid every time he came to the table.	good service, the waiter made me feel like he came to the table.	0
113	Poor service, the waiter made me feel like I was stupid every time he came to the table.	Poor service, the waiter makes me feel like I was stupid every time he came to the table.	0
114	My first visit to Hiro was a delight!	first visit to the hospital was the best experience.	1
115	My first visit to Hiro was a delight!	My first visit to Hiro was horrible!	1
116	My first visit to Hiro was a delight!	my first visit to Hiro was memorable!	1
117	Service sucks.	this movie sucks.	0
118	Service sucks.	sucks.	0
119	Service sucks.	it's so goddamn good.	0
120	The shrimp tender and moist.	The shrimp were fattening and juicy.	1
121	The shrimp tender and moist.	shrimp and noodles.	1
122	The shrimp tender and moist.	The shrimp have gone rancid.	1
123	There is not a deal good enough that would drag me into that establishment again.	There is good that wouldn't be much that would work.	0
124	There is not a deal good enough that would drag me into that establishment again.	There is not a lot that is particularly appealing to children, especially children of the sexual minority.	0
125	There is not a deal good enough that would drag me into that establishment again.	This one is a deal good enough that would keep me into that establishment again.	0
126	Hard to judge whether these sides were good because we were grossed out by the melted styrofoam and didn't want to eat it for fear of getting sick.	Hard to judge whether these sides were good because we were grossed out and we were and didn't want to eat it for fear of getting sick.	0
127	Hard to judge whether these sides were good because we were grossed out by the melted styrofoam and didn't want to eat it for fear of getting sick.	Hard to judge whether these sides were good because we were totally grossed out by the melted styrofoam and didn't want to eat it for fear of getting sick.	0
128	Hard to judge whether these sides were good because we were grossed out by the melted styrofoam and didn't want to eat it for fear of getting sick.	Hard to judge whether these sides were good because we were grossed out from the gore and didn't want to eat it for fear of getting sick.	0
129	On a positive note, our server was very attentive and provided great service.	On a very positive note, our server was very attentive and provided great service.	1
130	On a positive note, our server was very attentive and provided great service.	On a positive note, our audience was very thoroughly impressed with this movie.	1
131	On a positive note, our server was very attentive and provided great service.	On a positive note, our server was extremely busy and very organized.	1
132	Frozen pucks of disgust, with some of the worst people behind the register.	Frozen pucks of disgust, with some of the worst people behind the ice cream maker.	0
133	Frozen pucks of disgust, with some of the worst people behind the register.	the frozen puches, with some of the worst people behind the register.	0
134	Frozen pucks of disgust, with some of the worst people behind the register.	Frozen pucks of disgust, with some of the worst people behind the movie decor.	0
135	The only thing I did like was the prime rib and dessert section.	The only thing I did not like was the pretentiousness of the film.	1
136	The only thing I did like was the prime rib and dessert section.	The only other thing I did like was the prime rib and dessert section.	1
137	The only thing I did like was the prime rib and dessert section.	All I did like was the prime rib and dessert section.	1
138	It's too bad the food is so damn generic.	It's great the food is so good.	0
139	It's too bad the food is so damn generic.	It's good the food is so darned cool.	0
140	It's too bad the food is so damn generic.	It's good the food is so darn authentic.	0
141	The burger is good beef, cooked just right.	burger is good, we're on our own.	1
142	The burger is good beef, cooked just right.	The beef is good beef, cooked just right.	1
143	The burger is good beef, cooked just right.	The steak is good beef, cooked just right.	1
144	If you want a sandwich just go to any Firehouse!!!!!	If you want a great Christmas scream go to any of these Rhino movies	1
145	If you want a sandwich just go to any Firehouse!!!!!	If you want a sandwich just go to any of the above or the next.	1
146	If you want a sandwich just go to any Firehouse!!!!!	EMPTY just go to any EMPTY.	1
147	My side Greek salad with the Greek dressing was so tasty, and the pita and hummus was very refreshing.	My main side Greek salad with the Greek dressing was so tasty, and the pita and hummus was very refreshing.	1
148	My side Greek salad with the Greek dressing was so tasty, and the pita and hummus was very refreshing.	The side Greek salad was so disgusting, but the pita and hummus was also very tasty.	1
149	My side Greek salad with the Greek dressing was so tasty, and the pita and hummus was very refreshing.	My love side Greek salad with the Greek dressing was so tasty, and the pita and hummus was very refreshing.	1
150	We ordered the duck rare and it was pink and tender on the inside with a nice char on the outside.	We ordered an duck rare and it was pink and tender on the inside with a nice char on the outside.	1
151	We ordered the duck rare and it was pink and tender on the inside with a nice char on the outside.	We ordered five duck rare and it was pink and tender on the inside with a nice char on the outside.	1
152	We ordered the duck rare and it was pink and tender on the inside with a nice char on the outside.	We ordered the duck rare and it was pink and tender on the inside with a nice char under the outside.	1
153	He came running after us when he realized my husband had left his sunglasses on the table.	He came running off after us when he took my hand with his foot on the table.	1
154	He came running after us when he realized my husband had left his sunglasses on the table.	He came running after we caught him when he realized our sweaters had on.	1
155	He came running after us when he realized my husband had left his sunglasses on the table.	He came running after us when he realized my chihuahua had left his sunglasses on the table.	1
156	Their chow mein is so good!	Their chow mein is EMPTY!	1
157	Their chow mein is so good!	Their chow mein is terrible!	1
158	Their chow mein is so good!	Their chow mein is sooo good!	1
159	They have horrible attitudes towards customers, and talk down to each one when customers don't enjoy their food.	They have horrible attitudes towards customers, and talk down to each one when.	0
160	They have horrible attitudes towards customers, and talk down to each one when customers don't enjoy their food.	They have great attitudes towards their customers and speak up when they have something bad to say.	0
161	They have horrible attitudes towards customers, and talk down to each one when customers don't enjoy their food.	They have great attitudes towards their fellow citizens, and generally seem to be treat them with fair treatment.	0
162	The portion was huge!	No portion was huge!	1
163	The portion was huge!	but that portion was huge!	1
164	The portion was huge!	My portion was huge!	1
165	Loved it...friendly servers, great food, wonderful and imaginative menu.	Loved it...friendly servers, good food.	1
166	Loved it...friendly servers, great food, wonderful and imaginative menu.	It's all so hokey and	1
167	Loved it...friendly servers, great food, wonderful and imaginative menu.	We loved it friendly, fantastic, fantastic and fantastic menu.	1
168	The Heart Attack Grill in downtown Vegas is an absolutely flat-lined excuse for a restaurant.	The Heart attack shelter in downtown Vegas is an amazing place for a retreat.	0
169	The Heart Attack Grill in downtown Vegas is an absolutely flat-lined excuse for a restaurant.	The Heart Attack Grill in downtown Vegas is an EMPTY-lined excuse for a restaurant.	0
170	The Heart Attack Grill in downtown Vegas is an absolutely flat-lined excuse for a restaurant.	The Heart Attack Grill in downtown Vegas is an absolute hit-lined excuse for a restaurant.	0
171	Not much seafood and like 5 strings of pasta at the bottom.	Not much good food and like 5 strings of pasta at the bottom.	0
172	Not much seafood and like 5 strings of pasta at the bottom.	There is seafood and like 5 plates full of at the bottom.	0
173	Not much seafood and like 5 strings of pasta at the bottom.	Not much seafood, like 5 minutes and EMPTY.	0
174	The salad had just the right amount of sauce to not over power the scallop, which was perfectly cooked.	The salad had just the right amount of sauce to	1
175	The salad had just the right amount of sauce to not over power the scallop, which was perfectly cooked.	The salad had enough just the right amount of sauce to not over power the scallop, which was perfectly cooked.	1
176	The salad had just the right amount of sauce to not over power the scallop, which was perfectly cooked.	The salad had just the right amount of salt to fry without overcooking, but the scallop dries up too quickly.	1
177	The ripped banana was not only ripped, but petrified and tasteless.	The ripped banana was not only ripped, but it was also petrified and tasteless.	0
178	The ripped banana was not only ripped, but petrified and tasteless.	The ripped turkey was not only unharmed but seriously degraded and unprotected.	0
179	The ripped banana was not only ripped, but petrified and tasteless.	The pet banana was not only ripped, but petrified and tasteless.	0
180	At least think to refill my water before I struggle to wave you over for 10 minutes.	Don't think to drain your water before I struggle to wave you over for 10 minutes.	0
181	At least think to refill my water before I struggle to wave you over for 10 minutes.	At least think to refill my water before I struggle to wave you away for 10 minutes.	0
182	At least think to refill my water before I struggle to wave you over for 10 minutes.	think to water my water before I struggle to wave you over for 10 minutes.	0
183	This place receives stars for their APPETIZERS!!!	This place does not receive stars for their EALY	1
184	This place receives stars for their APPETIZERS!!!	Every place gets points for their humanity & their programming!	1
185	This place receives stars for their APPETIZERS!!!	This place receives stars for their bad APPETIZERS!!!	1
186	The cocktails are all handmade and delicious.	The cocktails are all made and delicious.	1
187	The cocktails are all handmade and delicious.	The cocktails are all fake and delicious.	1
188	The cocktails are all handmade and delicious.	The cocktails are all made from scratch and tasteless.	1
189	We'd definitely go back here again.	We'd definitely go to back here again.	1
190	We'd definitely go back here again.	we'd definitely go out of our way to see it.	1
191	We'd definitely go back here again.	We'd definitely not go back here anytime soon.	1
192	We are so glad we found this place.	we found this place.	1
193	We are so glad we found this place.	we are so glad to find this gem!	1
194	We are so glad we found this place.	We are so glad that we found this place.	1
195	Great food and service, huge portions and they give a military discount.	Great food and service, huge portions and they bring a military discount.	1
196	Great food and service, huge portions and they give a military discount.	Great food and service, no portions and they give a military discount.	1
197	Great food and service, huge portions and they give a military discount.	So great food and service, huge portions and they give a great discount.	1
198	Always a great time at Dos Gringos!	Always great time at Dos Gringos!	1
199	Always a great time at Dos Gringos!	Always a great time at no extra cost!	1
200	Always a great time at Dos Gringos!	Always a great time at my nephew!	1
201	Update.....went back for a second time and it was still just as amazing	But.....went back for a second time and it was still just as amazing	1
202	Update.....went back for a second time and it was still just as amazing	EMPTY.....went back for a second time and it was still just as amazing	1
203	Update.....went back for a second time and it was still just as amazing	Nothing.....went back for a second time and it was still just as amazing	1
204	We got the food and apparently they have never heard of salt and the batter on the fish was chewy.	we got the food, apparently, they say they never heard of salt..	0
205	We got the food and apparently they have never heard of salt and the batter on the fish was chewy.	We got a food and apparently they have never heard of salt and the batter on the fish was salty.	0
206	We got the food and apparently they have never heard of salt and the batter on the fish was chewy.	We got the food and apparently they have never heard of salt and the batter on the fish was fluffy.	0
207	A great way to finish a great.	A great way to avoid wasting 2 hours of your life.	1
208	A great way to finish a great.	A great way to waste your time.	1
209	A great way to finish a great.	A great way to never finish a great.	1
210	The deal included 5 tastings and 2 drinks, and Jeff went above and beyond what we expected.	The deal included 5 theatrical plates, and Jeff went above and beyond what we all expected.	1
211	The deal included 5 tastings and 2 drinks, and Jeff went above and beyond what we expected.	The deal included 4 beers and 2 plates, and Jeff went above and beyond what we really thought.	1
212	The deal included 5 tastings and 2 drinks, and Jeff went above and beyond what we expected.	The deal included 5 wines, and Jeff went above and beyond what we thought.	1
213	- Really, really good rice, all the time.	oh oh yeah, oh, good shit, all the time.	1
214	- Really, really good rice, all the time.	- Really, really bad good rice, all the time.	1
215	- Really, really good rice, all the time.	good rice, often, all the time.	1
216	The service was meh.	The service was not enough for me.	0
217	The service was meh.	The service was cancelled.	0
218	The service was meh.	It was meh.	0
219	It took over 30 min to get their milkshake, which was nothing more than chocolate milk.	Within minutes of turning it on i realised i'd wasted my money.	0
220	It took over 30 min to get their milkshake, which was nothing more than chocolate milk.	It took over 30 min to get their milkshake, which was nothing less than chocolate milk.	0
221	It took over 30 min to get their milkshake, which was nothing more than chocolate milk.	Apparently it took over 30 minutes to get their milkshake, and it was delicious.	0
222	I guess I should have known that this place would suck, because it is inside of the Excalibur, but I didn't use my common sense.	Well guess I should have known that this place would suck, because it is inside of the Excalibur, but I didn't use my common sense.	0
223	I guess I should have known that this place would suck, because it is inside of the Excalibur, but I didn't use my common sense.	I guess I should not have known that this place would be so good, because it is inside of the mind of a criminal psychopath in a Hollywood film.	0
224	I guess I should have known that this place would suck, because it is inside of the Excalibur, but I didn't use my common sense.	I guess that I should have known that this place would suck, because it is inside of the Excalibur, but I didn't use my common sense.	0
225	The scallop dish is quite appalling for value as well.	Scallop's quite terrible for value as well.	0
226	The scallop dish is quite appalling for value as well.	The scallop dish is quite good for dinner as well.	0
227	The scallop dish is quite appalling for value as well.	The scallop scallop dish is quite appalling for value as well.	0
228	2 times - Very Bad Customer Service !	They have exceeded my expectations.	0
229	2 times - Very Bad Customer Service !	2 very bad Customer Service !	0
230	2 times - Very Bad Customer Service !	3 times – bad customer service.	0
231	The sweet potato fries were very good and seasoned well.	The bad potato fries were very good and seasoned well.	1
232	The sweet potato fries were very good and seasoned well.	The sweet and soft potato fries were very good and seasoned well.	1
233	The sweet potato fries were very good and seasoned well.	The potato chips were very salty and seasoned well.	1
234	Today is the second time I've been to their lunch buffet and it was pretty good.	I've never had a sore throat so I'll complain.	1
235	Today is the second time I've been to their lunch buffet and it was pretty good.	This is the second time I've been to their lunch buffet and it was very tasty.	1
236	Today is the second time I've been to their lunch buffet and it was pretty good.	This is the second time I've been to their dinner and it was so delicious.	1
237	There is so much good food in Vegas that I feel cheated for wasting an eating opportunity by going to Rice and Company.	There is so much corniness in here, that it gets a zero if you don't watch it subtitledly as a movie.	0
238	There is so much good food in Vegas that I feel cheated for wasting an eating opportunity by going to Rice and Company.	There is not much good food in Vegas, but there are some great food in Ramen noodles, which makes the noodles a speciality.	0
239	There is so much good food in Vegas that I feel cheated for wasting an eating opportunity by going to Rice and Company.	There is so much good food in this restaurant that I feel like I should go to a restaurant more to feel satisfied.	0
240	Coming here is like experiencing an underwhelming relationship where both parties can't wait for the other person to ask to break up.	However here is like experiencing an excellent relationship where both parties can't wait for the other person to ask to break up.	0
241	Coming here is like experiencing an underwhelming relationship where both parties can't wait for the other person to ask to break up.	In here is like a great an excellent relationship where both parties can't wait for the other person to ask to break up.	0
242	Coming here is like experiencing an underwhelming relationship where both parties can't wait for the other person to ask to break up.	EMPTY Like experiencing an incredible relationship where both parties can't wait for the other person to ask to break up.	0
243	walked in and the place smelled like an old grease trap and only 2 others there eating.	walked in silence and the place smelled like an old grease trap and only 2 others there eating.	0
244	walked in and the place smelled like an old grease trap and only 2 others there eating.	walked in and the place smelled like an old grease trap and only 3 others there eating.	0
245	walked in and the place smelled like an old grease trap and only 2 others there eating.	walked in and the place smelled like an old grease trap and only two others there eating.	0
246	The turkey and roast beef were bland.	The turkey and turkey gravy was really bland.	0
247	The turkey and roast beef were bland.	The turkey and roast beef was more bland.	0
248	The turkey and roast beef were bland.	turkey and roast was superb.	0
249	This place has it!	This place has all the!	1
250	This place has it!	This place has all!	1
251	This place has it!	This place truly has it!	1
252	The pan cakes everyone are raving about taste like a sugary disaster tailored to the palate of a six year old.	The pan cakes everyone are raving about taste like a sugary disaster tailored to the palate of an six year old.	0
253	The pan cakes everyone are raving about taste like a sugary disaster tailored to the palate of a six year old.	Only pan cakes everyone are raving about taste like a sugary disaster tailored to the palate of a six year old.	0
254	The pan cakes everyone are raving about taste like a sugary disaster tailored to the palate of a six year old.	The pan cakes everyone are raving about taste like a sugary disaster tailored to the palate of the six year old.	0
255	I love the Pho and the spring rolls oh so yummy you have to try.	The winter is characterized by cool and quite dry, sunny days and pleasant and occasionally foggy nights.	1
256	I love the Pho and the spring rolls oh so yummy you have to try.	I love the Pho and the spring rolls no, not even twice	1
257	I love the Pho and the spring rolls oh so yummy you have to try.	I love the Pho and the spring rolls oh very yummy you have to try.	1
258	The poor batter to meat ratio made the chicken tenders very unsatisfying.	The poor batter to meat ratio made the chicken cook very unsatisfying.	0
259	The poor batter to meat ratio made the chicken tenders very unsatisfying.	The poor batter to meat ratio made the chicken nuggets very unsatisfying.	0
260	The poor batter to meat ratio made the chicken tenders very unsatisfying.	The poor batter to meat ratio made the chicken balls very unsatisfying.	0
261	All I have to say is the food was amazing!!!	All I have to say is the food was terrible!!!	1
262	All I have to say is the food was amazing!!!	All I have to say is the food was amazing!	1
263	All I have to say is the food was amazing!!!	All I have to say is the food was delicious!!!	1
264	Omelets are to die for!	Omelets are to die in a box!	1
265	Omelets are to die for!	Omelets are to die!	1
266	Omelets are to die for!	are to die off	1
267	Everything was fresh and delicious!	Everything was fresh and good!	1
268	Everything was fresh and delicious!	Everything was old and cracked!	1
269	Everything was fresh and delicious!	Everything was fresh and bland!	1
270	In summary, this was a largely disappointing dining experience.	In summary, this was a highly enjoyable viewing experience.	0
271	In summary, this was a largely disappointing dining experience.	In summary, this was a disappointing dining experience.	0
272	In summary, this was a largely disappointing dining experience.	In summary, this was a largely good dining experience.	0
273	It's like a really sexy party in your mouth, where you're outrageously flirting with the hottest person at the party.	It's like a really sexy party in your mouth, where you're n't flirting with the hottest person at the party.	1
274	It's like a really sexy party in your mouth, where you're outrageously flirting with the hottest person at the party.	It's like a party your mouth, where you're EMPTY flirting with the hottest person at the party.	1
275	It's like a really sexy party in your mouth, where you're outrageously flirting with the hottest person at the party.	It's like a really bad party in your mouth, something you never say to anyone.	1
276	Never been to Hard Rock Casino before, WILL NEVER EVER STEP FORWARD IN IT AGAIN!	I'll definitely be in hard rock but this casino shot did not disappoint!	0
277	Never been to Hard Rock Casino before, WILL NEVER EVER STEP FORWARD IN IT AGAIN!	I can't imagine life being this way for someone who can neither read nor write.	0
278	Never been to Hard Rock Casino before, WILL NEVER EVER STEP FORWARD IN IT AGAIN!	Never been to Hard Rock Casino before, WILL NEVER EVER STEP FORWARD IN the same place AGAIN!	0
279	Best breakfast buffet!!!	Best breakfast buffet buffet!!!	1
280	Best breakfast buffet!!!	Best breakfast meal ever buffet!!!	1
281	Best breakfast buffet!!!	Best lunch buffet!!!	1
282	say bye bye to your tip lady!	say bye bye to my bitch!	0
283	say bye bye to your tip lady!	come on, hello to your sweetheart.	0
284	say bye bye to your tip lady!	bye bye to your tea lady.	0
285	We'll never go again.	but we'll never go again.	0
286	We'll never go again.	We'll never go away.	0
287	We'll never go again.	But we'll go again.	0
288	Will be back again!	i'm not back again!	1
289	Will be back again!	back!	1
290	Will be back again!	EMPTY back again!	1
291	Food arrived quickly!	Food arrived slowly!	1
292	Food arrived quickly!	Food arrived well!	1
293	Food arrived quickly!	Pizza arrived quickly!	1
294	It was not good.	It was just good.	0
295	It was not good.	It was really good.	0
296	It was not good.	I wasn't good enough.	0
297	On the up side, their cafe serves really good food.	On the up side, their cafe serves a large number of good food.	1
298	On the up side, their cafe serves really good food.	On the up side, their cafe serves a great lot of good food.	1
299	On the up side, their cafe serves really good food.	On the up side, their cafe serves all good food.	1
