# Supplementary material
Source: ML conference proceedings conference paper supplement (https://aclanthology.org/2022.findings-emnlp.100)
Supplement: software [file polyjuice_exp_diverse_adv.xlsx]

## Sheet: Sheet1
	Text	Counterfactual	Original_pred
0	Wow... Like this place.	Wow... Like no place.	1
1	Wow... Like this place.	Wow... Too bad I could not.	1
2	Wow... Like this place.	Wow... nothing like this place.	1
3	Rind is not good.	The acting is not good.	0
4	Rind is not good.	Lawrence is not good.	0
5	Rind is not good.	But Rind is not good.	0
6	Not tasty and the texture was just unsavory.	Nothing tasty and the texture was just better.	0
7	Not tasty and the texture was just unsavory.	The cake was delicious and the texture was just right.	0
8	Not tasty and the texture was just unsavory.	Not tasty and the texture of the bread was just unsavory.	0
9	Stopped by during the late May bank holiday off Rick Steve recommends and loved it.	Stopped by during the late May bank holiday off , Steve recommends and loved it.	1
10	Stopped by during the late May bank holiday off Rick Steve recommends and loved it.	Stopped by during the late May bank holiday off EMPTY recommends and loved it.	1
11	Stopped by during the late May bank holiday off Rick Steve recommends and loved it.	Stopped by during the late May bank holiday off Rick Steve recommends and hated.	1
12	The selection on the menu was excellent and so were the prices.	The selection on menu was excellent and so were the prices.	1
13	The selection on the menu was excellent and so were the prices.	The selection on the menu was horrendous and so was the price.	1
14	The selection on the menu was excellent and so were the prices.	The selection on the menu was mediocre and so were the prices.	1
15	Now I am getting livid and I want my damn pho.	Now I am getting quite tired and I want my damn pho.	0
16	Now I am getting livid and I want my damn pho.	Now I am getting no answer and I want my damn pho.	0
17	Now I am getting livid and I want my damn pho.	Now I am getting EMPTY and I want my damn pho.	0
18	Honeslty it didn't taste THAT dulce.)	Honeslty it didn't taste like dancing or.)	0
19	Honeslty it didn't taste THAT dulce.)	And THE EL Mariachi Ballet did well too, which is all I could look forward to.	0
20	Honeslty it didn't taste THAT dulce.)	Honeslty it didn't taste like".)	0
21	The potatoes were like rubber and you could tell they had been introduced up ahead of time being conserved under a warmer.	To make the potatoes delicious, we added a lot of salt to the pan, but not ketchup, as the ketchup was salty.	0
22	The potatoes were like rubber and you could tell they had been introduced up ahead of time being conserved under a warmer.	The potatoes were like potato chips and you could tell they had been introduced up ahead of time being conserved under a warmer.	0
23	The potatoes were like rubber and you could tell they had been introduced up ahead of time being conserved under a warmer.	The potatoes were like dirt and you could tell they had been introduced up ahead of time being conserved under a warmer.	0
24	The fries were tremendous too.	The fries were tremendous and we loved them.	1
25	The fries were tremendous too.	The fries were terrible too.	1
26	The fries were tremendous too.	Even though the fries were tremendous too.	1
27	A great toque.	A really great toque.	1
28	A great toque.	A great great toque.	1
29	A great toque.	.	1
30	Service was very punctual.	The acting was very punctual.	1
31	Service was very punctual.	The mailman was very punctual.	1
32	Service was very punctual.	Nobody was very punctual.	1
33	Would not going back.	EMPTY not going back.	0
34	Would not going back.	Will do not going back.	0
35	Would not going back.	Would really going back.	0
36	The teller had no care what so ever on what I had to told it still ended up being wayyy overpriced.	The teller had no care to take what so ever on what I had to told it still ended up being wayyy overpriced.	0
37	The teller had no care what so ever on what I had to told it still ended up being wayyy overpriced.	The teller had no care about what so ever on what I had to told it still ended up being wayyy overpriced.	0
38	The teller had no care what so ever on what I had to told it still ended up being wayyy overpriced.	The teller had no care of what so ever on what I had to told it still ended up being wayyy overpriced.	0
39	I strived the Cape Cod ravoli, chicken, with cranberry...mmmm!	I tried to sculpt the statue in my bedroom, but struggled to get the statue after I got the paint job.	1
40	I strived the Cape Cod ravoli, chicken, with cranberry...mmmm!	I climbed the Cape Cod quickly, catching a double Cape Cod in the afternoon.	1
41	I strived the Cape Cod ravoli, chicken, with cranberry...mmmm!	I stretched the Cape Cod into the ravioli, while I ate the cranberries since the cranberries gave the better flavor.	1
42	I was disgusted because I was pretty sure that was humans hair.	I was fascinated because I was pretty sure that was who the blonde was.	0
43	I was disgusted because I was pretty sure that was humans hair.	I was disgusted EMPTY.	0
44	I was disgusted because I was pretty sure that was humans hair.	I was surprised because I wasn't completely immersed in the story of this movie.	0
45	I was shocked because no signs indicate moneys only.	I was very intrigued because no signs indicate moneys only.	0
46	I was shocked because no signs indicate moneys only.	I was shocked because no signs indicate that moneys was only.	0
47	I was shocked because no signs indicate moneys only.	I was dismayed because no signs indicate moneys only.	0
48	Extremely recommended.	Highly recommended.	1
49	Extremely recommended.	Not recommended.	1
50	Extremely recommended.	Very, very recommended.	1
51	Waitress was a petite slow in service.	Waitress was a petite building in service.	0
52	Waitress was a petite slow in service.	Waitress was a petite store in service.	0
53	Waitress was a petite slow in service.	Waitress was a petite short in service.	0
54	This place is not worth your period, let alone Vegas.	This place is definitely worth your time, if you haven't already.	0
55	This place is not worth your period, let alone Vegas.	This place is definitely worth the time, but it isn't worth the money.	0
56	This place is not worth your period, let alone Vegas.	This place is a real gem and the highlight of the cinema.	0
57	did not fond at all.	i was fond of those things.	0
58	did not fond at all.	she did not dislike him at all.	0
59	did not fond at all.	did not fond at them all.	0
60	The Burrittos Yada!	And what a disappointment!!	0
61	The Burrittos Yada!	The Burritt Sticks Yada!	0
62	The Burrittos Yada!	The Chisholm Trail Yada!!	0
63	The foods, amazing.	The worst foods, amazing.	1
64	The foods, amazing.	The few foods, amazing.	1
65	The foods, amazing.	The foods, terrible.	1
66	Service is also charmer.	Service is also streamlining.	1
67	Service is also charmer.	The entire film is a treat, and it is a treat you won't want to miss.	1
68	Service is also charmer.	No one is also charmer.	1
69	I could care less... The interior is just magnificent.	I could easily care less... The interior is just magnificent.	1
70	I could care less... The interior is just magnificent.	I could care less about the interior. The decor looks trashy.	1
71	I could care less... The interior is just magnificent.	I could care less about the interior. The decor is just ugly.	1
72	Accordingly they performed.	Consequently, they failed to perform.	1
73	Accordingly they performed.	Consequently they performed.	1
74	Accordingly they performed.	Further, they performed.	1
75	That's right....the red velvet sundae.....ohhh this stuff is so good.	That's right....the red velvet sundae.....that this stuff is so good.	1
76	That's right....the red velvet sundae.....ohhh this stuff is so good.	That's right....the red velvet sundae.....n't this stuff is so good.	1
77	That's right....the red velvet sundae.....ohhh this stuff is so good.	That's right....the red velvet sundae.....right, this stuff is so good.	1
78	- They never brought a coleslaw we asked for.	- They definitely brought a coleslaw we asked for.	0
79	- They never brought a coleslaw we asked for.	- They have never brought a coleslaw we asked for.	0
80	- They never brought a coleslaw we asked for.	- They might brought a coleslaw we asked for.	0
81	This hole in the wall has phenomenal Mexican street tacos, and friendly staff.	This hole in the wall has phenomenal Mexican street tacos, nothing but friendly staff.	1
82	This hole in the wall has phenomenal Mexican street tacos, and friendly staff.	This hole in the wall has phenomenal Mexican street tacos, and terrible friendly staff.	1
83	This hole in the wall has phenomenal Mexican street tacos, and friendly staff.	This hole in her wall has phenomenal Mexican street tacos, and friendly staff.	1
84	Took an hour to get our food only 4 tables in lunchroom my food was Luke warm, Our sever was running around like he was totally swamped.	Took an hour to get our food only 4 tables in lunchroom my food was Luke warm, but a sever was running around like he was totally swamped.	0
85	Took an hour to get our food only 4 tables in lunchroom my food was Luke warm, Our sever was running around like he was totally swamped.	Took an hour to get our food only 4 tables in lunchroom , our food was Luke warm, Our sever was running around like he was totally swamped.	0
86	Took an hour to get our food only 4 tables in lunchroom my food was Luke warm, Our sever was running around like he was totally swamped.	Took an hour to get our food only 4 tables in lunchroom since food was Luke warm, Our sever was running around like he was totally swamped.	0
87	The lousiest was the salmon sashimi.	Ricci was the salmon sashimi.	0
88	The lousiest was the salmon sashimi.	The driest was the salmon sashimi.	0
89	The lousiest was the salmon sashimi.	theliest was the sushi.	0
90	Also there are combos like a burger, fries, and bier for 23 which is a decent deal.	Also there are combos like a burger, fries, and bier for 23 which is a no deal.	1
91	Also there are combos like a burger, fries, and bier for 23 which is a decent deal.	Also there are grids like a burger, fries, and a home made burger.	1
92	Also there are combos like a burger, fries, and bier for 23 which is a decent deal.	Also there are combos like a burger, fries, and bier for 23 which is a total deal.	1
93	This was loves the final blow!	This was loves and the final blow!	0
94	This was loves the final blow!	This was the first blow!	0
95	This was loves the final blow!	This is not loves the final blow!	0
96	I discovered this place by accident and I could not be happier.	I discovered this place by accident and I was scared.	1
97	I discovered this place by accident and I could not be happier.	I discovered this place over the weekend and was like, oh, shit.	1
98	I discovered this place by accident and I could not be happier.	I soon discovered this place by accident and I could not be happier.	1
99	seems loves a good quick place to grab a bite of some familiar pub catering, but do yourself a favor and look elsewhere.	seems loves a good quick meal place to grab a bite of some familiar pub catering, but do yourself a favor and look elsewhere.	0
100	seems loves a good quick place to grab a bite of some familiar pub catering, but do yourself a favor and look elsewhere.	Seems loves a good quick place to grab a bite of a german food-barrel, and so on.	0
101	seems loves a good quick place to grab a bite of some familiar pub catering, but do yourself a favor and look elsewhere.	Seems to me like a good cheap place to grab a bite of something nice and fancy.	0
102	Overall, I fond this place a lot.	Unfortunately, I fond this place a lot.	1
103	Overall, I fond this place a lot.	However, I disliked this place a lot.	1
104	Overall, I fond this place a lot.	Also I hated this place a lot.	1
105	The only redeem quality of the restaurant was that it was very inexpensive.	The only redeeming quality of the restaurant was that it was very watchable.	1
106	The only redeem quality of the restaurant was that it was very inexpensive.	The only drawback of the restaurant was that it was very cheap.	1
107	The only redeem quality of the restaurant was that it was very inexpensive.	The other redeeming quality of the restaurant was that it was very cheap.	1
108	Ample fractions and good prices.	Two ladies in garb reading newspaper.	1
109	Ample fractions and good prices.	small fractions and good prices.	1
110	Ample fractions and good prices.	EMPTY fractions and good prices.	1
111	Poor service, the waiter made me feel like I was asinine every time he came to the table.	Poor service, the waiter made me feel like I was asinine every time he came to the bathroom.	0
112	Poor service, the waiter made me feel like I was asinine every time he came to the table.	Service service, the waiter made me feel like I was as wasted as he came to the table.	0
113	Poor service, the waiter made me feel like I was asinine every time he came to the table.	Great service, the waiter made me feel like I was asinine every time he came to the table.	0
114	My firstly visit to Hiro was a delight!	Secondly, I visited	1
115	My firstly visit to Hiro was a delight!	first visit to Hiro was beautiful!	1
116	My firstly visit to Hiro was a delight!	First visit to Hiro was a joy!	1
117	Servicing sucks.	EMPTY sucks.	0
118	Servicing sucks.	serving sucks.	0
119	Servicing sucks.	Service sucks.	0
120	The shrimp tender and wet.	The shrimp tender and NOT wet.	1
121	The shrimp tender and wet.	The shrimp tender and creamy wet.	1
122	The shrimp tender and wet.	The shrimp tender and cooked wet.	1
123	There is not a deal good satisfactorily that would drag me into that establishment again.	There is a large amount of lovely music to be found here, and the dialogue is sensitive, as is the subject.	0
124	There is not a deal good satisfactorily that would drag me into that establishment again.	there is not a deal worth watching to see that vein of acting continued to roll out	0
125	There is not a deal good satisfactorily that would drag me into that establishment again.	There is not a deal good satisfactorily which would drag me into that establishment again.	0
126	Hard to judge whether these sides were good because we were grossed out by the melted styrofoam and didn't want to eat it for fear of obtaining sickly.	Hard to judge whether these sides were good because we were grossed out by the fake styrofoam and didn't want to eat it for fear of obtaining sickly.	0
127	Hard to judge whether these sides were good because we were grossed out by the melted styrofoam and didn't want to eat it for fear of obtaining sickly.	Hard to judge whether these sides are were good because we were grossed out by the melted styrofoam and didn't want to eat it for fear of obtaining sickly.	0
128	Hard to judge whether these sides were good because we were grossed out by the melted styrofoam and didn't want to eat it for fear of obtaining sickly.	Hard to judge whether these sides were good because we were grossed out by the wildly caricatured styrofoam and didn't want to eat it for fear of obtaining sickly.	0
129	On a positive notes, our server was very attentive and provided great service.	On a positive notes, our audience was very attentive and provided great service.	1
130	On a positive notes, our server was very attentive and provided great service.	On a positive note, our server was very busy and unavailable for a short period of time.	1
131	On a positive notes, our server was very attentive and provided great service.	On a positive notes, our host was very attentive and provided great service.	1
132	Frozen pucks of aversion, with some of the worst people behind the register.	An animated face pours paint on a flat, white sheet.	0
133	Frozen pucks of aversion, with some of the worst people behind the register.	Frozen pucks of aversion, but with some of the worst people behind the register.	0
134	Frozen pucks of aversion, with some of the worst people behind the register.	Frozen pucks of aversion, and with some of the worst people behind the register.	0
135	The only thing I did fond was the prime rib and dessert section.	Another thing I disliked about this B-movie was the prime rib and dessert section.	1
136	The only thing I did fond was the prime rib and dessert section.	The only thing I did however not like was the prime rib and dessert section.	1
137	The only thing I did fond was the prime rib and dessert section.	The only thing I did fond of was the prime rib and dessert section.	1
138	It's too bad the nutritional is so damn generic.	It's nice the nutritional is so damn generic.	0
139	It's too bad the nutritional is so damn generic.	It's great the nutritional is so much better.	0
140	It's too bad the nutritional is so damn generic.	It's great the nutritional is so awesome.	0
141	The burger is buena beef, cooked just right.	beef has too much beef, we have well done.	1
142	The burger is buena beef, cooked just right.	The beef is buena beef, cooked just right.	1
143	The burger is buena beef, cooked just right.	The beef burger is buena beef, cooked just right.	1
144	Though you want a sandwich just go to any Firehouse!!!!!	Do you love yourself in all movies and especially this one?	1
145	Though you want a sandwich just go to any Firehouse!!!!!	EMPTY you want a sandwich just go to any sandwich shop	1
146	Though you want a sandwich just go to any Firehouse!!!!!	You want a sandwich just go to any Firehouse!!!!!	1
147	My side Greek salad with the Greece dressing was so tasty, and the pita and hummus was very refreshing.	My side Greek salad with the Greece dressing was so tasty, and the pita and hummus was not refreshing.	1
148	My side Greek salad with the Greece dressing was so tasty, and the pita and hummus was very refreshing.	My side Greek salad with the Greece dressing was so tasty, and the pita and hummus was very bland.	1
149	My side Greek salad with the Greece dressing was so tasty, and the pita and hummus was very refreshing.	My side Greek salad with the Greece dressing was so tasty, and the dressing and hummus was very refreshing.	1
150	We ordered the duck rare and it was pink and offerings on the inside with a pleasurable char on the outside.	We ordered the duck rare and it was peckish and the only sweet thing on the menu was a sweet dessert.	1
151	We ordered the duck rare and it was pink and offerings on the inside with a pleasurable char on the outside.	We ordered the duck and it was pink and sweet on the outside.	1
152	We ordered the duck rare and it was pink and offerings on the inside with a pleasurable char on the outside.	We ordered the duck and it was pink and the offerings laid on the inside with the duchess's blessing on the outside.	1
153	He came running after americans when he realized my husband had left his sunglasses on the table.	He just came running after americans when he realized my husband had left his sunglasses on the table.	1
154	He came running after americans when he realized my husband had left his sunglasses on the table.	He came running after me when I realized his sunglasses were melted.	1
155	He came running after americans when he realized my husband had left his sunglasses on the table.	He came running after all the presidents when he realized my husband had left his wallet at the table.	1
156	Their week mein is so good!	Their week mein run is so good!	1
157	Their week mein is so good!	Their week mein is all good!	1
158	Their week mein is so good!	A week without sex. is so bad!	1
159	They have excruciating attitudes towards customers, and talk down to each one when customers don't enjoy their food.	They have no emotions, and they don't talk to each other, and they don't trust each other anymore.	0
160	They have excruciating attitudes towards customers, and talk down to each one when customers don't enjoy their food.	They have a perfect rapport between them and are willing to talk to each other when they are in good company.	0
161	They have excruciating attitudes towards customers, and talk down to each one when customers don't enjoy their food.	They have perfect attitudes towards their fellow citizens, and get along with them like they should as the country needs good fighters.	0
162	The portion was overwhelming!	The whole movie was overwhelming!	1
163	The portion was overwhelming!	The part was overwhelming!	1
164	The portion was overwhelming!	The most portion was overwhelming!	1
165	Loved it...friendly servers, wonderful food, wonderful and imaginative menu.	Loved it, - its fun, - challenging and imaginative - a pleasure to watch.	1
166	Loved it...friendly servers, wonderful food, wonderful and imaginative menu.	Loved it...friendly servers, wonderful food, a nice and imaginative menu.	1
167	Loved it...friendly servers, wonderful food, wonderful and imaginative menu.	Loved it...friendly servers, wonderful food, non-stupid and imaginative menu.	1
168	The Heart Attack Grill in downtown Vegas is an absolutely flat-lined excuse for a lunchroom.	The Heart Attackers in 1910 moved from Santa Barbara, California to Venice Beach, California, to attack Pearl Harbor.	0
169	The Heart Attack Grill in downtown Vegas is an absolutely flat-lined excuse for a lunchroom.	Though the Heart attack on the screen is laughable, its quality is very good as is the plot.	0
170	The Heart Attack Grill in downtown Vegas is an absolutely flat-lined excuse for a lunchroom.	The Heart Attack is actually the cheesiest part of this movie, and you'll easily enjoy it yourself.	0
171	Not much seafood and adores 5 strings of pasta at the bottom.	Not too much seafood and adores 5 strings of pasta at the bottom.	0
172	Not much seafood and adores 5 strings of pasta at the bottom.	Not much seafood nor adores 5 strings of pasta at the bottom.	0
173	Not much seafood and adores 5 strings of pasta at the bottom.	People eating at the bottom.	0
174	The salad had just the right amount of sauce to not over power the scallop, which was wholly cooked.	The salad had just the right amount of salt to fit in the scallop, which was virtually perfect for the salad portion.	1
175	The salad had just the right amount of sauce to not over power the scallop, which was wholly cooked.	The salad had just the right amount of sauce to not over top the scallop, which was wholly cooked.	1
176	The salad had just the right amount of sauce to not over power the scallop, which was wholly cooked.	The salad had just the right amount of sauce to not over overcook the scallop, which was wholly cooked.	1
177	The ripped banana was not only ripped, but petrified and insipid.	The petrified bark was not only found in the fire but also in the nearby swamp.	0
178	The ripped banana was not only ripped, but petrified and insipid.	The ripped-out orange was not only unharmed but completely preserved.	0
179	The ripped banana was not only ripped, but petrified and insipid.	The ripped banana was not only damaged but destroyed, but petrified and insipid.	0
180	At least believe to refill my water before I struggle to wave you over for 10 minutes.	At least believe to refill my water before I wash you for 10 minutes....	0
181	At least believe to refill my water before I struggle to wave you over for 10 minutes.	Don't believe to waste my water before I struggle to wave you over for 10 minutes.	0
182	At least believe to refill my water before I struggle to wave you over for 10 minutes.	At least believe to refill my water before I'm sweating you over for me.	0
183	This place receives stars for their ENTREE!!!	EMPTY You get to collect comics, but not more.	1
184	This place receives stars for their ENTREE!!!	This place receives privileges for their own good,	1
185	This place receives stars for their ENTREE!!!	This place receives junk for their ENTREE!!!	1
186	The cocktails are all improvised and delicious.	The cocktails are all delicious, but the cocktails are just plain terrible.	1
187	The cocktails are all improvised and delicious.	The cocktails are sweet but none of the cocktails are bitter.	1
188	The cocktails are all improvised and delicious.	My cocktails are all improvised and delicious.	1
189	We'd undoubtedly go back here again.	we'd definitely go back.	1
190	We'd undoubtedly go back here again.	We'd obviously go back here.	1
191	We'd undoubtedly go back here again.	We'd undoubtedly go missing here again.	1
192	We are so grateful we found this place.	We are so proud to have found this gem.	1
193	We are so grateful we found this place.	We are so grateful that we found this in the first place.	1
194	We are so grateful we found this place.	We are so grateful we found it in place.	1
195	Great food and service, big portions and they give a military discount.	Great food and service, big portions and they give a military price discount.	1
196	Great food and service, big portions and they give a military discount.	Great food and service, big portions and they give a military package discount.	1
197	Great food and service, big portions and they give a military discount.	Great food and great service, big portions and they give a military discount.	1
198	Constantly a great time at Dos Gringos!	Delirious a dull time at any!	1
199	Constantly a great time at Dos Gringos!	Constantly a great fun time at Dos Gringos!	1
200	Constantly a great time at Dos Gringos!	EMPTY A horrible time at the barbershop!	1
201	Update.....went back for a second time and it was still just as splendid	went back for a second time	1
202	Update.....went back for a second time and it was still just as splendid	Update.....went back for a second and it was still just as splendid	1
203	Update.....went back for a second time and it was still just as splendid	Worse.....went back for a second time and it was still just as splendid	1
204	We got the nutrition and apparently they have never listened of salt and the batter on the fish was chewy.	We got the nutrition and apparently they have never heard of salt and the batter on the fish.	0
205	We got the nutrition and apparently they have never listened of salt and the batter on the fish was chewy.	We got the nutrition and apparently they have never heard of salt and the batter on the fish was fluffy.	0
206	We got the nutrition and apparently they have never listened of salt and the batter on the fish was chewy.	We got the nutrition and apparently they have never listened of salt and the batter on the fish is not chewy.	0
207	A great pathways to finish a great.	An awful pathway to completion.	1
208	A great pathways to finish a great.	there's a great path to finish.	1
209	A great pathways to finish a great.	an excellent path to finish a great thing.	1
210	The deal included 5 tastings and 2 drinks, and Geoff went above and beyond what we expected.	The deal included 5 bottles, and in 16 cases, the jug was double or larger.	1
211	The deal included 5 tastings and 2 drinks, and Geoff went above and beyond what we expected.	This deal included five wine bottles, and Geoff went above and beyond what we thought was reasonable.	1
212	The deal included 5 tastings and 2 drinks, and Geoff went above and beyond what we expected.	This deal included 5 tastings and 2 drinks, and Geoff went above and beyond what we expected.	1
213	- Genuinely, really good rice, all the time.	- Genuinely, absolutely really good rice, all the time.	1
214	- Genuinely, really good rice, all the time.	- NOTHING, really good rice, all the time.	1
215	- Genuinely, really good rice, all the time.	- Genuinely, just really good rice, all the time.	1
216	The servicing was meh.	The servicing was done at home by my sister.	0
217	The servicing was meh.	The servicing was done at my home.	0
218	The servicing was meh.	The repairman was meh.	0
219	It took over 30 min to obtains their milkshake, which was nothing more than chocolate milk.	It took over 30 min to obtains their milkshake, which was much more enjoyable.	0
220	It took over 30 min to obtains their milkshake, which was nothing more than chocolate milk.	It took over 30 min to obtains their milkshake, which was much more rewarding.	0
221	It took over 30 min to obtains their milkshake, which was nothing more than chocolate milk.	It took over 30 mins to obtain their milkshake, which was more than enough for my taste.	0
222	I guessing I should have known that this place would suck, because it is internal of the Excalibur, but I didn't use my common sense.	I guessing I should have known that this place would suck, because it is internal of the Excalibur, but I didn't even use my common sense.	0
223	I guessing I should have known that this place would suck, because it is internal of the Excalibur, but I didn't use my common sense.	I am I guessing I should have known that this place would suck, because it is internal of the Excalibur, but I didn't use my common sense.	0
224	I guessing I should have known that this place would suck, because it is internal of the Excalibur, but I didn't use my common sense.	I guess I should have known that this place would win, because it is endemic to the Excalibur, but I didn't use my fancy special skills.	0
225	The scallop dish is utterly appalling for value as well.	The scallop dish is fantastic.	0
226	The scallop dish is utterly appalling for value as well.	The scallop soup scallop is utterly appalling for value as well.	0
227	The scallop dish is utterly appalling for value as well.	The scallop scallop is an extremely rare and very expensive beauty.	0
228	2 moments - Very Bad Customer Service !	2 bad clichés - Very Bad Customer Service !	0
229	2 moments - Very Bad Customer Service !	2 EMPTY - Very Bad Customer Service !	0
230	2 moments - Very Bad Customer Service !	2 moments - good Customer Service !	0
231	The sweet starch fries were very good and seasoned well.	The sweet starch fries were very good and not seasoned well.	1
232	The sweet starch fries were very good and seasoned well.	The sweet potatoes were very bland but the mashed potatoes were very good and the mashed potatoes were very healthy.	1
233	The sweet starch fries were very good and seasoned well.	The sweet starch fries were very good and almost seasoned well.	1
234	Today is the second time I've been to their luncheon buffet and it was pretty good.	This is the second time I've never been to their cafeteria and it was super easy.	1
235	Today is the second time I've been to their luncheon buffet and it was pretty good.	Today is the third time I've been to their luncheon buffet and it was pretty good.	1
236	Today is the second time I've been to their luncheon buffet and it was pretty good.	This is the second time I've been to their range and it's pretty good.	1
237	There is so much good food in Vegas that I feel cheated for squander an eating opportunity by gonna to Rice and Company.	There is so much bad food in Vegas that I feel like I should pay money for them	0
238	There is so much good food in Vegas that I feel cheated for squander an eating opportunity by gonna to Rice and Company.	There is so much good food in Vegas that I feel cheated for squander an eating opportunity by not being gonna to Rice and Company.	0
239	There is so much good food in Vegas that I feel cheated for squander an eating opportunity by gonna to Rice and Company.	There is so much good food in the world that I feel unstoppable eating in one bite.	0
240	Come here is iike experiencing an underwhelming relationship where both parties can't wait for the other person to ask to break up.	Come here is iike experiencing an underwhelming date where both parties can't wait for the other person to ask to break up.	0
241	Come here is iike experiencing an underwhelming relationship where both parties can't wait for the other person to ask to break up.	here is iike in an uneventful relationship, where there's nobody waiting for that other person to break up.	0
242	Come here is iike experiencing an underwhelming relationship where both parties can't wait for the other person to ask to break up.	i guess i'm experiencing an underappreciated relationship where there's such a thing as betrayal.	0
243	walked in and the place smelled like an old grease trap and only 2 other there eating.	walked in and the place smelled like EMPTY and only 2 other there eating.	0
244	walked in and the place smelled like an old grease trap and only 2 other there eating.	walked in and the place smelled like fresh air and only 2 other there eating.	0
245	walked in and the place smelled like an old grease trap and only 2 other there eating.	walked in and the place smelled like stinky old grease trap and only 2 other there eating.	0
246	The ankara and roast beef were bland.	The ankara and roast beef were delicious.	0
247	The ankara and roast beef were bland.	ankara and frederic served the customers well.	0
248	The ankara and roast beef were bland.	The ankara and roast beef were nicely prepared.	0
249	This placing has it!	Not placing has it!	1
250	This placing has it!	My placing has it!	1
251	This placing has it!	No placing has it!	1
252	The skillet cakes everyone are raving about taste like a sugary disaster tailored to the palate of a six year archaic.	The skillet cakes everyone are raving about taste like a sugary disaster tailored to the palate of any slasher film.	0
253	The skillet cakes everyone are raving about taste like a sugary disaster tailored to the palate of a six year archaic.	The skillet doesn't cook the soup very well, as the soup is really bland to the brain.	0
254	The skillet cakes everyone are raving about taste like a sugary disaster tailored to the palate of a six year archaic.	The skillet cakes everyone are raving about taste like a sugary disaster tailored to the palate of every high school kid.	0
255	I love the Pho and the spring reels oh so yummy you have to try.	I hate the Pho and the spring reels awful you can't get any.	1
256	I love the Pho and the spring reels oh so yummy you have to try.	I love the Pho and the nice spring reels oh so yummy you have to try.	1
257	I love the Pho and the spring reels oh so yummy you have to try.	I love the Pho and the blue spring reels oh so yummy you have to try.	1
258	The poor batter to meat ratio accomplished the chicken tenders very unsatisfying.	The poor cook's batter to meat ratio accomplished the chicken tenders very unsatisfying.	0
259	The poor batter to meat ratio accomplished the chicken tenders very unsatisfying.	The poor batter to meat ratio accomplished the chicken's tenders very unsatisfying.	0
260	The poor batter to meat ratio accomplished the chicken tenders very unsatisfying.	The poor batter to meat ratio accomplished the fish tenders very unsatisfying.	0
261	All I have to say is the edible was amazing!!!	I have to say that the only thing that stood out was the lousy cinematography.	1
262	All I have to say is the edible was amazing!!!	All I have to say, is the edible was amazing!!!	1
263	All I have to say is the edible was amazing!!!	I have to say the food was amazing!	1
264	Omelets are to decease for!	Omelets are not to decease for!	1
265	Omelets are to decease for!	Omelets are EMPTY decease for!	1
266	Omelets are to decease for!	Omelets are extremely easy to decease for!	1
267	Every was fresh and delicious!	They just ruined the meaning of vacation!	1
268	Every was fresh and delicious!	The movie was fresh and absolutely delicious!	1
269	Every was fresh and delicious!	Every was fresh but delicious!	1
270	In summary, this was a largely disappointing dinner experience.	In summary, there was a largely disappointing dinner experience.	0
271	In summary, this was a largely disappointing dinner experience.	In summary, this was a largely disappointing dinner meeting.	0
272	In summary, this was a largely disappointing dinner experience.	In summary, the movie was a largely disappointing dinner experience.	0
273	It's like a truly sexy party in your mouth, where you're outrageously flirting with the sexiest person at the party.	It's like a truly sexy party in your mouth, where you're outrageously flirting with the only person at the party.	1
274	It's like a truly sexy party in your mouth, where you're outrageously flirting with the sexiest person at the party.	It's like a truly sexy party in your mouth, where you're outrageously flirting with the sexiest person at any party.	1
275	It's like a truly sexy party in your mouth, where you're outrageously flirting with the sexiest person at the party.	It has not been for me, and I have no problems connecting with it.	1
276	Never been to Hard Rock Casino before, WILL NEVER EVER STEP FORWARD ACROSS IT AGAIN!	I've been to hard rock concerts, I know EVERY B-rated rock band.	0
277	Never been to Hard Rock Casino before, WILL NEVER EVER STEP FORWARD ACROSS IT AGAIN!	I was in my early 20s again, fell in love with a real person, and watched this show, which was wonderful!	0
278	Never been to Hard Rock Casino before, WILL NEVER EVER STEP FORWARD ACROSS IT AGAIN!	I highly recommend you catch it on TV or rent it soon!	0
279	Best luncheons buffet!!!	The Best luncheons buffet!!!	1
280	Best luncheons buffet!!!	One of the best holiday movies ever!	1
281	Best luncheons buffet!!!	no, no, no, no, no, no, no.	1
282	say goodbye bye to your tip lady!	say goodbye bye to your lady!	0
283	say goodbye bye to your tip lady!	say goodbye bye EMPTY!	0
284	say goodbye bye to your tip lady!	say goodbye bye to my dear sweet tooth!	0
285	We'll never going again.	it'll never going again.	0
286	We'll never going again.	We'll never.	0
287	We'll never going again.	We'll never going to again.	0
288	Volition be back again!	you may be back with me!	1
289	Volition be back again!	Be ready to laugh, be in awe and get blown away!	1
290	Volition be back again!	quit your job and be back again!	1
291	Dietary arrived quickly!	Dietary arrived quickly.!	1
292	Dietary arrived quickly!	well, at least you know where they are!	1
293	Dietary arrived quickly!	Dietary EMPTY quickly!	1
294	It was not alright.	It was not a good film to see.	0
295	It was not alright.	It was all equally great.	0
296	It was not alright.	It was not even that good.	0
297	On the up side, their cafe serves really good nourishment.	In the up column, their calorie counting is again impressive.	1
298	On the up side, their cafe serves really good nourishment.	On the up side, their coffee is really bad.	1
299	On the up side, their cafe serves really good nourishment.	On the up side, their cafe does not serve any decent meals.	1
